# Supplementary material for: Visible light-mediated intermolecular [2 + 2] photocycloaddition of 1-aryl-2-nitroethenes and olefins
Source: Royal Society of Chemistry journal article supplement (doi:10.1039/c9ob01146c), 2019-01-01
Supplement: c9ob01146c1.pdf [file c9ob01146c1.pdf]

Supporting Information for:

**Visible light-mediated intermolecular [2+2] photocycloaddition of  
1-aryl-2-nitroethenes and olefins: Reaction scope and mechanistic  
studies**

Lisa-Marie Mohr,<sup>a</sup> Andreas Bauer,<sup>a</sup> Christian Jandl,<sup>a</sup> and Thorsten Bach\*<sup>a</sup>

<sup>a</sup>Department Chemie and Catalysis Research Center (CRC), Technische Universität München,  
85747 Garching, Germany

thorsten.bach@ch.tum.de

## Table of Contents

|                                                                                   |     |
|-----------------------------------------------------------------------------------|-----|
| 1. General Information                                                            | 3   |
| 2. Analytical Methods and Equipment                                               | 3   |
| 3. Synthesis of Nitroethenes <b>1b-1o</b>                                         | 7   |
| 4. [2+2] Photocycloaddition of Nitroethenes <b>1a-1o</b> to 2,3-Dimethyl-2-butene | 22  |
| 5. Synthesis of Olefins                                                           | 42  |
| 6. [2+2] Photocycloaddition of Nitroethene <b>1a</b> to Different Olefins         | 47  |
| 7. UV-Vis Spectra of Nitroethenes <b>1a-1o</b>                                    | 73  |
| 8. Emission Spectroscopy of Nitroethene <b>1a</b>                                 | 74  |
| 9. NMR Spectra                                                                    | 75  |
| 10. X-ray Crystallographic Details                                                | 159 |
| 11. Determination of Quantum Yield                                                | 162 |
| 12. References                                                                    | 165 |

## 1. General Information

All preparations and manipulations of air and moisture sensitive compounds were carried out in flame dried glassware under an argon atmosphere using standard *Schlenk* techniques. Reactions at 0 °C were performed using an ice water cooling bath, reactions at -78 °C were performed using a dry ice/*iso*-propanol cooling bath. Tetrahydrofuran and dichloromethane were obtained water and oxygen free by a *Braun* MB SPS purification system using argon as inert gas and MB-Kol-M (3 Å molecular sieves) and MB-Kol-A (activated Al<sub>2</sub>O<sub>3</sub>) columns to remove residual water. Other dry solvents [acetonitrile (MeCN), methanol (MeOH), dimethylsulfoxide (DMSO); ≥ 99.8 % purity] were purchased from *Acros Organics*, *Sigma Aldrich* or *Fluka* and were used without further purification. Solvents for photochemical reactions were degassed in a continuous argon flow for 15 minutes, during which the previously flame-dried flask was placed inside an ultrasonic bath. Molecular sieves (3 or 4 Å) was added and the solvent was stored in a *Schlenk* flask under an argon atmosphere. Ethyl acetate (EtOAc), dichloromethane (CH<sub>2</sub>Cl<sub>2</sub>), pentane (P), cyclohexane (cHex), methanol (MeOH), toluene (Tol) and diethyl ether (Et<sub>2</sub>O) for column chromatography, thin layer chromatography or aqueous work-ups were distilled prior to use. Unless stated otherwise, all chemicals were purchased from commercial sources and used without further purification. Argon (4.8) and hydrogen (5.0) were obtained from *Westfalen* AG and were used without further purification.

## 2. Analytical Methods and Equipment

Irradiation experiments were performed in a *Rayonet* RPR-100 photochemical reactor (Southern New England Ultra Violet Company, Branford, CT, USA) or similarly designed replicas equipped with fluorescence lamps with  $\lambda_{\text{max}} = 419$  nm (16 lamps, cool white, 8 W, *Osram*).<sup>[1]</sup> Duran glass phototubes were used for irradiation experiments. Irradiation experiments at lower temperatures were performed with a *Huber* high-performance cryostat. Irradiation experiments with light emitting diodes (LEDs) were performed in *Schlenk* tubes ( $\text{Ø} = 1.0$  cm). High power LEDs with  $\lambda_{\text{max}} = 424$  nm (*Roithner* Lasertechnik, 350 mA, UF ~ 3.4 V) or  $\lambda_{\text{max}} = 382$  nm (*Avonec*, 700 mA, UF ~ 3.8 V), which were mounted on a passive heat sink, were used as the light source. The light was transmitted into the reaction via a Quarz glass rod ( $\text{Ø} = 0.8$  cm). Flash Column Chromatography was performed with silica 60 (*Merck*, 230-400 mesh) as the stationary phase. The eluent mixtures and the diameter of the column are indicated at each experiment individually. Thin Layer Chromatography (TLC) was performed on silica coated glass plates (*Merck*, silica 60, F<sub>254</sub>) with detection by UV light ( $\lambda = 254$  nm) and/or by staining with a potassium permanganate solution [KMnO<sub>4</sub>; potassium

permanganate (3.00 g), potassium carbonate (20.0 g) and aqueous sodium hydroxide solution (5 wt-%, 5.00 mL) in water (300 mL)] or with a cerium ammonium molybdate solution [CAM; cerium sulfate tetrahydrate (1.00 g), ammonium molybdate (25.0 g) and concentrated sulfuric acid (25.0 mL) in water (250 mL)] followed by heat treatment. Infrared (IR) Spectra were recorded on a *Perkin Elmer* Frontier IR FTR spectrometer by ATR technique. The signals are given in  $\tilde{\nu}$  [ $\text{cm}^{-1}$ ] and the signal intensity is assigned using the following abbreviations: br (broad), vs (very strong), s (strong), m (medium), w (weak). Nuclear Magnetic Resonance (NMR) Spectra were recorded at room temperature either on a *Bruker* AVHD 300, AVHD 400, AVHD 500 or an AV 500 cryo.  $^1\text{H}$  NMR spectra were referenced to the residual proton signal of  $\text{CDCl}_3$  ( $\delta = 7.26$  ppm) or  $\text{C}_6\text{D}_6$  ( $\delta = 7.16$  ppm).  $^{13}\text{C}$  NMR spectra were referenced to the  $^{13}\text{C}$ -D triplet of  $\text{CDCl}_3$  ( $\delta = 77.16$  ppm) or to the  $^{13}\text{C}$ -D triplet of  $\text{C}_6\text{D}_6$  ( $\delta = 128.06$  ppm). Apparent multiplets which occur as a result of coupling constant equality between magnetically nonequivalent protons are marked as virtual (*virt.*). The following abbreviations for single multiplicities were used: br broad, s singlet, d doublet, t triplet, q quartet, quint quintet, sext sextet, sept septet. Assignment and multiplicity of the  $^{13}\text{C}$  NMR signals were determined by two-dimensional NMR experiments (COSY, HSQC, HMBC). Melting Points were determined using a *Kofler* melting point apparatus (“Thermopan”, *Reichert*), with a range quoted to the nearest whole number. Mass Spectrometry (MS) was measured on an *Agilent* system [mass detection: *Agilent* 5973 Network Mass Selective Detector (EI, 70 eV)], which was coupled to a GC [*Agilent* 6890, column: HP-5MS (Dimethylpolysiloxane, 30 m), carrier gas: Helium]. High Resolution Mass Spectrometry (HRMS) was measured on a *Thermo Scientific* LTQ FT Ultra (ESI) or a *Thermo Scientific* DFS HRMS spectrometer (EI). UV/Vis Spectroscopy was measured on a *Perkin Elmer* Lambda 35 UV/Vis spectrometer. Spectra were recorded using a *Hellma* precision cell made of quartz SUPRASIL<sup>®</sup> with a pathway of  $d = 1$  mm. Solvents and concentrations are given for each spectrum. Luminescence Spectroscopy was measured on a *Horiba Scientific* Fluoromax-4 spectrofluorometer. The samples were prepared in a *Hellma* precision cell (Quarz SUPRASIL<sup>®</sup> (exc.: 4mm/emi.: 10 mm)).

Data sheet LED ( $\lambda_{\max} = 382 \text{ nm}$ ):

| Lehrstuhl OC 1 - TUM                                                               |                                                                                                                                                                                                                                                                                    |
|------------------------------------------------------------------------------------|------------------------------------------------------------------------------------------------------------------------------------------------------------------------------------------------------------------------------------------------------------------------------------|
|  |                                                                                                                                                                                                                                                                                    |
| <b>Datasheet LED033</b>                                                            |                                                                                                                                                                                                                                                                                    |
| <b>Av-380-3W</b>                                                                   |                                                                                                                                                                                                                                                                                    |
| <b>Basic Information</b>                                                           |                                                                                                                                                                                                                                                                                    |
| Type                                                                               | High-Power-LED                                                                                                                                                                                                                                                                     |
| Description                                                                        | Avonec 370-380 nm / 3 W                                                                                                                                                                                                                                                            |
| Manufacturer / Supplier                                                            | n/a / Avonec                                                                                                                                                                                                                                                                       |
| Order number / Date of purch.                                                      | n/a / 07/2016                                                                                                                                                                                                                                                                      |
| Internal lot / serial number                                                       | 2016-07 / LED033                                                                                                                                                                                                                                                                   |
| <b>Specification Manufacturer</b>                                                  |                                                                                                                                                                                                                                                                                    |
| Type / size                                                                        | single emitter / ca. 1 x 1 mm                                                                                                                                                                                                                                                      |
| Mechanical specification                                                           |                                                                                                                                                                                                                                                                                    |
| Electrical specification                                                           | 700 mA, UF 3.8 V                                                                                                                                                                                                                                                                   |
| Wavelength (range, typ.)                                                           | 380-390 nm, typ. n/a                                                                                                                                                                                                                                                               |
| Spectral width (FWHM)                                                              | n/a                                                                                                                                                                                                                                                                                |
| Datasheet                                                                          | n/a                                                                                                                                                                                                                                                                                |
| <b>Characterization</b>                                                            |                                                                                                                                                                                                                                                                                    |
| Description of measurement                                                         | Measured with Ocean-optics USB4000 spectrometer using a<br>calibrated setup (cosine corrector/fibre).<br>The distance between the emitting surface and the surface of<br>the cosine corrector was 20 mm. The LED was operated at<br>700 mA on a passive heat-sink at approx. 20 °C |
| Measured wavelength                                                                | 382 nm                                                                                                                                                                                                                                                                             |
| Measured spectral width                                                            | 13 nm                                                                                                                                                                                                                                                                              |
| Integral Reference intensity                                                       | 11360 $\mu\text{W}/\text{cm}^2$ (350-425 nm @ 20 mm distance, 4 mm cosine corr.)                                                                                                                                                                                                   |
| <b>Spectrum</b>                                                                    |                                                                                                                                                                                                                                                                                    |

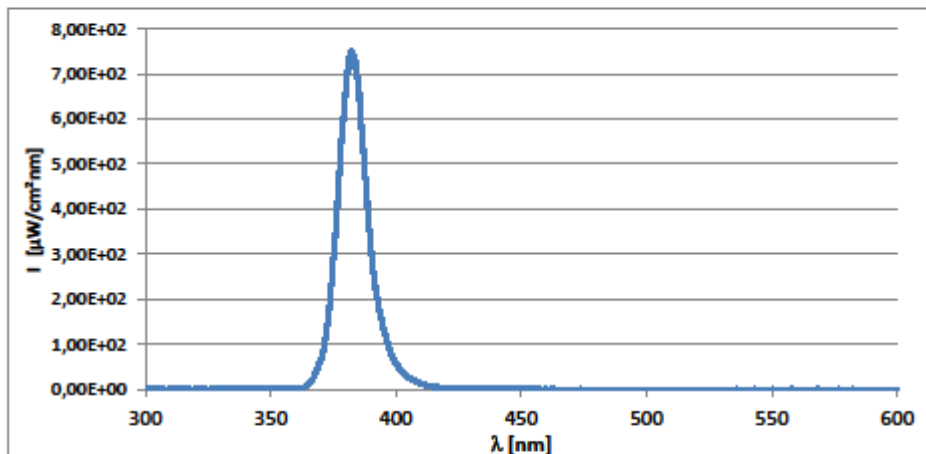

Data sheet LED ( $\lambda_{\max} = 424 \text{ nm}$ ):

| Lehrstuhl OC 1 - TUM                                                               |                                                                                                                                                                                                                                                                           |
|------------------------------------------------------------------------------------|---------------------------------------------------------------------------------------------------------------------------------------------------------------------------------------------------------------------------------------------------------------------------|
|  |                                                                                                                                                                                                                                                                           |
| <b>Datasheet LED011</b>                                                            |                                                                                                                                                                                                                                                                           |
| <b>H2A1-H420</b>                                                                   |                                                                                                                                                                                                                                                                           |
| <b>Basic Information</b>                                                           |                                                                                                                                                                                                                                                                           |
| Type                                                                               | High-Power-LED                                                                                                                                                                                                                                                            |
| Description                                                                        | H2A1-H420                                                                                                                                                                                                                                                                 |
| Manufacturer / Supplier                                                            | n/a / Roithner-Lasertechnik, Wien                                                                                                                                                                                                                                         |
| Order number / Date of purch.                                                      | H2A1-H420 / 2014/04                                                                                                                                                                                                                                                       |
| Internal lot / serial number                                                       | H2A1-H420_2014/04 / LED011                                                                                                                                                                                                                                                |
| <b>Specification Manufacturer</b>                                                  |                                                                                                                                                                                                                                                                           |
| Type                                                                               | single emitter, InGaN                                                                                                                                                                                                                                                     |
| Mechanical specification                                                           | hexagonal mount                                                                                                                                                                                                                                                           |
| Electrical specification                                                           | <500 mA, UF~3,4 V. abs. max. 500 mA                                                                                                                                                                                                                                       |
| Wavelength (range, typ.)                                                           | 420 nm                                                                                                                                                                                                                                                                    |
| Spectral width (FWHM)                                                              | 20 nm                                                                                                                                                                                                                                                                     |
| Datasheet                                                                          | h2a1-h420.pdf                                                                                                                                                                                                                                                             |
| <b>Characterization</b>                                                            |                                                                                                                                                                                                                                                                           |
| Description of measurement                                                         | Measured with Ocean-optics USB4000 spectrometer using a calibrated setup (cosine corrector/fibre).<br>The distance between the emitting surface and the surface of the cosine corrector was 20 mm. The LED was operated at 350 mA on a passive heat-sink at approx. 20 °C |
| Measured wavelength                                                                | 424 nm                                                                                                                                                                                                                                                                    |
| Measured spectral width                                                            | 17 nm                                                                                                                                                                                                                                                                     |
| Integral Reference intensity                                                       | 3,44 mW/mm <sup>2</sup> (350 mA, 390-490 nm @ 20 mm distance, 4 mm cc)<br>4,62 mW/mm <sup>2</sup> (500 mA, 390-490 nm @ 20 mm distance, 4 mm cc)                                                                                                                          |

**Spectrum**

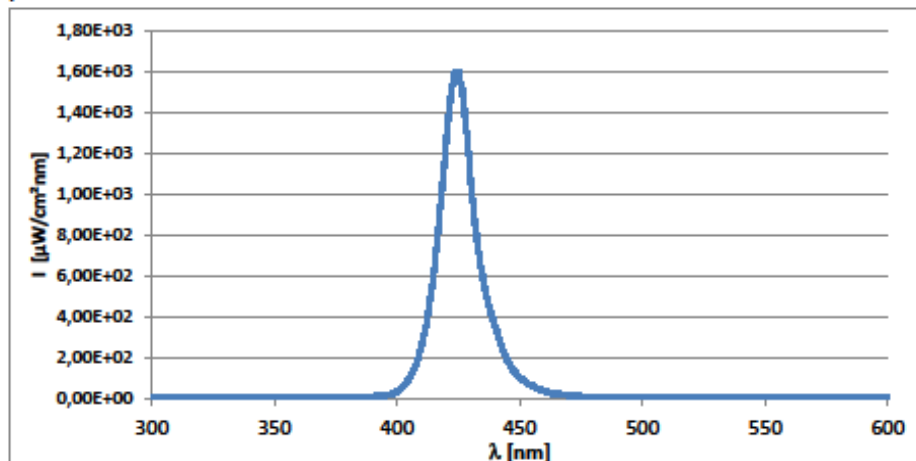

### 3. Synthesis of nitroethenes 1b-1o

*trans*- $\beta$ -Nitrostyrene (**1a**) was purchased from Sigma Aldrich (99% purity). The syntheses and analytical data for nitroethenes **1b-1e** have already been published in a communication.<sup>[2]</sup>

#### General Procedure 1 (GP 1) for the synthesis of nitroethenes:

Based on a literature-known procedure,<sup>[3]</sup> a solution of the aromatic aldehyde (1.00 equiv), nitromethane (3.00 – 35.0 equiv) and NH<sub>4</sub>OAc (1.00 – 2.50 equiv) in glacial acetic acid (the concentration is indicated in every experiment individually) was heated at reflux. The progress of the reaction was monitored via TLC. When full conversion was reached, the reaction solution was cooled to room temperature and poured onto ice water. The reaction mixture was partitioned between water and either dichloromethane or ethyl acetate (the solvent used is indicated at each experiment individually). The aqueous layer was extracted twice with the respective solvent (the volumes are indicated at each experiment individually). The combined organic layers were washed with saturated aqueous NaCl solution, dried over Na<sub>2</sub>SO<sub>4</sub>, filtered and concentrated *in vacuo*. If not noted otherwise, the crude product was purified by column chromatography.

#### General Procedure 2 (GP 2) for the synthesis of nitroethenes:

Based on a literature-known procedure,<sup>[4]</sup> a solution of the aromatic aldehyde (1.00 equiv) and NH<sub>4</sub>OAc (0.50 equiv) in nitromethane (*c* = 0.5 M) was heated at reflux. The reaction progress was monitored via TLC. When full conversion was reached, water was added, and the aqueous layer was extracted with dichloromethane. The combined organic layers were washed with saturated aqueous NaCl solution, dried over Na<sub>2</sub>SO<sub>4</sub>, filtered and concentrated *in vacuo*. The crude product was purified by recrystallization from ethanol.

#### General Procedure 3 (GP 3) for the synthesis of nitroethenes:

Based on a literature-known procedure,<sup>[5]</sup> nitromethane (1.00 equiv) was added to a solution of the aromatic aldehyde (1.00 equiv) in methanol (*c* = 2 M). NaOH (1.05 equiv; *c* = 3.5 M solution in water) was added slowly over 30 minutes at 0 °C. The solution was stirred for 30 minutes at 0 °C, warmed to room temperature and was held at that temperature for 30 minutes. The reaction solution was added to a vigorously stirred aqueous hydrochloric acid solution (*c* = 5 M), which resulted in the formation of a precipitate. The solution was stored at 4 °C overnight, filtered and the precipitate was washed with cold water. The crude product was purified by column chromatography.

**(E)-1-Fluoro-4-(2'-nitrovinyl)benzene (1f)**

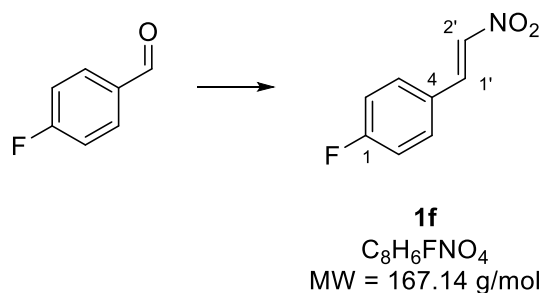

Following **GP 2**, a solution of 4-fluorobenzaldehyde (500 mg, 4.03 mmol, 1.00 equiv) and NH<sub>4</sub>OAc (341 mg, 4.43 mmol, 1.10 equiv) in nitromethane (29 mL) was heated at reflux for 16 hours. The work-up was performed with dichloromethane (2 × 50 mL) as the solvent. The crude product was purified by column chromatography (3 × 25 cm, P/Et<sub>2</sub>O = 19/1) to yield **1f** (375 mg, 2.24 mmol, 57%) as a pale-yellow coloured powder.

**TLC:**  $R_f = 0.35$  (P/Et<sub>2</sub>O = 9/1) [UV, KMnO<sub>4</sub>].

**mp:** 98 °C.

**UV-Vis:**  $\epsilon_{315} = 12720$  ( $c = 1$  mM, CH<sub>2</sub>Cl<sub>2</sub>).

**<sup>1</sup>H NMR** (500 MHz, CDCl<sub>3</sub>):  $\delta$  [ppm] = 7.98 (d, <sup>3</sup> $J = 13.8$  Hz, 1H, H-1'), 7.58–7.55 (m, 2H, H-2, H-6), 7.53 (d, <sup>3</sup> $J = 13.8$  Hz, 1H, H-2'), 7.19–7.10 (m, 2H, H-3, H-5).

**<sup>13</sup>C NMR** (75 MHz, CDCl<sub>3</sub>):  $\delta$  [ppm] = 165.1 (d, <sup>1</sup> $J_{CF} = 254.8$  Hz, C-1), 137.9 (d, C-1'), 137.0 (d, C-2'), 131.4 (d, <sup>3</sup> $J_{CF} = 8.9$  Hz, C-3, C-5), 126.5 (d, <sup>4</sup> $J_{CF} = 3.5$  Hz, C-4), 116.9 (d, <sup>2</sup> $J_{CF} = 22.2$  Hz, C-2, C-6).

The analytical data match those reported in the literature.<sup>[6]</sup>



**(E)-1-Chloro-4-(2'-nitrovinyl)benzene (1g)**

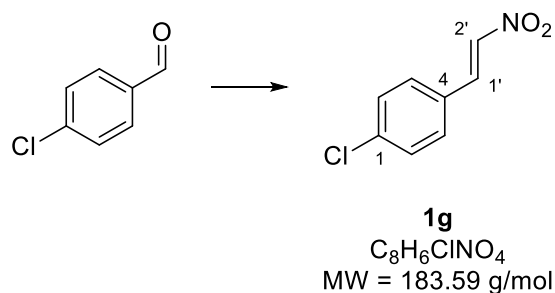

Following **GP 3**, nitromethane (190  $\mu$ L, 217 mg, 3.56 mmol, 1.00 equiv) and NaOH (1.1 mL,  $c = 3.4$  M) were added in sequence to a solution of freshly distilled 4-chlorobenzaldehyde (500 mg, 3.56 mmol, 1.00 equiv) in methanol (1.8 mL). The crude product was purified by column chromatography (3  $\times$  20 cm, P/Et<sub>2</sub>O = 19/1) to yield **1g** (260 mg, 1.42 mmol, 40%) as yellow coloured needles.

**TLC:**  $R_f = 0.42$  (P/Et<sub>2</sub>O = 9/1) [UV].

**mp:** 109 °C.

**UV-Vis:**  $\epsilon_{319} = 14400$  ( $c = 1$  mM, CH<sub>2</sub>Cl<sub>2</sub>).

**<sup>1</sup>H NMR** (500 MHz, CDCl<sub>3</sub>):  $\delta$  [ppm] = 7.96 (d,  $^3J = 13.7$  Hz, 1H, H-1'), 7.56 (d,  $^3J = 13.7$  Hz, 1H, H-2'), 7.51–7.47 (m, 2H, H-2, H-6), 7.46–7.42 (m, 2H, H-3, H-5).

**<sup>13</sup>C NMR** (101 MHz, CDCl<sub>3</sub>): 138.5 (s, C-1), 137.8 (d, C-1'), 137.6 (s, C-4), 130.4 (d, 2C, C-2, C-6), 129.9 (d, 2C, C-3, C-5), 128.7 (d, C-2').

The analytical data match those reported in the literature.<sup>[7]</sup>

**(E)-1-Bromo-4-(2'-nitrovinyl)benzene (1h)**

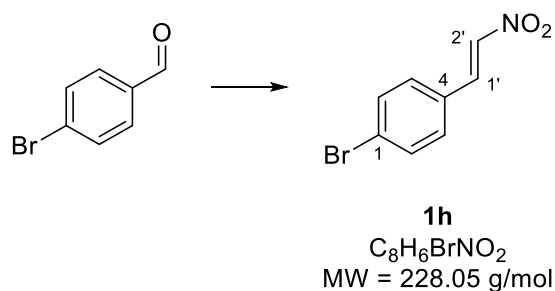

Following **GP 1**, a solution of 4-bromobenzaldehyde (1.00 g, 5.40 mmol, 1.00 equiv), nitromethane (10.1 mL, 11.5 g, 189 mmol, 35.0 equiv) and  $NH_4OAc$  (500 mg, 6.49 mmol, 1.20 equiv) in glacial acetic acid (20 mL) was heated at reflux for five hours. The work-up was performed with ethyl acetate ( $2 \times 50$  mL) as the solvent. The crude product was purified by column chromatography ( $4 \times 5$  cm, cHex/EtOAc = 5/1) to yield **1h** (1.11 g, 4.85 mmol, 90%) as a yellow coloured crystalline solid.

**TLC:**  $R_f = 0.81$  (cHex/EtOAc = 2/1) [UV,  $KMnO_4$ ].

**mp:** 141 °C.

**UV-Vis:**  $\epsilon_{322} = 20680$  ( $c = 1$  mM,  $CH_2Cl_2$ ).

**$^1H$  NMR** (500 MHz,  $CDCl_3$ ):  $\delta$  [ppm] = 7.95 (d,  $^3J = 13.7$  Hz, 1H, H-1'), 7.61–7.59 (m, 2H, H-2, H-6), 7.57 (d,  $^3J = 13.7$  Hz, 1H, H-2'), 7.43–7.40 (m, 2H, H-3, H-5).

**$^{13}C$  NMR** (101 MHz,  $CDCl_3$ ):  $\delta$  [ppm] = 137.9 (d, C-1'), 137.6 (d, C-2'), 132.9 (d, 2C, C-2, C-6), 130.5 (d, 2C, C-3, C-5), 129.1 (s, C-1), 126.9 (s, C-4).

The analytical data match those reported in the literature.<sup>[7]</sup>

### Methyl (*E*)-4-(2'-nitrovinyl)benzoate (**1i**)

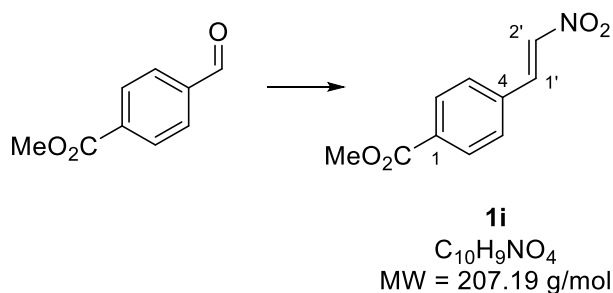

Following **GP 1**, a solution of methyl 4-formylbenzoate (500 mg, 3.05 mmol, 1.00 equiv), NH<sub>4</sub>OAc (141 mg, 1.83 mmol, 0.60 equiv) and nitromethane (197  $\mu$ L, 223 mg, 3.65 mmol, 1.20 equiv) in glacial acetic acid (2.5 mL) was heated at reflux for six hours. The work-up was performed with ethyl acetate (2  $\times$  10 mL) as the solvent. The crude product was purified by column chromatography (3  $\times$  20 cm, CH<sub>2</sub>Cl<sub>2</sub>) to yield **1i** (508 mg, 2.45 mmol, 80%) as a pale yellow coloured crystalline solid.

**TLC:**  $R_f$  = 0.40 (CH<sub>2</sub>Cl<sub>2</sub>) [UV].

**mp:** 145 °C.

**UV-Vis:**  $\epsilon_{311}$  = 20190 ( $c$  = 1 mM, CH<sub>2</sub>Cl<sub>2</sub>).

**<sup>1</sup>H NMR** (500 MHz, CDCl<sub>3</sub>):  $\delta$  [ppm] = 8.13–8.10 (m, 2H, H-2, H-6), 8.02 (d, <sup>3</sup> $J$  = 13.7 Hz, 1H, H-1'), 7.64–7.60 (m, 3H, H-2', H-3, H-5), 3.95 (s, 3H, CO<sub>2</sub>CH<sub>3</sub>).

**<sup>13</sup>C NMR** (101 MHz, CDCl<sub>3</sub>):  $\delta$  [ppm] = 168.6 (s, CO<sub>2</sub>Me), 138.8 (d, C-2'), 137.7 (d, C-1'), 134.3 (s, C-1), 133.2 (s, C-4), 130.6 (d, 2C, C-2, C-6), 129.1 (d, 2C, C-3, C-5), 52.7 (q, ArCO<sub>2</sub>CH<sub>3</sub>).

The analytical data match those reported in the literature.<sup>[7]</sup>

**(E)-1-Chloro-3-(2'-nitrovinyl)benzene (1j)**

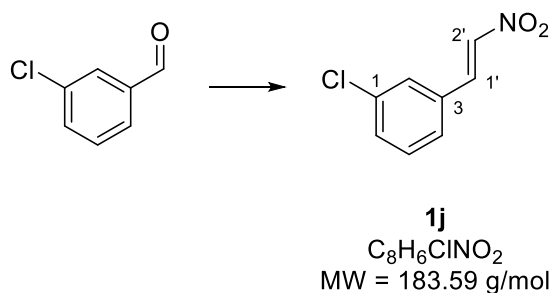

Following **GP 1**, a solution of freshly distilled 3-chlorobenzaldehyde (1.00 g, 21.3 mmol, 1.00 equiv), nitromethane (3.43 mL, 3.91 g, 64.0 mmol, 3.00 equiv) and NH<sub>4</sub>OAc (4.11 g, 53.4 mmol, 2.50 equiv) in glacial acetic acid (10 mL) was heated at reflux for six hours. The work-up was performed with dichloromethane (2 × 30 mL) as the solvent. The crude product was purified by column chromatography (6 × 12 cm, cHex/EtOAc = 20/1) to yield **1j** (2.80 g, 15.3 mmol, 71%) as a yellow coloured solid.

**TLC:**  $R_f = 0.22$  (cHex/EtOAc = 9/1) [UV, KMnO<sub>4</sub>].

**mp:** 62 °C.

**UV-Vis:**  $\epsilon_{302} = 15690$  ( $c = 1$  mM, CH<sub>2</sub>Cl<sub>2</sub>).

**<sup>1</sup>H NMR** (500 MHz, CDCl<sub>3</sub>):  $\delta$  [ppm] = 7.94 (d,  $^3J = 13.7$  Hz, 1H, H-1'), 7.56 (d,  $^3J = 13.7$  Hz, 1H, H-2'), 7.56–7.54 (m, 1H, H-2), 7.49–7.40 (m, 3H, H-3, H-4, H-5).

**<sup>13</sup>C NMR** (101 MHz, CDCl<sub>3</sub>):  $\delta$  [ppm] = 138.3 (d, C-2'), 137.6 (d, C-1'), 135.6 (s, C-3), 132.1 (d, C-4) 131.9 (s, C-1), 130.8 (d, C-5), 128.9 (d, C-2), 127.4 (d, C-6).

The analytical data match those reported in the literature.<sup>[8]</sup>

**(E)-3-(2'-Nitrovinyl)benzonitrile (1k)**

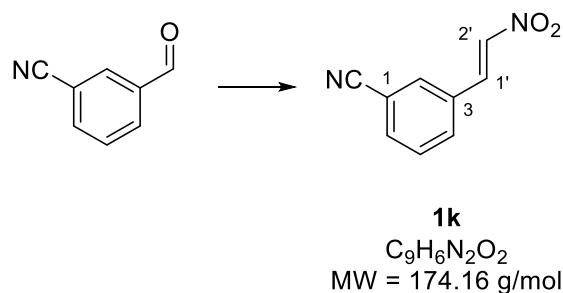

Following **GP 1**, a solution of freshly distilled 3-formylbenzonitrile (1.00 g, 7.63 mmol, 1.00 equiv), nitromethane (1.22 mL, 1.40 g, 22.9 mmol, 3.00 equiv) and NH<sub>4</sub>OAc (1.47 g, 19.1 mmol, 2.50 equiv) in glacial acetic acid (4 mL) was heated at reflux for six hours. The work-up was performed with dichloromethane (2 × 10 mL) as the solvent. The crude product was purified by column chromatography (5 × 15 cm, cHex/EtOAc = 20/1) to yield **1k** (720 mg, 4.13 mmol, 54%) as a beige coloured crystalline solid.

**TLC:**  $R_f = 0.59$  (cHex/EtOAc = 9/1) [UV, KMnO<sub>4</sub>].

**mp:** 123 °C.

**UV-Vis:**  $\epsilon_{293} = 16300$  ( $c = 1$  mM, CH<sub>2</sub>Cl<sub>2</sub>).

**<sup>1</sup>H NMR** (500 MHz, CDCl<sub>3</sub>):  $\delta$  [ppm] = 8.00 (d,  $^3J = 13.7$  Hz, 1H, H-1'), 7.86 (t,  $^4J = 1.7$  Hz, 1H, H-2), 7.81 (dd,  $^3J = 7.7$  Hz,  $^4J = 1.7$  Hz, 2H, H-4, H-6), 7.63 (t,  $^3J = 7.7$  Hz, 1H, H-5), 7.62 (d,  $^3J = 13.7$  Hz, 1H, H-2').

**<sup>13</sup>C NMR** (101 MHz, CDCl<sub>3</sub>):  $\delta$  [ppm] = 139.1 (d, C-1'), 136.4 (d, C-2'), 134.9 (d, C-4)\*, 132.8 (d, C-6)\*, 132.4 (d, C-2), 131.6 (s, C-1), 130.5 (d, C-5), 117.6 (s, C<sub>ar</sub>CN), 114.2 (s, C-3).

\*The assignments are interchangeable.

The analytical data match those reported in the literature.<sup>[9]</sup>

**(E)-1-Chloro-2-(2'-nitrovinyl)benzene (11)**

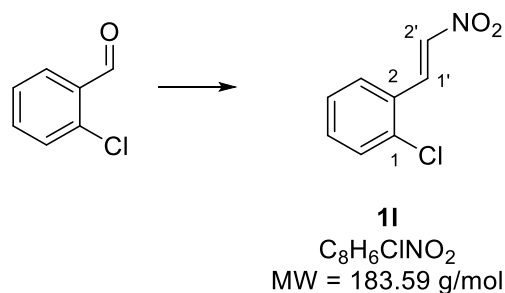

Following **GP 1**, a solution of freshly distilled 2-chlorobenzaldehyde (2.42 mL, 1.00 g, 21.3 mmol, 1.00 equiv), nitromethane (3.43 mL, 3.91 g, 64.0 mmol, 3.00 equiv) and  $NH_4OAc$  (4.11 g, 53.4 mmol, 2.50 equiv) in glacial acetic acid (10 mL) was heated at reflux for six hours. The work-up was performed with dichloromethane ( $2 \times 30$  mL) as the solvent. The crude product was purified by column chromatography ( $6 \times 12$  cm, cHex/EtOAc = 20/1) to yield **11** (1.51 g, 822  $\mu$ mol, 38%) as an orange coloured crystalline solid.

**TLC:**  $R_f = 0.21$  (cHex/EtOAc = 9/1) [UV,  $KMnO_4$ ].

**mp:** 48 °C.

**UV-Vis:**  $\epsilon_{305} = 14240$  ( $c = 1$  mM,  $CH_2Cl_2$ ).

**$^1H$  NMR** (300 MHz,  $CDCl_3$ ): 8.41 (d,  $^3J = 13.8$  Hz, 1H, H-1'), 7.59 (d,  $^3J = 13.8$  Hz, 1H, H-2), 7.61–7.57 (m, 1H, H-3), 7.53–7.48 (m, 1H, H-6), 7.46–7.39 (m, 1H, H-4), 7.37–7.31 (m, 1H, H-5).

**$^{13}C$  NMR** (101 MHz,  $CDCl_3$ ): 139.0 (d, C-1'), 136.2 (s, C-2), 135.2 (d, C-1'), 133.0 (d, C-4), 130.9 (d, C-6), 128.8 (d, C-3), 128.7 (s, C-1), 127.6 (d, C-5).

The analytical data match those reported in the literature.<sup>[8]</sup>

**(E)-2-(2'-Nitrovinyl)pyridine (1m)**

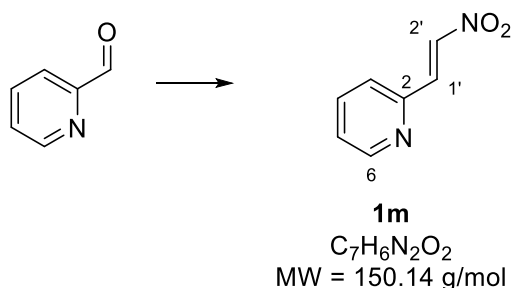

Following **GP 1**, a solution of picolinaldehyde (877  $\mu$ L, 1.00 g, 9.34 mmol, 1.00 equiv), NH<sub>4</sub>OAc (863 mg, 11.2 mmol, 1.20 equiv) and nitromethane (10.0 mL, 11.4 g, 187 mmol, 20.0 equiv) in glacial acetic acid (20 mL) was heated at reflux for five hours. The work-up was performed with ethyl acetate (2  $\times$  50 mL) as the solvent. The crude product was purified by column chromatography (4  $\times$  15 cm, CH<sub>2</sub>Cl<sub>2</sub>/MeOH = 99/1  $\rightarrow$  95/5) to yield **1m** (300 mg, 1.99 mmol, 21%) as a brown coloured crystalline solid.

**TLC:**  $R_f$  = 0.21 (CH<sub>2</sub>Cl<sub>2</sub>/MeOH = 99/1) [UV, KMnO<sub>4</sub>].

**mp:** 118  $^{\circ}$ C.

**UV-Vis:**  $\epsilon_{304}$  = 15580 ( $c$  = 1 mM, CH<sub>2</sub>Cl<sub>2</sub>).

**<sup>1</sup>H NMR** (500 MHz, CDCl<sub>3</sub>):  $\delta$  [ppm] = 8.80 (d,  $^3J$  = 2.3 Hz, 1H, H-3), 8.72 (dd,  $^3J$  = 4.9 Hz,  $^4J$  = 1.6 Hz, 1H, H-6), 8.01 (d,  $^3J$  = 13.8 Hz, 1H, H-1'), 7.87 (*virt. dt*,  $^3J$  = 8.0 Hz,  $^3J \cong ^4J$  = 1.9 Hz, 1H, H-4), 7.63 (d,  $^3J$  = 13.8 Hz, 1H, H-2'), 7.42 (ddd,  $^3J$  = 8.0, 4.9 Hz, 1H, H-5).

**<sup>13</sup>C NMR** (75 MHz, CDCl<sub>3</sub>):  $\delta$  [ppm] = 152.7 (d, C-6), 150.4 (d, C-3), 138.4 (d, C-2'), 135.4 (d, C-1'), 135.2 (d, C-4), 126.3 (s, C-2) 124.1 (d, C-5).

The analytical data match those reported in the literature.<sup>[6]</sup>

**(E)-2-(2'-Nitrovinyl)naphthalene (1n)**

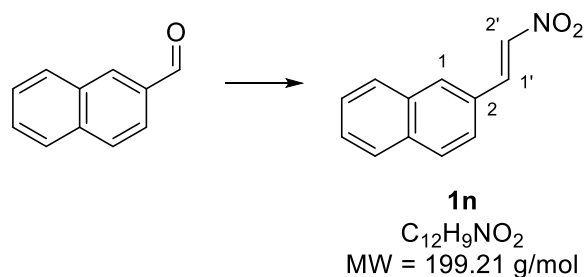

Following **GP 1**, a solution of 2-naphthaldehyde (1.00 g, 6.40 mmol, 1.00 equiv), NH<sub>4</sub>OAc (592 mg, 7.68 mmol, 1.20 equiv) and nitromethane (12.0 mL, 13.7 mg, 224 mmol, 35.0 equiv) in glacial acetic acid (20 mL) was heated at reflux for five hours. The work-up was performed with ethyl acetate (2 × 50 mL) as the solvent. The crude product was purified by column chromatography (3 × 12 cm, CH<sub>2</sub>Cl<sub>2</sub>) to yield **1n** (1.10 g, 5.52 mmol, 86%) as a dark yellow coloured crystalline solid.

**TLC:**  $R_f = 0.81$  (CH<sub>2</sub>Cl<sub>2</sub>) [UV].

**mp:** 117 °C.

**UV-Vis:**  $\epsilon_{330} = 21770$  ( $c = 1$  mM, CH<sub>2</sub>Cl<sub>2</sub>).

**<sup>1</sup>H NMR** (500 MHz, CDCl<sub>3</sub>):  $\delta$  [ppm] = 8.17 (d,  $^3J = 13.7$  Hz, 1H, C-1'), 8.03 (br. s, 1H, H-1), 7.92–7.84 (m, 3H, H<sub>ar</sub>)\*, 7.71 (d,  $^3J = 13.7$  Hz, 1H, C-2'), 7.62–7.54 (m, 3H, H<sub>ar</sub>)\*.

**<sup>13</sup>C NMR** (101 MHz, CDCl<sub>3</sub>):  $\delta$  [ppm] = 139.4 (d, C-1'), 137.3 (d, C-2'), 135.1 (s, C-8a), 133.3 (s, C-4a), 132.4 (d, C-1), 129.5 (d, C<sub>ar</sub>H)\*, 128.9 (d, C<sub>ar</sub>H)\*, 128.5 (d, C<sub>ar</sub>H)\*, 128.1 (d, C<sub>ar</sub>H)\*, 127.7 (s, C-2), 127.4 (d, C<sub>ar</sub>H)\*, 123.5 (d, C<sub>ar</sub>H)\*.

\* The exact assignment of these signals was not possible.

The analytical data match those reported in the literature.<sup>[7]</sup>



### Benzaldehyde-2,3,4,5,6-*d*<sub>5</sub>

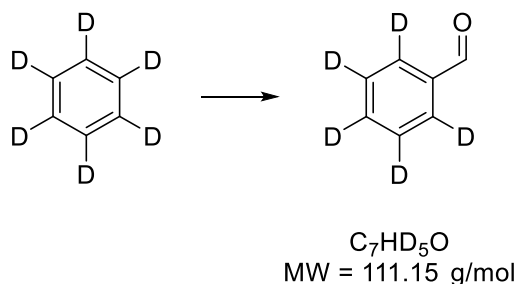

According to a literature known procedure:<sup>[10]</sup> A solution of benzene-*d*<sub>6</sub> (1.05 mL, 1.00 g, 11.9 mmol, 1.00 equiv) in dichloromethane (20 mL) was cooled to 0 °C. TiCl<sub>4</sub> (2.65 mL, 4.51 g, 23.8 mmol, 2.00 equiv; 1 M solution in CH<sub>2</sub>Cl<sub>2</sub>) was added slowly. The yellow coloured solution was stirred for five minutes, and freshly distilled dichloromethylmethylether (1.08 mL, 1.37 g, 11.9 mmol, 1.00 equiv) was added dropwise. The reaction solution was stirred for 20 minutes at 0 °C, warmed to room temperature and was stirred at this temperature for further 60 minutes. The reaction mixture was poured onto ice water (50 mL) and was subsequently partitioned between water and dichloromethane (50 mL). The aqueous layer was extracted with dichloromethane (2 × 50 mL). The combined organic layers were washed consecutively with saturated aqueous NaHCO<sub>3</sub> solution (150 mL) and saturated aqueous NaCl solution (150 mL), dried over Na<sub>2</sub>SO<sub>4</sub>, filtered and concentrated *in vacuo* (note: due to the volatility of the product, the vacuum should not exceed 200 mbar!). The crude product was purified by column chromatography (4 × 15 cm, P/Et<sub>2</sub>O = 5/1) to yield benzaldehyde-2,3,4,5,6-*d*<sub>5</sub> (660 mg, 5.94 mmol, 50%) as a colorless liquid.

**TLC:**  $R_f = 0.54$  (P/Et<sub>2</sub>O = 2/1) [UV, KMnO<sub>4</sub>].

**<sup>1</sup>H NMR** (300 MHz, CDCl<sub>3</sub>):  $\delta$  [ppm] = 10.0 (s, 1H, ArCHO).

**<sup>13</sup>C NMR** (75 MHz, CDCl<sub>3</sub>):  $\delta$  [ppm] = 171.9 (d, CHO).

The analytical data match those reported in the literature.<sup>[10]</sup>

**(E)-1-(2'-Nitrovinyl)benzene-2,3,4,5,6-*d*<sub>5</sub> (1a-*d*<sub>5</sub>)**

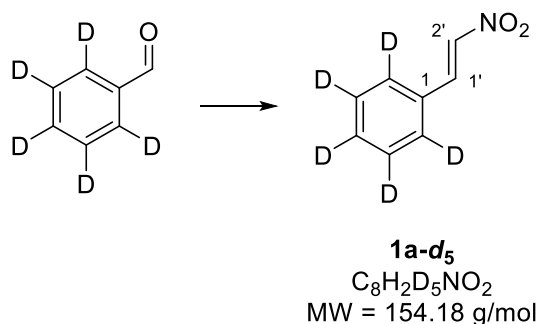

Following **GP 1**, a solution of benzaldehyde-2,3,4,5,6-*d*<sub>5</sub> (200 mg, 1.80 mmol, 1.00 equiv), NH<sub>4</sub>OAc (166 mg, 2.16 mmol, 1.20 equiv) and nitromethane (3.37 mL, 3.84 g, 63.0 mmol, 35.0 equiv) in glacial acetic acid (5 mL) was heated at reflux for five hours. The work-up was performed with ethyl acetate (2 × 50 mL) as the solvent. The crude product was purified by column chromatography (3 × 15 cm, P/Et<sub>2</sub>O = 5/1) to yield **1a-*d*<sub>5</sub>** (115 mg, 74.6 μmol, 42%) as yellow coloured needles.

**TLC:** *R*<sub>f</sub> = 0.56 (P/Et<sub>2</sub>O = 20/1) [UV, KMnO<sub>4</sub>].

**mp:** 56 °C.

**IR** (ATR):  $\tilde{\nu}$  [cm<sup>-1</sup>] = 3109 (w), 1629 (m, R<sub>2</sub>C=CR<sub>2</sub>), 1506 (s, C-NO<sub>2</sub>), 1490 (s), 1331 (s, C-NO<sub>2</sub>), 1241 (m), 1160 (m), 973 (s), 960 (s), 845 (s).

**MS** (EI, 70 eV): *m/z* (%) = 154 (86) [M]<sup>+</sup>, 108 (96) [M-NO<sub>2</sub>]<sup>+</sup>, 96 (100) [C<sub>7</sub>H<sub>2</sub>D<sub>5</sub>]<sup>+</sup>, 81 (67) [C<sub>6</sub>D<sub>5</sub>]<sup>+</sup>.

**<sup>1</sup>H NMR** (300 MHz, CDCl<sub>3</sub>):  $\delta$  [ppm] = 8.04 (d, <sup>3</sup>*J* = 13.7 Hz, 1H, H-1'), 7.61 (d, <sup>3</sup>*J* = 13.7 Hz, 1H, H-2').

**<sup>13</sup>C NMR** (101 MHz, CDCl<sub>3</sub>):  $\delta$  [ppm] = 139.1 (d, C-1'), 137.3 (d, C-2'), 131.8 (t, <sup>1</sup>*J*<sub>CD</sub> = 24.4 Hz, C<sub>ar</sub>D-4), 130.1 (s, C-1), 129.0 (t, 2C, <sup>1</sup>*J*<sub>CD</sub> = 24.7 Hz, C<sub>ar</sub>D-3, C<sub>ar</sub>D-5)\*, 128.9 (t, 2C, <sup>1</sup>*J*<sub>CD</sub> = 24.3 Hz, C<sub>ar</sub>D-2, C<sub>ar</sub>D-6)\*.

\* The assignment is interconvertible.

## 2-(Pent-4'-en-1'-yl)benzaldehyde

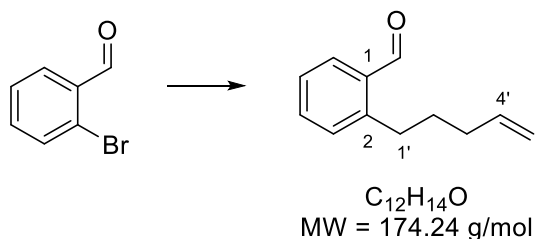

According to a modified literature known procedure:<sup>[11]</sup> The *Grignard* reagent was prepared freshly from activated magnesia (310 mg, 12.8 mmol, 0.95 equiv) and 5-bromopent-1-ene (1.50 mL, 2.00 g, 13.4 mmol, 1.00 equiv) in tetrahydrofuran (13.5 mL). A solution of  $ZnCl_2$  (1.77 g, 13.0 mmol, 2.00 equiv) in tetrahydrofuran (12 mL) was added slowly to the stirred solution of the *Grignard* reagent and the reaction solution was stirred at room temperature for 30 minutes. In parallel, 2-(bromomethyl) benzaldehyde (1.20 g, 6.49 mmol, 1.00 equiv) was added to a stirred solution of  $Pd_2(dba)_3$  (297 mg, 324  $\mu$ mol, 0.05 equiv) and RuPhos (453 mg, 971  $\mu$ mol, 0.10 equiv) in tetrahydrofuran (10 mL). The solution of the aldehyde was added dropwise to the solution of the *Grignard* reagent, resulting in an exothermic reaction. The reaction solution was stirred at room temperature overnight. Saturated aqueous  $NH_4Cl$  solution (30 mL) was added to quench the reaction and the reaction mixture was partitioned between the aqueous and the organic layer. The aqueous layer was extracted with diethyl ether ( $3 \times 30$  mL), dried over  $Na_2SO_4$ , filtered and concentrated *in vacuo*. The crude product was purified by column chromatography ( $5 \times 10$  cm, P/Et<sub>2</sub>O = 19/1) to yield 2-(Pent-4'-en-1'-yl)benzaldehyde (482 mg, 2.77 mmol, 43%) as a pale-yellow coloured oil.

**TLC:**  $R_f = 0.44$  (P/Et<sub>2</sub>O = 9/1) [UV,  $KMnO_4$ ].

**<sup>1</sup>H NMR** (500 MHz,  $CDCl_3$ ):  $\delta$  [ppm] = 10.3 (s, 1H, ArCHO), 7.83 (dd,  $^3J = 7.5$  Hz,  $^4J = 1.5$  Hz, 1H, H<sub>ar</sub>)\*, 7.50 (td,  $^3J = 7.5$  Hz,  $^4J = 1.5$  Hz, 1H, H<sub>ar</sub>)\*, 7.37 (td,  $^3J = 7.5$  Hz,  $^4J = 1.2$  Hz, 1H, H<sub>ar</sub>)\*, 7.28 (dd,  $^3J = 7.5$  Hz,  $^4J = 1.2$  Hz, 1H, H<sub>ar</sub>)\*, 5.84 (ddt,  $^3J = 17.0$  Hz, 10.2 Hz, 6.7 Hz, 1H, H-4'), 5.04 (*virt. dq*,  $^3J = 17.0$  Hz,  $^2J \cong ^4J = 1.7$  Hz, 1H, CHH-5'), 5.00 (ddt,  $^2J = 2.3$  Hz,  $^3J = 10.2$  Hz,  $^4J = 1.3$  Hz, 1H, CHH-5'), 3.10–3.00 (m, 2H, CH<sub>2</sub>-1'), 2.21–2.09 (m, 2H, CH<sub>2</sub>-3'), 1.78–1.67 (m, 2H, CH<sub>2</sub>-2').

**<sup>13</sup>C NMR** (75 MHz,  $CDCl_3$ ):  $\delta$  [ppm] = 192.5 (d, CHO), 145.7 (s, C-1), 138.8 (d, C-4'), 133.0 (d, C<sub>ar</sub>H)\*, 131.4 (d, C<sub>ar</sub>H)\*, 128.2 (s, C-2), 126.6 (d, C<sub>ar</sub>H)\*, 126.1 (d, C<sub>ar</sub>H)\*, 114.8 (t, C-5'), 32.0 (t, C-3'), 31.0 (t, C-1'), 26.0 (t, C-2').

\* The exact assignment of these signals was not possible.

The analytical data match those reported in the literature.<sup>[12]</sup>

**(E)-1-(2''-Nitrovinyl)-2-(pent-4'-en-1'-yl)benzene (1o)**

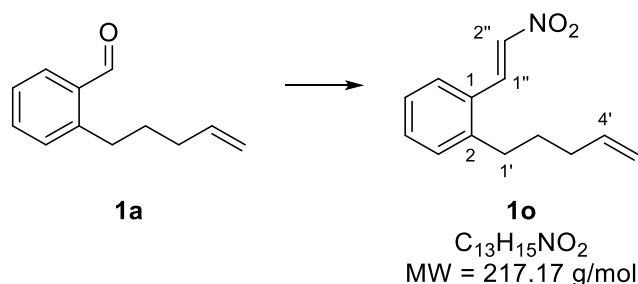

Following **GP 1**, a solution of 2-(pent-4-en-1-yl)benzaldehyde (200 mg, 1.15 mmol, 1.00 equiv),  $NH_4OAc$  (84.1 mg, 1.09 mmol, 0.95 equiv) and nitromethane (2.34 mL, 2.66 g, 43.6 mmol, 38.0 equiv) in glacial acetic acid (5 mL) was heated at reflux for five hours. The work-up was performed with ethyl acetate ( $2 \times 50$  mL) as the solvent. The crude product was purified by column chromatography ( $3 \times 15$  cm, P/E = 19/1) to yield **1o** (157 mg, 7.23 mmol, 63%) as a yellow coloured oil.

**TLC:**  $R_f = 0.64$  (P/E = 9/1) [UV,  $KMnO_4$ ].

**UV-Vis:**  $\epsilon_{323} = 18850$  ( $c = 1$  mM,  $CH_2Cl_2$ ).

**IR** (ATR):  $\tilde{\nu}$  [ $cm^{-1}$ ] = 3072 (w,  $C_{ar-H}$ ), 2935 (w, C-H), 2869 (w, C-H), 1629 (m,  $-CH=CH-Ar$ ), 1510 (s, C- $NO_2$ ), 1482 (m), 1336 (vs, C- $NO_2$ ), 991 (w), 962 [s, (*E*)- $CH=CH-R$ ], 912 (m, R- $CH-CH_2$ ), 839 (m,  $C_{ar-H}$ ), 760 (m,  $C_{ar-H}$ ).

**MS** (EI, 70 eV):  $m/z$  (%) = 171 (43) [ $C_{13}H_{15}$ ]<sup>+</sup>, 129 (100) [ $C_{10}H_9$ ]<sup>+</sup>, 115 (84) [ $C_9H_7$ ]<sup>+</sup>, 91 (13) [ $C_7H_7$ ]<sup>+</sup>.

**HRMS** (ESI): calcd for  $C_{13}H_{16}NO_2^+$  [ $M+H$ ]<sup>+</sup>: 218.1176; found: 218.1176.

**<sup>1</sup>H NMR** (500 MHz,  $CDCl_3$ ):  $\delta$  [ppm] = 8.33 (d,  $^3J = 13.5$  Hz, 1H, H-1''), 7.55–7.48 (m, 2H, H-2,  $H_{ar}^*$ ), 7.43–7.40 (m, 1H,  $H_{ar}^*$ ), 7.29–7.25 (m, 2H,  $H_{ar}^*$ ), 5.83 (ddt,  $^3J = 16.9$  Hz, 10.2 Hz, 6.6 Hz, 1H, H-4'), 5.09–5.00 (m, 2H,  $CH_2-5'$ ), 2.83–2.76 (m, 2H,  $CH_2-1'$ ), 2.14 (*virt. q*,  $^3J \cong ^3J = 7.0$  Hz, 2H,  $CH_2-3'$ ), 1.75–1.65 (m, 2H,  $CH_2-2'$ ).

**<sup>13</sup>C NMR** (101 MHz, CDCl<sub>3</sub>): δ [ppm] = 143.9 (s, C-1), 138.0 (d, C-2''), 137.9 (d, C-4'), 136.7 (d, C-1''), 132.1 (d, C<sub>ar</sub>H)\*, 130.8 (d, C<sub>ar</sub>H)\*, 128.5 (s, C-2), 127.4 (d, C<sub>ar</sub>H)\*, 127.0 (d, C<sub>ar</sub>H)\*, 115.6 (t, C-5'), 32.8 (t, C-3'), 31.0 (t, C-1'), 25.7 (t, C-2').

\* The exact assignment of these signals was not possible.

#### 4. [2+2] photocycloaddition of nitroethenes **1a-1o** to 2,3-dimethyl-2-butene

The analytical data for nitrocyclobutanes **2a-2e** have already been published in a communication.<sup>[2]</sup>

##### General Procedure 4 (GP 4) for the [2+2] photocycloaddition of nitroethenes with 2,3-dimethylbut-2-ene

A solution of the nitroethene (1.00 equiv) and 2,3-dimethyl-2-butene (10.0 equiv) in dichloromethane ( $c = 20$  mM) was irradiated with visible light (the wavelength  $\lambda$  [nm] of the light source is indicated for each reaction individually) at room temperature or at  $-78$  °C. The progress of the reaction was monitored by TLC. After full conversion was reached, irradiation was stopped, and the solvent was removed *in vacuo*. In some cases, the reaction was stopped when the TLC did not indicate any further consumption of the starting material over a period of two to three hours. The crude product was dry loaded onto CELITE<sup>®</sup> and purified by column chromatography.

##### (2',2',3',3'-Tetramethyl-4'-nitrocyclobutyl)benzene (**2a**)

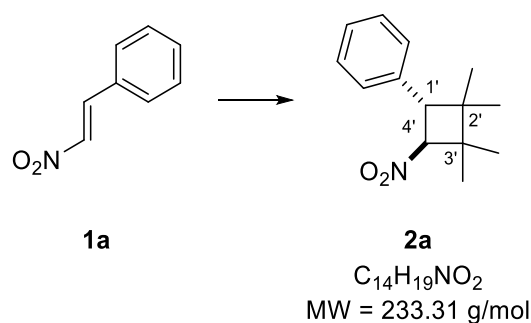

**Conditions A:** Following **GP 4**, a solution of nitroethene **1a** (29.8 mg, 200  $\mu$ mol, 1.00 equiv) and 2,3-dimethyl-2-butene (234  $\mu$ L, 166 mg, 2.00 mmol, 10.0 equiv) in dichloromethane (10 mL) was irradiated at  $\lambda = 419$  nm (fluorescent lamps) for twelve hours at room temperature. The crude product was purified by column chromatography ( $2 \times 12$  cm, P/Et<sub>2</sub>O = 20/1) to yield **2a** (26.9 mg, 1.16 mmol, 59%) as a yellow coloured oil.

**Conditions B:** Following **GP 4**, a solution of nitroethene **1a** (14.9 mg, 100  $\mu$ mol, 1.00 equiv) and 2,3-dimethyl-2-butene (119  $\mu$ L, 84.1 mg, 1.00 mmol, 10.0 equiv) in dichloromethane (5 mL) was irradiated at  $\lambda = 424$  nm (LED) for twelve hours at room temperature. The crude

product was purified by column chromatography ( $2 \times 10$  cm, P/Et<sub>2</sub>O = 20/1) to yield **2a** (12.2 mg, 52.3  $\mu$ mol, 53%) as a yellow coloured oil.

**Conditions C:** Following **GP 4**, a solution of nitroethene **1a** (14.9 mg, 100  $\mu$ mol, 1.00 equiv) and 2,3-dimethyl-2-butene (119  $\mu$ L, 84.1 mg, 1.00 mmol, 10.0 equiv) in dichloromethane (5 mL) was irradiated at  $\lambda = 424$  nm (LED) for twelve hours at  $-78$  °C. The crude product was purified by column chromatography ( $2 \times 10$  cm, P/Et<sub>2</sub>O = 20/1) to yield **2a** (13.0 mg, 55.7  $\mu$ mol, 56%) as a yellow coloured oil.

**Reaction at  $\lambda = 382$  nm (LED):** Following **GP 4**, a solution of nitroethene **1a** (14.9 mg, 100  $\mu$ mol, 1.00 equiv) and 2,3-dimethyl-2-butene (119  $\mu$ L, 84.1 mg, 1.00 mmol, 10.0 equiv) in dichloromethane (5 mL) was irradiated at  $\lambda = 382$  nm (LED) for three hours at room temperature. The crude product was purified by column chromatography ( $2 \times 12$  cm, P/Et<sub>2</sub>O = 20/1) to yield **2a** (13.2 mg, 56.6  $\mu$ mol, 57%) as a yellow coloured oil.

The analytical data match those reported in the literature.<sup>[12]</sup>

#### 1-Methyl-4-(2',2',3',3'-tetramethyl-4'-nitrocyclobutyl)benzene (**2b**)

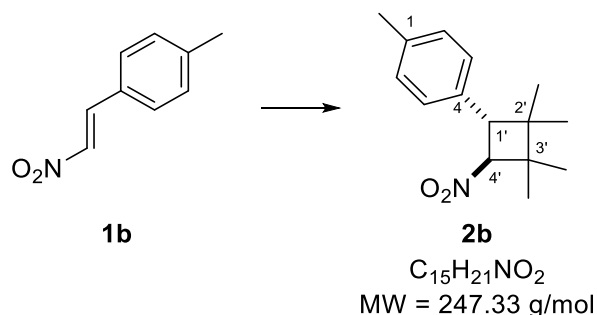

**Conditions A:** Following **GP 4**, a solution of nitroethene **1b** (32.6 mg, 200  $\mu$ mol, 1.00 equiv) and 2,3-dimethyl-2-butene (237  $\mu$ L, 168 mg, 2.00 mmol, 10.0 equiv) in dichloromethane (10 mL) was irradiated at  $\lambda = 419$  nm (fluorescent lamps) for three hours at room temperature. The crude product was purified by column chromatography ( $2 \times 12$  cm, P/Et<sub>2</sub>O = 20/1) to yield **2b** (26.9 mg, 1.09 mmol, 54%) as a pale-yellow coloured oil.

**Conditions B:** Following **GP 4**, a solution of nitroethene **1b** (16.3 mg, 100  $\mu$ mol, 1.00 equiv) and 2,3-dimethyl-2-butene (119  $\mu$ L, 84.1 mg, 1.00 mmol, 10.0 equiv) in dichloromethane (5 mL) was irradiated at  $\lambda = 424$  nm (LED) for three hours at room temperature. The crude product was purified by column chromatography ( $2 \times 10$  cm, P/Et<sub>2</sub>O = 20/1) to yield **2b** (16.7 mg, 67.5  $\mu$ mol, 68%) as a pale-yellow coloured oil.

**Conditions C:** Following **GP 4**, a solution of nitroethene **1b** (16.3 mg, 100  $\mu\text{mol}$ , 1.00 equiv) and 2,3-dimethyl-2-butene (119  $\mu\text{L}$ , 84.1 mg, 1.00 mmol, 10.0 equiv) in dichloromethane (5 mL) was irradiated at  $\lambda = 424$  nm (LED) for three hours at  $-78$   $^{\circ}\text{C}$ . The crude product was purified by column chromatography ( $2 \times 10$  cm, P/Et<sub>2</sub>O = 20/1) to yield **2b** (16.5 mg, 66.7  $\mu\text{mol}$ , 67%) as a pale-yellow coloured oil.

The analytical data match those reported in the literature.<sup>[12]</sup>

### 1-Methoxy-4-(2',2',3',3'-tetramethyl-4'-nitrocyclobutyl)benzene (**2c**)

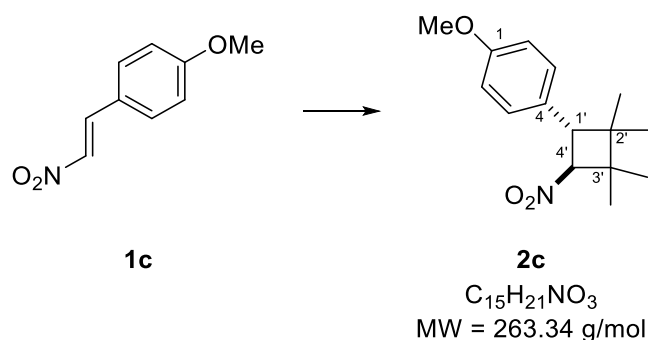

**Conditions A:** Following **GP 4**, a solution of nitroethene **1c** (35.8 mg, 200  $\mu\text{mol}$ , 1.00 equiv) and 2,3-dimethyl-2-butene (237  $\mu\text{L}$ , 168 mg, 2.00 mmol, 10.0 equiv) in dichloromethane (10 mL) was irradiated at  $\lambda = 419$  nm (fluorescent lamps) for four hours at room temperature. The crude product was purified by column chromatography ( $2 \times 12$  cm, P/Et<sub>2</sub>O = 9/1) to yield **2c** (27.3 mg, 1.04 mmol, 52%) as a yellow coloured oil.

**Conditions B:** Following **GP 4**, a solution of nitroethene **1c** (17.9 mg, 100  $\mu\text{mol}$ , 1.00 equiv) and 2,3-dimethyl-2-butene (119  $\mu\text{L}$ , 84.1 mg, 1.00 mmol, 10.0 equiv) in dichloromethane (5 mL) was irradiated at  $\lambda = 424$  nm (LED) for three hours at room temperature. The crude product was purified by column chromatography ( $2 \times 10$  cm, P/Et<sub>2</sub>O = 9/1) to yield **2c** (14.3 mg, 54.3  $\mu\text{mol}$ , 58%) as a yellow coloured oil.

**Conditions C:** Following **GP 4**, a solution of nitroethene **1c** (17.9 mg, 100  $\mu\text{mol}$ , 1.00 equiv) and 2,3-dimethyl-2-butene (119  $\mu\text{L}$ , 84.1 mg, 1.00 mmol, 10.0 equiv) in dichloromethane (5 mL) was irradiated at  $\lambda = 424$  nm (LED) for three hours at  $-78$   $^{\circ}\text{C}$ . The crude product was purified by column chromatography ( $2 \times 10$  cm, P/Et<sub>2</sub>O = 9/1) to yield **2c** (20.3 mg, 77.1  $\mu\text{mol}$ , 77%) as a yellow coloured oil.



The analytical data match those reported in the literature.<sup>[12]</sup>

#### 4-(2',2',3',3'-Tetramethyl-4'-nitrocyclobutyl)benzonitrile (**2d**)

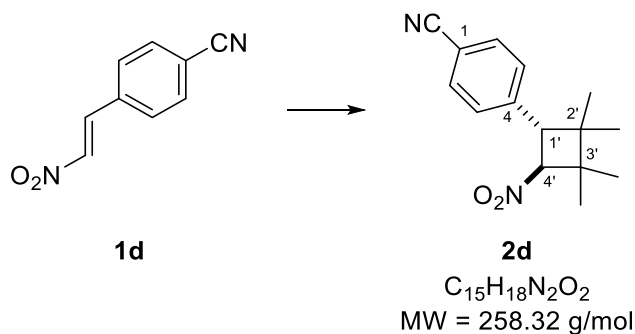

**Conditions A:** Following **GP 4**, a solution of nitroethene **1d** (34.8 mg, 200  $\mu$ mol, 1.00 equiv) and 2,3-dimethyl-2-butene (237  $\mu$ L, 168 mg, 2.00 mmol, 10.0 equiv) in dichloromethane (10 mL) was irradiated at  $\lambda = 419$  nm (fluorescent lamps) for five hours at room temperature. The crude product was purified by column chromatography (2  $\times$  15 cm, P/Et<sub>2</sub>O = 9/1) to yield **2d** (15.7 mg, 60.8  $\mu$ mol, 31%) and the side product (2.64 mg, 10.2  $\mu$ mol, 5%) each as a colorless solid.

**Conditions B:** Following **GP 4**, a solution of nitroethene **1d** (17.4 mg, 100  $\mu$ mol, 1.00 equiv) and 2,3-dimethyl-2-butene (119  $\mu$ L, 84.1 mg, 1.00 mmol, 10.0 equiv) in dichloromethane (5 mL) was irradiated at  $\lambda = 424$  nm (LED) for four hours at room temperature. The crude product was purified by column chromatography (2  $\times$  10 cm, P/Et<sub>2</sub>O = 9/1) to yield **2d** (6.70 mg, 25.9  $\mu$ mol, 26%) and the side product (0.9 mg, 3.48  $\mu$ mol, 3%) each as a colorless solid.

**Conditions C:** Following **GP 4**, a solution of nitroethene **1d** (17.4 mg, 100  $\mu$ mol, 1.00 equiv) and 2,3-dimethyl-2-butene (119  $\mu$ L, 84.1 mg, 1.00 mmol, 10.0 equiv) in dichloromethane (5 mL) was irradiated at  $\lambda = 424$  nm (LED) for four hours at  $-78$  °C. The crude product was purified by column chromatography (2  $\times$  10 cm, P/Et<sub>2</sub>O = 9/1) to yield **2d** (11.4 mg, 43.9  $\mu$ mol, 44%) as colorless solid. The side product was only observed in traces.

The analytical data match those reported in the literature.<sup>[12]</sup>

## 2-(2',2',3',3'-Tetramethyl-4'-nitrocyclobutyl)thiophene (**2e**)

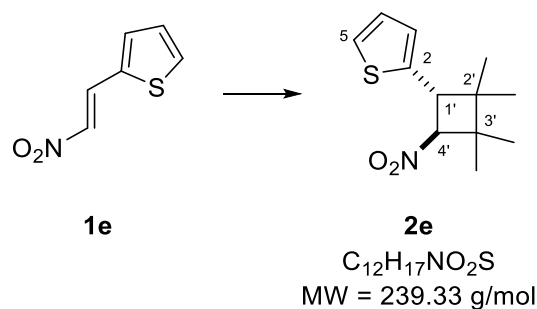

**Conditions A:** Following **GP 4**, a solution of nitroethene **1e** (31.0 mg, 200  $\mu$ mol, 1.00 equiv) and 2,3-dimethyl-2-butene (237  $\mu$ L, 168 mg, 2.00 mmol, 10.0 equiv) in dichloromethane (10 mL) was irradiated at  $\lambda = 419$  nm (fluorescent lamps) for two hours at room temperature. The crude product was purified by column chromatography (2  $\times$  12 cm, P/Et<sub>2</sub>O = 19/1) to yield **2e** (23.8 mg, 99.4  $\mu$ mol, 50%) as a yellow coloured oil.

**Conditions B:** Following **GP 4**, a solution of nitroethene **1e** (15.5 mg, 100  $\mu$ mol, 1.00 equiv) and 2,3-dimethyl-2-butene (119  $\mu$ L, 84.1 mg, 1.00 mmol, 10.0 equiv) in dichloromethane (5 mL) was irradiated at  $\lambda = 424$  nm (LED) for two hours at room temperature. The crude product was purified by column chromatography (2  $\times$  10 cm, P/Et<sub>2</sub>O = 19/1) to yield **2e** (12.1 mg, 50.6  $\mu$ mol, 51%) as a yellow coloured oil.

**Conditions C:** Following **GP 4**, a solution of nitroethene **1e** (15.5 mg, 100  $\mu$ mol, 1.00 equiv) and 2,3-dimethyl-2-butene (119  $\mu$ L, 84.1 mg, 1.00 mmol, 10.0 equiv) in dichloromethane (5 mL) was irradiated at  $\lambda = 424$  nm (LED) for two hours at  $-78$  °C. The crude product was purified by column chromatography (2  $\times$  10 cm, P/Et<sub>2</sub>O = 19/1) to yield **2e** (20.5 mg, 85.7  $\mu$ mol, 86%) as a yellow coloured oil.

The analytical data match those reported in the literature.<sup>[12]</sup>

### 1-Fluoro-4-(2',2',3',3'-tetramethyl-4'-nitrocyclobutyl)benzene (**2f**)

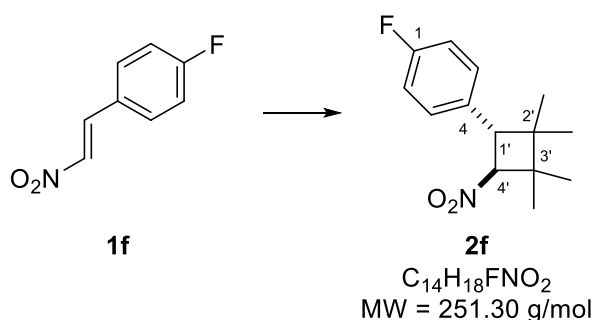

**Conditions A:** Following **GP 4**, a solution of nitroethene **1f** (33.4 mg, 200  $\mu$ mol, 1.00 equiv) and 2,3-dimethyl-2-butene (237  $\mu$ L, 168 mg, 2.00 mmol, 10.0 equiv) in dichloromethane (10 mL) was irradiated at  $\lambda = 419$  nm (fluorescent lamps) for four hours at room temperature. The crude product was purified by column chromatography (2  $\times$  15 cm, P/Et<sub>2</sub>O = 19/1) to yield **2f** (22.2 mg, 88.3  $\mu$ mol, 44%) as a colorless solid.

**Conditions B:** Following **GP 4**, a solution of nitroethene **1f** (16.7 mg, 100  $\mu$ mol, 1.00 equiv) and 2,3-dimethyl-2-butene (119  $\mu$ L, 84.1 mg, 1.00 mmol, 10.0 equiv) in dichloromethane (5 mL) was irradiated at  $\lambda = 424$  nm (LED) for four hours at room temperature. The crude product was purified by column chromatography (2  $\times$  15 cm, P/Et<sub>2</sub>O = 19/1) to yield **2f** (10.5 mg, 41.8  $\mu$ mol, 42%) as a colorless solid.

**Conditions C:** Following **GP 4**, a solution of nitroethene **1f** (16.7 mg, 100  $\mu$ mol, 1.00 equiv) and 2,3-dimethyl-2-butene (119  $\mu$ L, 84.1 mg, 1.00 mmol, 10.0 equiv) in dichloromethane (5 mL) was irradiated at  $\lambda = 424$  nm (LED) for four hours at  $-78$  °C. The crude product was purified by column chromatography (2  $\times$  20 cm, P/Et<sub>2</sub>O = 15/1) to yield **2f** (12.6 mg, 50.1  $\mu$ mol, 50%) as a colorless solid

**TLC:**  $R_f = 0.53$  (P/Et<sub>2</sub>O = 9/1) [UV, KMnO<sub>4</sub>].

**IR** (ATR):  $\tilde{\nu}$  [cm<sup>-1</sup>] = 3079 (w, C<sub>ar</sub>-H), 2967 (m, C<sub>ar</sub>-H), 2871 (w), 1538 (vs, C-NO<sub>2</sub>), 1510 (s), 1460 (m, C<sub>sp3</sub>-H), 1371 (s, C-NO<sub>2</sub>), 1226 (s, C<sub>ar</sub>-F), 1151 (m), 1135 (m), 844 (s, C<sub>ar</sub>-H), 761 (s, C<sub>ar</sub>-H).

**MS** (EI):  $m/z$  (%) = 205 (45) [M-NO<sub>2</sub>]<sup>+</sup>, 163 (100) [M-NO<sub>2</sub>-C<sub>3</sub>H<sub>6</sub>]<sup>+</sup>, 106 (54) [C<sub>7</sub>H<sub>6</sub>F]<sup>+</sup>.

**HRMS** (EI, 70 eV): calcd for C<sub>14</sub>H<sub>18</sub>FNO<sub>2</sub><sup>+</sup> [M]<sup>+</sup>: 251.1316; found: 251.1316.

**<sup>1</sup>H NMR** (400 MHz, CDCl<sub>3</sub>): δ [ppm] = 7.09–7.00 (m, 4H, H<sub>ar</sub>), 4.85 (d, <sup>3</sup>J = 10.1 Hz, 1H, H-4'), 3.92 (d, <sup>3</sup>J = 10.1 Hz, 1H, H-1'), 1.24 (s, 3H, CH<sub>3</sub>-2'), 1.16 (s, 3H, CH<sub>3</sub>-3'), 1.14 (s, 3H, CH<sub>3</sub>-2'), 0.70 (s, 3H, CH<sub>3</sub>-3').

**<sup>13</sup>C NMR** (101 MHz, CDCl<sub>3</sub>): δ [ppm] = 162.1 (d, <sup>1</sup>J<sub>CF</sub> = 254.4 Hz, C-1), 132.2 (s, C-4), 128.5 (d, <sup>3</sup>J<sub>CF</sub> = 7.9 Hz, C-3, C-5), 115.6 (d, <sup>2</sup>J<sub>CF</sub> = 21.4 Hz, C-2, C-6), 85.2 (d, C-4'), 48.9 (d, C-1'), 45.0 (s, C-3'), 39.3 (s, C-2'), 24.2 [q, (C-3')CH<sub>3</sub>], 22.8 [q, (C-2')CH<sub>3</sub>], 21.4 [q, (C-3')CH<sub>3</sub>], 19.4 [q, (C-2')CH<sub>3</sub>].

### 1-Chloro-4-(2',2',3',3'-tetramethyl-4'-nitrocyclobutyl)benzene (**2g**)

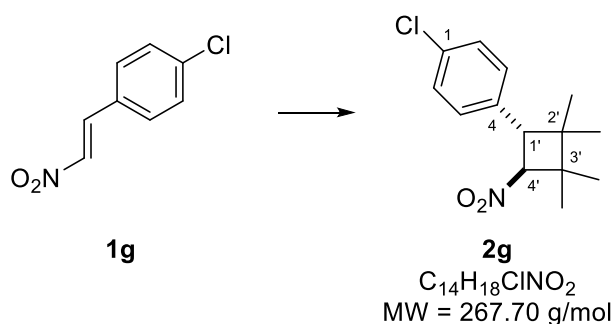

**Conditions A:** Following **GP 4**, a solution of nitroethene **1g** (36.7 mg, 200 μmol, 1.00 equiv) and 2,3-dimethyl-2-butene (237 μL, 168 mg, 2.00 mmol, 10.0 equiv) in dichloromethane (10 mL) was irradiated at λ = 419 nm (fluorescent lamps) for four hours at room temperature. The crude product was purified by column chromatography (2 × 12 cm, P/Et<sub>2</sub>O = 19/1) to yield **2g** (26.5 mg, 99.0 μmol, 49%) as a pale-yellow coloured solid.

**Conditions B:** Following **GP 4**, a solution of nitroethene **1g** (18.3 mg, 100 μmol, 1.00 equiv) and 2,3-dimethyl-2-butene (119 μL, 84.1 mg, 1.00 mmol, 10.0 equiv) in dichloromethane (5 mL) was irradiated at λ = 424 nm (LED) for four hours at room temperature. The crude product was purified by column chromatography (2 × 10 cm, P/Et<sub>2</sub>O = 19/1) to yield **2g** (11.5 mg, 43.0 μmol, 43%) as a pale-yellow coloured solid.

**Conditions C:** Following **GP 4**, a solution of nitroethene **1g** (18.3 mg, 100 μmol, 1.00 equiv) and 2,3-dimethyl-2-butene (119 μL, 84.1 mg, 1.00 mmol, 10.0 equiv) in dichloromethane (5 mL) was irradiated at λ = 424 nm (LED) for four hours at -78 °C. The crude product was purified by column chromatography (2 × 10 cm, P/Et<sub>2</sub>O = 19/1) to yield **2g** (14.4 mg, 53.8 μmol, 54%) as a pale-yellow coloured solid.

**TLC:**  $R_f = 0.54$  (P/Et<sub>2</sub>O = 9/1) [UV, KMnO<sub>4</sub>].

**IR** (ATR):  $\tilde{\nu}$  [cm<sup>-1</sup>] = 3073 (w, C<sub>ar</sub>-H), 2972 (m, C<sub>ar</sub>-H), 2958 (w), 1539 (vs, C-NO<sub>2</sub>), 1494 (m, C<sub>sp3</sub>-H), 1370 (s, C-NO<sub>2</sub>), 1153 (m), 1135 (m), 1089 (m, C<sub>ar</sub>-Cl), 877 (m, C<sub>ar</sub>-H), 839 (s, C<sub>ar</sub>-H), 767 (s, C<sub>ar</sub>-H).

**MS** (EI):  $m/z$  (%) = 221 (29) [M-NO<sub>2</sub>]<sup>+</sup>, 179 (100) [M-NO<sub>2</sub>-C<sub>3</sub>H<sub>6</sub>]<sup>+</sup>, 125 (64) [C<sub>7</sub>H<sub>6</sub>Cl]<sup>+</sup>.

**HRMS** (EI, 70 eV): calcd for C<sub>14</sub>H<sub>18</sub>ClNO<sub>2</sub><sup>+</sup> [M]<sup>+</sup>: 267.1021; found: 267.1021.

**<sup>1</sup>H NMR** (400 MHz, CDCl<sub>3</sub>):  $\delta$  [ppm] = 7.33–7.29 (m, 2H, H-2, H-6), 7.06–7.02 (m, 2H, H-3, H-5), 4.85 (d, <sup>3</sup>J = 10.0 Hz, 1H, H-4'), 3.92 (d, <sup>3</sup>J = 10.0 Hz, 1H, H-1'), 1.24 (s, 3H, CH<sub>3</sub>-2'), 1.17 (s, 3H, CH<sub>3</sub>-3'), 1.15 (s, 3H, CH<sub>3</sub>-2'), 0.70 (s, 3H, CH<sub>3</sub>-3').

**<sup>13</sup>C NMR** (101 MHz, CDCl<sub>3</sub>):  $\delta$  [ppm] = 134.9 (s, C-4), 133.0 (s, C-1), 128.9 (d, 2C, C-2, C-6), 128.4 (d, 2C, C-3, C-5), 84.9 (d, C-4'), 49.0 (d, C-1'), 45.1 (s, C-3'), 39.4 (s, C-2'), 24.3 [q, (C-3')CH<sub>3</sub>], 22.8 [q, (C-2')CH<sub>3</sub>], 21.5 [q, (C-3')CH<sub>3</sub>], 19.5 [q, (C-2')CH<sub>3</sub>].

### 1-Bromo-4-(2',2',3',3'-tetramethyl-4'-nitrocyclobutyl)benzene (**2h**)

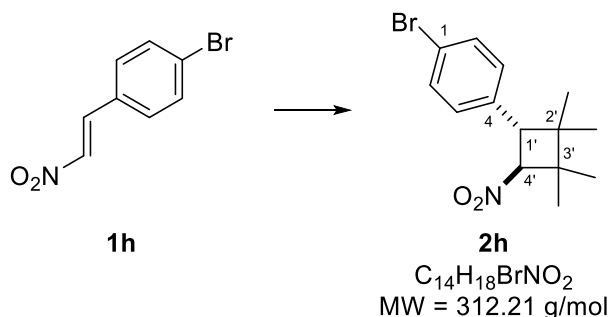

**Conditions A:** Following **GP 4**, a solution of nitroethene **1h** (22.8 mg, 100  $\mu$ mol, 1.00 equiv) and 2,3-dimethyl-2-butene (119  $\mu$ L, 84.2 mg, 1.00 mmol, 10.0 equiv) in dichloromethane (5 mL) was irradiated at  $\lambda = 419$  nm (fluorescent lamps) for six hours at room temperature. The crude product was purified by column chromatography (2  $\times$  10 cm, P/Et<sub>2</sub>O = 19/1) to yield **2h** (17.6 mg, 56.4  $\mu$ mol, 56%) as a yellow coloured oil.

**Conditions B:** Following **GP 4**, a solution of nitroethene **1h** (22.8 mg, 100  $\mu$ mol, 1.00 equiv) and 2,3-dimethyl-2-butene (119  $\mu$ L, 84.2 mg, 1.00 mmol, 10.0 equiv) in dichloromethane (5 mL) was irradiated at  $\lambda = 424$  nm (LED) for six hours at room temperature. The crude product was purified by column chromatography (2  $\times$  10 cm, P/Et<sub>2</sub>O = 19/1) to yield **2h** (18.0 mg, 56.0  $\mu$ mol, 58%) as a yellow coloured oil.

**Conditions C:** Following **GP 4**, a solution of nitroethene **1h** (22.8 mg, 100  $\mu\text{mol}$ , 1.00 equiv) and 2,3-dimethyl-2-butene (119  $\mu\text{L}$ , 84.2 mg, 1.00 mmol, 10.0 equiv) in dichloromethane (5 mL) was irradiated at  $\lambda = 424$  nm (LED) for six hours at  $-78$   $^{\circ}\text{C}$ . The crude product was purified by column chromatography ( $2 \times 10$  cm, P/Et<sub>2</sub>O = 19/1) to yield **2h** (17.0 mg, 54.5  $\mu\text{mol}$ , 55%) as a yellow coloured oil.

**TLC:**  $R_f = 0.43$  (P/Et<sub>2</sub>O = 9/1) [UV, KMnO<sub>4</sub>].

**IR** (ATR):  $\tilde{\nu}$  [ $\text{cm}^{-1}$ ] = 2962 (w, C<sub>ar</sub>-H), 2925 (w, C-H), 1552 (w, C-NO<sub>2</sub>), 1464 (w, C<sub>sp3</sub>-H), 1376 (w, C-NO<sub>2</sub>), 1259 (m), 1072 (m, C<sub>ar</sub>-Br), 1010 (s), 861 (s, C<sub>ar</sub>-H), 797 (s, C<sub>ar</sub>-H).

**MS** (EI):  $m/z$  (%) = 265 (20) [M-NO<sub>2</sub>]<sup>+</sup>, 168 (100) [M-NO<sub>2</sub>-Br]<sup>+</sup>, 143 (56) [M-NO<sub>2</sub>-Br-C<sub>3</sub>H<sub>6</sub>]<sup>+</sup>.

**HRMS** (ESI): calcd for C<sub>14</sub>H<sub>19</sub><sup>79</sup>BrNO<sub>2</sub><sup>+</sup> [M+H]<sup>+</sup>: 312.0594; found: 312.0593.

calcd for C<sub>14</sub>H<sub>19</sub><sup>81</sup>BrNO<sub>2</sub><sup>+</sup> [M+H]<sup>+</sup>: 314.0573; found: 314.0573.

**<sup>1</sup>H NMR** (500 MHz, CDCl<sub>3</sub>):  $\delta$  [ppm] = 7.48–7.44 (m, 2H, H-2, H-6), 7.00–6.96 (m, 2H, H-3, H-5), 4.85 (d, <sup>3</sup>J = 10.1 Hz, 1H, H-4'), 3.90 (d, <sup>3</sup>J = 10.1 Hz, 1H, H-1'), 1.23 (s, 3H, CH<sub>3</sub>-3'), 1.17 (s, 3H, CH<sub>3</sub>-2'), 1.14 (s, 3H, CH<sub>3</sub>-3'), 0.70 (s, 3H, CH<sub>3</sub>-2').

**<sup>13</sup>C NMR** (101 MHz, CDCl<sub>3</sub>):  $\delta$  [ppm] = 135.5 (s, C-1), 131.8 (d, 2C, C-2, C-6), 128.7 (d, 2C, C-3, C-5), 121.1 (s, C-4), 84.8 (d, C-4'), 49.1 (d, C-1'), 45.1 (s, C-3'), 39.4 (s, C-2'), 24.3 [q, (C-3')CH<sub>3</sub>], 22.8 [q, (C-2')CH<sub>3</sub>], 21.5 [q, (C-3')CH<sub>3</sub>], 19.5 [q, (C-2')CH<sub>3</sub>].

#### Methyl 4-(2',2',3',3'-tetramethyl-4'-nitrocyclobutyl)benzoate (**2i**)

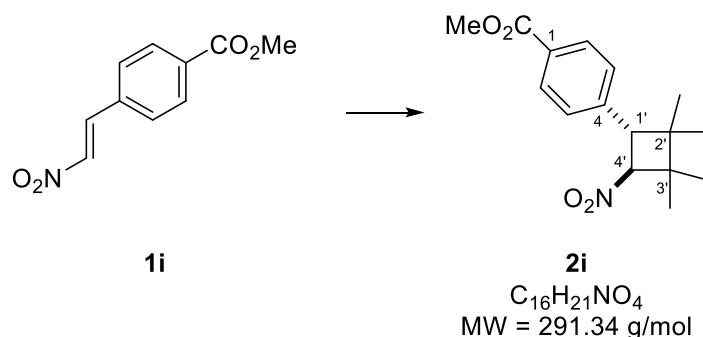

**Conditions A:** Following **GP 4**, a solution of nitroethene **1i** (41.4 mg, 200  $\mu\text{mol}$ , 1.00 equiv) and 2,3-dimethyl-2-butene (237  $\mu\text{L}$ , 168 mg, 2.00 mmol, 10.0 equiv) in dichloromethane (10 mL) was irradiated at  $\lambda = 419$  nm (fluorescent lamps) for five hours at room temperature.

The crude product was purified by column chromatography (2 × 15 cm, P/Et<sub>2</sub>O = 9/1) to yield **2i** (16.8 mg, 57.7 μmol, 32%) and the side product (1.18 mg, 4.05 μmol, 2%) as a mixture (colorless solid).

**Conditions B:** Following **GP 4**, a solution of nitroethene **1i** (20.7 mg, 100 μmol, 1.00 equiv) and 2,3-dimethyl-2-butene (119 μL, 84.1 mg, 1.00 mmol, 10.0 equiv) in dichloromethane (5 mL) was irradiated at λ = 424 nm (LED) for five hours at room temperature. The crude product was purified by column chromatography (2 × 15 cm, P/Et<sub>2</sub>O = 9/1) to yield **2i** (6.45 mg, 22.1 μmol, 22%) and the side product (0.65 mg, 2.23 μmol, 2%) as a mixture (colorless solid).

**Conditions C:** Following **GP 4**, a solution of nitroethene **1i** (20.7 mg, 100 μmol, 1.00 equiv) and 2,3-dimethyl-2-butene (119 μL, 84.1 mg, 1.00 mmol, 10.0 equiv) in dichloromethane (5 mL) was irradiated at λ = 424 nm (LED) for four hours at -78 °C. The crude product was purified by column chromatography (2 × 15 cm, P/Et<sub>2</sub>O = 9/1) to yield **2i** (9.47 mg, 32.5 μmol, 33%) and the side product (1.23 mg, 4.22 μmol, 4%) as a mixture (colorless solid).

**TLC:** *R<sub>f</sub>* = 0.64 (P/Et<sub>2</sub>O = 1/1) [UV, KMnO<sub>4</sub>].

**mp:** 112 °C.

**IR** (ATR):  $\tilde{\nu}$  [cm<sup>-1</sup>] = 2954 (m, C<sub>ar</sub>-H), 1717 (vs, C=O), 1541 (s, C-NO<sub>2</sub>), 1433 (m, C<sub>sp3</sub>-H), 1371 (s, C-NO<sub>2</sub>), 1277 (s, O=C-OCH<sub>3</sub>), 1181 (m), 1151 (m), 1138 (m), 1110 (s, O=C-OCH<sub>3</sub>), 1017 (s), 860 (m, C<sub>ar</sub>-H), 756 (s, C<sub>ar</sub>-H).

**MS** (EI): *m/z* (%) = 245 (92) [M-NO<sub>2</sub>]<sup>+</sup>, 203 (39) [M-NO<sub>2</sub>-C<sub>3</sub>H<sub>6</sub>]<sup>+</sup>, 171 (51), 159 (34), 84 (100) [C<sub>6</sub>H<sub>12</sub>]<sup>+</sup>, 69 (35).

**HRMS** (ESI): calcd for C<sub>16</sub>H<sub>22</sub>NO<sub>4</sub><sup>+</sup> [M+H]<sup>+</sup> 292.1543; found: 292.1544.

**<sup>1</sup>H NMR** (400 MHz, CDCl<sub>3</sub>): δ [ppm] = 8.00 (d, <sup>3</sup>*J* = 7.3 Hz, 2H, H-2, H-6), 7.18 (d, <sup>3</sup>*J* = 7.3 Hz, 2H, H-3, H-5), 4.92 (d, <sup>3</sup>*J* = 9.9 Hz, 1H, H-4'), 4.01 (d, <sup>3</sup>*J* = 9.9 Hz, 1H, H-1'), 1.24 (s, 3H, CH<sub>3</sub>-3'), 1.20 (s, 3H, CH<sub>3</sub>-2'), 1.16 (s, 3H, CH<sub>3</sub>-3'), 0.69 (s, 3H, CH<sub>3</sub>-2').

**<sup>13</sup>C NMR** (101 MHz, CDCl<sub>3</sub>): δ [ppm] = 167.0 (s, CH<sub>3</sub>CO<sub>2</sub>Ar), 141.8 (s, C-1), 130.0 (d, 2C, C-2, C-6), 129.1 (s, C-4), 127.0 (d, 2C, C-3, C-5), 84.6 (d, C-4'), 53.2 (q, CH<sub>3</sub>CO<sub>2</sub>Ar) 49.5 (d, C-1'), 45.1 (s, C-2'), 39.7 (s, C-3'), 24.3 [q, (C-3')CH<sub>3</sub>], 22.7 [q, (C-2')CH<sub>3</sub>], 21.5 [q, (C-2')CH<sub>3</sub>], 19.5 [q, (C-3')CH<sub>3</sub>].

## Methyl 4-(4'-methyl-2'-nitropent-4'-en-1'-yl)benzoate

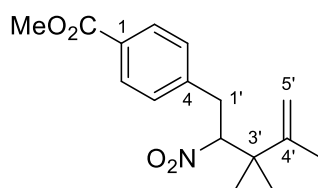

$C_{16}H_{21}NO_4$   
MW = 291.34 g/mol

**TLC:**  $R_f = 0.70$  (P/Et<sub>2</sub>O = 1/1) [UV, KMnO<sub>4</sub>].

**MS** (EI):  $m/z$  (%) = 245 (21) [M-NO<sub>2</sub>]<sup>+</sup>, 229 (41) [C<sub>15</sub>H<sub>17</sub>O<sub>2</sub>]<sup>+</sup>, 149 (100) [C<sub>9</sub>H<sub>9</sub>O<sub>2</sub>]<sup>+</sup>, 121 (33) [C<sub>7</sub>H<sub>5</sub>O<sub>2</sub>]<sup>+</sup>, 83 (54), 55 (24).

**HRMS** (ESI): calcd for C<sub>16</sub>H<sub>22</sub>NO<sub>4</sub><sup>+</sup> [M+H]<sup>+</sup> 292.1543; found: 292.1543.

**IR** (ATR):  $\tilde{\nu}$  [cm<sup>-1</sup>] = 3096 (w, C<sub>ar</sub>-H), 2922 (m, C=CH<sub>2</sub>), 2854 (m, C-H), 1721 (s, C=O), 1549 (s, C-NO<sub>2</sub>), 1436 (m, C<sub>sp3</sub>-H), 1367 (m, C-NO<sub>2</sub>), 1278 (s, O=C-OCH<sub>3</sub>), 1182 (m), 1109 (m, O=C-OCH<sub>3</sub>), 759 (m, C<sub>ar</sub>-H).

**<sup>1</sup>H NMR** (500 MHz, CDCl<sub>3</sub>):  $\delta$  [ppm] = 7.95 (d, <sup>3</sup>J = 7.1 Hz, 2H, H-2, H-6), 7.18 (d, <sup>3</sup>J = 7.1 Hz, 2H, H-3, H-5), 5.01 (d, <sup>4</sup>J = 1.1 Hz, 2H, C=CH<sub>2</sub>), 4.80 (*virt.* d, <sup>3</sup>J  $\cong$  <sup>3</sup>J = 11.9 Hz, 1H, H-2'), 3.33 (*virt.* t, <sup>2</sup>J  $\cong$  <sup>3</sup>J = 13.2 Hz, 1H, CHH-1'), 2.96 (d, <sup>2</sup>J = 14.8 Hz, 1H, CHH-1'), 1.87 [s, 3H, (C-4')CH<sub>3</sub>], 1.29 [s, 3H, (C-3')CH<sub>3</sub>], 1.23 [s, 3H, (C-3')CH<sub>3</sub>].

**<sup>13</sup>C NMR** (101 MHz, CDCl<sub>3</sub>):  $\delta$  [ppm] = 166.9 (s, CH<sub>3</sub>CO<sub>2</sub>Ar), 147.6 (s, C-4'), 142.1 (s, C-4), 130.3 (d, 2C, C-3, C-5), 129.4 (s, C<sub>ar</sub>CO<sub>2</sub>CH<sub>3</sub>), 128.8 (d, 2C, C-2, C-6), 114.2 (t, C=CH<sub>2</sub>), 96.1 (d, C-2'), 52.3 (q, CH<sub>3</sub>CO<sub>2</sub>Ar), 43.1 (s, C-3'), 34.9 (t, C-1'), 24.7 [q, (C-3')CH<sub>3</sub>], 21.7 [q, (C-3')CH<sub>3</sub>], 19.7 [q, (C-4')CH<sub>3</sub>].



### 1-Chloro-3-(2',2',3',3'-tetramethyl-4'-nitrocyclobutyl)benzene (2j)

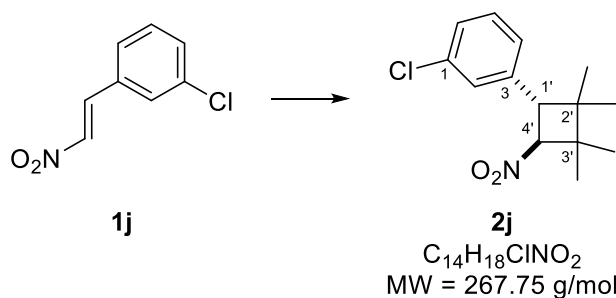

**Conditions A:** Following **GP 4**, a solution of nitroethene **1j** (36.7 mg, 200  $\mu$ mol, 1.00 equiv) and 2,3-dimethyl-2-butene (237  $\mu$ L, 168 mg, 2.00 mmol, 10.0 equiv) in dichloromethane (10 mL) was irradiated at  $\lambda = 419$  nm (fluorescent lamps) for six hours at room temperature (at that point, no further conversion was observed). The crude product was purified by column chromatography (2  $\times$  12 cm, P/Et<sub>2</sub>O = 19/1) to yield **2j** (20.4 mg, 76.2  $\mu$ mol, 38%) as a colorless oil. Starting material was recovered as *trans*-isomer *trans*-**1j** (9.60 mg, 52.3  $\mu$ mol, 26%).

**Conditions B:** Following **GP 4**, a solution of nitroethene **1j** (18.4 mg, 100  $\mu$ mol, 1.00 equiv) and 2,3-dimethyl-2-butene (119  $\mu$ L, 84.2 mg, 1.00 mmol, 10.0 equiv) in dichloromethane (5 mL) was irradiated at  $\lambda = 424$  nm (LED) for six hours at room temperature (at that point, no further conversion was observed). The crude product was purified by column chromatography (2  $\times$  10 cm, P/Et<sub>2</sub>O = 19/1) to yield **2j** (10.3 mg, 38.5  $\mu$ mol, 38%) as a colorless oil. Starting material was recovered as *trans*-isomer *trans*-**1j** (5.00 mg, 27.2  $\mu$ mol, 27%).

**Conditions C:** Following **GP 4**, a solution of nitroethene **1j** (18.4 mg, 100  $\mu$ mol, 1.00 equiv) and 2,3-dimethyl-2-butene (119  $\mu$ L, 84.2 mg, 1.00 mmol, 10.0 equiv) in dichloromethane (5 mL) was irradiated at  $\lambda = 424$  nm (LED) for six hours at  $-78$  °C (at that point, no further conversion was observed). The crude product was purified by column chromatography (2  $\times$  10 cm, P/Et<sub>2</sub>O = 19/1) to yield **2j** (6.90 mg, 25.8  $\mu$ mol, 26%) as a colorless oil. Starting material was recovered as *trans*-isomer *trans*-**1j** (3.90 mg, 21.2  $\mu$ mol, 21%).

**TLC:**  $R_f = 0.53$  (P/Et<sub>2</sub>O = 9/1) [UV, KMnO<sub>4</sub>].

**IR** (ATR):  $\tilde{\nu}$  [cm<sup>-1</sup>] = 3066 (w, C<sub>ar</sub>-H), 2967 (m, C<sub>ar</sub>-H), 1598 (m), 1538 (vs, C-NO<sub>2</sub>), 1371 (s, C-NO<sub>2</sub>), 1151 (m), 1138 (m), 1081 (m, C<sub>ar</sub>-Cl), 877 (m, C<sub>ar</sub>-H), 8147 (m, C<sub>ar</sub>-H), 772 (s, C<sub>ar</sub>-H).

**MS** (EI):  $m/z$  (%) = 221 (32) [M-NO<sub>2</sub>]<sup>+</sup>, 179 (100) [M-NO<sub>2</sub>-C<sub>3</sub>H<sub>6</sub>]<sup>+</sup>, 125 (32) [C<sub>7</sub>H<sub>6</sub>Cl]<sup>+</sup>.

**HRMS** (ESI): calcd for  $C_{14}H_{19}ClNO_2^+$   $[M+H]^+$ : 268.1099; found: 268.1098.

**$^1H$  NMR** (400 MHz,  $CDCl_3$ ):  $\delta$  [ppm] = 7.29–7.22 (m, 2H,  $H_{ar}$ )\*, 7.09–7.08 (m, 1H,  $H_{ar}$ )\*, 6.99 (dtd,  $^3J = 7.1$  Hz,  $^4J = 1.8$  Hz, 0.8 Hz, 1H,  $H_{ar}$ )\*, 4.86 (d,  $^3J = 10.0$  Hz, 1H, H-4'), 3.93 (d,  $^3J = 10.0$  Hz, 1H, H-1'), 1.24 (s, 3H,  $CH_3$ -3'), 1.18 (s, 3H,  $CH_3$ -2'), 1.14 (s, 3H,  $CH_3$ -3'), 0.72 (s, 3H,  $CH_3$ -2').

**$^{13}C$  NMR** (101 MHz,  $CDCl_3$ ):  $\delta$  [ppm] = 138.6 (s, C-3), 134.7 (s, C-1), 129.9 (d,  $C_{ar}H$ )\*, 127.3 (d,  $C_{ar}H$ )\*, 127.2 (d,  $C_{ar}H$ )\*, 125.2 (d,  $C_{ar}H$ )\*, 84.7 (d, C-4'), 49.2 (d, C-1'), 45.0 (s, C-3'), 39.5 (s, C-2'), 24.3 [q, (C-2') $CH_3$ ], 22.7 [q, (C-3') $CH_3$ ], 21.5 [q, (C-2') $CH_3$ ], 19.4 [q, (C-3') $CH_3$ ].

\* The exact assignment of these signals was not possible.

### 3-(2',2',3',3'-Tetramethyl-4'-nitrocyclobutyl)benzonitrile (**2k**)

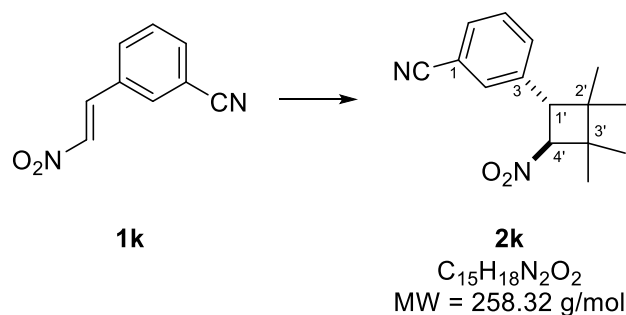

**Conditions A:** Following **GP 4**, a solution of nitroethene **1k** (34.8 mg, 200  $\mu$ mol, 1.00 equiv) and 2,3-dimethyl-2-butene (237  $\mu$ L, 168 mg, 2.00 mmol, 10.0 equiv) in dichloromethane (10 mL) were irradiated at  $\lambda = 419$  nm (fluorescent lamps) for six hours at room temperature. The crude product was purified by column chromatography (2  $\times$  12 cm, P/Et<sub>2</sub>O = 19/1) to yield **2k** (18.2 mg, 70.5  $\mu$ mol, 35%) and the side product **6** (2.32 mg, 8.99  $\mu$ mol, 11%) as a mixture (colorless liquid).

**Conditions B:** Following **GP 4**, a solution of nitroethene **1k** (17.9 mg, 100  $\mu$ mol, 1.00 equiv) and 2,3-dimethyl-2-butene (119  $\mu$ L, 84.2 mg, 1.00 mmol, 10.0 equiv) dichloromethane (5 mL) was irradiated at  $\lambda = 424$  nm (LED) for six hours at room temperature. The crude product was purified by column chromatography (2  $\times$  10 cm, P/Et<sub>2</sub>O = 19/1) to yield **2k** (8.84 mg, 34.2  $\mu$ mol, 33%) and the side product **6** (>1.00 mg, 3.81  $\mu$ mol, 13%) as a mixture (colorless liquid).

**Conditions C:** Following **GP 4**, a solution of nitroethene **1k** (17.9 mg, 100  $\mu$ mol, 1.00 equiv) and 2,3-dimethyl-2-butene (119  $\mu$ L, 84.2 mg, 1.00 mmol, 10.0 equiv) in dichloromethane

(5 mL) was irradiated at  $\lambda = 424$  nm (LED) for six hours at  $-78$  °C. The crude product was purified by column chromatography ( $2 \times 10$  cm, P/Et<sub>2</sub>O = 19/1) to yield **2k** (5.12 mg, 19.8  $\mu$ mol, 20%) and the side product **6** (1.00 mg, 3.87  $\mu$ mol, 16%) as a mixture (colorless liquid).

**TLC:**  $R_f = 0.53$  (P/Et<sub>2</sub>O = 9/1) [UV, KMnO<sub>4</sub>].

**IR** (ATR):  $\tilde{\nu}$  [cm<sup>-1</sup>] = 3079 (w, C<sub>ar</sub>-H), 2960 (m, C<sub>ar</sub>-H), 2231 (m, -C≡N), 1533 (vs, C-NO<sub>2</sub>), 1372 (s, C-NO<sub>2</sub>), 1151 (w), 1136 (w), 793 (m, C<sub>ar</sub>-H).

**MS** (EI):  $m/z$  (%) = 212 (32) [M-NO<sub>2</sub>]<sup>+</sup>, 170 (100) [M-NO<sub>2</sub>-C<sub>3</sub>H<sub>6</sub>]<sup>+</sup>, 116 (20) [C<sub>8</sub>H<sub>6</sub>N]<sup>+</sup>.

**HRMS** (ESI): calcd for C<sub>15</sub>H<sub>19</sub>N<sub>2</sub>O<sub>2</sub><sup>+</sup> [M+H]<sup>+</sup>: 259.1440; found: 259.1442.

**<sup>1</sup>H NMR** (400 MHz, CDCl<sub>3</sub>):  $\delta$  [ppm] = 7.59–7.55 (m, 1H, H<sub>ar</sub>)\*, 7.46 (td, <sup>3</sup>J = 7.7 Hz, <sup>4</sup>J = 0.6 Hz, 1H, H<sub>ar</sub>)\*, 7.41–7.39 (m, 1H, H<sub>ar</sub>)\*, 7.36–7.33 (m, 1H, H<sub>ar</sub>)\*, 4.87 (d, <sup>3</sup>J = 10.0 Hz, 1H, H-4'), 3.97 (d, <sup>3</sup>J = 10.0 Hz, 1H, H-1'), 1.25 (s, 3H, CH<sub>3</sub>-3'), 1.20 (s, 3H, CH<sub>3</sub>-2'), 1.16 (s, 3H, CH<sub>3</sub>-3'), 0.71 (s, 3H, CH<sub>3</sub>-2').

**<sup>13</sup>C NMR** (101 MHz, CDCl<sub>3</sub>):  $\delta$  [ppm] = 138.2 (s, C-3), 131.5 (d, C<sub>ar</sub>H)\*, 130.9 (d, C<sub>ar</sub>H)\*, 130.6 (d, C<sub>ar</sub>H)\*, 129.6 (d, C<sub>ar</sub>H)\*, 118.7 (s, C<sub>ar</sub>CN), 113.0 (s, C-1), 84.4 (d, C-4'), 49.1 (d, C-1), 45.2 (s, C-3'), 39.6 (s, C-2'), 24.3 [q, (C-2')CH<sub>3</sub>], 22.7 [q, (C-3')CH<sub>3</sub>], 21.5 [q, (C-2')CH<sub>3</sub>], 19.4 [q, (C-3')CH<sub>3</sub>].

\* The exact assignment of these signals was not possible.

### 3-(3',3',4'-Trimethyl-2'-nitropent-4'-en-1'-yl)-benzonitrile (**6**)

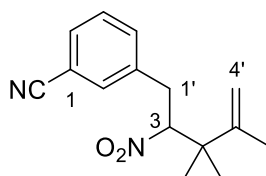

**6**  
C<sub>15</sub>H<sub>18</sub>N<sub>2</sub>O<sub>2</sub>  
MW = 258.32 g/mol

**TLC:**  $R_f = 0.23$  (P/Et<sub>2</sub>O = 9/1) [KMnO<sub>4</sub>].

**IR** (ATR):  $\tilde{\nu}$  [ $\text{cm}^{-1}$ ] = 2923 (m,  $\text{C}_{\text{ar}}\text{-H}$ ), 2231 (w), 1549 (vs,  $\text{C-NO}_2$ ), 1365 (m,  $\text{C-NO}_2$ ), 1148 (m), 905 (m), 798 (m,  $\text{C}_{\text{ar}}\text{-H}$ ), 691 (m,  $\text{C}_{\text{ar}}\text{-H}$ ).

**MS** (EI):  $m/z$  (%) = 196 (15) [ $\text{M-NO}_2$ ] $^+$ , 170 (58) [ $\text{C}_{12}\text{H}_{12}\text{N}$ ] $^+$ , 116 (100) [ $\text{C}_8\text{H}_6\text{N}$ ] $^+$ .

**HRMS** (ESI): calcd for  $\text{C}_{15}\text{H}_{19}\text{N}_2\text{O}_2^+$  [ $\text{M+H}$ ] $^+$ : 259.1441; found: 259.1439.

**$^1\text{H}$  NMR** (500 MHz,  $\text{CDCl}_3$ ):  $\delta$  [ppm] = 7.54 (dd,  $^3J = 7.6$  Hz,  $^4J = 1.6$  Hz, 1H, H-4)\*, 7.41–7.38 (m, 2H, H-2, H-5), 7.35 (d,  $^3J = 8.0$  Hz, 1H, H-6)\*, 5.04 (s, 1H,  $\text{CHH-5}'$ ), 5.00 (s, 1H,  $\text{CHH-5}'$ ), 4.76 (dd,  $^3J = 12.0$  Hz, 2.2 Hz, 1H, H-2'), 3.32 (dd,  $^2J = 15.0$ ,  $^3J = 11.9$  Hz, 1H,  $\text{CHH-1}'$ ), 2.94 (dd,  $^2J = 15.0$ ,  $^3J = 2.2$  Hz, 1H,  $\text{CHH-1}'$ ), 1.87 (d,  $^4J = 1.4$  Hz, 3H,  $\text{CH}_3\text{-4}'$ ), 1.29 (s, 3H,  $\text{CH}_3\text{-3}'$ ), 1.23 (s, 3H,  $\text{CH}_3\text{-3}'$ ).

**$^{13}\text{C}$  NMR** (126 MHz,  $\text{CDCl}_3$ ):  $\delta$  [ppm] = 147.3 (s, C-4'), 138.3 (s, C-3), 133.3 (d, C-6)\*, 132.4 (d, C-2), 131.2 (d, C-4)\*, 129.9 (d, C-5), 118.6 (s, CN), 114.5 (t, C-5'), 113.2 (s, C-1), 96.0 (d, C-2'), 43.0 (s, C-3'), 34.4 (t, C-1'), 24.7 [q, (C-3') $\text{CH}_3$ ], 21.6 [q, (C-3') $\text{CH}_3$ ], 19.6 [q, (C-4') $\text{CH}_3$ ].

### 1-Chloro-2-(2',2',3',3'-tetramethyl-4'-nitrocyclobutyl)benzene (**21**)

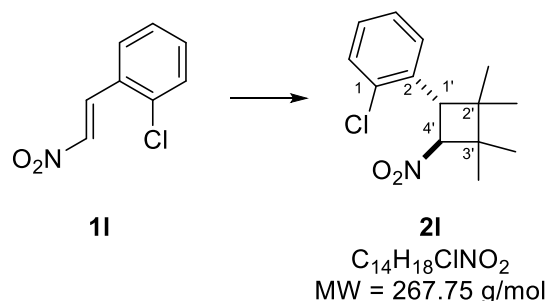

**Conditions A:** Following **GP 4**, a solution of nitroethene **11** (36.7 mg, 200  $\mu\text{mol}$ , 1.00 equiv) and 2,3-dimethyl-2-butene (237  $\mu\text{L}$ , 168 mg, 2.00 mmol, 10.0 equiv) in dichloromethane (10 mL) was irradiated at  $\lambda = 419$  nm (fluorescent lamps) for six hours at room temperature (at that point, no further conversion was observed). The crude product was purified by column chromatography (2  $\times$  12 cm, P/Et<sub>2</sub>O = 19/1) to yield **21** (15.2 mg, 56.8  $\mu\text{mol}$ , 28%, 46% *brsm*) as a colorless oil. Starting material **11** was recovered as mixture of isomers (13.5 mg, 73.5  $\mu\text{mol}$ , 39%, *cis/trans* = 70/30).

**Conditions B:** Following **GP 4**, a solution of nitroethene **11** (18.4 mg, 100  $\mu\text{mol}$ , 1.00 equiv) and 2,3-dimethyl-2-butene (119  $\mu\text{L}$ , 84.2 mg, 1.00 mmol, 10.0 equiv) in dichloromethane (5 mL) was irradiated at  $\lambda = 424$  nm (LED) for six hours at room temperature (at that point, no

further conversion was observed). The crude product was purified by column chromatography ( $2 \times 10$  cm, P/Et<sub>2</sub>O = 19/1) to yield **2I** (4.96 mg, 18.5  $\mu$ mol, 19%, 30% *brsm*) as a colorless oil. Starting material **1I** was recovered as mixture of isomers (6.74 mg, 36.7  $\mu$ mol, 37%, *cis/trans* = 92/8).

**Conditions C:** Following **GP 4**, a solution of nitroethene **2I** (18.4 mg, 100  $\mu$ mol, 1.00 equiv) and 2,3-dimethyl-2-butene (119  $\mu$ L, 84.2 mg, 1.00 mmol, 10.0 equiv) in dichloromethane (5 mL) was irradiated at  $\lambda = 424$  nm (LED) for six hours at  $-78$  °C (at that point, no further conversion was observed). The crude product was purified by column chromatography ( $2 \times 10$  cm, P/Et<sub>2</sub>O = 19/1) to yield **2I** (7.46 mg, 27.9  $\mu$ mol, 28%, 49% *brsm*) as a colorless oil. Starting material was recovered as *cis*-isomer *cis*-**1I** (7.94 mg, 43.2  $\mu$ mol, 43%).

**TLC:**  $R_f = 0.53$  (P/Et<sub>2</sub>O = 9/1) [UV, KMnO<sub>4</sub>].

**IR** (ATR):  $\tilde{\nu}$  [cm<sup>-1</sup>] = 3061 (w, C<sub>ar</sub>-H), 2973 (m, C<sub>ar</sub>-H), 2960 (w), 1541 (vs, C-NO<sub>2</sub>), 1372 (s, C-NO<sub>2</sub>), 1153 (m), 1135 (m), 1033 (m, C<sub>ar</sub>-Cl), 876 (m, C<sub>ar</sub>-H), 807 (m, C<sub>ar</sub>-H), 754 (vs, C<sub>ar</sub>-H).

**MS** (EI):  $m/z$  (%) = 221 (32) [M-NO<sub>2</sub>]<sup>+</sup>, 179 (100) [M-NO<sub>2</sub>-C<sub>3</sub>H<sub>6</sub>]<sup>+</sup>, 125 (28) [C<sub>7</sub>H<sub>6</sub>Cl]<sup>+</sup>.

**HRMS** (ESI): calcd for C<sub>14</sub>H<sub>19</sub>ClNO<sub>2</sub><sup>+</sup> [M+H]<sup>+</sup>: 268.1099; found: 268.1094.

**<sup>1</sup>H NMR** (400 MHz, CDCl<sub>3</sub>):  $\delta$  [ppm] = 7.41 (dd, <sup>3</sup>*J* = 7.6 Hz, <sup>4</sup>*J* = 1.6 Hz, 1H, H-6), 7.28–7.18 (m, 2H, H-5, H-4), 7.16 (dd, <sup>3</sup>*J* = 7.5 Hz, <sup>4</sup>*J* = 1.9 Hz, 1H, H-3), 4.99 (d, <sup>3</sup>*J* = 10.2 Hz, 1H, H-4'), 4.43 (d, <sup>3</sup>*J* = 10.2 Hz, 1H, H-1'), 1.26 (s, 3H, CH<sub>3</sub>-2'), 1.24 (s, 3H, CH<sub>3</sub>-3'), 1.19 (s, 3H, CH<sub>3</sub>-3'), 0.73 (s, 3H, CH<sub>3</sub>-2').

**<sup>13</sup>C NMR** (101 MHz, CDCl<sub>3</sub>):  $\delta$  [ppm] = 134.7 (s, C-2), 134.1 (s, C-1), 130.3 (d, C-6), 128.4 (d, C-5)\*, 128.1 (d, C-3), 126.8 (d, C-4)\*, 84.4 (d, C-4'), 46.8 (d, C-1'), 44.5 (s, C-2'), 40.5 (s, C-3'), 24.9 [q, (C-3')CH<sub>3</sub>], 22.7 [q, (C-2')CH<sub>3</sub>], 21.8 [q, (C-2')CH<sub>3</sub>], 19.4 [q, (C-3')CH<sub>3</sub>].

\* The assignment is interconvertible.

## 2-(2',2',3',3'-Tetramethyl-4'-nitrocyclobutyl)pyridine (**2m**)

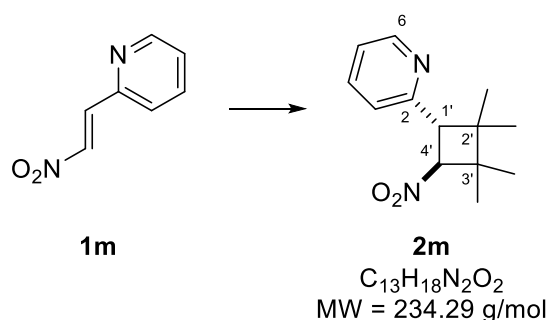

**Conditions A:** Following **GP 4**, a solution of nitroethene **1m** (15.0 mg, 100  $\mu$ mol, 1.00 equiv) and 2,3-dimethyl-2-butene (119  $\mu$ L, 84.2 mg, 1.00 mmol, 10.0 equiv) in dichloromethane (5 mL) was irradiated at  $\lambda = 419$  nm (fluorescent lamps) for 24 hours at room temperature. The crude product was purified by column chromatography (2  $\times$  15 cm,  $CH_2Cl_2/MeOH = 40/1$ ) to yield **2m** (13.7 mg, 58.5  $\mu$ mol, 58%) as a yellow coloured oil.

**Conditions B:** Following **GP 4**, a solution of nitroethene **1m** (15.0 mg, 100  $\mu$ mol, 1.00 equiv) and 2,3-dimethyl-2-butene (119  $\mu$ L, 84.2 mg, 1.00 mmol, 10.0 equiv) in dichloromethane (5 mL) was irradiated at  $\lambda = 424$  nm (LED) for 24 hours at room temperature. The crude product was purified by column chromatography (2  $\times$  15 cm,  $CH_2Cl_2/MeOH = 40/1$ ) to yield **2m** (13.4 mg, 57.2  $\mu$ mol, 57%) as a yellow coloured oil.

**Conditions C:** Following **GP 4**, a solution of nitroethene **1m** (15.0 mg, 100  $\mu$ mol, 1.00 equiv) and 2,3-dimethyl-2-butene (119  $\mu$ L, 84.2 mg, 1.00 mmol, 10.0 equiv) in dichloromethane (5 mL) was irradiated at  $\lambda = 424$  nm (LED) for 24 hours at  $-78$   $^{\circ}C$ . The crude product was purified by column chromatography (2  $\times$  15 cm,  $CH_2Cl_2/MeOH = 40/1$ ) to yield **2m** (15.5 mg, 66.2  $\mu$ mol, 66%) as a yellow coloured oil.

**TLC:**  $R_f = 0.25$  ( $CH_2Cl_2/MeOH = 19/1$ ) [UV,  $KMnO_4$ ].

**IR** (ATR):  $\tilde{\nu}$  [ $cm^{-1}$ ] = 3445 (br), 3008 (w,  $C_{ar}-H$ ), 2930 (w, C-H), 1597 (w, C- $NO_2$ ), 1448 (m,  $C_{sp^3}-H$ ), 1386 (m, C- $NO_2$ ), 1225 (m), 1052 (s), 1025 (s), 992 (s,  $C_{ar}-H$ ), 760 (s,  $C_{ar}-H$ ).

**MS** (ED):  $m/z$  (%) = 188 (100) [ $M-NO_2$ ] $^+$ , 146 (72) [ $M-NO_2-C_3H_6$ ] $^+$ , 132 (40) [ $C_9H_{10}N$ ] $^+$ .

**HRMS** (ESI): calcd for  $C_{13}H_{19}N_2O_2^+$  [ $M+H$ ] $^+$ : 235.1441; found: 235.1441.

**$^1H$  NMR** (500 MHz,  $CDCl_3$ ):  $\delta$  [ppm] 8.59–8.37 (m, 2H, H-5, H-6), 7.43 (dt,  $^3J = 7.9$  Hz,  $^4J = 2.0$  Hz, 1H, H-3), 7.31–7.27 (m, 1H, H-4), 4.90 (d,  $^3J = 10.0$  Hz, 1H, H-4'), 3.96 (d,

$^3J = 10.0$  Hz, 1H, H-1'), 1.25 (s, 3H, CH<sub>3</sub>-2'), 1.19 (s, 3H, CH<sub>3</sub>-3'), 1.16 (s, 3H, CH<sub>3</sub>-2'), 0.73 (s, 3H, CH<sub>3</sub>-3').

$^{13}\text{C}$  NMR (126 MHz, CDCl<sub>3</sub>):  $\delta$  [ppm] = 148.7 (d, C-6)\*, 148.6 (d, C-5)\*, 134.5 (d, C-3), 131.9 (s, C-2), 123.4 (d, C-4), 84.2 (d, C-4'), 47.4 (d, C-1'), 45.3 (s, C-3'), 39.4 (s, C-2'), 24.2 [q, (C-2')CH<sub>3</sub>], 22.7 [q, (C-3')CH<sub>3</sub>], 21.6 [q, (C-2')CH<sub>3</sub>], 19.3 [q, (C-3')CH<sub>3</sub>].

\* The assignment is interconvertible.

### 2-(2',2',3',3'-Tetramethyl-4'-nitrocyclobutyl)naphthalene (2n)

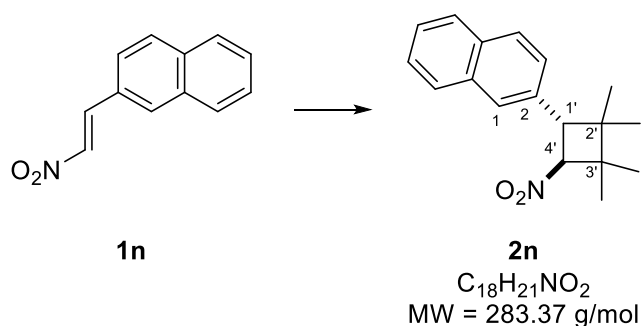

**Conditions A:** Following **GP 4**, a solution of nitroethene **1n** (19.9 mg, 100  $\mu\text{mol}$ , 1.00 equiv) and 2,3-dimethyl-2-butene (119  $\mu\text{L}$ , 84.2 mg, 1.00 mmol, 10.0 equiv) in dichloromethane (5 mL) was irradiated at  $\lambda = 419$  nm (fluorescent lamps) for three hours at room temperature. The crude product was purified by column chromatography (2  $\times$  15 cm, P/Et<sub>2</sub>O = 19/1) to yield **2n** (12.9 mg, 45.5  $\mu\text{mol}$ , 46%) as a yellow coloured oil.

**Conditions B:** Following **GP 4**, a solution of nitroethene **1n** (19.9 mg, 100  $\mu\text{mol}$ , 1.00 equiv) and 2,3-dimethyl-2-butene (119  $\mu\text{L}$ , 84.2 mg, 1.00 mmol, 10.0 equiv) in dichloromethane (5 mL) was irradiated at  $\lambda = 424$  nm (LED) for three hours at room temperature. The crude product was purified by column chromatography (2  $\times$  15 cm, P/Et<sub>2</sub>O = 19/1) to yield **2n** (12.6 mg, 44.7  $\mu\text{mol}$ , 44%) as a yellow coloured oil.

**Conditions C:** Following **GP 4**, a solution of nitroethene **1n** (19.9 mg, 100  $\mu\text{mol}$ , 1.00 equiv) and 2,3-dimethyl-2-butene (119  $\mu\text{L}$ , 84.2 mg, 1.00 mmol, 10.0 equiv) in dichloromethane (5 mL) was irradiated at  $\lambda = 424$  nm (LED) for three hours at  $-78$  °C. The crude product was purified by column chromatography (2  $\times$  15 cm, P/Et<sub>2</sub>O = 19/1) to yield **2n** (22.4 mg, 79.1  $\mu\text{mol}$ , 79%) as a yellow coloured oil.

**TLC:**  $R_f = 0.56$  (P/Et<sub>2</sub>O = 9/1) [UV, KMnO<sub>4</sub>].

**IR** (ATR):  $\tilde{\nu}$  [cm<sup>-1</sup>] = 2954 (m, C<sub>ar</sub>-H), 1537 (s, C-NO<sub>2</sub>), 1459 (m, C<sub>sp3</sub>-H), 1367 (m, C-NO<sub>2</sub>), 1139 (w), 858 (m, C<sub>ar</sub>-H), 810 (m, C<sub>ar</sub>-H), 755 (s, C<sub>ar</sub>-H).

**MS** (EI):  $m/z$  (%) = 237 (28) [M-NO<sub>2</sub>]<sup>+</sup>, 181 (100) [M-NO<sub>2</sub>-C<sub>4</sub>H<sub>8</sub>]<sup>+</sup>, 127 (10) [C<sub>10</sub>H<sub>7</sub>]<sup>+</sup>.

**HRMS** (ESI): calcd for C<sub>18</sub>H<sub>22</sub>NO<sub>2</sub><sup>+</sup> [M+H]<sup>+</sup>: 284.1645; found: 284.1646.

**<sup>1</sup>H NMR** (500 MHz, CDCl<sub>3</sub>): 7.85–7.79 (m, 3H, H<sub>ar</sub>)\*, 7.54–7.52 (br. s, 1H, H<sub>ar</sub>)\*, 7.51–7.43 (m, 2H, H<sub>ar</sub>)\*, 7.26–7.23 (m, 1H, H<sub>ar</sub>)\*, 5.06 (d, <sup>3</sup>J = 10.1 Hz, 1H, H-4'), 4.14 (d, <sup>3</sup>J = 10.1 Hz, 1H, H-1'), 1.28 (s, 3H, CH<sub>3</sub>-2'), 1.26 (s, 3H, CH<sub>3</sub>-3'), 1.20 (s, 3H, CH<sub>3</sub>-2'), 0.73 (s, 3H, CH<sub>3</sub>-3').

**<sup>13</sup>C NMR** (101 MHz, CDCl<sub>3</sub>):  $\delta$  [ppm] = 134.2 (s, C-2), 133.5 (s, C-10)\*, 132.6 (s, C-5)\*, 128.4 (d, C<sub>ar</sub>H)\*\*, 127.8 (d, C<sub>ar</sub>H)\*\*, 126.5 (d, C<sub>ar</sub>H)\*\*, 125.9 (d, C<sub>ar</sub>H)\*\*, 125.7 (d, C<sub>ar</sub>H)\*\*, 125.1 (d, C<sub>ar</sub>H)\*\*, 85.0 (d, C-4'), 49.6 (d, C-1'), 45.1 (s, C-3'), 39.5 (s, C-2'), 24.4 [q, (C-2')CH<sub>3</sub>], 22.8 [q, (C-3')CH<sub>3</sub>], 21.6 [q, (C-2')CH<sub>3</sub>], 19.5 [q, (C-3')CH<sub>3</sub>].

\* The assignment is interchangeable.

\*\* The exact assignment of these signals was not possible.

### 1-(Pent-4'-en-1'-yl)-2-(2'',2'',3'',3''-tetramethyl-4''-nitrocyclobutyl)-benzene (**2o**)

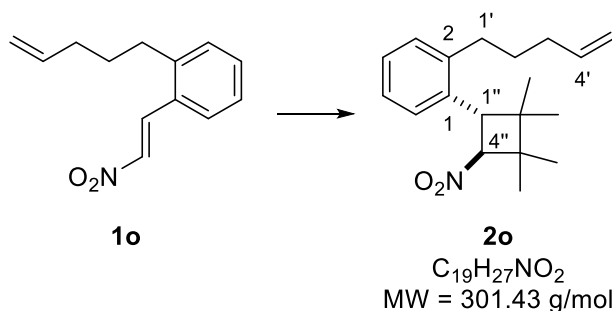

Following **GP 4**, a solution of nitroethene **1o** (21.7 mg, 100  $\mu$ mol, 1.00 equiv) and 2,3-dimethyl-2-butene (356  $\mu$ L, 252 mg, 3.00 mmol, 30.0 equiv) in dichloromethane (5 mL) was irradiated at  $\lambda = 419$  nm (fluorescent lamps) for 18 hours at room temperature. The crude product was purified by column chromatography (2  $\times$  10 cm, P/Et<sub>2</sub>O = 4/1) to yield **2o** (13.8 mg, 45.8  $\mu$ mol, 46%) as a yellow coloured oil.



**TLC:**  $R_f = 0.68$  (P/Et<sub>2</sub>O = 9/1) [UV, KMnO<sub>4</sub>].

**IR** (ATR):  $\tilde{\nu}$  [cm<sup>-1</sup>] = 3066 (w, C<sub>ar</sub>-H), 2931 (w, C-H), 2870 (w, C-H), 1542 (vs, C-NO<sub>2</sub>), 1460 (m), 1371 (s, C-NO<sub>2</sub>), 993 (w), 912 (m, R-CH-CH<sub>2</sub>), 751 (m, C<sub>ar</sub>-H).

**MS** (EI):  $m/z$  (%) = 301 (2) [M]<sup>+</sup>, 255 (20) [M-NO<sub>2</sub>]<sup>+</sup>, 199 (49) [M-NO<sub>2</sub>-C<sub>3</sub>H<sub>6</sub>]<sup>+</sup>, 143 (100) [C<sub>11</sub>H<sub>11</sub>]<sup>+</sup>

**HRMS** (ESI): calcd for C<sub>19</sub>H<sub>28</sub>NO<sub>2</sub><sup>+</sup> [M+H]<sup>+</sup>: 302.2115; found: 302.2115.

**<sup>1</sup>H NMR** (500 MHz, CDCl<sub>3</sub>):  $\delta$  [ppm] = 7.15–7.09 (m, 3H, H-3, H-4, H-5), 7.07–7.03 (m, 1H, H-6), 5.83 (ddt, <sup>3</sup>J = 17.0 Hz, 10.2 Hz, 6.7 Hz, 1H, H-4'), 5.02 (*virt. dq*, <sup>3</sup>J = 17.2 Hz, <sup>2</sup>J  $\cong$  <sup>4</sup>J = 1.7 Hz, 1H, CHH-5'), 4.98–4.92 (m, 2H, CHH-5', H-4''), 4.15 (d, <sup>3</sup>J = 10.2 Hz, 1H, H-1''), 2.76 (ddd, <sup>2</sup>J = 14.0 Hz, <sup>3</sup>J = 10.5 Hz, 5.3 Hz, 1H, CHH-1'), 2.46 (ddd, <sup>2</sup>J = 14.0 Hz, <sup>3</sup>J = 10.6 Hz, 6.0 Hz, 1H, CHH-1'), 2.19–2.03 (m, 2H, H-3'), 1.82–1.72 (m, 1H, CHH-2'), 1.70–1.58 (m, 1H, CHH-2'), 1.18 (s, 3H, CH<sub>3</sub>-3''), 1.10 (s, 3H, CH<sub>3</sub>-3''), 1.09 (s, 3H, CH<sub>3</sub>-2''), 0.67 (s, 3H, CH<sub>3</sub>-2'').

**<sup>13</sup>C NMR** (126 MHz, CDCl<sub>3</sub>):  $\delta$  [ppm] = 141.7 (s, C-1), 138.6 (d, C-4'), 133.2 (s, C-2), 129.8 (d, C-6), 127.1 (d, C-5)\*, 127.0 (d, C-3), 125.9 (d, C-4)\*, 115.3 (t, C-5'), 85.3 (d, C-4''), 45.6 (d, C-1''), 44.4 (s, C-2''), 40.1 (s, C-3''), 33.8 (t, C-3'), 32.4 (t, C-1'), 30.6 (t, C-2'), 24.6 [q, (C-2')CH<sub>3</sub>], 22.8 [q, (C-3')CH<sub>3</sub>], 21.8 [q, (C-2'')CH<sub>3</sub>], 19.4 [q, (C-3'')CH<sub>3</sub>].

## 5. Synthesis of olefins

### *cis*- $\beta$ -Methylstyrene (*cis*-14)

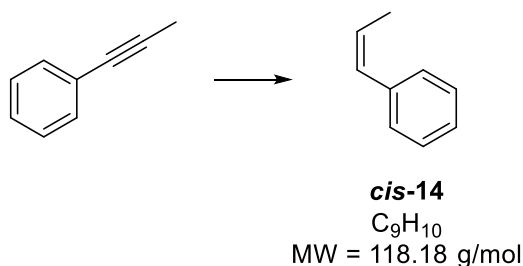

According to a literature known procedure:<sup>[13]</sup> Prop-1-yn-1-ylbenzene (900  $\mu$ L, 835 mg, 7.19 mmol, 1.00 equiv) and *Lindlar's* catalyst (500 mg) were suspended in 250 mL of freshly distilled cyclohexane. The flask was alternately evacuated and flushed with  $H_2$ -gas for four cycles to establish a saturated  $H_2$ -atmosphere inside the flask. The flask was charged with  $H_2$  ( $p = 1$  atm) and the suspension was stirred at room temperature. The reaction progress was monitored via TLC. After ten minutes, the suspension was filtered over a plug of CELITE<sup>®</sup> and the filtrate was concentrated *in vacuo* (note: due to the volatility of the product, the vacuum should not exceed 150 mbar!). The crude product was purified by column chromatography (5  $\times$  15 cm, P) to yield *cis*-14 (380 mg, 3.22 mmol, 45%) as a colorless liquid.

**TLC:**  $R_f = 0.62$  (P) [UV,  $KMnO_4$ ].

**$^1H$  NMR** (300 MHz,  $CDCl_3$ ):  $\delta$  [ppm] = 7.39–7.28 (m, 4H,  $H_{Ph}$ ), 7.26–7.20 (m, 1H,  $H_{Ph}$ ), 6.45 (d,  $^3J = 11.6$  Hz, 1H,  $PhCH$ ), 5.80 (dq,  $^3J = 11.6$ , 7.2 Hz, 1H,  $PhCH=CHCH_3$ ), 1.91 (d,  $^3J = 7.2$  Hz, 3H,  $CH_3$ ).

**$^{13}C$  NMR** (101 MHz,  $CDCl_3$ ):  $\delta$  [ppm] = 137.8 (s,  $C_{Ph}$ ), 130.0 (d,  $C_{PhH}$ ), 128.9 (d, 2C,  $C_{PhH}$ ), 128.3 (d, 2C,  $C_{PhH}$ ), 126.9 (d, ArCH), 126.5 (d, ArCH= $CHCH_3$ ), 14.8 (q,  $CH_3$ ).

The analytical data match those reported in the literature.<sup>[13]</sup>

## (1-Cyclopropylvinyl)benzene

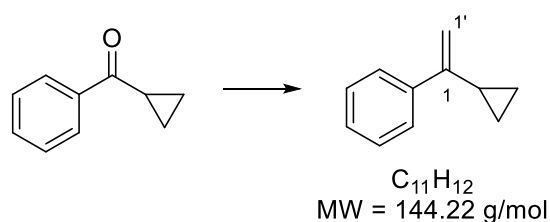

According to a literature known procedure:<sup>[14]</sup> NaH (547 mg, 27.4 mmol, 2.00 equiv; 60 wt-% in mineral oil) was washed with pentane (4 × 10 mL). The flask was deoxygenated by alternately evacuating and flushing with argon for three cycles. The white powder was dissolved in dimethylsulfoxide (12 mL) and heated to 85 °C, until the evolution of gas ceased. Methyltriphenylphosphonium bromide (9.77 g, 27.4 mmol, 2.00 equiv) was dissolved in warm dimethylsulfoxide (13 mL). The NaH-Suspension was cooled to 0 °C, and the solution of the *Wittig* salt was added quickly to avoid freezing of the solvent. The yellow coloured reaction suspension was stirred at room temperature for ten minutes. Subsequently, a solution of cyclopropyl(phenyl)methanone (1.89 mL, 2.00 g, 13.7 mmol, 1.00 equiv) in dimethylsulfoxide (10 mL) was added, and the resulting orange coloured suspension was stirred for one hour at room temperature. Water (50 mL) was added, and the reaction mixture was partitioned between water and pentane (200 ml). The aqueous layer was extracted with large excess of pentane (2 × 200 mL). The combined organic layers were washed with saturated aqueous NaCl solution (700 mL), dried over Na<sub>2</sub>SO<sub>4</sub>, filtered and concentrated *in vacuo* (note: due to the volatility of the product, the vacuum should not exceed 500 mbar!). The crude product was taken up in pentane (50 mL) and filtered over silica. The silica plug was washed carefully with pentane (50 mL) and the filtrate was again concentrated *in vacuo* (> 500 mbar) to yield (1-cyclopropylvinyl)-benzene (880 mg, 7.70 mmol, 47%) as a colorless liquid.

**<sup>1</sup>H NMR** (300 MHz, CDCl<sub>3</sub>): δ [ppm] = 7.64–7.56 (m, 2H, H<sub>Ph</sub>), 7.39–7.27 (m, 3H, H<sub>Ph</sub>), 5.28 (d, <sup>2</sup>J = 1.1 Hz, 1H, CHH-1'), 4.94 (*virt. t.*, <sup>4</sup>J ≅ <sup>2</sup>J = 1.2 Hz, 1H, CHH-1'), 1.66 [tt, <sup>3</sup>J = 8.3 Hz, 5.4 Hz, <sup>4</sup>J = 1.3 Hz, 1H, CH(CH<sub>2</sub>)<sub>2</sub>], 0.97–0.79 [m, 2H, CH(CH<sub>2</sub>)<sub>2</sub>], 0.66–0.52 [m, 2H, CH(CH<sub>2</sub>)<sub>2</sub>].

**<sup>13</sup>C NMR** (101 MHz, CDCl<sub>3</sub>): δ [ppm] = 149.5 (s, C=CH<sub>2</sub>), 141.8 (s, C<sub>Ph</sub>), 128.3 (d, 2C, C<sub>Ph</sub>H), 127.6 (d, C<sub>Ph</sub>H), 126.3 (d, 2C, C<sub>Ph</sub>H), 109.2 (t, C=CH<sub>2</sub>), 15.8 [d, CH(CH<sub>2</sub>)<sub>2</sub>], 6.82 [t, 2C, CH(CH<sub>2</sub>)<sub>2</sub>].

The analytical data match those reported in the literature.<sup>[15]</sup>

### [(3,3-Dimethylbut-1-en-2-yl)oxy]trimethylsilane

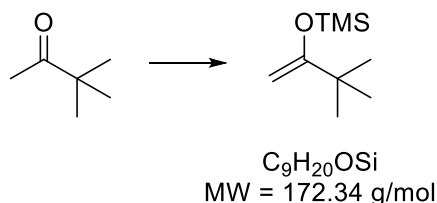

According to a literature known procedure:<sup>[16]</sup> TMSCl (1.51 mL, 1.30 g, 12.0 mmol, 1.20 equiv) was added dropwise over a period of ten minutes to a solution of pinacolone (1.25 mL, 1.00 g, 9.98 mmol, 1.00 equiv) and dry triethylamine (1.66 mL, 1.21 g, 12.0 mmol, 1.20 equiv) in acetonitrile (20 mL). Subsequently, a solution of NaI (1.95 g, 13.0 mmol, 1.30 equiv) in acetonitrile (20 mL) was added. The suspension was stirred for four hours at room temperature and the reaction was quenched by the addition of cold water (50 mL) and cold pentane (40 mL). The resulting three layers were separated, and the aqueous layer was extracted with pentane ( $3 \times 50$  mL). The combined organic layers (acetonitrile and pentane) were washed with water, until a neutral pH was reached. The organic layer was washed with saturated aqueous NaCl solution (250 mL), dried over  $Na_2SO_4$ , filtered and concentrated *in vacuo*. The crude product was purified by distillation over a *Vigreux* column ( $\emptyset = 1.5$  cm,  $h = 10$  cm) to yield [(3,3-dimethylbut-1-en-2-yl)oxy]trimethylsilane (800 mg, 4.64 mmol, 47%) as a colorless liquid.

**bp:** 138–145 °C [ $p = 1013$  mbar].

**$^1H$  NMR** (500 MHz,  $CDCl_3$ ):  $\delta$  [ppm] = 4.08 (d,  $^2J = 1.3$  Hz, 1H, *CHH*), 3.93 (d,  $^2J = 1.3$  Hz, 1H, *CHH*), 1.05 [s, 9H,  $Si(CH_3)_3$ ], 0.21 [s, 9H,  $C(CH_3)_3$ ].

**$^{13}C$  NMR** (101 MHz,  $CDCl_3$ ):  $\delta$  [ppm] = 167.4 (s, C-2), 85.9 (t,  $CH_2$ ), 36.6 [s,  $C(CH_3)_3$ ], 28.2 [q,  $C(CH_3)_3$ ], 0.32 [q,  $OSi(CH_3)_3$ ].

The analytical data match those reported in the literature.<sup>[16]</sup>

## 1,1-Dicyclopropylethylene

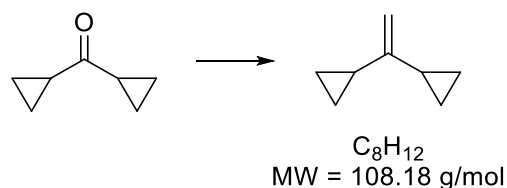

According to a literature known procedure:<sup>[14]</sup> NaH (1.65 g, 41.3 mmol, 0.91 equiv; 60 wt-% in mineral oil) were washed with pentane ( $4 \times 10$  mL). The flask was deoxygenated by alternately evacuating and flushing with argon for three cycles. The white powder was dissolved in dimethylsulfoxide (25 mL) and heated to 85 °C, until the evolution of gas ceased. Methyltriphenylphosphonium bromide (14.2 g, 41.3 mmol, 0.91 equiv) was dissolved in warm dimethylsulfoxide (25 mL). The NaH-suspension was cooled to 0 °C, and the solution of the *Wittig* salt was added quickly to avoid freezing of the solvent. The yellow coloured reaction suspension was stirred at room temperature for ten minutes. Subsequently, a solution of dicyclopropylmethanone (5.15 mL, 5.00 g, 45.4 mmol, 1.00 equiv) in dimethylsulfoxide (50 mL) was added, and the resulting orange coloured suspension was stirred for one hour at room temperature. The product was distilled directly from the reaction mixture ( $T = 120$  °C,  $p = 120 - 60$  mbar) and subsequently filtered over silica to remove the residual dimethylsulfoxide, yielding 1,1-dicyclopropylethylene (3.81 g, 776 mmol, 78%) as a colorless liquid.

**bp:** ~ 125 °C [ $p = 120 - 60$  mbar].

**$^1H$  NMR** (300 MHz,  $CDCl_3$ ):  $\delta$  [ppm] = 4.58 (t,  $^4J = 0.6$  Hz, 2H,  $CH_2$ ), 1.30 [tt,  $^3J = 8.2, 5.2$  Hz, 2H,  $CH(CH_2)_2$ ], 0.66–0.57 [m, 4H,  $CH(CH_2)_2$ ], 0.56–0.49 [m, 4H,  $CH(CH_2)_2$ ].

**$^{13}C$  NMR** (101 MHz,  $CDCl_3$ ):  $\delta$  [ppm] = 152.1 (s,  $CH_2=C$ ), 104.5 (t,  $CH_2=C$ ), 15.3 [d, 2C,  $CH(CH_2)_2$ ], 5.81 [t, 4C,  $CH(CH_2)_2$ ].

The analytical data match those reported in the literature.<sup>[17]</sup>

## (Cyclopent-1-en-1-yloxy)trimethylsilane

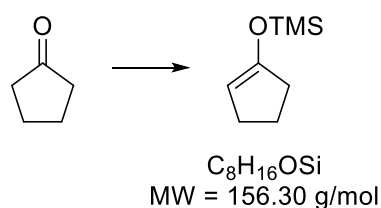

According to a literature known procedure:<sup>[18]</sup> Cyclopentanone (1.05 mL, 1.00 g, 11.9 mmol, 1.00 equiv) and triethylamine (2.07 mL, 1.50 g, 14.9 mmol, 1.15 equiv) were added to a solution of NaI (2.23 g, 14.9 mmol, 1.25 equiv) in acetonitrile (18 mL). TMSCl (1.74 mL, 1.49 g, 13.7 mmol, 1.15 equiv) was added dropwise over a period of 30 minutes. The suspension was stirred for two hours at room temperature. The reaction mixture was partitioned between acetonitrile and pentane (20 mL). The acetonitrile layer was extracted with pentane (3 × 20 mL). The combined pentane layers were washed with water, until a neutral pH was reached. Subsequently, the pentane layer was washed with saturated aqueous NaCl solution (100 mL), dried over Na<sub>2</sub>SO<sub>4</sub>, filtered and concentrated *in vacuo*. The crude product was purified by *Kugelrohr* distillation to yield (cyclopent-1-en-1-yloxy)trimethylsilane (1.53 g, 9.79 mmol, 82%) as a colorless liquid.

**bp:** 50 °C [p = 10 mbar].

**<sup>1</sup>H NMR** (500 MHz, CDCl<sub>3</sub>): δ [ppm] = 4.66–4.58 (m, 1H, CH<sub>2</sub>CH=C), 2.28–2.24 (m, 4H, CH<sub>2</sub>), 1.91–1.76 (m, 2H, CH<sub>2</sub>), 0.20 [s, 9H, OSi(CH<sub>3</sub>)<sub>3</sub>].

**<sup>13</sup>C NMR** (101 MHz, CDCl<sub>3</sub>): δ [ppm] = 155.2 (s, C-1), 102.3 (d, C-2), 33.7 (t, CH<sub>2</sub>), 28.9 (t, CH<sub>2</sub>), 21.5 (t, CH<sub>2</sub>), 0.19 [q, OSi(CH<sub>3</sub>)<sub>3</sub>].

The analytical data match those reported in the literature.<sup>[18]</sup>

## 6. [2+2] photocycloaddition of nitroethene **1a** to different olefins

The analytical data for nitrocyclobutanes **3a** and **3b** have already been published in a communication.<sup>[2]</sup>

### General Procedure 5 (GP 5) for the [2+2] photocycloaddition of *trans*- $\beta$ -nitrostyrene **1a** with different olefins

A solution of *trans*- $\beta$ -nitrostyrene **1a** (1.00 equiv) and the olefin (10.0 equiv) in dichloromethane ( $c = 20$  mM) was irradiated with visible light (the wavelength  $\lambda$  [nm] of the light source is indicated for each reaction individually) at room temperature or at  $-78$  °C. The progress of the reaction was monitored by TLC. After full conversion was reached, irradiation was stopped, and the solvent was removed *in vacuo*. In some cases, the reaction was stopped when the TLC did not indicate any further consumption of the starting material over a period of two to three hours. The crude product was dry loaded onto CELITE<sup>®</sup> and purified by column chromatography.

### 2-Nitro-1-phenylspiro[3.5]nonane (**3a**)

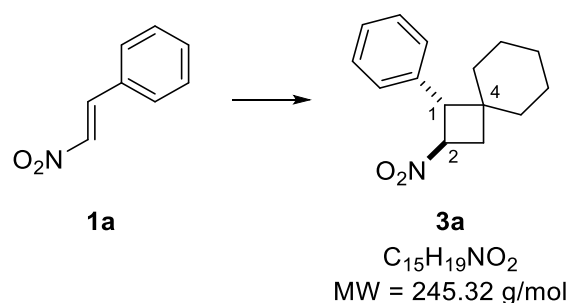

**Conditions A:** Following **GP 5**, a solution of nitroethene **1a** (29.8 mg, 200  $\mu$ mol, 1.00 equiv) and methylenecyclohexane (240  $\mu$ L, 192 mg, 2.00 mmol, 10.0 equiv) in dichloromethane (10 mL) was irradiated at  $\lambda = 419$  nm (fluorescent lamps) for 14 hours at room temperature (at that point, no further conversion was observed). The crude product was purified by column chromatography ( $2 \times 10$  cm, P/Et<sub>2</sub>O = 19/1) to yield **3a** (24.7 mg, 1.01 mmol, 51%) as a colorless oil. Starting material was recovered as *trans*-isomer *trans*-**1a** (6.00 mg, 40.2  $\mu$ mol, 20%).

**Conditions B:** Following **GP 5**, a solution of nitroethene **1a** (14.9 mg, 100  $\mu$ mol, 1.00 equiv) and methylenecyclohexane (136  $\mu$ L, 96.1 mg, 1.00 mmol, 10.0 equiv) in dichloromethane

(5 mL) was irradiated at  $\lambda = 424$  nm (LED) for 14 hours at room temperature (at that point, no further conversion was observed). The crude product was purified by column chromatography ( $2 \times 15$  cm, P/Et<sub>2</sub>O = 19/1) to yield **3a** (11.8 mg, 48.1  $\mu$ mol, 48%) as a colorless oil. Starting material **1a** was recovered as mixture of isomers (1.65 mg, 11.1  $\mu$ mol, 11%, *cis/trans* = 12/88).

**Conditions C:** Following **GP 5**, a solution of nitroethene **1a** (14.9 mg, 100  $\mu$ mol, 1.00 equiv) and methylenecyclohexane (136  $\mu$ L, 96.1 mg, 1.00 mmol, 10.0 equiv) in dichloromethane (5 mL) was irradiated at  $\lambda = 424$  nm (LED) for 14 hours at  $-78$  °C (at that point, no further conversion was observed). The crude product was purified by column chromatography ( $2 \times 15$  cm, P/Et<sub>2</sub>O = 19/1) to yield **3a** (15.0 mg, 61.9  $\mu$ mol, 61%, 98% *brsm*) as a colorless oil. Starting material **1a** was recovered as mixture of isomers (6.64 mg, 42.9  $\mu$ mol, 43%, *cis/trans* = 12:88).

The analytical data match those reported in the literature.<sup>[2]</sup>

### 6-Nitro-7-phenyl-2-oxabicyclo[3.2.0]heptane (**3b**)

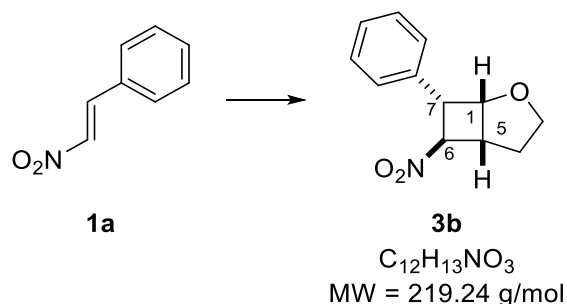

**Conditions A:** Following **GP 5**, a solution of nitroethene **1a** (29.8 mg, 200  $\mu$ mol, 1.00 equiv) and 2,3-dihydrofuran (152  $\mu$ L, 140 mg, 2.00 mmol, 10.0 equiv) in dichloromethane (10 mL) was irradiated at  $\lambda = 419$  nm (fluorescent lamps) for six hours at room temperature (at that point, no further conversion was observed). The crude product was purified by column chromatography ( $2 \times 10$  cm, P/Et<sub>2</sub>O = 9/1  $\rightarrow$  4/1) to yield **3b** (15.7 mg, 71.6  $\mu$ mol, 36%) as a yellow coloured oil. Starting material was recovered as *cis*-isomer *cis-1a* (2.30 mg, 15.2  $\mu$ mol, 8%).

**Conditions B:** Following **GP 5**, a solution of nitroethene **1a** (14.9 mg, 100  $\mu$ mol, 1.00 equiv) and 2,3-dihydrofuran (75.5  $\mu$ L, 70.0 mg, 1.00 mmol, 10.0 equiv) in dichloromethane (5 mL) was irradiated at  $\lambda = 424$  nm (LED) for six hours at room temperature (at that point, no further



conversion was observed). The crude product was purified by column chromatography ( $2 \times 12$  cm, P/Et<sub>2</sub>O = 9/1  $\rightarrow$  4/1) to yield **3b** (8.10 mg, 36.9  $\mu$ mol, 37%) as a yellow coloured oil. Starting material was recovered as *cis*-isomer *cis*-**1a** (2.00 mg, 13.4  $\mu$ mol, 13%).

**Conditions C:** Following **GP 5**, a solution of nitroethene **1a** (14.9 mg, 100  $\mu$ mol, 1.00 equiv) and 2,3-dihydrofuran (75.5  $\mu$ L, 70.0 mg, 1.00 mmol, 10.0 equiv) in dichloromethane (5 mL) was irradiated at  $\lambda = 424$  nm (LED) for six hours at  $-78$  °C (at that point, no further conversion was observed). The crude product was purified by column chromatography ( $2 \times 12$  cm, P/Et<sub>2</sub>O = 9/1  $\rightarrow$  4/1) to yield the product **3b** (6.00 mg, 27.4  $\mu$ mol, 27%) as yellow coloured oil. Starting material **1a** was recovered as a mixture of isomers (6.60 mg, 44.3  $\mu$ mol, 44%, *cis/trans* = 64:36).

The analytical data match those reported in the literature.<sup>[2]</sup>

#### (2,2-Diethyl-4-nitrocyclobutyl)-benzene (**3c**)

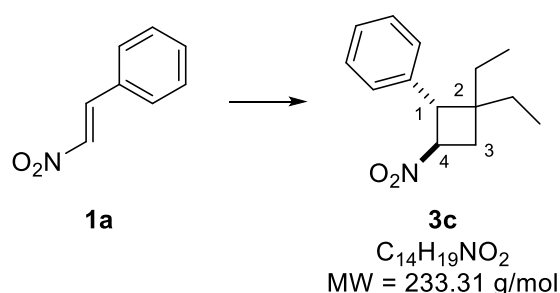

**Conditions A:** Following **GP 5**, a solution of nitroethene **1a** (29.8 mg, 200  $\mu$ mol, 1.00 equiv) and 1,1-diethylethylene (244  $\mu$ L, 168 mg, 2.00 mmol, 10.0 equiv) in dichloromethane (10 mL) was irradiated at  $\lambda = 419$  nm (fluorescent lamps) for 14 hours at room temperature (at that point, no further conversion was observed). The crude product was purified by column chromatography ( $2 \times 15$  cm, P/Et<sub>2</sub>O = 30/1) to yield **3c** (20.7 mg, 88.7  $\mu$ mol, 44%) as a yellow coloured oil. Starting material **1a** was recovered as a mixture of isomers (4.70 mg, 31.5  $\mu$ mol, 16%, *cis/trans* = 44:56).

**Conditions B:** Following **GP 5**, a solution of nitroethene **1a** (14.9 mg, 100  $\mu$ mol, 1.00 equiv) and 1,1-diethylethylene (122  $\mu$ L, 84.1 mg, 1.00 mmol, 10.0 equiv) in dichloromethane (5 mL) was irradiated at  $\lambda = 424$  nm (LED) for 14 hours at room temperature (at that point, no further conversion was observed). The crude product was purified by column chromatography

(2 × 15 cm, P/Et<sub>2</sub>O = 30/1) to yield **3c** (5.80 mg, 24.9 μmol, 25%) as a yellow coloured oil. Starting material **1a** was recovered as a mixture of isomers (9.50 mg, 63.7 μmol, 63%, *cis/trans* = 44:56).

**Conditions C:** Following **GP 5**, a solution of nitroethene **1a** (14.9 mg, 100 μmol, 1.00 equiv) and 1,1-diethylethylene (122 μL, 84.1 mg, 1.00 mmol, 10.0 equiv) in dichloromethane (5 mL) was irradiated at λ = 424 nm (LED) for 14 hours at -78 °C (at that point, no further conversion was observed). The crude product was purified by column chromatography (2 × 15 cm, P/Et<sub>2</sub>O = 30/1) to yield **3c** (7.50 mg, 32.2 μmol, 32%) as a yellow coloured oil. Starting material **1a** was recovered as a mixture of isomers (5.70 mg, 38.2 μmol, 38%, *cis/trans* = 36:64).

**TLC:** *R*<sub>f</sub> = 0.45 (P/Et<sub>2</sub>O = 19/1) [KMnO<sub>4</sub>].

**IR (ATR):**  $\tilde{\nu}$  [cm<sup>-1</sup>] = 3063 (w, C<sub>ar</sub>-H), 3030 (w, C<sub>ar</sub>-H), 2965 (w, C-H), 1542 (vs, C-NO<sub>2</sub>), 1455 (m, C<sub>sp3</sub>-H), 1366 (m, C-NO<sub>2</sub>), 784 (m, C<sub>ar</sub>-H).

**MS (EI):** *m/z* (%) = 187 (4) [M-NO<sub>2</sub>]<sup>+</sup>, 157 (12) [M-NO<sub>2</sub>-C<sub>2</sub>H<sub>6</sub>]<sup>+</sup>, 117 (100) [C<sub>9</sub>H<sub>9</sub>]<sup>+</sup>.

**HRMS (ESI):** calcd for C<sub>14</sub>H<sub>20</sub>NO<sub>2</sub><sup>+</sup> [M+H]<sup>+</sup>: 234.1488; found: 234.1489.

**<sup>1</sup>H NMR** (500 MHz, CDCl<sub>3</sub>): δ [ppm] = 7.34 (t, <sup>3</sup>*J* = 7.5 Hz, 2H, *meta*-H<sub>ar</sub>), 7.29–7.24 (m, 1H, *para*-H<sub>ar</sub>), 7.23–7.20 (m, 2H, *ortho*-H<sub>ar</sub>), 5.27 (*virt.* q, <sup>3</sup>*J* ≅ <sup>3</sup>*J* = 8.7 Hz, 1H, H-4'), 3.98 (d, <sup>3</sup>*J* = 9.1 Hz, 1H, H-1'), 2.40 (dd, <sup>2</sup>*J* = 11.9 Hz, <sup>3</sup>*J* = 8.5 Hz, 1H, *CHH*-3), 2.30 (dd, <sup>2</sup>*J* = 11.9 Hz, <sup>3</sup>*J* = 8.6 Hz, 1H, *CHH*-3), 1.76 (dq, <sup>2</sup>*J* = 14.8 Hz, <sup>3</sup>*J* = 7.5 Hz, 1H, *CHHCH*<sub>3</sub>), 1.64 (dq, <sup>2</sup>*J* = 14.8 Hz, <sup>3</sup>*J* = 7.5 Hz, 1H, *CHHCH*<sub>3</sub>), 1.30–1.19 (m, 2H, *CH*<sub>2</sub>*CH*<sub>3</sub>), 0.96 (t, <sup>3</sup>*J* = 7.5 Hz, 3H, *CH*<sub>2</sub>*CH*<sub>3</sub>), 0.60 (t, <sup>3</sup>*J* = 7.4 Hz, 3H, *CH*<sub>2</sub>*CH*<sub>3</sub>).

**<sup>13</sup>C NMR** (126 MHz, CDCl<sub>3</sub>): δ [ppm] = 136.6 (s, C<sub>ar</sub>), 128.6 (d, 2C, *meta*-C<sub>ar</sub>H), 127.5 (d, 2C, *ortho*-C<sub>ar</sub>H), 127.2 (d, *para*-C<sub>ar</sub>H), 76.6 (d, C-4'), 53.8 (d, C-1'), 41.8 (s, C-2'), 33.7 (t, C-3'), 31.7 (t, *CH*<sub>2</sub>*CH*<sub>3</sub>), 26.4 (t, *CH*<sub>2</sub>*CH*<sub>3</sub>), 8.62 (q, *CH*<sub>2</sub>*CH*<sub>3</sub>), 7.98 (q, *CH*<sub>2</sub>*CH*<sub>3</sub>).

### 1-Nitro-2-phenyl-1,2,2a,7b-tetrahydrocyclobuta[b]benzofuran (**3d**)

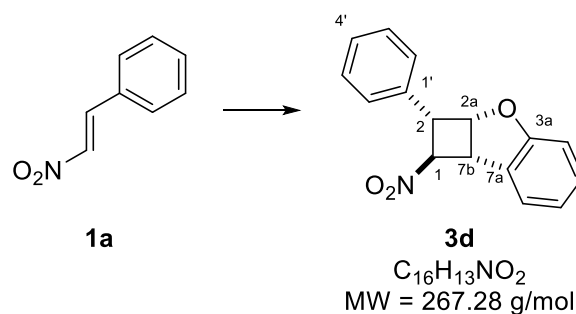

**Conditions A:** Following **GP 5**, a solution of nitroethene **1a** (14.9 mg, 100  $\mu$ mol, 1.00 equiv) and benzofurane (108  $\mu$ L, 118 mg, 1.00 mmol, 10.0 equiv) in dichloromethane (5 mL) was irradiated at  $\lambda = 419$  nm (fluorescent lamps) for 36 hours at room temperature (at that point, no further conversion was observed). The crude product was purified by column chromatography (2  $\times$  15 cm, P/Et<sub>2</sub>O = 20/1) to yield **3d** (12.5 mg, 46.7  $\mu$ mol, 47%) as a yellow coloured oil. Starting material was recovered as *cis*-isomer *cis*-**1a** (2.0 mg, 13.4  $\mu$ mol, 13%).

**Conditions B:** Following **GP 5**, a solution of nitroethene **1a** (14.9 mg, 100  $\mu$ mol, 1.00 equiv) and benzofurane (108  $\mu$ L, 118 mg, 1.00 mmol, 10.0 equiv) in dichloromethane (5 mL) were irradiated at  $\lambda = 424$  nm (LED) for 36 hours at room temperature (at that point, no further conversion was observed). The crude product was purified by column chromatography (2  $\times$  15 cm, P/Et<sub>2</sub>O = 20/1) to yield **3d** (12.8 mg, 47.9  $\mu$ mol, 48%) as a yellow coloured oil. Starting material was recovered as *cis*-isomer *cis*-**1a** (5.40 mg, 36.2  $\mu$ mol, 36%).

**Conditions C:** Following **GP 5**, a solution of nitroethene **1a** (14.9 mg, 100  $\mu$ mol, 1.00 equiv) and benzofurane (108  $\mu$ L, 118 mg, 1.00 mmol, 10.0 equiv) in dichloromethane (5 mL) were irradiated at  $\lambda = 424$  nm (LED) for 36 hours at  $-78$  °C (at that point, no further conversion was observed). The crude product was purified by column chromatography (2  $\times$  15 cm, P/Et<sub>2</sub>O = 20/1) to yield **3d** (8.60 mg, 32.2  $\mu$ mol, 32%) as a yellow coloured oil. Starting material was recovered as *cis*-isomer *cis*-**1a** (6.70 mg, 44.9  $\mu$ mol, 45%).

**TLC:**  $R_f = 0.53$  (P/Et<sub>2</sub>O = 9/1) [UV, KMnO<sub>4</sub>].

**IR** (ATR):  $\tilde{\nu}$  [cm<sup>-1</sup>] = 3062 (w, C<sub>ar</sub>-H), 3032 (w, C<sub>ar</sub>-H), 2923 (w, C-H), 1543 (vs, C-NO<sub>2</sub>), 1474 (m), 1368 (m, C-NO<sub>2</sub>), 1218 (m), 1095 (s, C-O-C), 1051 (m), 1019 (s), 814 (m, C<sub>ar</sub>-H).

**MS** (EI):  $m/z$  (%) = 221 (12) [M-NO<sub>2</sub>]<sup>+</sup>, 118 (100) [C<sub>8</sub>H<sub>6</sub>O]<sup>+</sup>, 90 (8).

**HRMS** (ESI): calcd for C<sub>16</sub>H<sub>14</sub>NO<sub>3</sub><sup>+</sup> [M+H]<sup>+</sup>: 268.0968; found: 268.0970.

**<sup>1</sup>H NMR** (500 MHz, C<sub>6</sub>D<sub>6</sub>): δ [ppm] = 6.98–6.96 (m 3H, *meta*-H<sub>ar</sub>, *para*-H<sub>ar</sub>), 6.84 (t, <sup>3</sup>J = 7.5 Hz, 1H, H-5), 6.79 (d, <sup>3</sup>J = 7.5 Hz, 1H, H-4), 6.61–6.56 (m, 2H, *ortho*-H<sub>ar</sub>), 6.45 (t, <sup>3</sup>J = 7.5 Hz, 1H, H-6), 6.29 (d, <sup>3</sup>J = 7.5 Hz, 1H, H-7), 5.13 (dd, <sup>3</sup>J = 7.4 Hz, 4.2 Hz, 1H, H-2a), 4.97 (ddd, <sup>3</sup>J = 9.4 Hz, 4.2 Hz, <sup>4</sup>J = 1.5 Hz, 1H, H-1), 3.72 (*virt. t.*, <sup>3</sup>J ≅ <sup>3</sup>J = 9.3 Hz, 1H, H-2), 3.50 (*virt. t.*, <sup>3</sup>J ≅ <sup>3</sup>J = 8.4 Hz, 1H, H-7b).

**<sup>13</sup>C NMR** (101 MHz, C<sub>6</sub>D<sub>6</sub>): δ [ppm] = 160.9 (s, C-3a), 135.4 (s, C-2'), 129.6 (d, C-5), 128.6 (d, *meta*-C<sub>ar</sub>H/*para*-C<sub>ar</sub>H)\*, 128.3 (d, C-7), 127.9 (d, *meta*-C<sub>ar</sub>H/*para*-C<sub>ar</sub>H)\*, 127.6 (d, 2C, *ortho*-C<sub>ar</sub>H)\*, 124.9 (s, C-7a), 121.6 (d, C-6), 111.5 (d, C-4), 85.6 (d, C-1), 80.6 (d, C-2a), 45.6 (d, C-2), 44.6 (d, C-7b).

\* The exact assignment of these signals was not possible due to the large overlap with the signal of the solvent C<sub>6</sub>D<sub>6</sub>.

significant NOE contacts:

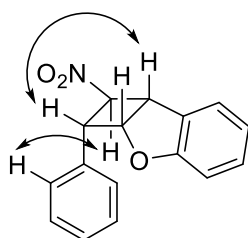

### 7-Nitro-8-phenyl-2,5-dioxabicyclo[4.2.0]octane (**3e**)

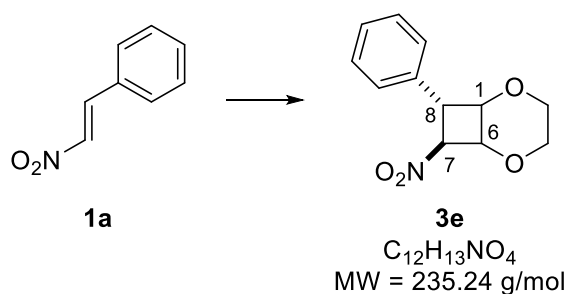

**Conditions A:** Following **GP 5**, a solution of nitroethene **1a** (29.8 mg, 200 μmol, 1.00 equiv) and 2,3-dihydro-1,4-dioxine (159 μL, 172 mg, 2.00 mmol, 10.0 equiv) in dichloromethane (10 mL) was irradiated at λ = 419 nm (fluorescent lamps) for twelve hours at room temperature (at that point, no further conversion was observed). The crude product was purified by column chromatography (2 × 15 cm, P/Et<sub>2</sub>O = 9/1 → 4/1) to yield **3e** (34.0 mg, 145 μmol, 72%, d.r. = 52:19:29) as an orange coloured oil. Starting material **1a** was recovered as a mixture of isomers (4.50 mg, 30.2 μmol, 15%, *cis/trans* = 55:45).

**Conditions B:** Following **GP 5**, a solution of nitroethene **1a** (14.9 mg, 100  $\mu\text{mol}$ , 1.00 equiv) and 2,3-dihydro-1,4-dioxine (80.0  $\mu\text{L}$ , 86 mg, 1.00 mmol, 10.0 equiv) in dichloromethane (5 mL) was irradiated at  $\lambda = 424$  nm (LED) for twelve hours at room temperature. The crude product was purified by column chromatography ( $2 \times 15$  cm, P/Et<sub>2</sub>O = 9/1  $\rightarrow$  4/1) to yield **3e** (12.7 mg, 54.0  $\mu\text{mol}$ , 54%, d.r. = 58:19:23) as an orange coloured oil. Starting material **1a** was recovered as a mixture of isomers (5.00 mg, 33.5  $\mu\text{mol}$ , 34%, *cis/trans* = 55/45).

**Conditions C:** Following **GP 5**, a solution of nitroethene **1a** (14.9 mg, 100  $\mu\text{mol}$ , 1.00 equiv) and 2,3-dihydro-1,4-dioxine (80.0  $\mu\text{L}$ , 86 mg, 1.00 mmol, 10.0 equiv) in dichloromethane (5 mL) was irradiated at  $\lambda = 424$  nm (LED) for twelve hours at  $-78$  °C. The crude product was purified by column chromatography ( $2 \times 15$  cm, P/Et<sub>2</sub>O = 9/1  $\rightarrow$  4/1) to yield **3e** (6.1 mg, 25.9  $\mu\text{mol}$ , 26%, d.r. = 58:19:23) as an orange coloured oil. Starting material **1a** was recovered as a mixture of isomers (5.90 mg, 39.6  $\mu\text{mol}$ , 39%, *cis/trans* = 54/46).

**TLC:**  $R_f = 0.06$  (P/Et<sub>2</sub>O = 4/1) [UV, KMnO<sub>4</sub>].

**IR** (ATR):  $\tilde{\nu}$  [ $\text{cm}^{-1}$ ] = 3031 (w, C<sub>ar</sub>-H), 2923 (w, C<sub>ar</sub>-H), 1545 (s, C-NO<sub>2</sub>), 1375 (m, C-NO<sub>2</sub>), 1132 (m, C-O-C), 1043 (m), 874 (m, C<sub>ar</sub>-H), 751 (m, C<sub>ar</sub>-H).

**HRMS** (ESI): calcd for C<sub>12</sub>H<sub>14</sub>NO<sub>4</sub><sup>+</sup> [M+H]<sup>+</sup>: 236.0917; found.: 236.0918.

**3e:**

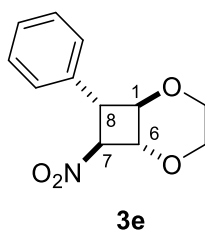

**MS** (EI):  $m/z$  (%) = 235 (16) [M]<sup>+</sup>, 189 (52) [M-NO<sub>2</sub>]<sup>+</sup>, 117 (72) [C<sub>9</sub>H<sub>9</sub>]<sup>+</sup>, 91 (100) [C<sub>7</sub>H<sub>7</sub>]<sup>+</sup>.

**<sup>1</sup>H NMR** (400 MHz, C<sub>6</sub>D<sub>6</sub>):  $\delta$  [ppm] = 7.02–6.93 (m, 5H, H<sub>ar</sub>), 4.26 (*virt. t.*,  $^3J \cong ^3J = 7.8$  Hz, 1H, H-7), 3.81 (*virt. t.*,  $^3J \cong ^3J = 8.6$  Hz, 1H, H-6), 3.56 (dd,  $^3J = 9.8$  Hz, 7.3 Hz, 1H, H-8), 3.40–3.28 (m, 2H, CHH-3, CHH-4), 3.19–3.15 (m, 2H, CHH-3, CHH-4), 2.99 (d,  $^3J = 9.8$  Hz, 1H, H-1).

**$^{13}\text{C}$  NMR** (101 MHz,  $\text{C}_6\text{D}_6$ ):  $\delta$  [ppm] = 136.5 (s,  $\text{C}_{\text{ar}}$ ), 129.0 (d, 2C, *ortho*- $\text{C}_{\text{arH}}$ )\*, 127.9 (d, 2C, *meta*- $\text{C}_{\text{arH}}$ )\*, 126.9 (d, *para*- $\text{C}_{\text{arH}}$ ), 82.3 (d, C-7), 77.9 (d, C-6), 75.2 (d, C-1), 68.3 (t, C-3), 68.1 (t, C-4), 51.2 (d, C-8).

\* The assignments are interconvertible.

significant NOE contacts:

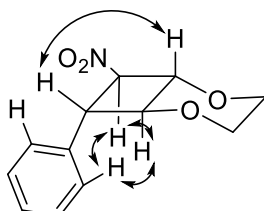

**3e'**:

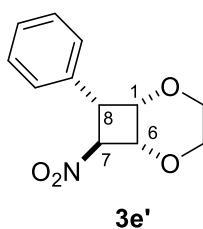

**MS** (EI):  $m/z$  (%) = 189 (20) [ $\text{M}-\text{NO}_2$ ] $^+$ , 117 (40) [ $\text{C}_9\text{H}_9$ ] $^+$ , 86 (100) [ $\text{C}_4\text{H}_6\text{O}_2$ ] $^+$ .

**$^1\text{H}$  NMR** (400 MHz,  $\text{C}_6\text{D}_6$ ):  $\delta$  [ppm] = 7.13–7.04 (m, 5H,  $\text{H}_{\text{ar}}$ ), 5.53 (dd,  $^3J = 9.4$  Hz, 7.1 Hz, 1H, H-7), 4.11 (dd,  $^3J = 7.1$  Hz, 4.8 Hz, 1H, H-6), 3.71 (*virt.* t,  $^3J \cong ^3J = 5.0$  Hz, 1H, H-1), 3.25–3.20 (m, 2H, H-8,  $\text{CHH-4}$ ), 2.97–2.93 (m, 1H,  $\text{CHH-4}$ ), 2.92–2.88 (m, 1H,  $\text{CHH-3}$ ), 2.83 (dd,  $^2J = 12.0$  Hz,  $^4J = 2.8$  Hz, 1H,  $\text{CHH-3}$ ).

**$^{13}\text{C}$  NMR** (101 MHz,  $\text{C}_6\text{D}_6$ ):  $\delta$  [ppm] = 134.2 (s,  $\text{C}_{\text{ar}}$ ), 128.6 (d, 2C, *ortho*- $\text{C}_{\text{arH}}$ )\*, 128.0 (d, 2C, *meta*- $\text{C}_{\text{arH}}$ )\*, 127.5 (d, *para*- $\text{C}_{\text{arH}}$ ), 82.5 (d, C-7), 69.9 (d, C-6), 69.3 (d, C-1), 63.3 (t, C-3), 61.4 (t, C-4), 43.3 (d, C-8).

\* The assignments are interconvertible.

significant NOE contacts:

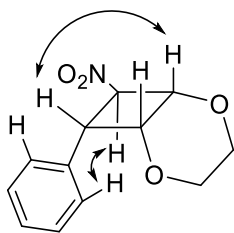

**3e''**:

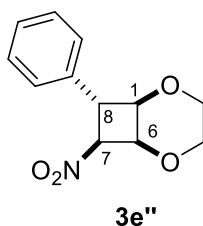

**MS** (EI):  $m/z$  (%) = 189 (40)  $[M-NO_2]^+$ , 145 (12)  $[C_{10}H_9O]^+$ , 117 (88)  $[C_9H_9]^+$ , 86 (100)  $[C_4H_6O_2]^+$ .

**$^1H$  NMR** (400 MHz,  $C_6D_6$ ):  $\delta$  [ppm] = 7.12–6.98 (m, 5H,  $H_{ar}$ ), 4.95 (*virt.* t,  $^3J \cong ^3J = 9.0$  Hz, 1H, H-8), 4.09–4.05 (m, 1H, H-6), 3.73 (dd,  $^3J = 9.0$  Hz, 5.0 Hz, 1H, H-7), 3.46 (dd,  $^3J = 9.0$  Hz, 4.2 Hz, 1H, H-1), 3.44–3.36 (m, 1H,  $CHH$ -3), 3.05–2.97 (m, 2H,  $CH_2$ -4), 2.93 (dt,  $^2J = 11.8$  Hz,  $^4J = 1.6$  Hz, 1H,  $CHH$ -3).

**$^{13}C$  NMR** (101 MHz,  $C_6D_6$ ):  $\delta$  [ppm] = 138.8 (s,  $C_{ar}$ ), 128.9 (d, 2C, *ortho*- $C_{ar}H$ )\*, 127.4 (d, *para*- $C_{ar}H$ ), 126.7 (d, 2C, *meta*- $C_{ar}H$ )\*, 77.0 (d, C-7), 71.4 (d, C-6), 66.9 (d, C-1), 63.6 (t, C-4), 60.2 (t, C-3), 45.2 (d, C-8).

\* The assignments are interchangeable.

significant NOE contacts:

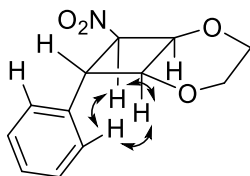

**(1-Cyclopropyl-3-nitrocyclobutane-1,2-diyl)dibenzene (3f)**

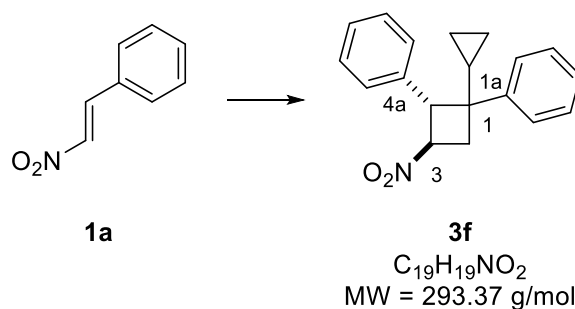

**Conditions A:** Following **GP 5**, a solution of nitroethene **1a** (14.9 mg, 100  $\mu$ mol, 1.00 equiv) and (1-cyclopropylvinyl) benzene (144 mg, 1.00 mmol, 10.0 equiv) in dichloromethane (5 mL) was irradiated at  $\lambda = 419$  nm (fluorescent lamps) for 16 hours at room temperature. The crude product was purified by column chromatography (2  $\times$  15 cm, P/Et<sub>2</sub>O = 20/1) to yield **3f** (25.6 mg, 86.6  $\mu$ mol, 88%, d.r. = 67:33) as a pale-yellow coloured oil.

**Conditions B:** Following **GP 5**, a solution of nitroethene **1a** (14.9 mg, 100  $\mu$ mol, 1.00 equiv) and (1-cyclopropylvinyl) benzene (144 mg, 1.00 mmol, 10.0 equiv) in dichloromethane (5 mL) was irradiated at  $\lambda = 424$  nm (LED) for 16 hours at room temperature. The crude product was purified by column chromatography (2  $\times$  15 cm, P/Et<sub>2</sub>O = 20/1) to yield **3f** (22.4 mg, 76.4  $\mu$ mol, 76%, d.r. = 56:44) as a pale-yellow coloured oil.

**Conditions C:** Following **GP 5**, a solution of nitroethene **1a** (14.9 mg, 100  $\mu$ mol, 1.00 equiv) and (1-cyclopropylvinyl) benzene (144 mg, 1.00 mmol, 10.0 equiv) in dichloromethane (5 mL) was irradiated at  $\lambda = 424$  nm (LED) for 16 hours at  $-78$  °C (at that point, no further conversion was observed). The crude product was purified by column chromatography (2  $\times$  15 cm, P/Et<sub>2</sub>O = 20/1) to yield **3f** (11.1 mg, 37.8  $\mu$ mol, 37%, d.r. = 88:12) as a pale-yellow coloured oil. Starting material was recovered as *trans*-isomer *trans*-**1a** (2.41 mg, 16.2  $\mu$ mol, 16%).

**IR** (ATR):  $\tilde{\nu}$  [cm<sup>-1</sup>] = 3028 (w, C<sub>ar</sub>-H), 1542 (s, C-NO<sub>2</sub>), 1496 (m), 1368 (m, C-NO<sub>2</sub>), 1028 (m), 824 (w, C<sub>ar</sub>-H), 770 (m, C<sub>ar</sub>-H).

**MS** (EI):  $m/z$  (%) = 247 (4) [M-NO<sub>2</sub>]<sup>+</sup>, 205 (32) [M-NO<sub>2</sub>-C<sub>3</sub>H<sub>6</sub>]<sup>+</sup>, 117 (100) [C<sub>9</sub>H<sub>9</sub>]<sup>+</sup>.

**HRMS** (ESI): calcd for C<sub>19</sub>H<sub>20</sub>NO<sub>2</sub><sup>+</sup> [M+H]<sup>+</sup>: 294.1488; found: 294.1488.



**3f:**

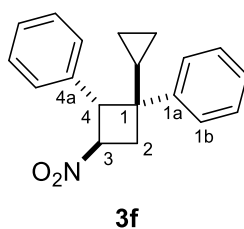

**TLC:**  $R_f = 0.69$  (P/Et<sub>2</sub>O = 9/1) [UV, KMnO<sub>4</sub>].

**<sup>1</sup>H NMR** (500 MHz, CDCl<sub>3</sub>):  $\delta$  [ppm] = 7.17–7.13 (m, 6H, H<sub>ar</sub>)\*, 7.00–6.98 (m, 2H, H<sub>ar</sub>)\*, 6.83–6.77 (m, 2H, H<sub>ar</sub>)\*, 5.13 (*virt.* q,  $^3J \cong ^3J = 9.0$  Hz, 1H, H-3'), 4.07 (d,  $^3J = 9.5$  Hz, 1H, H-4'), 3.01 (dd,  $^2J = 12.3$  Hz,  $^3J = 8.1$  Hz, 1H, CHH-2'), 2.60 (dd,  $^2J = 12.4$  Hz,  $^3J = 9.2$  Hz, 1H, CHH-2'), 1.43 [tt,  $^3J = 8.3$  Hz, 5.6 Hz, 1H, CH(CH<sub>2</sub>)<sub>2</sub>], 0.77–0.66 [m, 2H, CH(CH<sub>2</sub>)<sub>2</sub>], 0.57 [*virt.* tt,  $^2J \cong ^3J = 8.6$  Hz,  $^3J = 5.5$  Hz, 1H, CH(CH<sub>2</sub>)<sub>2</sub>], 0.44 [*virt.* dq,  $^2J = 9.0$  Hz,  $^3J \cong ^3J = 5.5$  Hz, 1H, CH(CH<sub>2</sub>)<sub>2</sub>].

**<sup>13</sup>C NMR** (101 MHz, CDCl<sub>3</sub>):  $\delta$  [ppm] = 141.1 (s, C-1a), 136.2 (s, C-4a), 128.4 (d, 2C, C<sub>ar</sub>H)\*, 128.3 (d, 2C, C<sub>ar</sub>H)\*, 128.0 (d, 2C, C<sub>ar</sub>H)\*, 127.8 (d, C<sub>ar</sub>H)\*, 127.5 (d, C<sub>ar</sub>H)\*, 126.8 (d, 2C, C<sub>ar</sub>H)\*, 76.9 (d, C-3'), 55.1 (d, C-4'), 47.3 (s, C-1'), 32.1 (t, C-2'), 22.58 [d, CH(CH<sub>2</sub>)<sub>2</sub>], 3.21 [t, CH(CH<sub>2</sub>)<sub>2</sub>], 2.11 [t, CH(CH<sub>2</sub>)<sub>2</sub>].

\* The exact assignment of these signals was not possible.

significant NOE contacts:

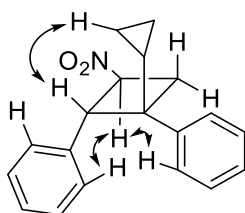

**3f':**

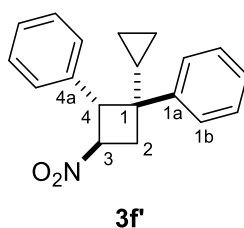

**TLC:**  $R_f = 0.58$  (P/Et<sub>2</sub>O = 9/1) [UV, KMnO<sub>4</sub>].

**<sup>1</sup>H NMR** (500 MHz, CDCl<sub>3</sub>):  $\delta$  [ppm] = 7.51–7.45 (m, 2H, H<sub>ar</sub>)\*, 7.43–7.40 (m, 2H, H<sub>ar</sub>)\*, 7.38–7.34 (m, 3H, H<sub>ar</sub>)\*, 7.28–7.24 (m, 3H, H<sub>ar</sub>)\*, 5.38 (*virt.* q,  $^3J \cong ^3J = 8.9$  Hz, 1H, H-3'), 4.43 (d,  $^3J = 9.3$  Hz, 1H, H-4'), 2.91 (dd,  $^2J = 12.1$  Hz,  $^3J = 8.9$  Hz, 1H, CHH-2'), 2.41 (dd,  $^2J = 12.1$  Hz,  $^3J = 8.1$  Hz, 1H, CHH-2'), 0.87 [tt,  $^3J = 8.3$  Hz, 5.7 Hz, 1H, CH(CH<sub>2</sub>)<sub>2</sub>], 0.67–0.61 [m, 1H, CH(CH<sub>2</sub>)<sub>2</sub>], 0.48 [*virt.* dq,  $^2J = 10.3$  Hz,  $^3J \cong ^3J = 5.3$  Hz, 1H, CH(CH<sub>2</sub>)<sub>2</sub>], 0.42 [*virt.* tt,  $^2J \cong ^3J = 8.9$  Hz,  $^3J = 5.1$  Hz, 1H, CH(CH<sub>2</sub>)<sub>2</sub>], 0.09 [*virt.* dq,  $^2J = 9.3$  Hz,  $^3J \cong ^3J = 5.7$  Hz, 1H, CH(CH<sub>2</sub>)<sub>2</sub>].

**<sup>13</sup>C NMR** (126 MHz, CDCl<sub>3</sub>):  $\delta$  [ppm] = 148.3 (s, C<sub>ar</sub>-1a), 136.2 (s, C<sub>ar</sub>-4a), 128.7 (d, 2C, C<sub>ar</sub>H)\*, 128.7 (d, 2C, C<sub>ar</sub>H)\*, 128.5 (d, 2C, C<sub>ar</sub>H)\*, 127.8 (d, C<sub>ar</sub>H)\*, 126.6 (d, C<sub>ar</sub>H)\*, 125.6 (d, 2C, C<sub>ar</sub>H)\*, 77.8 (d, C-3'), 57.6 (d, C-4'), 45.4 (s, C-1'), 31.9 (t, C-2'), 16.5 [d, CH(CH<sub>2</sub>)<sub>2</sub>], 4.36 [t, CH(CH<sub>2</sub>)<sub>2</sub>], 1.82 [t, CH(CH<sub>2</sub>)<sub>2</sub>].

\* The exact assignment of these signals is not possible.

significant NOE contacts:

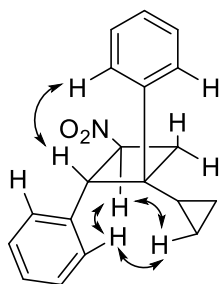

### [1-(*tert*-Butyl)-3-nitro-2-phenylcyclobutoxy]trimethylsilane (**3g**)

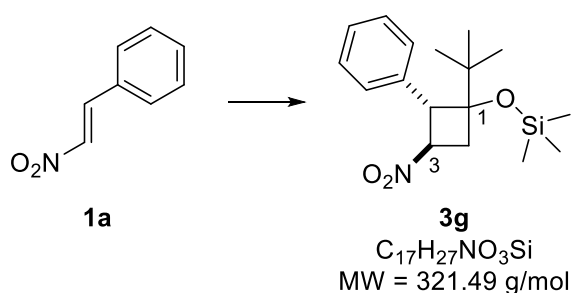

**Conditions A:** Following **GP 5**, a solution of nitroethene **1a** (29.8 mg, 200  $\mu$ mol, 1.00 equiv) and [(3,3-dimethylbut-1-en-2-yl)oxy]trimethylsilane (431  $\mu$ L, 344 mg, 1.00 mmol, 10.0 equiv) in dichloromethane (10 mL) was irradiated at  $\lambda = 419$  nm (fluorescent lamps) for 24 hours at

room temperature. The crude product was purified by column chromatography ( $2 \times 15$  cm, P/Et<sub>2</sub>O = 50/1) to yield **3g** (22.2 mg, 69.0  $\mu$ mol, 34%, d.r. = 77:23) as a yellow coloured oil.

**Conditions B:** Following **GP 5**, a solution of nitroethene **1a** (14.9 mg, 100  $\mu$ mol, 1.00 equiv) and [(3,3-dimethylbut-1-en-2-yl)oxy]trimethylsilane (216  $\mu$ L, 172 mg, 1.00 mmol, 10.0 equiv) in dichloromethane (5 mL) was irradiated at  $\lambda = 424$  nm (LED) for 24 hours at room temperature. The crude product was purified by column chromatography ( $2 \times 15$  cm, P/Et<sub>2</sub>O = 50/1) to yield **3g** (12.3 mg, 38.3  $\mu$ mol, 38%, d.r. = 77:23) as a yellow coloured oil.

**Conditions C:** Following **GP 5**, a solution of nitroethene **1a** (14.9 mg, 100  $\mu$ mol, 1.00 equiv) and [(3,3-dimethylbut-1-en-2-yl)oxy]trimethylsilane (216  $\mu$ L, 172 mg, 1.00 mmol, 10.0 equiv) in dichloromethane (5 mL) was irradiated at  $\lambda = 424$  nm (LED) for 16 hours at  $-78$  °C. The crude product was purified by column chromatography ( $2 \times 15$  cm, P/Et<sub>2</sub>O = 50/1) to yield **3g** (11.8 mg, 36.7  $\mu$ mol, 37%, d.r. = 77:23) as a yellow coloured oil. Starting material was recovered as *cis*-isomer *cis*-**1a** (7.20 mg, 48.3  $\mu$ mol, 48%).

**TLC:**  $R_f = 0.70$  (P/Et<sub>2</sub>O = 19/1) [UV, KMnO<sub>4</sub>].

**IR** (ATR):  $\tilde{\nu}$  [cm<sup>-1</sup>] = 3063 (w, C<sub>ar</sub>-H), 3031 (w, C<sub>ar</sub>-H), 2958 (w, C-H), 1546 (s, C-NO<sub>2</sub>), 1480 (m, C<sub>sp3</sub>-H), 1395 (w), 1368 (m, C-NO<sub>2</sub>), 1252 [s, O-Si-C(CH<sub>3</sub>)], 1146 (s), 1029 (m), 870 (m, C<sub>ar</sub>-H), 833 [vs, O-Si-C(CH<sub>3</sub>)].

**MS** (EI):  $m/z$  (%) = 275 (17) [M-NO<sub>2</sub>]<sup>+</sup>, 219 (18) [M-NO<sub>2</sub>-C(CH<sub>3</sub>)<sub>3</sub>]<sup>+</sup>, 117 (100) [C<sub>9</sub>H<sub>9</sub>]<sup>+</sup>, 73 (36) [Si(CH<sub>3</sub>)<sub>3</sub>]<sup>+</sup>.

**HRMS** (ESI): calcd for C<sub>17</sub>H<sub>28</sub>NO<sub>3</sub>Si<sup>+</sup> [M+H]<sup>+</sup>: 322.1833; found: 322.1833.

**3g:**

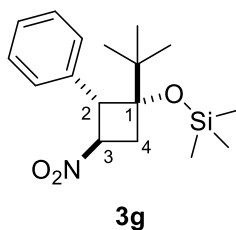

**<sup>1</sup>H NMR** (500 MHz, CDCl<sub>3</sub>): δ [ppm] = 7.33–7.31 (m, 5H, H<sub>ar</sub>), 5.13 (*virt.* q, <sup>3</sup>J ≅ <sup>3</sup>J = 8.5 Hz, 1H, H-3), 4.24 (d, <sup>3</sup>J = 8.6 Hz, 1H, H-2), 2.93 (dd, <sup>2</sup>J = 13.2 Hz, <sup>3</sup>J = 8.2 Hz, 1H, CHH-4), 2.50 (dd, <sup>2</sup>J = 13.2 Hz, <sup>3</sup>J = 8.6 Hz, 1H, CHH-4), 0.97 [s, 9H, C(CH<sub>3</sub>)<sub>3</sub>], 0.12 [s, 9H, OSi(CH<sub>3</sub>)<sub>3</sub>].

**<sup>13</sup>C NMR** (126 MHz, CDCl<sub>3</sub>): δ [ppm] = 136.4 (s, C<sub>ar</sub>), 129.0 (d, 2C, *ortho*-C<sub>ar</sub>H), 128.1 (d, 2C, *meta*-C<sub>ar</sub>H), 127.3 (d, *para*-C<sub>ar</sub>H), 83.3 (s, C-1), 78.2 (d, C-3), 52.2 (d, C-2), 37.9 [s, C(CH<sub>3</sub>)<sub>3</sub>], 34.3 (t, C-4), 25.8 [q, 3C, C(CH<sub>3</sub>)<sub>3</sub>], 2.6 [q, 3C, OSi(CH<sub>3</sub>)<sub>3</sub>].

significant NOE contacts:

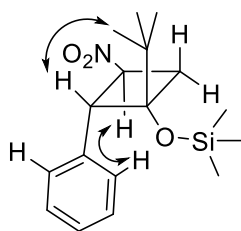

**3g'**:

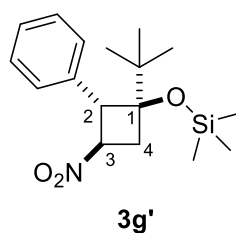

**<sup>1</sup>H NMR** (500 MHz, CDCl<sub>3</sub>): δ [ppm] = 7.35–7.29 (m, 5H, H<sub>ar</sub>), 5.23 (*virt.* q, <sup>3</sup>J ≅ <sup>3</sup>J = 8.6 Hz, 1H, H-3), 4.24 (d, <sup>3</sup>J = 8.6 Hz, 1H, H-2), 2.93 (ddd, <sup>2</sup>J = 13.3 Hz, <sup>3</sup>J = 8.3 Hz, <sup>4</sup>J = 0.9 Hz, 1H, CHH-4), 2.50 (dd, <sup>2</sup>J = 13.3 Hz, <sup>3</sup>J = 8.6 Hz, 1H, CHH-4), 0.97 [s, 9H, C(CH<sub>3</sub>)<sub>3</sub>], 0.12 [s, 9H, OSi(CH<sub>3</sub>)<sub>3</sub>].

**<sup>13</sup>C NMR** (126 MHz, CDCl<sub>3</sub>): δ [ppm] = 135.9 (s, C<sub>ar</sub>), 128.4 (d, 2C, *meta*-C<sub>ar</sub>H), 127.8 (d, 2C, *ortho*-C<sub>ar</sub>H), 127.3 (d, *para*-C<sub>ar</sub>H), 80.1 (s, C-1), 73.3 (d, C-3), 61.2 (d, C-2), 38.4 [s, C(CH<sub>3</sub>)<sub>3</sub>], 36.8 (t, C-4), 25.2 [q, 3C, C(CH<sub>3</sub>)<sub>3</sub>], 2.18 [q, 3C, OSi(CH<sub>3</sub>)<sub>3</sub>].

significant NOE contacts:

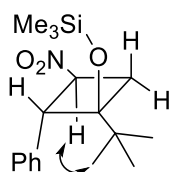

### Trimethyl[(6-nitro-7-phenylbicyclo[3.2.0]heptan-1-yl)oxy]silane (**3h**)

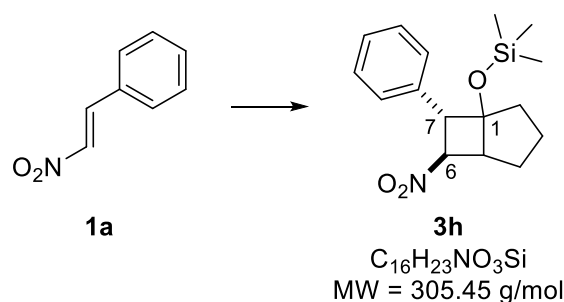

**Conditions A:** Following **GP 5**, a solution of nitroethene **1a** (29.8 mg, 200  $\mu$ mol, 1.00 equiv) and (cyclopent-1-en-1-yloxy) trimethylsilane (312 mg, 2.00 mmol, 10.0 equiv) in dichloromethane (10 mL) was irradiated at  $\lambda = 419$  nm (fluorescent lamps) for 18 hours at room temperature. The crude product was purified by column chromatography ( $2 \times 15$  cm, P/Et<sub>2</sub>O = 40/1) to yield **3h** (20.7 mg, 67.8  $\mu$ mol, 35%, d.r. = 59:41) as a colorless oil.

**Conditions B:** Following **GP 5**, a solution of nitroethene **1a** (14.9 mg, 100  $\mu$ mol, 1.00 equiv) and (cyclopent-1-en-1-yloxy) trimethylsilane (156 mg, 1.00 mmol, 10.0 equiv) in dichloromethane (5 mL) was irradiated at  $\lambda = 424$  nm (LED) for 24 hours at room temperature. The crude product was purified by column chromatography ( $2 \times 15$  cm, P/Et<sub>2</sub>O = 40/1) to yield **3h** (9.8 mg, 32.1  $\mu$ mol, 32%, d.r. = 59:41) as a colorless oil.

**Conditions C:** Following general procedure **5**, a solution of nitroethene **1a** (14.9 mg, 100  $\mu$ mol, 1.00 equiv) and (cyclopent-1-en-1-yloxy) trimethylsilane (156 mg, 1.00 mmol, 10.0 equiv) in dichloromethane (5 mL) was irradiated at  $\lambda = 424$  nm (LED) for 24 hours at  $-78$  °C. The crude product was purified by column chromatography ( $2 \times 15$  cm, P/Et<sub>2</sub>O = 40/1) to yield **3h** (11.7 mg, 38.3  $\mu$ mol, 38%, d.r. = 61:39) as a colorless oil.

**TLC:**  $R_f = 0.70$  (P/Et<sub>2</sub>O = 9/1) [UV, KMnO<sub>4</sub>].

**IR** (ATR):  $\tilde{\nu}$  [cm<sup>-1</sup>] = 3004 (w, C<sub>ar</sub>-H), 2926 (w, C-H), 1542 (s, C-NO<sub>2</sub>), 1497 (m), 1364 (m, C-NO<sub>2</sub>), 1264 [w, O-Si-C(CH<sub>3</sub>)], 1045 (m), 1018 (m), 891 (m, C<sub>ar</sub>-H), 822 [m, O-Si-C(CH<sub>3</sub>)], 758 (s, C<sub>ar</sub>-H).

**MS** (EI):  $m/z$  (%) = 259 (88) [M-NO<sub>2</sub>]<sup>+</sup>, 169 (60) [M-NO<sub>2</sub>-OSi(CH<sub>3</sub>)<sub>3</sub>]<sup>+</sup>, 91 (28) [C<sub>9</sub>H<sub>9</sub>]<sup>+</sup>, 73 (100) [Si(CH<sub>3</sub>)<sub>3</sub>]<sup>+</sup>.

**HRMS** (ESI): calcd for C<sub>16</sub>H<sub>24</sub>NO<sub>3</sub>Si<sup>+</sup> [M+H]<sup>+</sup>: 306.1522; found: 306.1522.

**3h:**

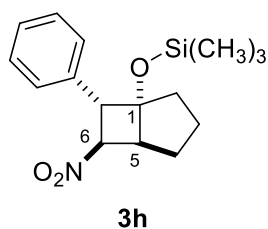

**<sup>1</sup>H NMR** (500 MHz, CDCl<sub>3</sub>): δ [ppm] = 7.38–7.32 (m, 2H, *meta*-H<sub>ar</sub>), 7.29–7.25 (m, 3H, *ortho*-H<sub>ar</sub>, *para*-H<sub>ar</sub>), 5.35 (dd, <sup>3</sup>*J* = 10.1 Hz, 8.8 Hz, 1H, H-6), 4.06 (d, <sup>3</sup>*J* = 8.8 Hz, 1H, H-7), 3.09 (*virt.* t, <sup>3</sup>*J* ≅ <sup>3</sup>*J* = 9.2 Hz, 1H, H-5), 2.00–1.91 (m, 4H, CH<sub>2</sub>-3, CHH-2, CHH-4), 1.89–1.77 (m, 1H, CHH-2), 1.62–1.44 (m, 1H, CHH-4), –0.14 [s, 9H, OSi(CH<sub>3</sub>)<sub>3</sub>].

**<sup>13</sup>C NMR** (126 MHz, CDCl<sub>3</sub>): δ [ppm] = 136.5 (s, C<sub>ar</sub>), 129.5 (d, 2C, *ortho*-C<sub>ar</sub>H), 128.8/128.5 (d, 2C *meta*-C<sub>ar</sub>H)\*, 127.5/127.3 (d, *para*-C<sub>ar</sub>H)\*, 83.5 (s, C-1), 81.0 (d, C-6), 51.9 (d, C-7), 49.9 (d, C-5), 40.1 (t, CH<sub>2</sub>-2), 26.1 (t, CH<sub>2</sub>-4), 25.9 (t, CH<sub>2</sub>-3), 1.64 [q, 3C, OSi(CH<sub>3</sub>)<sub>3</sub>].

\* The exact assignment of these <sup>13</sup>C-signals was not possible.

significant NOE contacts:

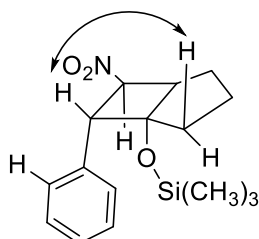

**3h':**

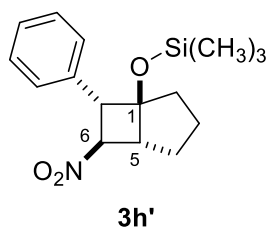

**<sup>1</sup>H NMR** (500 MHz, CDCl<sub>3</sub>): δ [ppm] = 7.38–7.32 (m, 2H, *meta*-H<sub>ar</sub>), 7.29–7.25 (m, 1H, *para*-H<sub>ar</sub>), 7.24–7.21 (m, 2H, *ortho*-H<sub>ar</sub>), 4.59 (dd, <sup>3</sup>*J* = 8.3 Hz, 5.4 Hz, 1H, H-6), 4.40 (d, <sup>3</sup>*J* = 8.3 Hz, 1H, H-7), 3.30 (*virt.* t, <sup>3</sup>*J* ≅ <sup>3</sup>*J* = 6.2 Hz, 1H, H-5), 2.00–1.91 (m, 1H, CHH-4), 1.89–1.77 (m,

2H, CHH-4, CHH-2), 1.71–1.66 (m, 1H, CHH-3), 1.62–1.44 (m, 2H, CHH-2, CHH-3), 0.22 [s, 9H, OSi(CH<sub>3</sub>)<sub>3</sub>].

<sup>13</sup>C NMR (126 MHz, CDCl<sub>3</sub>): δ [ppm] = 136.3 (s, C<sub>ar</sub>), 128.8/128.5 (d, *meta*-C<sub>ar</sub>H)\*, 127.5/127.3 (d, *para*-C<sub>ar</sub>H)\*, 126.7 (d, *ortho*-C<sub>ar</sub>H), 84.3 (s, C-1), 79.2 (d, C-6), 56.3 (d, C-7), 52.7 (d, C-5), 35.8 (d, CH<sub>2</sub>-3), 30.0 (d, CH<sub>2</sub>-4), 24.9 (d, CH<sub>2</sub>-2), 2.03 [q, 3C, OSi(CH<sub>3</sub>)<sub>3</sub>].

\* The exact assignment of these <sup>13</sup>C-signals was not possible.

significant NOE contacts:

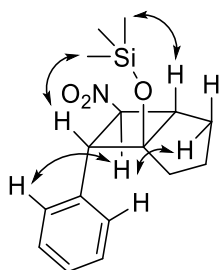

### (2',2'-Dicyclopnyl-4'-nitrocyclobutyl)benzene (**3i**)

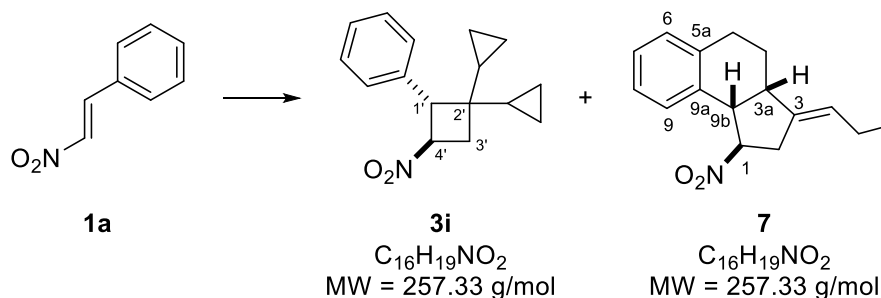

Following **GP 5**, a solution of nitroethene **1a** (14.9 mg, 100 μmol, 1.00 equiv) and ethene-1,1-diyldicyclopropane (109 mg, 1.00 mmol, 10.0 equiv) in dichloromethane (5 mL) was irradiated at λ = 419 nm (fluorescent lamps) for twelve hours at room temperature. The crude product was purified by column chromatography (2 × 15 cm, P/Et<sub>2</sub>O = 40/1) to yield **3i** (18.0 mg, 69.9 μmol, 70%) and the side product **7** (2.20 mg, 8.55 μmol, 9%) both as a yellow coloured liquid.

**3i:**

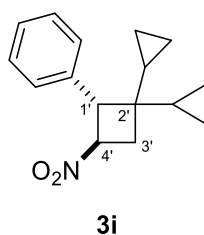

**TLC:**  $R_f = 0.58$  (P/Et<sub>2</sub>O = 19/1) [UV, KMnO<sub>4</sub>].

**IR** (ATR):  $\tilde{\nu}$  [cm<sup>-1</sup>] = 3079 (w, C<sub>cyclopropane</sub>-H), 3004 (w, C<sub>ar</sub>-H), 1542 (s, C-NO<sub>2</sub>), 1449 (w), 1369 (m, C-NO<sub>2</sub>), 1017 (s), 822 (w, C<sub>ar</sub>-H), 758 (s, C<sub>ar</sub>-H).

**MS** (EI):  $m/z$  (%) = 211 (4) [M-NO<sub>2</sub>]<sup>+</sup>, 169 (16) [M-NO<sub>2</sub>-C<sub>3</sub>H<sub>6</sub>]<sup>+</sup>, 117 (100) [C<sub>9</sub>H<sub>9</sub>]<sup>+</sup>.

**HRMS** (ESI): calcd for C<sub>16</sub>H<sub>20</sub>NO<sub>2</sub><sup>+</sup> [M+H]<sup>+</sup>: 258.1448; found: 258.1449.

**<sup>1</sup>H NMR** (400 MHz, CDCl<sub>3</sub>):  $\delta$  [ppm] = 7.44–7.20 (m, 5H, H<sub>ar</sub>), 5.20 (*virt. q*, <sup>3</sup> $J \cong$  <sup>3</sup> $J = 8.7$  Hz, 1H, H-4'), 3.97 (d, <sup>3</sup> $J = 9.2$  Hz, 1H, H-1'), 2.06 (dd, <sup>2</sup> $J = 12.2$  Hz, <sup>3</sup> $J = 8.7$  Hz, 1H, CHH-3'), 1.71 (dd, <sup>3</sup> $J = 12.2$  Hz, <sup>3</sup> $J = 8.3$  Hz, 1H, CHH-3'), 1.09 [tt, <sup>3</sup> $J = 8.4$  Hz, 5.5 Hz, 1H, CH(CH<sub>2</sub>)<sub>2</sub>], 0.60–0.25 [m, 6H, CH(CH<sub>2</sub>)<sub>2</sub>, CH(CH<sub>2</sub>)<sub>2</sub>], 0.20–0.13 [m, 1H, CH(CH<sub>2</sub>)<sub>2</sub>].

**<sup>13</sup>C NMR** (101 MHz, CDCl<sub>3</sub>):  $\delta$  [ppm] = 136.4 (s, C<sub>ar</sub>), 128.5 (d, 2C, *meta*-C<sub>ar</sub>H), 127.7 (d, 2C, *ortho*-C<sub>ar</sub>H), 127.2 (d, *para*-C<sub>ar</sub>H), 76.6 (d, C-4'), 55.5 (d, C-1'), 41.7 (s, C-2'), 27.8 (t, C-3'), 20.2 [d, CH(CH<sub>2</sub>)<sub>2</sub>], 14.6 [d, CH(CH<sub>2</sub>)<sub>2</sub>], 1.93 [t, CH(CH<sub>2</sub>)<sub>2</sub>], 1.74 [t, CH(CH<sub>2</sub>)<sub>2</sub>], 0.90 [t, CH(CH<sub>2</sub>)<sub>2</sub>], 0.72 [t, CH(CH<sub>2</sub>)<sub>2</sub>].

### 1-Nitro-3-propylidene-2,3,3a,4,5,9b-hexahydro-1H-cyclopenta[a]naphthalene (7)

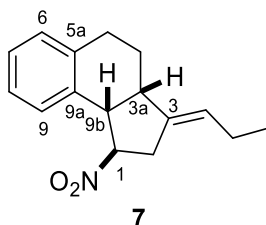

**TLC:**  $R_f = 0.69$  (P/Et<sub>2</sub>O = 19/1) [UV, KMnO<sub>4</sub>].



**IR** (ATR):  $\tilde{\nu}$  [ $\text{cm}^{-1}$ ]: 3419 (br), 2928 (w,  $\text{C}_{\text{ar}}\text{-H}$ ), 1722 (w), 1547 (s,  $\text{C-NO}_2$ ), 1367 (m,  $\text{C-NO}_2$ ), 1023 (m), 856 (m,  $\text{C}_{\text{ar}}\text{-H}$ ), 791 (m,  $\text{R}_2\text{C=CHR}$ ).

**MS** (EI):  $m/z$  (%) = 181 (100) [ $\text{M-NO}_2\text{-C}_2\text{H}_4$ ] $^+$ , 167 (40) [ $\text{C}_{13}\text{H}_{11}$ ] $^+$ , 128 (16) [ $\text{C}_{10}\text{H}_8$ ] $^+$ .

**HRMS** (ESI): calcd for  $\text{C}_{16}\text{H}_{20}\text{NO}_2^+$  [ $\text{M+H}$ ] $^+$ : 258.1448; found: 258.1449.

**$^1\text{H}$  NMR** (500 MHz,  $\text{CDCl}_3$ ):  $\delta$  [ppm] = 7.17–7.05 (m, 4H,  $\text{H}_{\text{ar}}$ ), 5.45 (ttd,  $^3J = 7.1$  Hz,  $^4J = 2.5$  Hz, 1.6 Hz, 1H,  $\text{C=CHCH}_2\text{CH}_3$ ), 4.90 (virt. q,  $^3J \cong ^3J = 7.3$  Hz, 1H, H-1), 3.90 (virt. t,  $^3J \cong ^3J = 7.5$  Hz, 1H, H-9b), 3.07–2.94 (m, 2H, H-3a,  $\text{CHH-2}$ ), 2.90 (dddd,  $^2J = 17.3$  Hz,  $^3J = 7.9$  Hz,  $^4J = 2.7$  Hz, 1.4 Hz, 1H,  $\text{CHH-2}$ ), 2.80–2.75 (m, 1H,  $\text{CHH-5}$ ), 2.73–2.68 (m, 1H,  $\text{CHH-5}$ ), 2.07–1.98 (m, 2H,  $\text{C=CHCH}_2\text{CH}_3$ ), 1.84 (ddt,  $^2J = 13.8$  Hz,  $^3J = 6.2$  Hz, 4.7 Hz, 1H,  $\text{CHH-4}$ ), 1.67 (dtd,  $^2J = 13.8$  Hz,  $^3J = 9.5$  Hz, 4.8 Hz, 1H,  $\text{CHH-4}$ ), 1.00 (t,  $^3J = 7.5$  Hz, 3H,  $\text{CH}_3$ ).

**$^{13}\text{C}$  NMR** (126 MHz,  $\text{CDCl}_3$ ):  $\delta$  [ppm] = 138.7 (s, C-3), 137.1 (s, C-5a), 134.4 (s, C-9a), 129.3 (d, C-6), 128.6 (d, C-9), 127.2 (d, C-8), 126.6 (d, C-7), 125.9 (d,  $\text{C=CHCH}_2\text{CH}_3$ ), 92.2 (d, C-1), 47.7 (d, C-9b), 42.0 (d, C-3a), 34.6 (t, C-2), 27.8 (t, C-5), 27.3 (t, C-4), 22.8 (t,  $\text{C=CHCH}_2\text{CH}_3$ ), 14.1 (q,  $\text{CH}_3$ ).

### (3'-Methyl-4'-nitrocyclobutane)-1,2-diyl-dibenzene (**3j**)

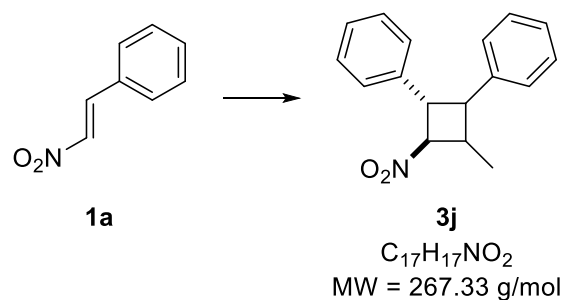

**Conditions A:** Following **GP 5**, a solution of nitroethene **1a** (29.8 mg, 200  $\mu\text{mol}$ , 1.00 equiv) and *trans*-**14** (259  $\mu\text{L}$ , 236 mg, 2.00 mmol, 10.0 equiv) in dichloromethane (10 mL) was irradiated at  $\lambda = 419$  nm (fluorescent lamps) for twelve hours at room temperature (at that point, no further conversion was observed). The crude product was purified by column chromatography (2  $\times$  15 cm,  $\text{P/Et}_2\text{O} = 50/1$ ) to yield **3j** (28.1 mg, 1.05 mmol, 53%, d.r. = 46:54) as a colorless oil. Starting material was recovered as *cis*-isomer *cis*-**1a** (6.60 mg, 42.3  $\mu\text{mol}$ , 22%).

**Conditions B:** Following **GP 5**, a solution of nitroethene **1a** (14.9 mg, 100  $\mu\text{mol}$ , 1.00 equiv) and *trans*-**14** (130  $\mu\text{L}$ , 118 mg, 1.00 mmol, 10.0 equiv) in dichloromethane (5 mL) was

irradiated at  $\lambda = 424$  nm (LED) for twelve hours at room temperature (at that point, no further conversion was observed). The crude product was purified by column chromatography ( $2 \times 10$  cm, P/Et<sub>2</sub>O = 50/1) to yield **3j** (14.6 mg, 54.6  $\mu$ mol, 53%, d.r. = 49:51) as a colorless oil. Starting material was recovered as *cis*-isomer *cis*-**1a** (3.03 mg, 20.3  $\mu$ mol, 20%).

**Conditions C:** Following **GP 5**, a solution of nitroethene **1a** (14.9 mg, 100  $\mu$ mol, 1.00 equiv) and *trans*-**14** (130  $\mu$ L, 118 mg, 1.00 mmol, 10.0 equiv) in dichloromethane (5 mL) was irradiated at  $\lambda = 424$  nm (LED) for twelve hours at  $-78$  °C (at that point, no further conversion was observed). The crude product was purified by column chromatography ( $2 \times 10$  cm, P/Et<sub>2</sub>O = 50/1) to yield **3j** (10.7 mg, 40.0  $\mu$ mol, 40%, d.r. = 64:36) as a colorless oil. Starting material was recovered as *cis*-isomer *cis*-**1a** (2.80 mg, 18.8  $\mu$ mol, 19%).

**Procedure for the [2+2] photocycloaddition reaction of *trans*- $\beta$ -nitrostyrene with *cis*- $\beta$ -methylstyrene:** Following **GP 5**, a solution of nitroethene **1a** (29.8 mg, 200  $\mu$ mol, 1.00 equiv) and *cis*-**14** (260  $\mu$ L, 236 mg, 2.00 mmol, 10.0 equiv) in dichloromethane (10 mL) was irradiated at  $\lambda = 419$  nm (fluorescent lamps) for 15 hours at room temperature (at this point, no further conversion was observed). The crude product was purified by column chromatography ( $2 \times 15$  cm, P/Et<sub>2</sub>O = 50/1) to yield **3j** (45.8 mg, 1.12 mmol, 56%, d.r. = 77:23) as a colorless oil. Starting material was recovered as *cis*-isomer *cis*-**1a** (6.80 mg, 45.6  $\mu$ mol, 23%) was recovered. The olefin was recovered exclusively as *cis*-**14**.

The analytical data match those reported in the literature.<sup>[2]</sup>

#### 2,2,3,3-Tetramethyl-4-phenylcyclobutan-1-amine (**4**)

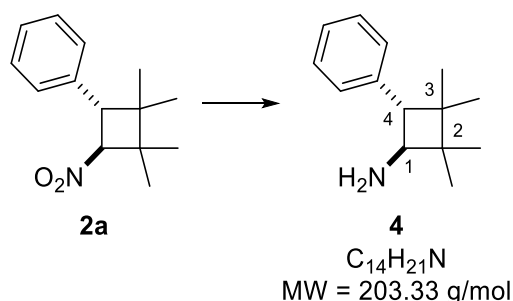

According to a literature known procedure:<sup>[19]</sup> Zn powder (350 mg, 5.36 mmol, 25.0 equiv) was added in small portions to a stirred solution of nitrocyclobutane **2a** (50.0 mg, 214  $\mu$ mol, 1.00 equiv) in a mixture of water/acetic acid (2 mL; 1/1 v/v). The suspension was stirred for

four hours at room temperature. Aqueous NaOH solution ( $c = 5 \text{ M}$ ) was added until  $\text{pH} = 7$  was reached. The cloudy solution was extracted with dichloromethane ( $2 \times 50 \text{ mL}$ ). The combined organic layers were washed with saturated aqueous NaCl solution ( $100 \text{ mL}$ ), dried over  $\text{Na}_2\text{SO}_4$ , filtered and concentrated *in vacuo* to yield **4** ( $33.6 \text{ mg}$ ,  $165 \mu\text{mol}$ ,  $77\%$ ) as a colorless oil.

**IR** (ATR):  $\tilde{\nu} [\text{cm}^{-1}] = 3060 \text{ (w, C}_{\text{Ph-H}}\text{)}, 2959 \text{ (m, C}_{\text{Ph-H}}\text{)}, 2866 \text{ (w)}, 2604 \text{ (w)}, 1566 \text{ (br s, C-NH}_2\text{)}, 1458 \text{ (s)}, 1449 \text{ (s)}, 1358 \text{ (m)}, 1337 \text{ (s)}, 1270 \text{ (m)}, 1132 \text{ (m)}, 885 \text{ (m)}, 810 \text{ (m, C}_{\text{Ph-H}}\text{)}.$

**MS** (EI,  $70 \text{ eV}$ ):  $m/z (\%) = 132 \text{ (5) [M-C}_4\text{H}_9\text{N]}^+, 119 \text{ (100) [M-C}_4\text{H}_9\text{N-CH}_3\text{]}^+, 91 \text{ (13) [C}_7\text{H}_7\text{]}^+, 71 \text{ (31) [C}_4\text{H}_9\text{]}^+, 56 \text{ (11)}.$

**HRMS** (ESI): calcd for  $\text{C}_{14}\text{H}_{22}\text{N}^+ [\text{M}+\text{H}]^+$ :  $204.1741$ ; found:  $204.1748$ .

**$^1\text{H NMR}$**  ( $400 \text{ MHz}$ ,  $\text{CDCl}_3$ ):  $\delta [\text{ppm}] = 7.29\text{--}7.21 \text{ (m, 2H, meta-H}_{\text{ar}}\text{)}, 7.19\text{--}7.08 \text{ (m, 3H, ortho-H}_{\text{ar}}, \text{para-H}_{\text{ar}}\text{)}, 3.37 \text{ (d, } ^3J = 9.9 \text{ Hz, 1H, H-1)}, 2.86 \text{ (d, } ^3J = 9.9 \text{ Hz, 1H, H-4)}, 1.51 \text{ (br. s., 2H, NH}_2\text{)}, 1.03 \text{ [s, 3H, CH}_3\text{-2]}, 1.01 \text{ [s, 3H, CH}_3\text{-3]}, 0.93 \text{ [s, 3H, CH}_3\text{-2]}, 0.59 \text{ [s, 3H, CH}_3\text{-3]}.$

**$^{13}\text{C NMR}$**  ( $101 \text{ MHz}$ ,  $\text{CDCl}_3$ ):  $\delta [\text{ppm}] = 139.6 \text{ (s, C}_{\text{ar}}\text{)}, 128.3 \text{ (d, 2C, meta-C}_{\text{arH}}\text{)}, 127.7 \text{ (d, 2C, ortho-C}_{\text{arH}}\text{)}, 126.1 \text{ (d, para-C}_{\text{arH}}\text{)}, 56.8 \text{ (d, C-4)}, 55.5 \text{ (d, C-1)}, 41.7 \text{ (s, C-2)}, 39.6 \text{ (s, C-3)}, 24.2 \text{ [q, (C-3)CH}_3\text{]}, 22.6 \text{ [q, (C-2)CH}_3\text{]}, 21.1 \text{ [q, (C-3)CH}_3\text{]}, 18.7 \text{ [q, (C-2)CH}_3\text{]}.$

**Methyl (E)-1-nitro-3-propylidene-2,3,3a,4,5,9b-hexahydro-1H-cyclopenta[a]naphthalene-7-carboxylate (8)**

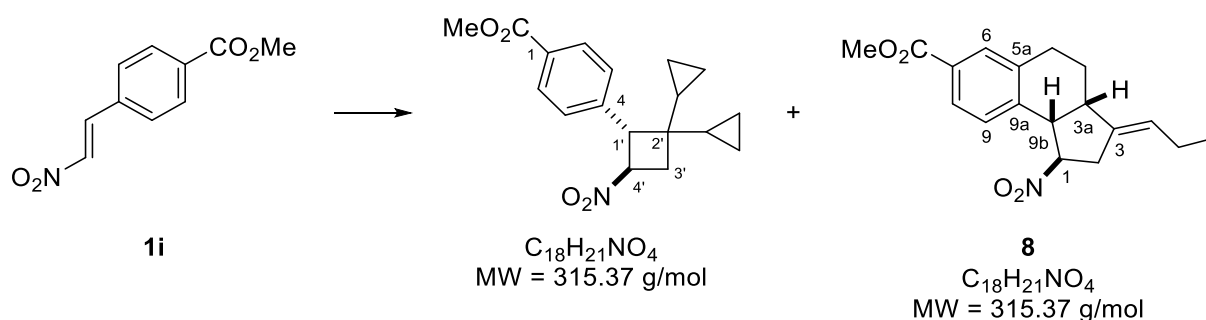

Following **GP 5**, a solution of nitroethene **1i** ( $248 \text{ mg}$ ,  $1.20 \text{ mmol}$ ,  $1.00 \text{ equiv}$ ) and 1,1-dicyclopropylethylene ( $1.29 \text{ g}$ ,  $12.0 \text{ mmol}$ ,  $10.0 \text{ equiv}$ ) in dichloromethane ( $60 \text{ mL}$ ) were irradiated at  $\lambda = 419 \text{ nm}$  (fluorescent lamps) for 16 hours at room temperature. The crude product was purified by column chromatography ( $4 \times 20 \text{ cm}$ ,  $\text{P/Et}_2\text{O} = 40/1$ ) to yield

(2',2'-dicyclopropyl-4'-nitrocyclobutyl)-benzene (213 mg, 6.75 mmol, 57%) and **8** (16.0 mg, 50.7  $\mu$ mol, 5%) both as a colorless solid.

**(2',2'-Dicyclopropyl-4'-nitrocyclobutyl)benzene**

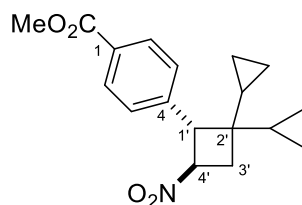

**TLC:**  $R_f = 0.48$  (P/Et<sub>2</sub>O = 19/1) [UV, KMnO<sub>4</sub>].

**IR** (ATR):  $\tilde{\nu}$  [cm<sup>-1</sup>] = 3079 (w, C<sub>cyclopropane</sub>-H), 3003 (w, C<sub>ar</sub>-H), 2845 (w, O-CH<sub>3</sub>), 1717 (vs, C=O), 1543 (s, C-NO<sub>2</sub>), 1369 (m, C-NO<sub>2</sub>), 1277 (vs, O=C-OCH<sub>3</sub>), 1107 (s, O=C-OCH<sub>3</sub>), 1018 (m), 803 (w, C<sub>ar</sub>-H).

**MS** (EI):  $m/z$  (%) = 269 (12) [M-NO<sub>2</sub>]<sup>+</sup>, 227 (16) [M-NO<sub>2</sub>-C<sub>3</sub>H<sub>6</sub>]<sup>+</sup>, 175 (100) [C<sub>11</sub>H<sub>11</sub>O<sub>2</sub>]<sup>+</sup>, 149 (55) [C<sub>9</sub>H<sub>9</sub>O<sub>2</sub>]<sup>+</sup>, 115 (66), 91 (46) [C<sub>7</sub>H<sub>7</sub>]<sup>+</sup>.

**HRMS** (ESI): calcd for C<sub>18</sub>H<sub>22</sub>NO<sub>4</sub><sup>+</sup> [M+H]<sup>+</sup>: 316.1543; found: 316.1544.

**<sup>1</sup>H NMR** (400 MHz, CDCl<sub>3</sub>):  $\delta$  [ppm] = 8.02 (d, <sup>3</sup>J = 8.3 Hz, 2H, H-2, H-6), 7.38 (d, <sup>3</sup>J = 8.3 Hz, 2H, H-3, H-5), 5.21 (*virt.* q, <sup>3</sup>J  $\cong$  <sup>3</sup>J = 8.7 Hz, 1H, H-4'), 4.02 (d, <sup>3</sup>J = 9.2 Hz, 1H, H-1'), 3.91 (s, 3H, CO<sub>2</sub>CH<sub>3</sub>), 2.08 (dd, <sup>2</sup>J = 12.3 Hz, <sup>3</sup>J = 8.6 Hz, 1H, CHH-3'), 1.73 (dd, <sup>2</sup>J = 12.3 Hz, <sup>3</sup>J = 8.3 Hz, 1H, CHH-3'), 1.15–1.02 [m, 1H, CH(CH<sub>2</sub>)<sub>2</sub>], 0.62–0.25 [m, 8H, CH(CH<sub>2</sub>)<sub>2</sub>, CH(CH<sub>2</sub>)<sub>2</sub>], 0.19–0.13 (m, 1H, CH(CH<sub>2</sub>)<sub>2</sub>).

**<sup>13</sup>C NMR** (101 MHz, CDCl<sub>3</sub>):  $\delta$  [ppm] = 166.9 (CO<sub>2</sub>CH<sub>3</sub>), 141.7 (s, C-4), 129.8 (d, 2C, C-2, C-6), 127.6 (d, 2C, C-3, C-5), 76.1 (d, C-4'), 55.6 (d, C-1'), 52.3 (q, CO<sub>2</sub>CH<sub>3</sub>), 42.1 (s, C-2'), 27.8 (t, C-3'), 20.0 [d, CH(CH<sub>2</sub>)<sub>2</sub>], 14.6 [d, CH(CH<sub>2</sub>)<sub>2</sub>], 1.87 [t, CH(CH<sub>2</sub>)<sub>2</sub>], 1.75 [t, CH(CH<sub>2</sub>)<sub>2</sub>], 0.98 [t, CH(CH<sub>2</sub>)<sub>2</sub>], 0.75 [t, CH(CH<sub>2</sub>)<sub>2</sub>].

**8:**

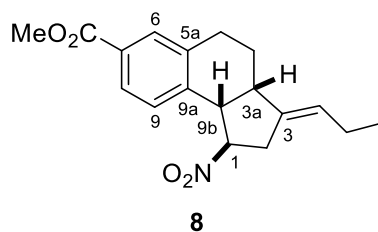

**TLC:**  $R_f = 0.53$  (P/Et<sub>2</sub>O = 19/1) [UV, KMnO<sub>4</sub>].

**IR** (ATR):  $\tilde{\nu}$  [cm<sup>-1</sup>] = 3423 (br), 2955 (w, C-H), 1720 (s, C=O), 1550 (s, C-NO<sub>2</sub>), 1437 (m, R<sub>2</sub>C-H<sub>2</sub>), 1368 (m, C-NO<sub>2</sub>), 1284 (s, O=C-OCH<sub>3</sub>), 1105 (m, O=C-OCH<sub>3</sub>), 762 (s, C<sub>ar</sub>-H).

**MS** (EI):  $m/z$  (%) = 284 (19) [M-OCH<sub>3</sub>]<sup>+</sup>, 253 (54), 149 (100) [C<sub>9</sub>H<sub>9</sub>O<sub>2</sub>]<sup>+</sup>, 115 (49), 91 (63) [C<sub>7</sub>H<sub>7</sub>]<sup>+</sup>.

**HRMS** (ESI): calcd for C<sub>18</sub>H<sub>22</sub>NO<sub>2</sub><sup>+</sup> [M+H]<sup>+</sup>: 316.1543; found: 316.1545.

**<sup>1</sup>H NMR** (500 MHz, CDCl<sub>3</sub>):  $\delta$  [ppm] = 7.80–7.77 (m, 2H, H-6, H-8), 7.14 (d, <sup>3</sup>*J* = 8.6 Hz, 1H, H-9), 5.46 (*virt.* tq, <sup>3</sup>*J* = 6.9 Hz, <sup>4</sup>*J*  $\cong$  <sup>4</sup>*J* = 2.4 Hz, 1H, C=CHCH<sub>2</sub>CH<sub>3</sub>), 4.88 (*virt.* q, <sup>3</sup>*J*  $\cong$  <sup>3</sup>*J* = 7.3 Hz, 1H, H-1), 3.96–3.91 (m, 1H, H-9b), 3.90 (s, 3H, CO<sub>2</sub>CH<sub>3</sub>), 3.11–2.95 (m, 2H, H-3a, CHH-2), 2.95–2.80 (m, 2H, CHH-2, CHH-5), 2.78–2.66 (m, 1H, CHH-5), 2.08–1.96 (m, 2H, C=CHCH<sub>2</sub>CH<sub>3</sub>), 1.91–1.81 (m, 1H, CHH-4), 1.68 (dtd, <sup>2</sup>*J* = 13.9 Hz, <sup>3</sup>*J* = 9.3 Hz, 4.8 Hz, 1H, CHH-4), 1.00 (t, <sup>3</sup>*J* = 7.5 Hz, 3H, C=CHCH<sub>2</sub>CH<sub>3</sub>).

**<sup>13</sup>C NMR** (126 MHz, CDCl<sub>3</sub>):  $\delta$  [ppm] = 138.7 (s, C-3), 137.1 (s, C-5a), 134.4 (s, C-9a), 129.3 (d, C-6), 128.6 (d, C-9), 127.2 (d, C-8), 126.6 (d, C-7), 125.9 (d, C=CHCH<sub>2</sub>CH<sub>3</sub>), 92.2 (d, C-1), 52.3 (q, CO<sub>2</sub>CH<sub>3</sub>), 47.7 (d, C-9b), 42.0 (d, C-3a), 34.6 (t, C-2), 27.8 (t, C-5), 27.3 (t, C-4), 22.8 (t, C=CHCH<sub>2</sub>CH<sub>3</sub>), 14.1 (q, C=CHCH<sub>2</sub>CH<sub>3</sub>).

**(E)-1-Nitro-3-(propylidene-3-*d*)-2,3,3a,4,5,9b-hexahydro-1*H*-cyclopenta[*a*]naphthalene-6,7,8,9-*d*<sub>4</sub> (7-*d*<sub>5</sub>)**

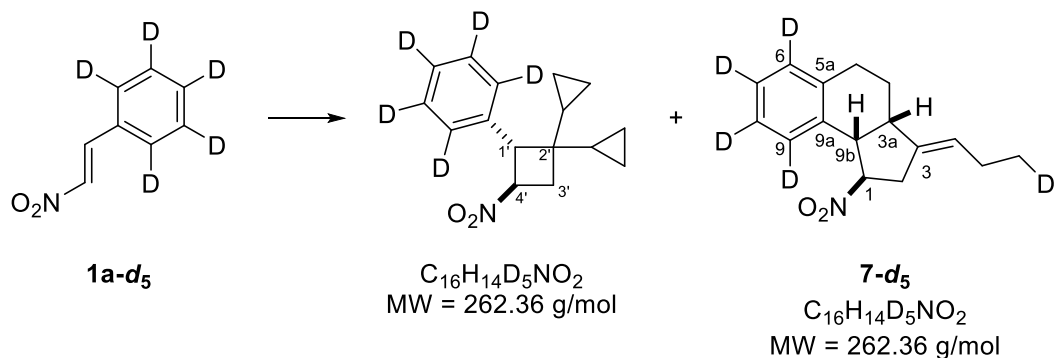

Following **GP 5**, a solution of nitroethene **1a-*d*<sub>5</sub>** (62.0 mg, 402  $\mu$ mol, 1.00 equiv) and ethene-1,1-diylidicyclopropane (435 mg, 4.02 mmol, 10.0 equiv) in dichloromethane (20 mL) was irradiated at  $\lambda = 419$  nm (fluorescent lamps) for 14 hours at room temperature. The crude product was purified by column chromatography (3  $\times$  20 cm, P/Et<sub>2</sub>O = 40/1) to yield 1-(2',2'-Dicyclopropyl-4'-nitrocyclobutyl)-benzene-2,3,4,5,6-*d*<sub>5</sub> (64.0 mg, 244  $\mu$ mol, 61%) and the side product **7-*d*<sub>5</sub>** (11.5 mg, 43.8  $\mu$ mol, 11%) both as a yellow coloured oil.

**1-(2',2'-Dicyclopropyl-4'-nitrocyclobutyl)-benzene-2,3,4,5,6-*d*<sub>5</sub>**

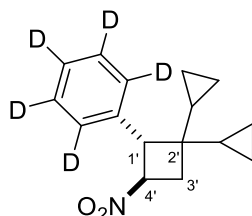

**TLC:**  $R_f = 0.60$  (P/Et<sub>2</sub>O = 19/1) [UV, KMnO<sub>4</sub>].

**IR** (ATR):  $\tilde{\nu}$  [cm<sup>-1</sup>] = 3079 (w, C<sub>cyclopropyl</sub>-H), 3003 (w, C<sub>ar</sub>-H), 2275 (w), 1542 (s, C NO<sub>2</sub>), 1369 (m, C-NO<sub>2</sub>), 1018 (m), 824 (w, C<sub>ar</sub>-H), 696 (w, CH).

**MS** (EI):  $m/z$  (%) = 216 (8) [M-NO<sub>2</sub>]<sup>+</sup>, 173 (10), 133 (15) [C<sub>10</sub>H<sub>5</sub>D<sub>5</sub>]<sup>+</sup>, 122 (100) [C<sub>9</sub>H<sub>4</sub>D<sub>5</sub>]<sup>+</sup>, 96 (15) [C<sub>7</sub>H<sub>2</sub>D<sub>5</sub>]<sup>+</sup>, 79 (20).

**HRMS** (ESI): calcd for C<sub>16</sub>H<sub>15</sub>D<sub>5</sub>NO<sub>2</sub><sup>+</sup> [M+H]<sup>+</sup>: 263.1802; found: 263.1803.

**<sup>1</sup>H NMR** (400 MHz, CDCl<sub>3</sub>): δ [ppm] = 5.20 (*virt.* q, <sup>3</sup>*J* ≅ <sup>3</sup>*J* = 8.7 Hz, 1H, H-4'), 3.97 (d, <sup>3</sup>*J* = 9.2 Hz, 1H, H-1'), 2.06 (dd, <sup>2</sup>*J* = 12.2 Hz, <sup>3</sup>*J* = 8.7 Hz, 1H, CHH-3'), 1.71 (dd, <sup>3</sup>*J* = 12.2 Hz, <sup>3</sup>*J* = 8.3 Hz, 1H, CHH-3'), 1.09 [tt, <sup>3</sup>*J* = 8.3 Hz, 5.5 Hz, 1H, CH(CH<sub>2</sub>)<sub>2</sub>], 0.56–0.26 [m, 8H, CH(CH<sub>2</sub>)<sub>2</sub>, CH(CH<sub>2</sub>)<sub>2</sub>], 0.20–0.12 [m, 1H, CH(CH<sub>2</sub>)<sub>2</sub>].

**<sup>13</sup>C NMR** (101 MHz, CDCl<sub>3</sub>): δ [ppm] = 136.2 (s, C<sub>ar</sub>), 76.6 (d, C-4'), 55.4 (d, C-1'), 41.7 (s, C-2'), 27.8 (t, C-3'), 20.2 [d, CH(CH<sub>2</sub>)<sub>2</sub>], 14.6 [d, CH(CH<sub>2</sub>)<sub>2</sub>], 1.93 [t, CH(CH<sub>2</sub>)<sub>2</sub>], 1.73 [t, CH(CH<sub>2</sub>)<sub>2</sub>], 0.90 [t, CH(CH<sub>2</sub>)<sub>2</sub>], 0.73 [t, CH(CH<sub>2</sub>)<sub>2</sub>].

The aromatic <sup>13</sup>C-signals of carbons connected to deuterium-atoms were not visible in the <sup>13</sup>C-spectrum.

### 7-*d*<sub>5</sub>:

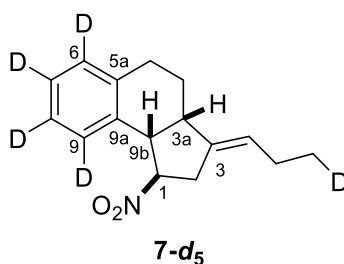

**TLC:** *R*<sub>f</sub> = 0.70 (P/Et<sub>2</sub>O = 19/1) [UV, KMnO<sub>4</sub>].

**IR** (ATR):  $\tilde{\nu}$  [cm<sup>-1</sup>] = 3418 (br), 2928 (w, CR<sub>3</sub>-H), 1711 (w), 1547 (s, C-NO<sub>2</sub>), 1368 (m, C-NO<sub>2</sub>), 1261 (w), 1024 (m), 858 (m, C<sub>ar</sub>-H), 803 (w), 752 (m, R<sub>2</sub>C=CHR).

**MS** (EI): *m/z* (%) = 215 (65) [M-NO<sub>2</sub>]<sup>+</sup>, 185 (100) [M-NO<sub>2</sub>-C<sub>2</sub>H<sub>4</sub>]<sup>+</sup>, 171 (36), 132 (20) [C<sub>10</sub>H<sub>4</sub>D<sub>4</sub>]<sup>+</sup>, 95 (6) [C<sub>7</sub>H<sub>3</sub>D<sub>4</sub>]<sup>+</sup>.

**HRMS** (ESI): calcd for C<sub>16</sub>H<sub>15</sub>D<sub>5</sub>NO<sub>2</sub><sup>+</sup> [M+H]<sup>+</sup>: 263.1802; found: 263.1804.

**<sup>1</sup>H NMR** (400 MHz, CDCl<sub>3</sub>): δ [ppm] = 5.45 (tq, <sup>3</sup>*J* = 7.1 Hz, <sup>4</sup>*J* = 2.4 Hz, 1H, C=CHCH<sub>2</sub>CH<sub>3</sub>), 4.90 (*virt.* q, <sup>3</sup>*J* ≅ <sup>3</sup>*J* = 7.4 Hz, 1H, H-1), 3.90 (*virt.* t, <sup>3</sup>*J* ≅ <sup>3</sup>*J* = 7.6 Hz, 1H, H-9b), 3.08–2.94 (m, 2H, H-3a, CHH-2), 2.90 (dd, <sup>2</sup>*J* = 17.3 Hz, <sup>3</sup>*J* = 7.8 Hz, 1H, CHH-2), 2.81–2.75 (m, 1H, CHH-5), 2.69 (ddd, <sup>2</sup>*J* = 16.4 Hz, <sup>3</sup>*J* = 9.1 Hz, 4.8 Hz, 1H, CHH-5), 2.05–1.98 (m, 2H, C=CHCH<sub>2</sub>CH<sub>3</sub>), 1.89–1.79 (m, 1H, CHH-4), 1.67 (dtd, <sup>2</sup>*J* = 14.0 Hz, <sup>3</sup>*J* = 9.4 Hz, 4.8 Hz, 1H, CHH-4), 0.98 (tt, <sup>3</sup>*J* = 7.6 Hz, <sup>2</sup>*J* = 2.1 Hz, 3H, CH<sub>3</sub>).

**<sup>13</sup>C NMR** (101 MHz, CDCl<sub>3</sub>): δ [ppm] = 138.8 (s, C-3), 137.0 (s, C-5a), 134.4 (s, C-9a), 126.0 (d, C=CHCH<sub>2</sub>CH<sub>2</sub>D), 92.2 (d, C-1), 47.6 (d, C-9b), 42.1 (d, C-3a), 34.6 (t, C-2), 27.7 (t, C-5), 27.3 (t, C-4), 22.8 (t, C=CHCH<sub>2</sub>CH<sub>2</sub>D), 14.1 (t, <sup>1</sup>J<sub>CD</sub> = 19.4 Hz C=CHCH<sub>2</sub>CH<sub>2</sub>D).

The aromatic <sup>13</sup>C-signals of carbons connected to deuterium-atoms were not visible in the <sup>13</sup>C-spectrum.



## 7. UV Vis Spectra of Nitroethenes 1a-1o

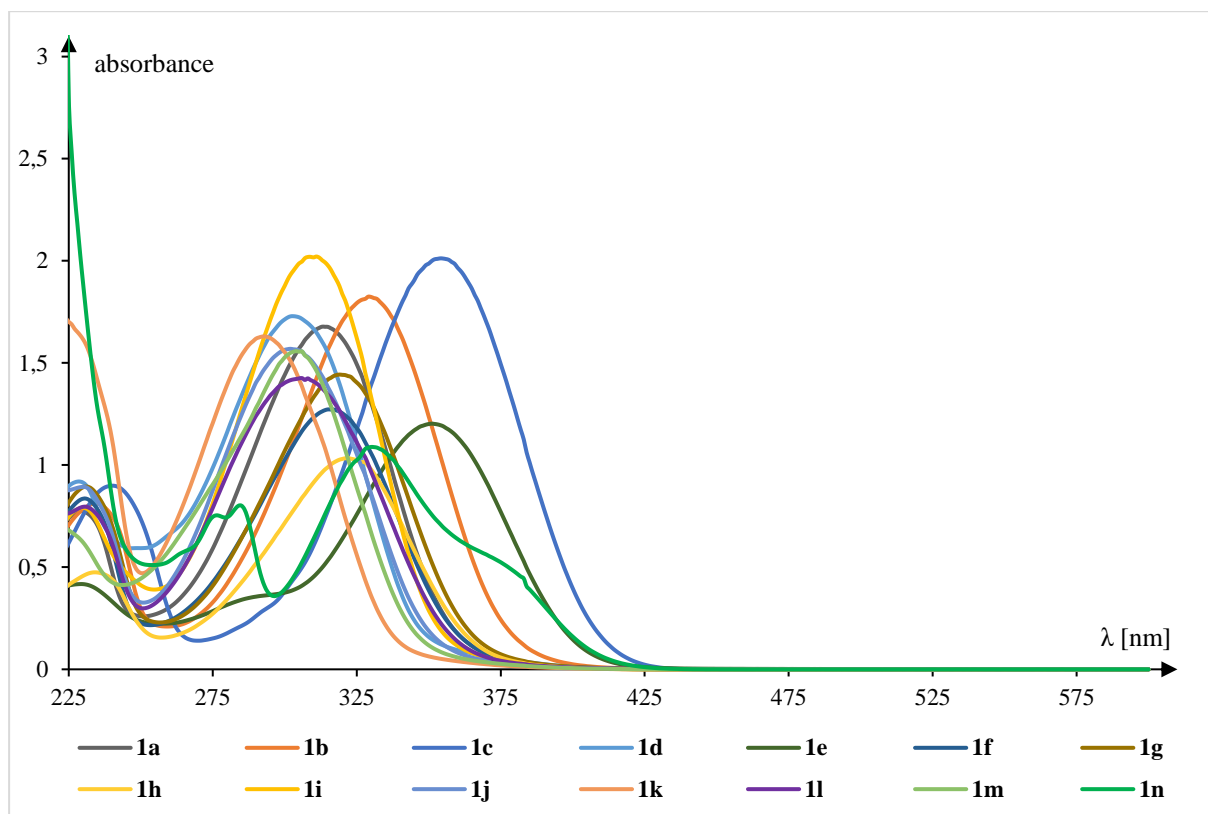

**Figure S1.** UV-Vis spectra of nitroethenes **1a-1n** (c = 1 mM, CH<sub>2</sub>Cl<sub>2</sub>).

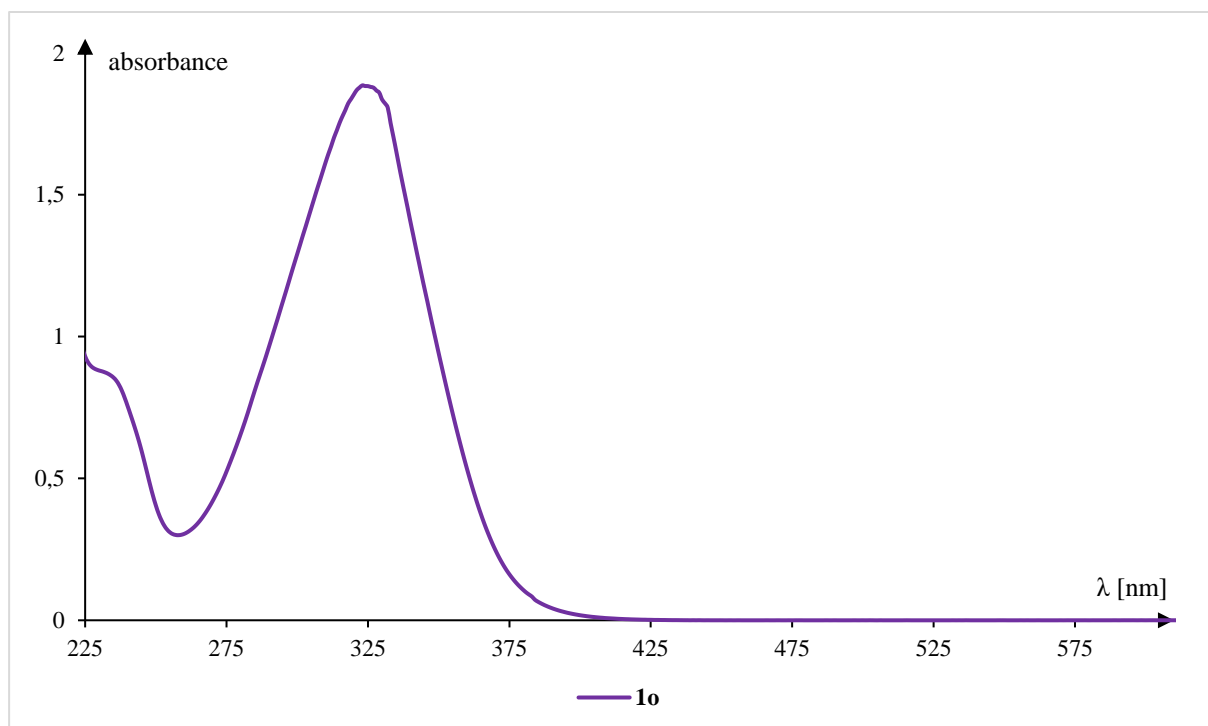

**Figure S2.** UV-Vis spectrum of nitroethene **1o** (c = 1 mM, CH<sub>2</sub>Cl<sub>2</sub>).

## 8. Luminescence Spectroscopy and Determination of $E_T$ of Nitroethene **1a**

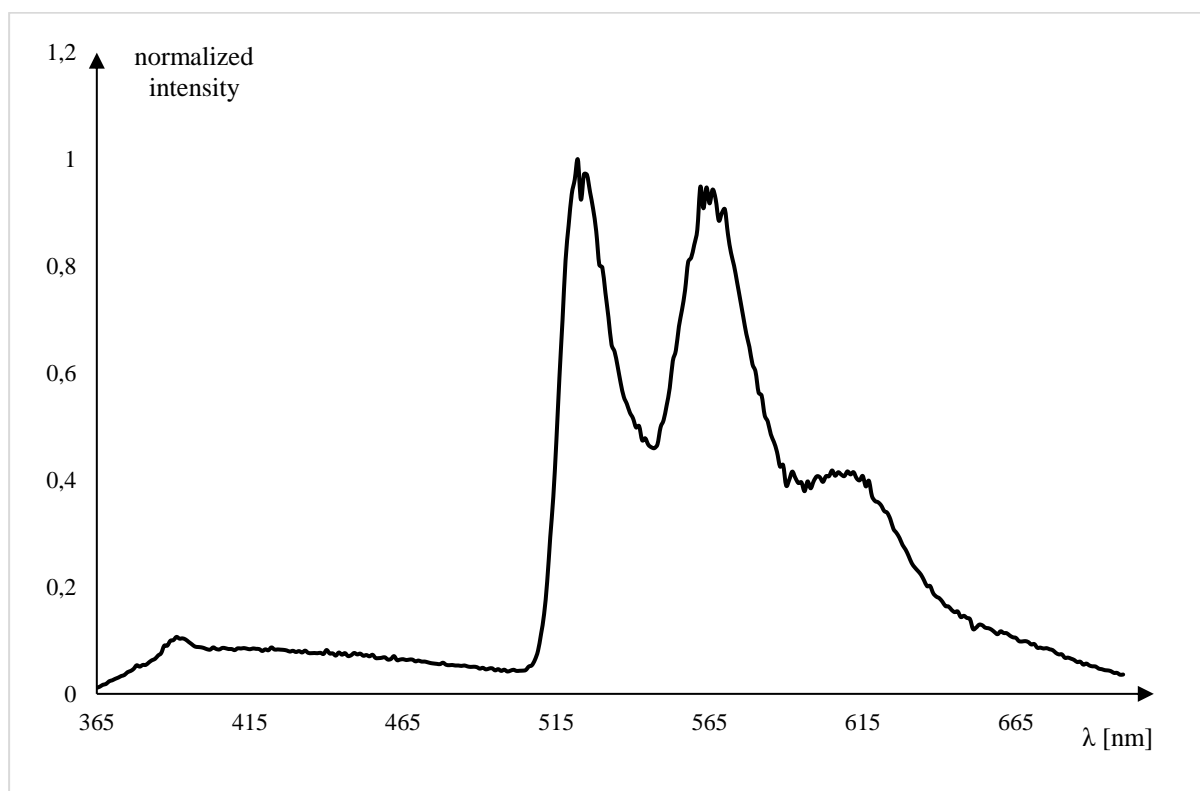

**Figure S3.** Phosphorescence spectrum of nitroethene **1a** ( $c = 300 \mu\text{M}$ , EtOH, 77 K) (Excitation at  $\lambda = 350 \text{ nm}$ , pulsed, flash delay  $50 \mu\text{s}$ ).

The triplet energy  $E_T$  has been calculated from the emission maximum  $\lambda_{\text{max}}(0,0) = 523 \text{ nm}$ , which corresponds to  $E_T = 229 \text{ kJ/mol}$  (in EtOH). This is in accordance with findings in the literature, with a measured emission of  $\lambda = 524 \text{ nm}$  ( $E_T = 228 \text{ kJ/mol}$ ) in ethanol as the solvent.<sup>[20]</sup>

## 9. NMR Spectra

The NMR-Spectra of nitroethenes **1b-1e** and nitrocyclobutanes **2a-2e** as well as **3a**, **3b** and **3j** have already been published elsewhere and are therefore not included in this supporting information.<sup>synlett</sup>

**(E)-1-Fluoro-4-(2'-nitrovinyl)benzene (1f): <sup>1</sup>H NMR (500 MHz, CDCl<sub>3</sub>):**

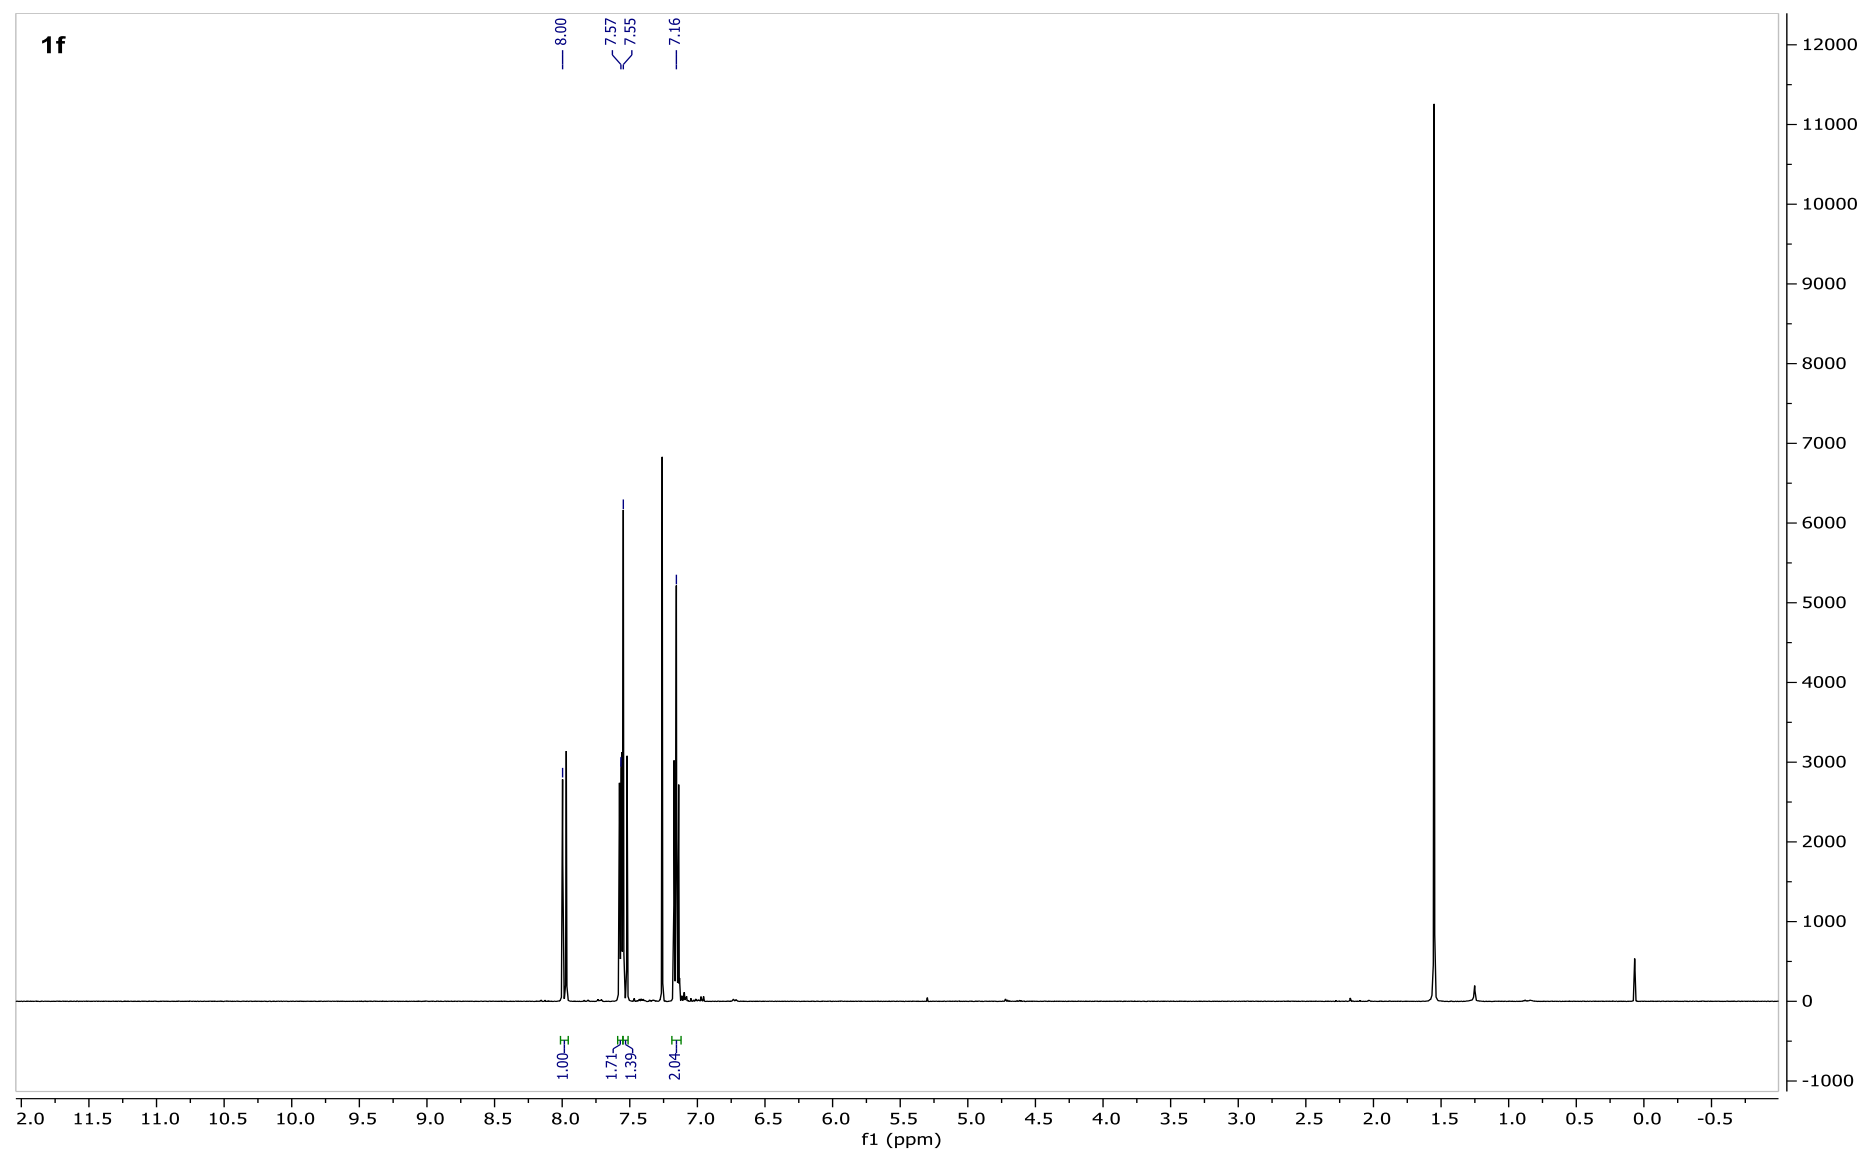

$^{13}\text{C}$  NMR (75 MHz,  $\text{CDCl}_3$ ):

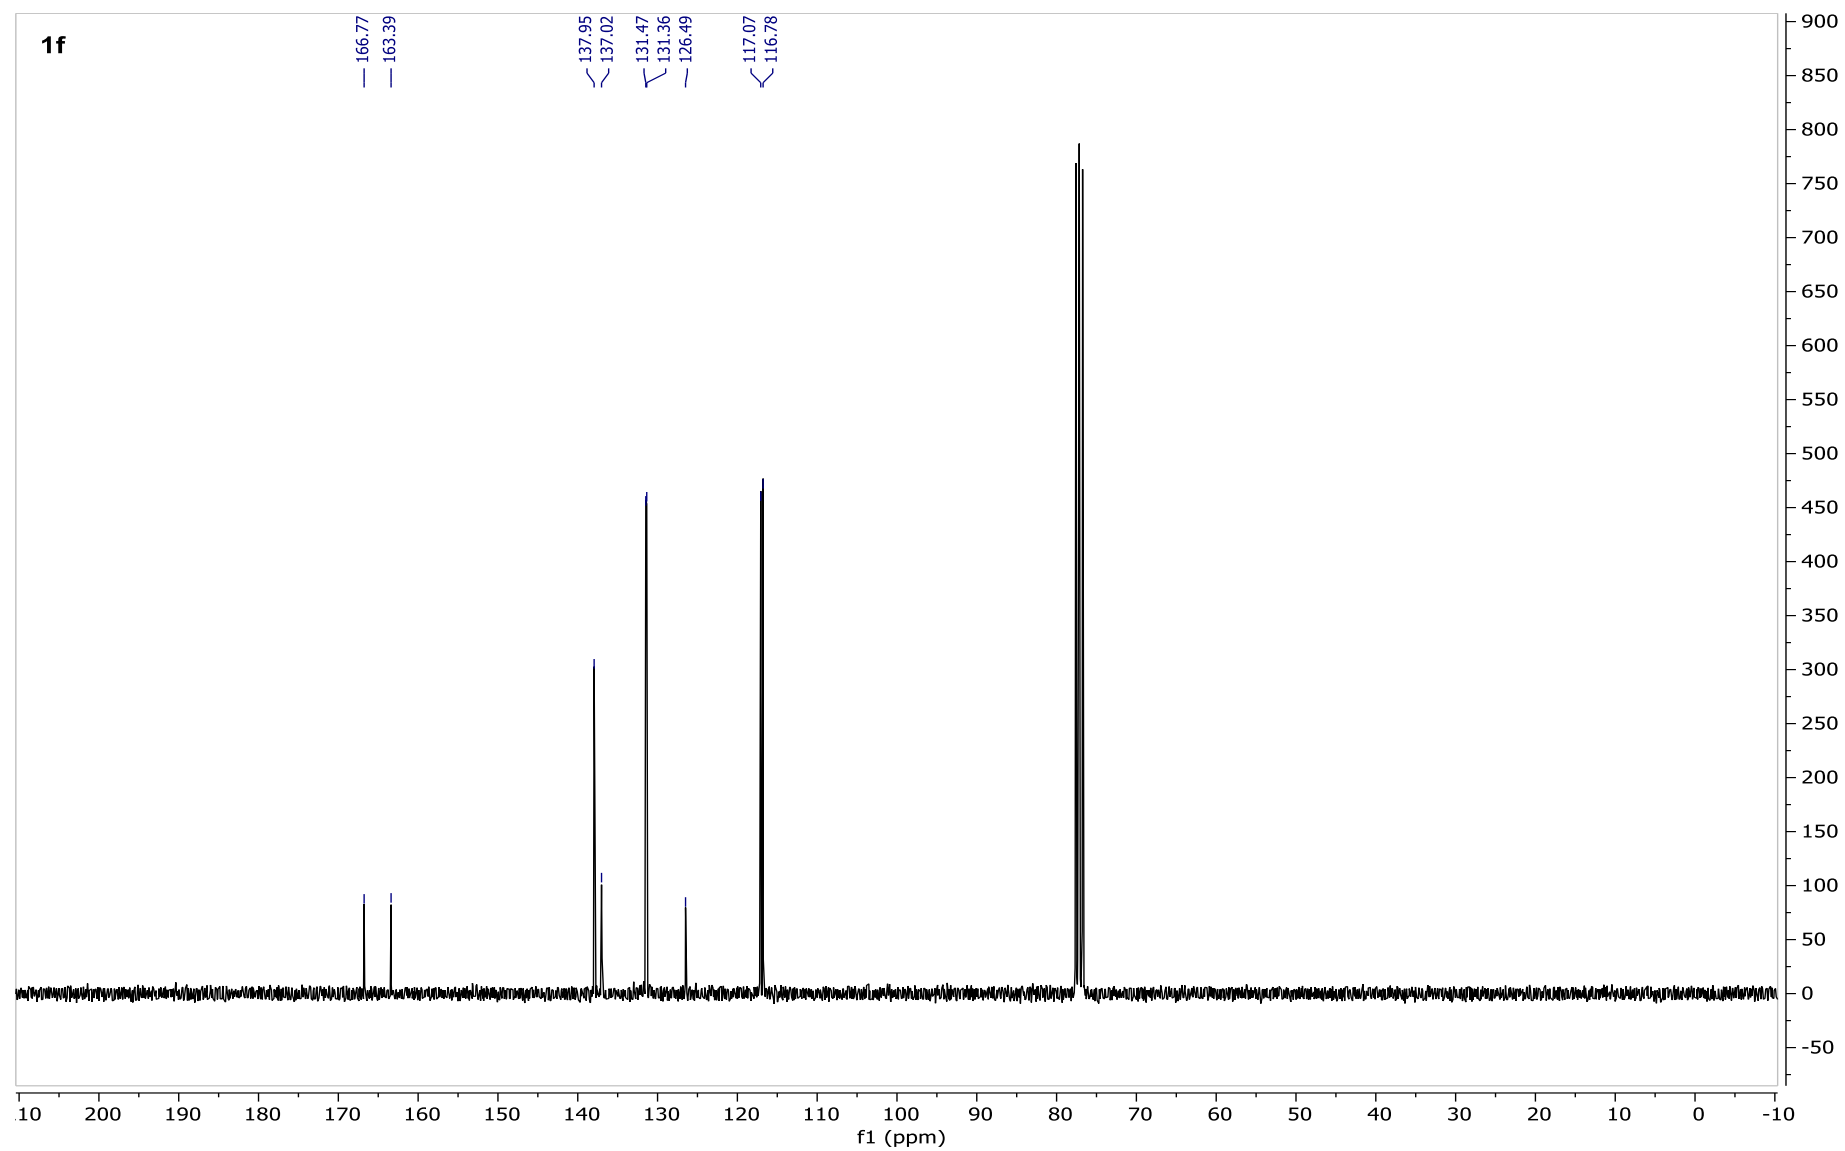

**(E)-1-Chloro-4-(2'-nitrovinyl)benzene (1g): <sup>1</sup>H NMR (500 MHz, CDCl<sub>3</sub>):**

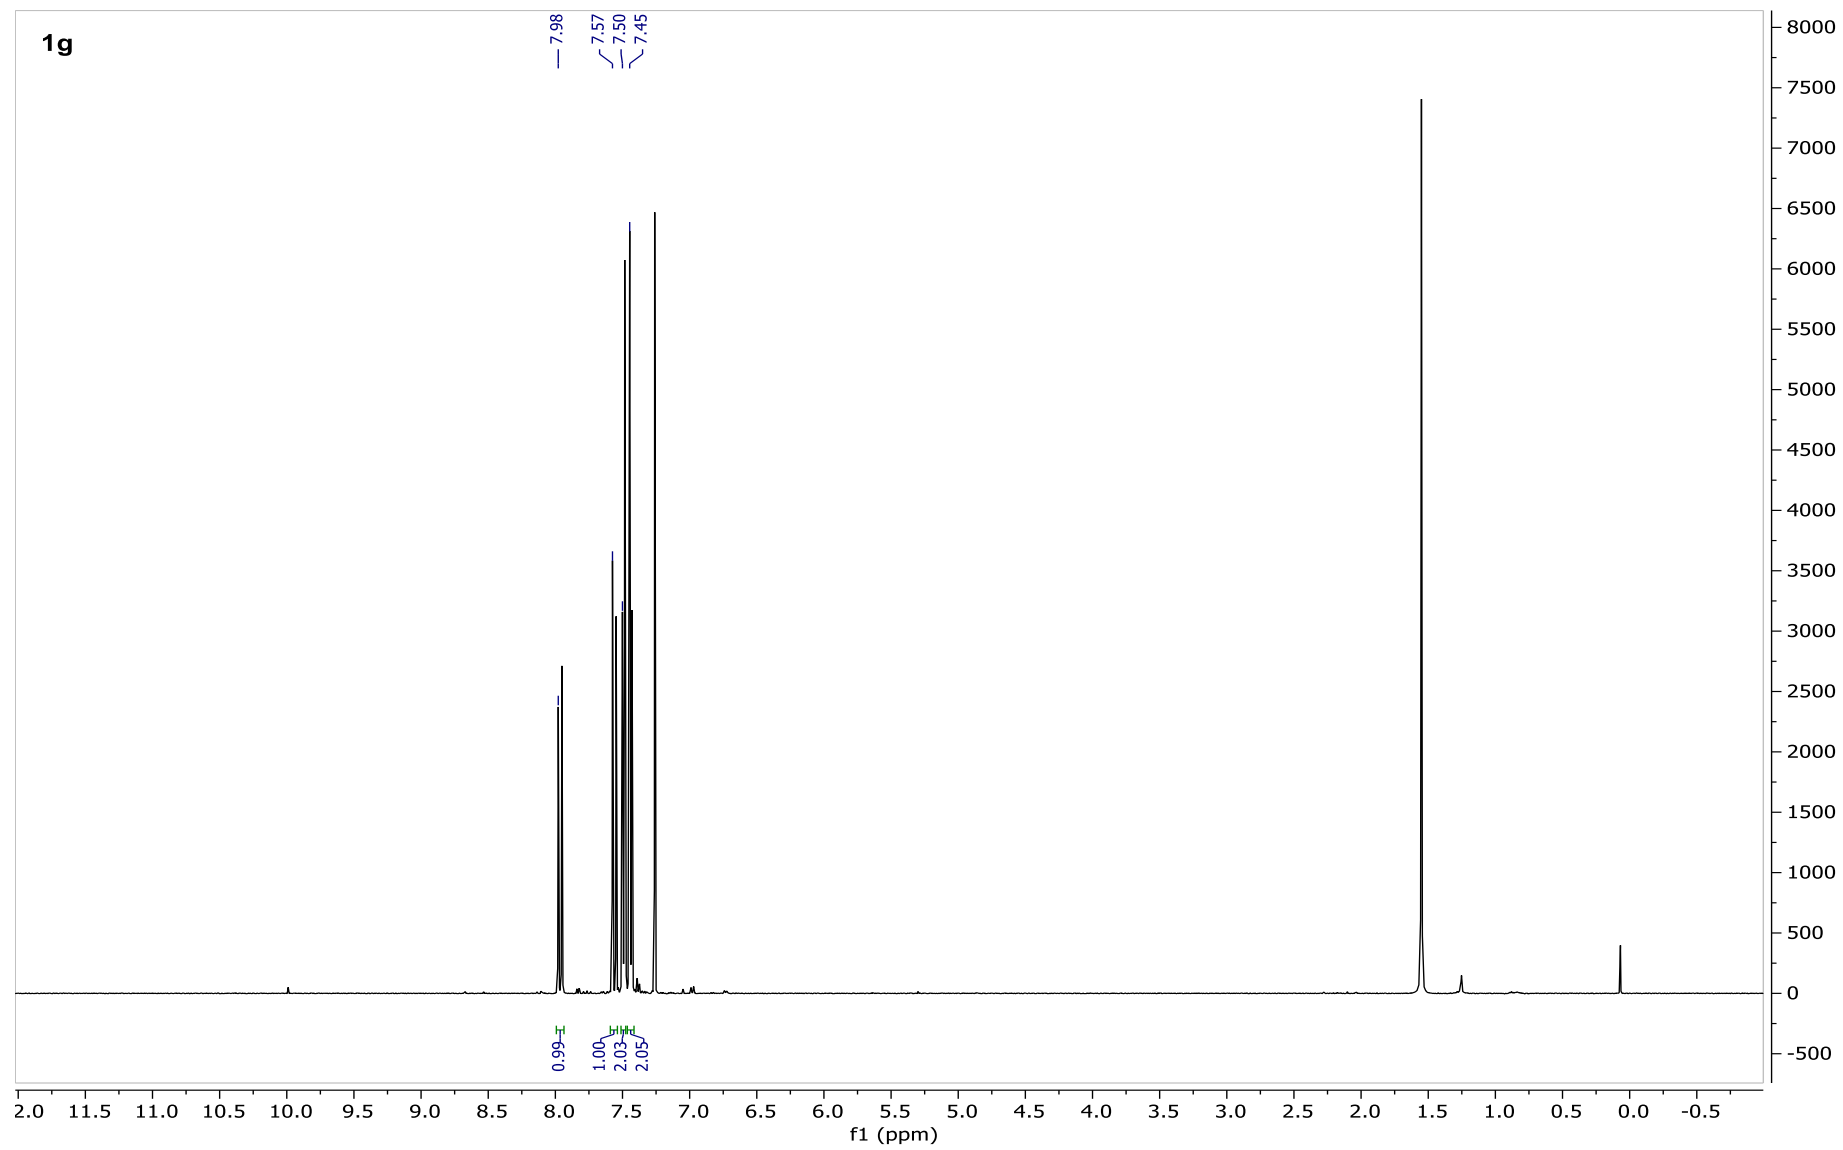

$^{13}\text{C}$  NMR (101 MHz,  $\text{CDCl}_3$ ):

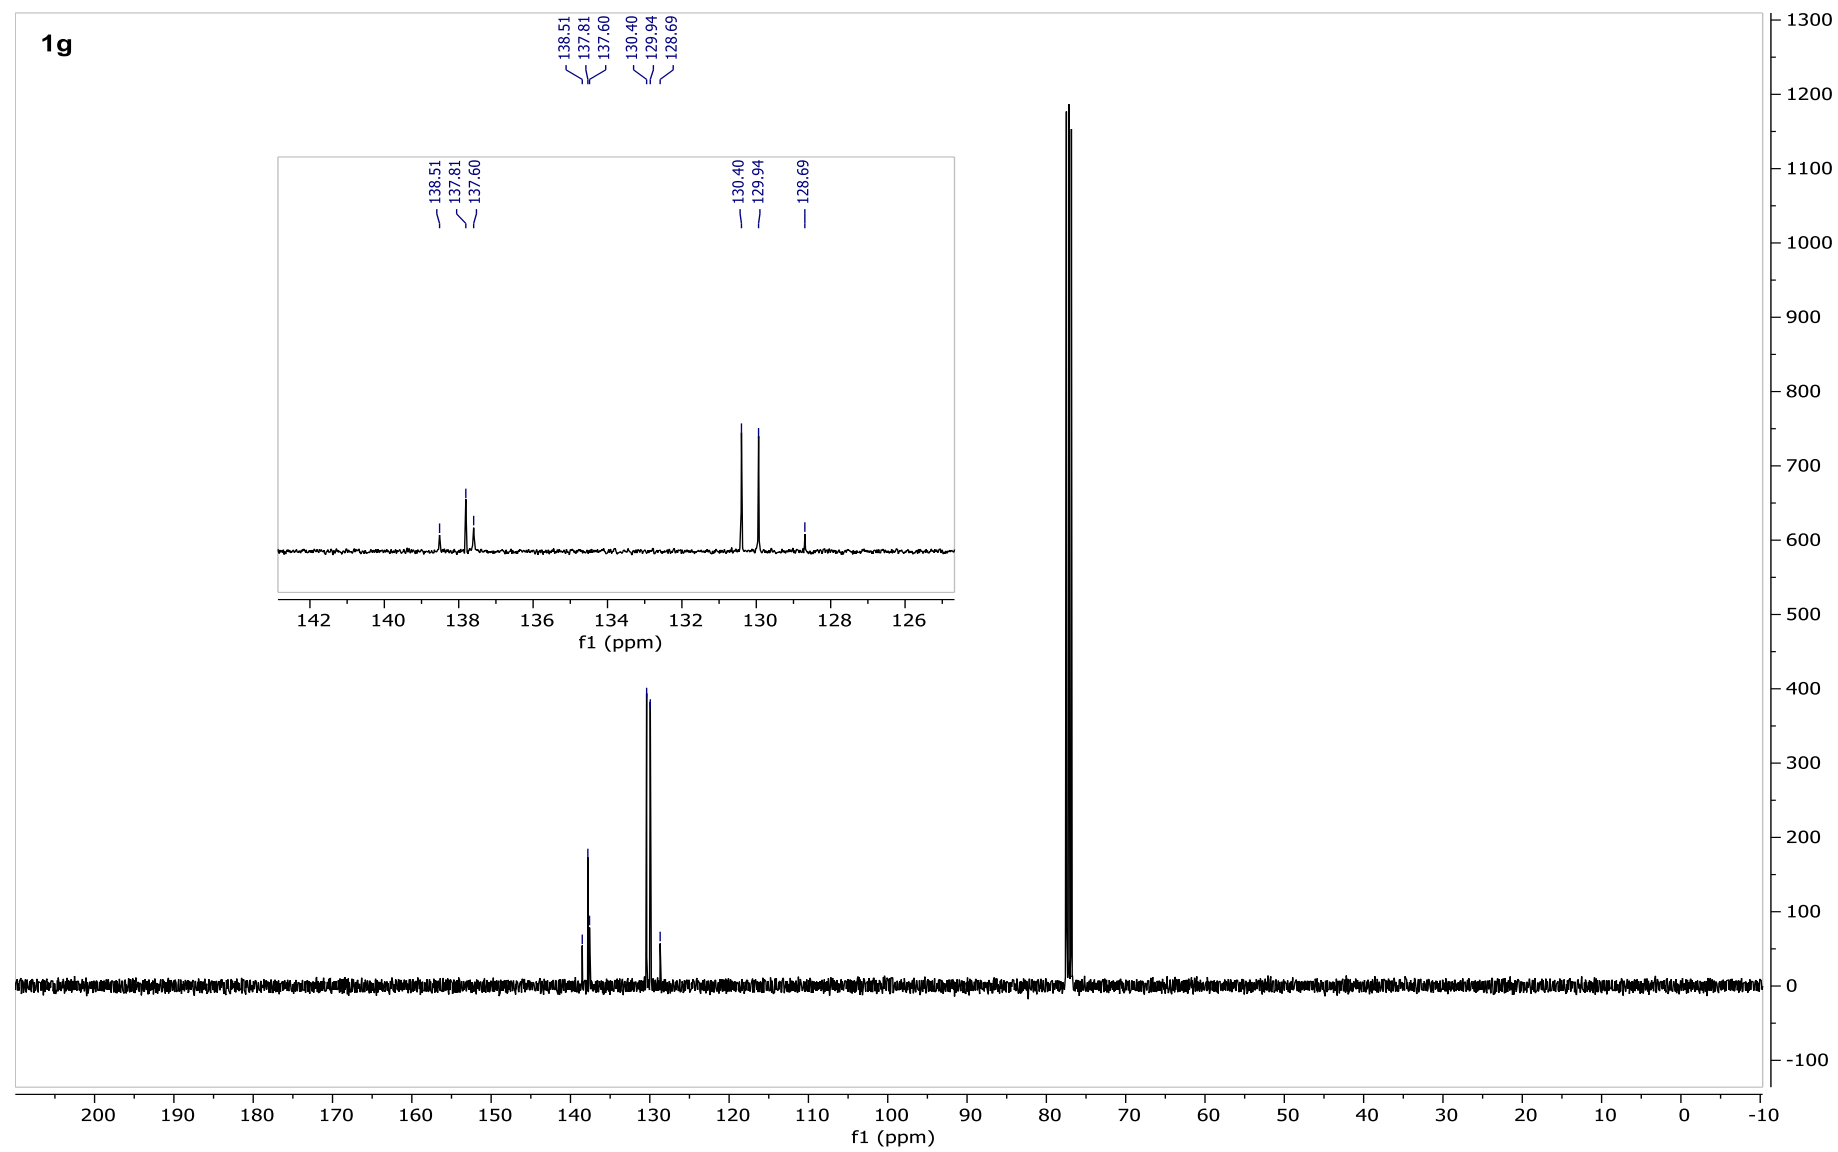

**(E)-1-Bromo-4-(2'-nitrovinyl)benzene (1h): <sup>1</sup>H NMR (500 MHz, CDCl<sub>3</sub>):**

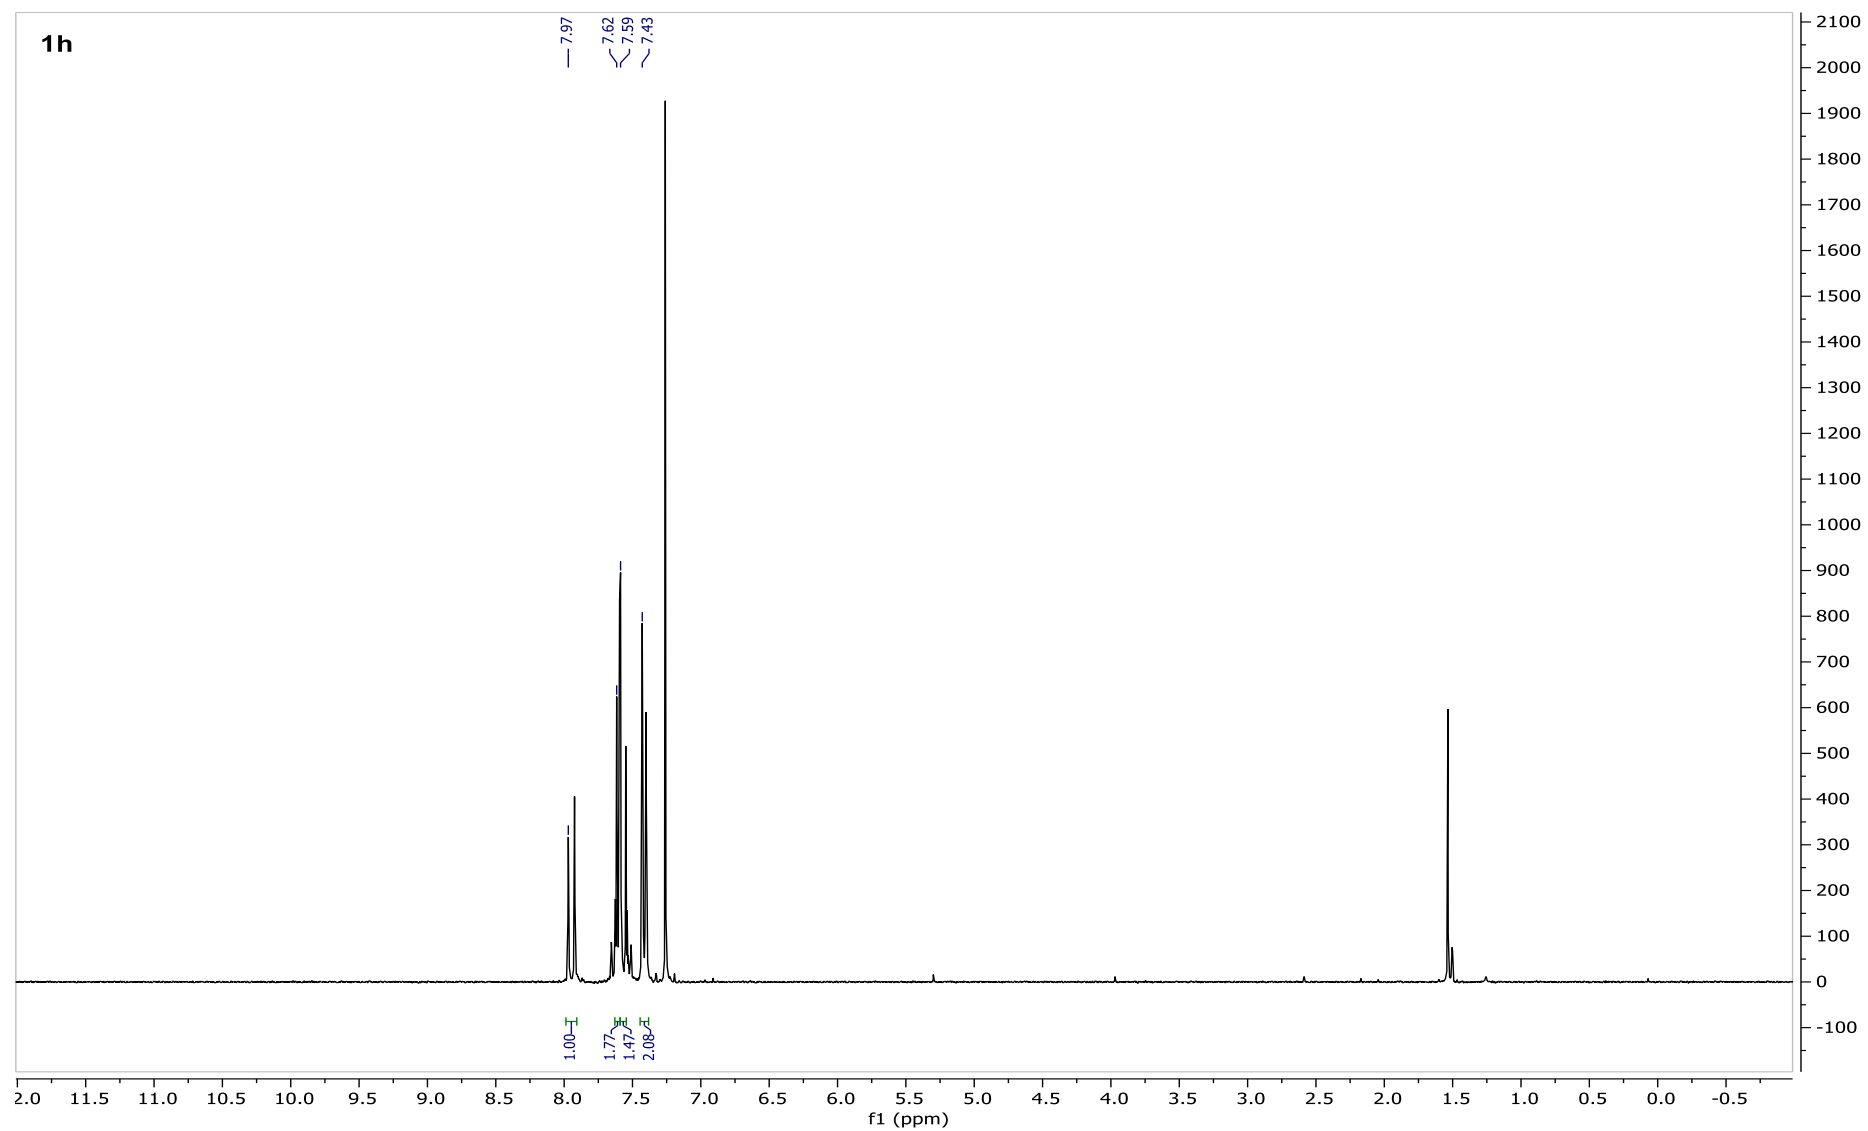



<sup>13</sup>C NMR (101 MHz, CDCl<sub>3</sub>):

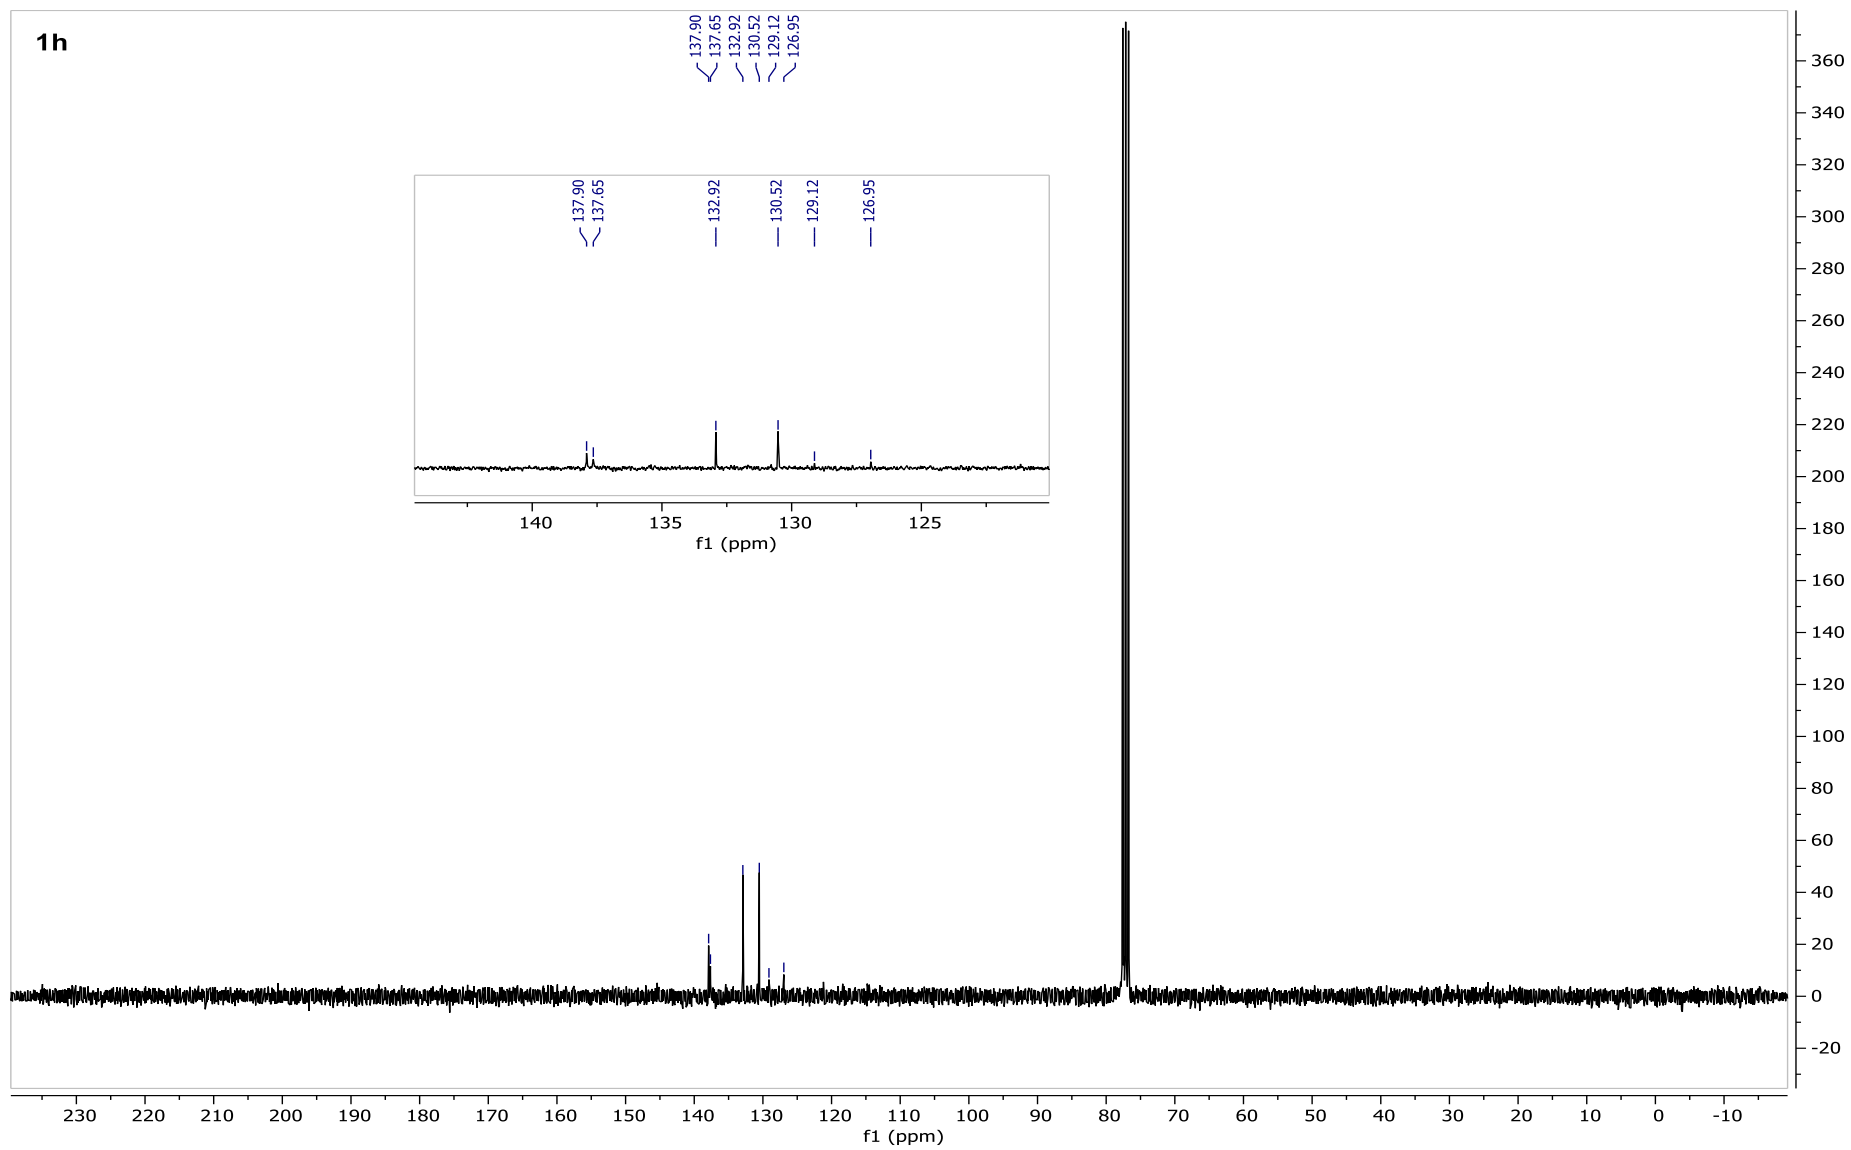

**Methyl (*E*)-4-(2'-nitrovinyl)benzoate (1i): <sup>1</sup>H NMR (500 MHz, CDCl<sub>3</sub>):**

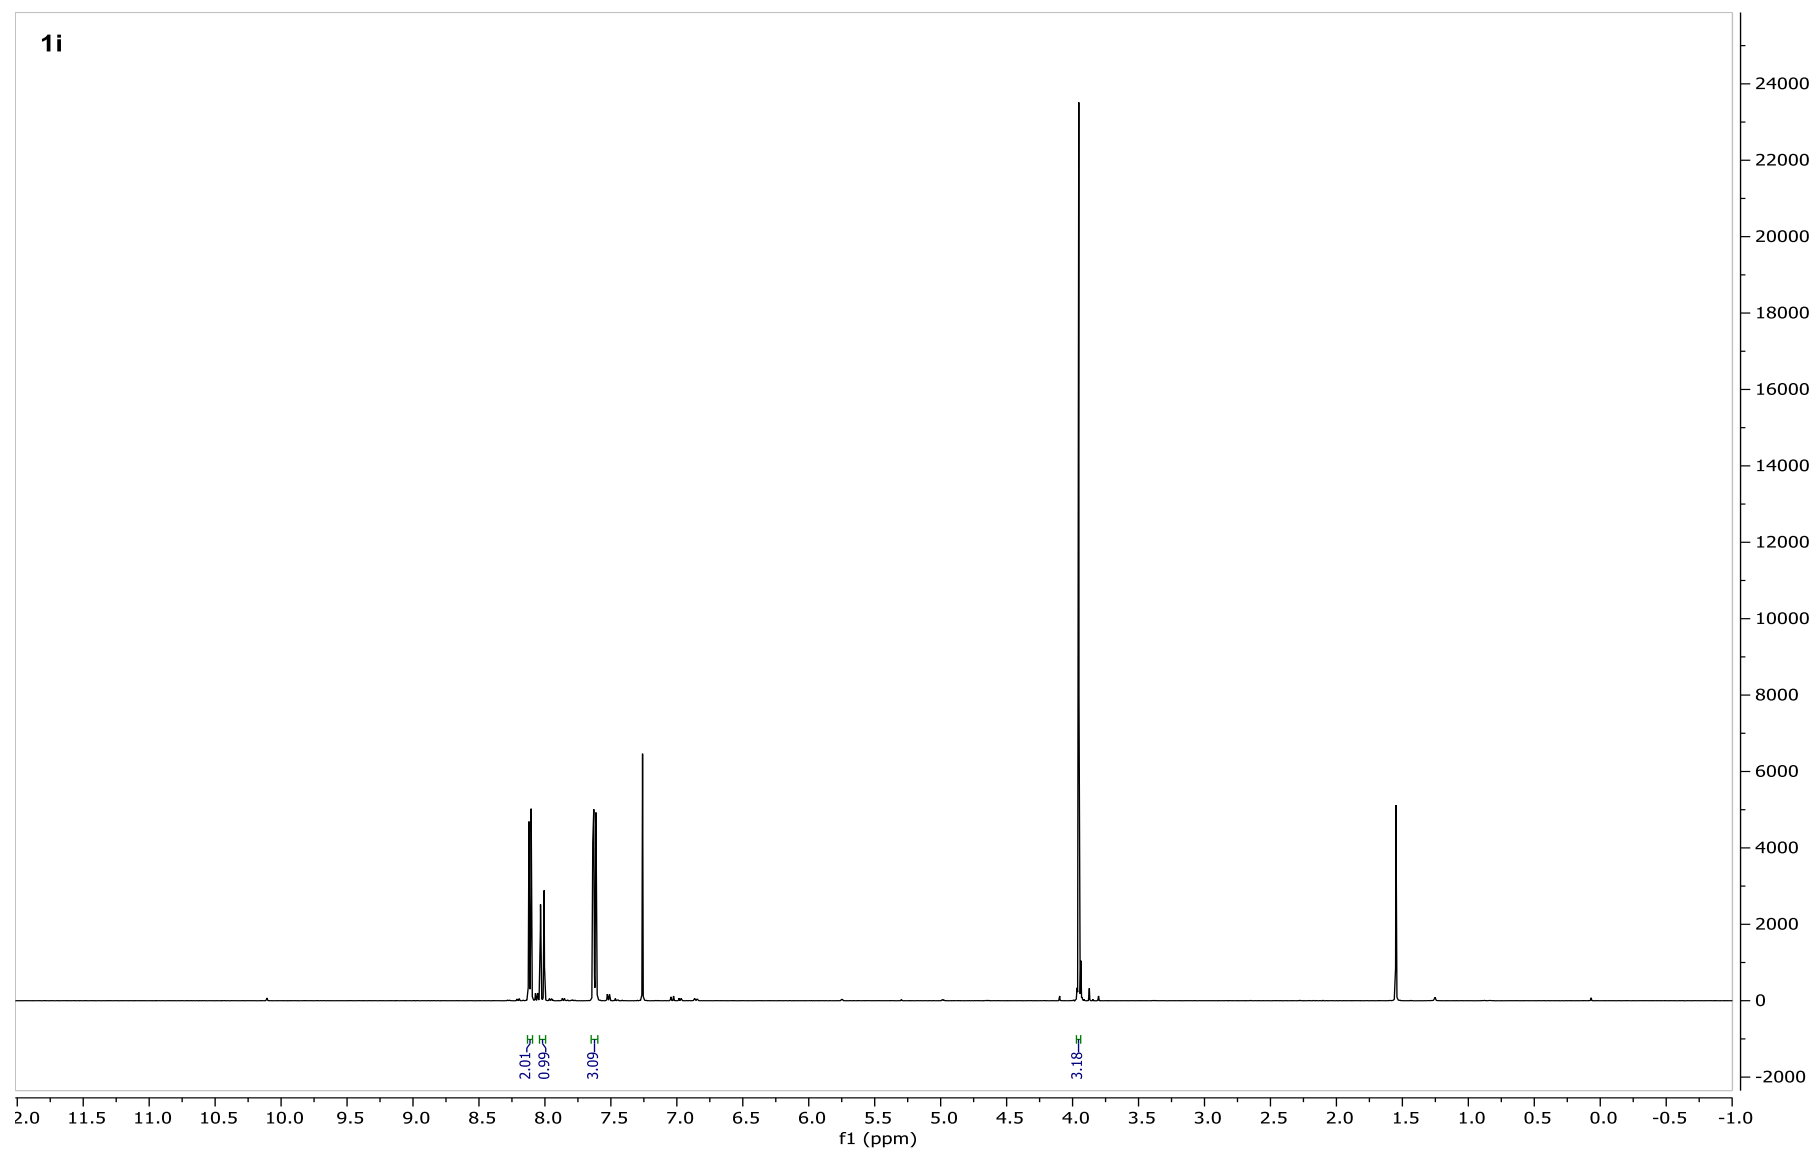

$^{13}\text{C}$  NMR (101 MHz,  $\text{CDCl}_3$ ):

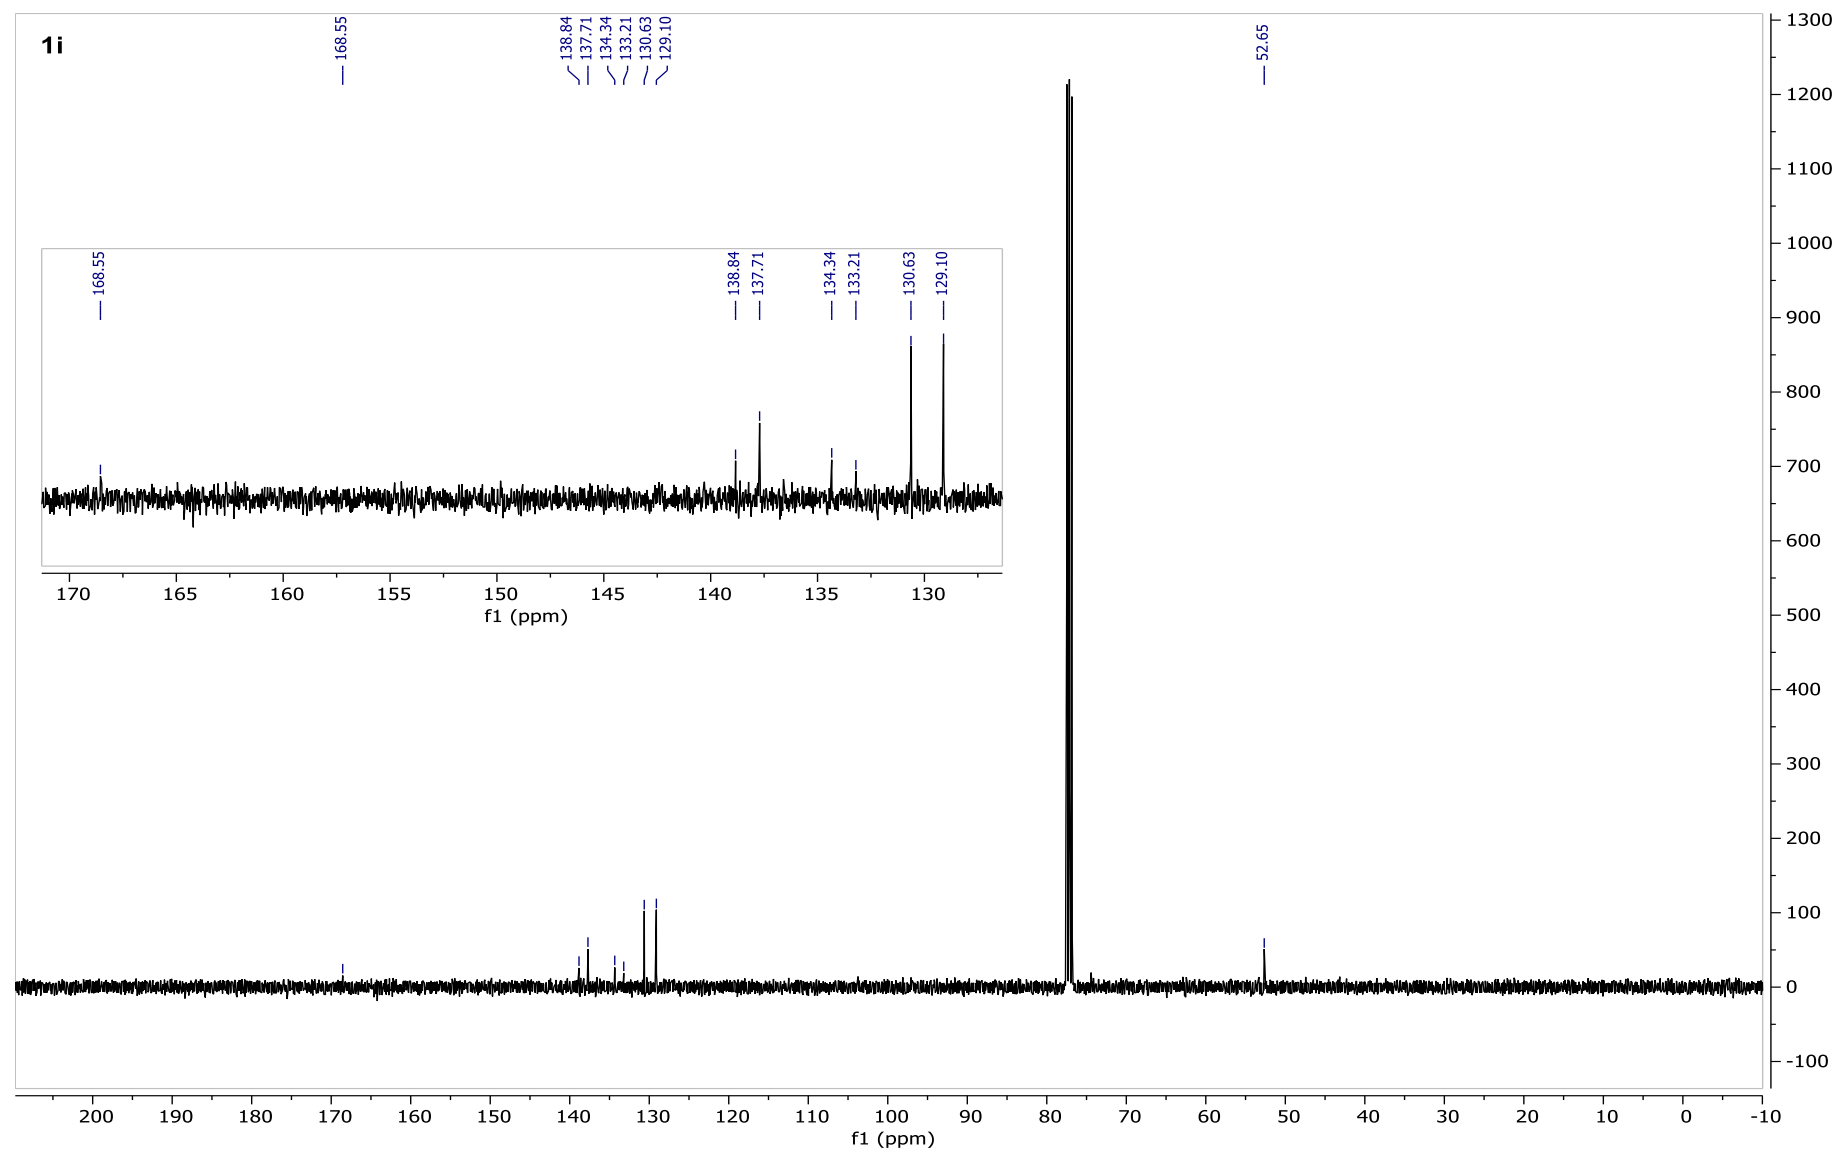

**(E)-1-Chloro-3-(2'-nitrovinyl)benzene (1j); <sup>1</sup>H NMR (500 MHz, CDCl<sub>3</sub>):**

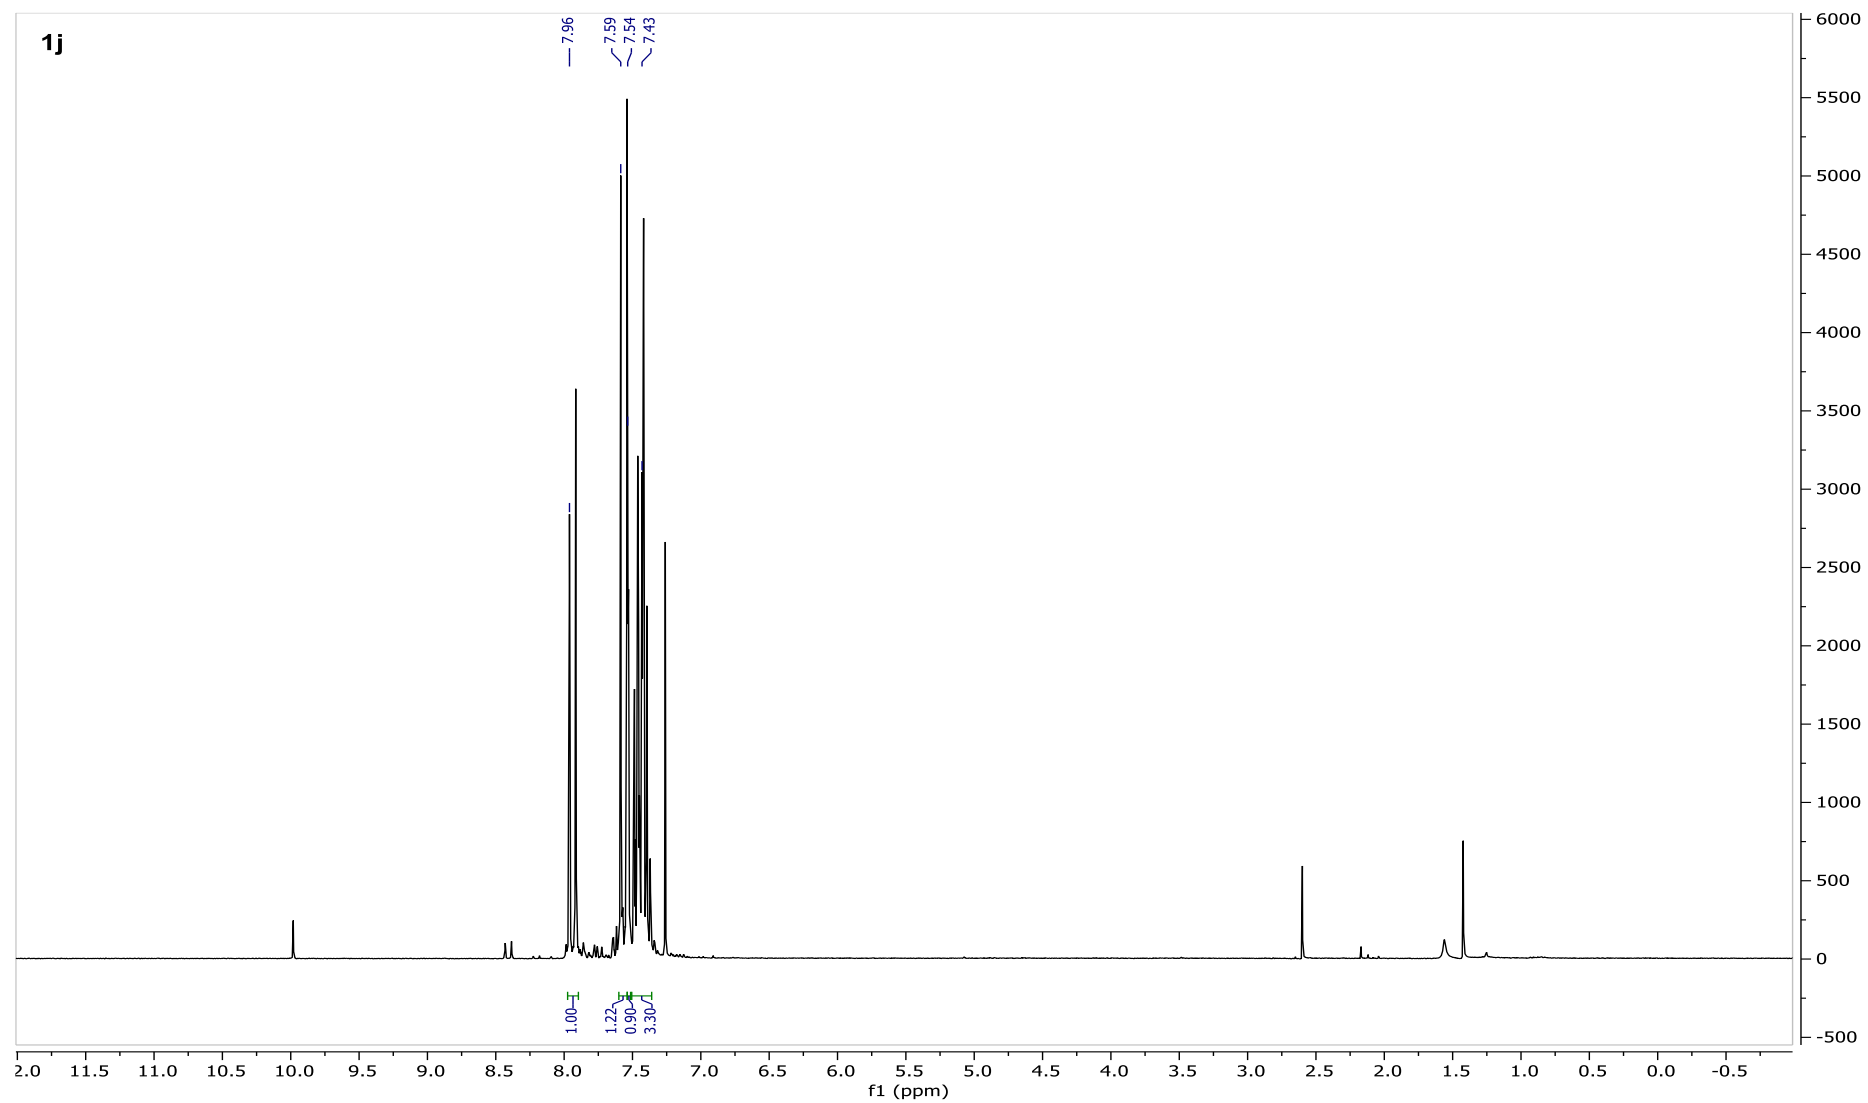

<sup>13</sup>C NMR (101 MHz, CDCl<sub>3</sub>):

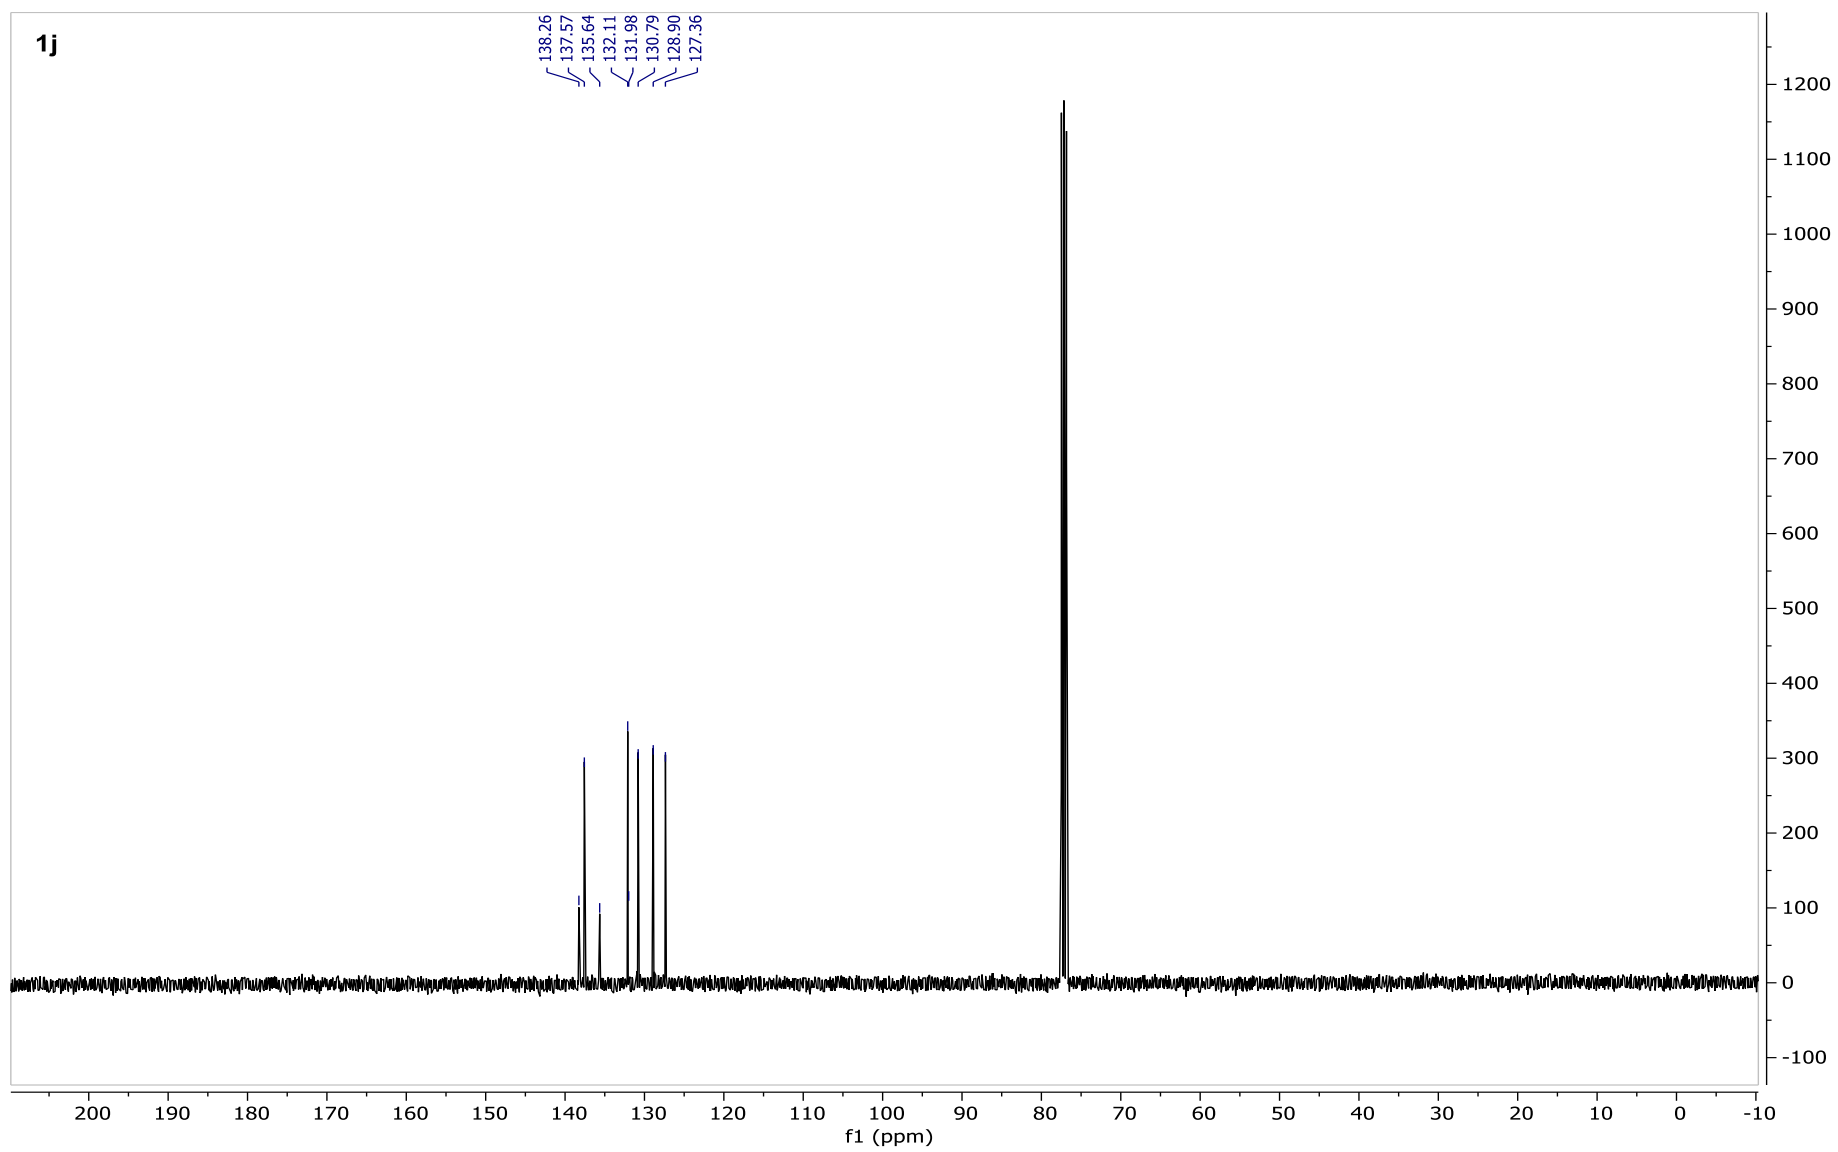

**(E)-3-(2'-Nitrovinyl)benzotrile (1k): <sup>1</sup>H NMR (500 MHz, CDCl<sub>3</sub>):**

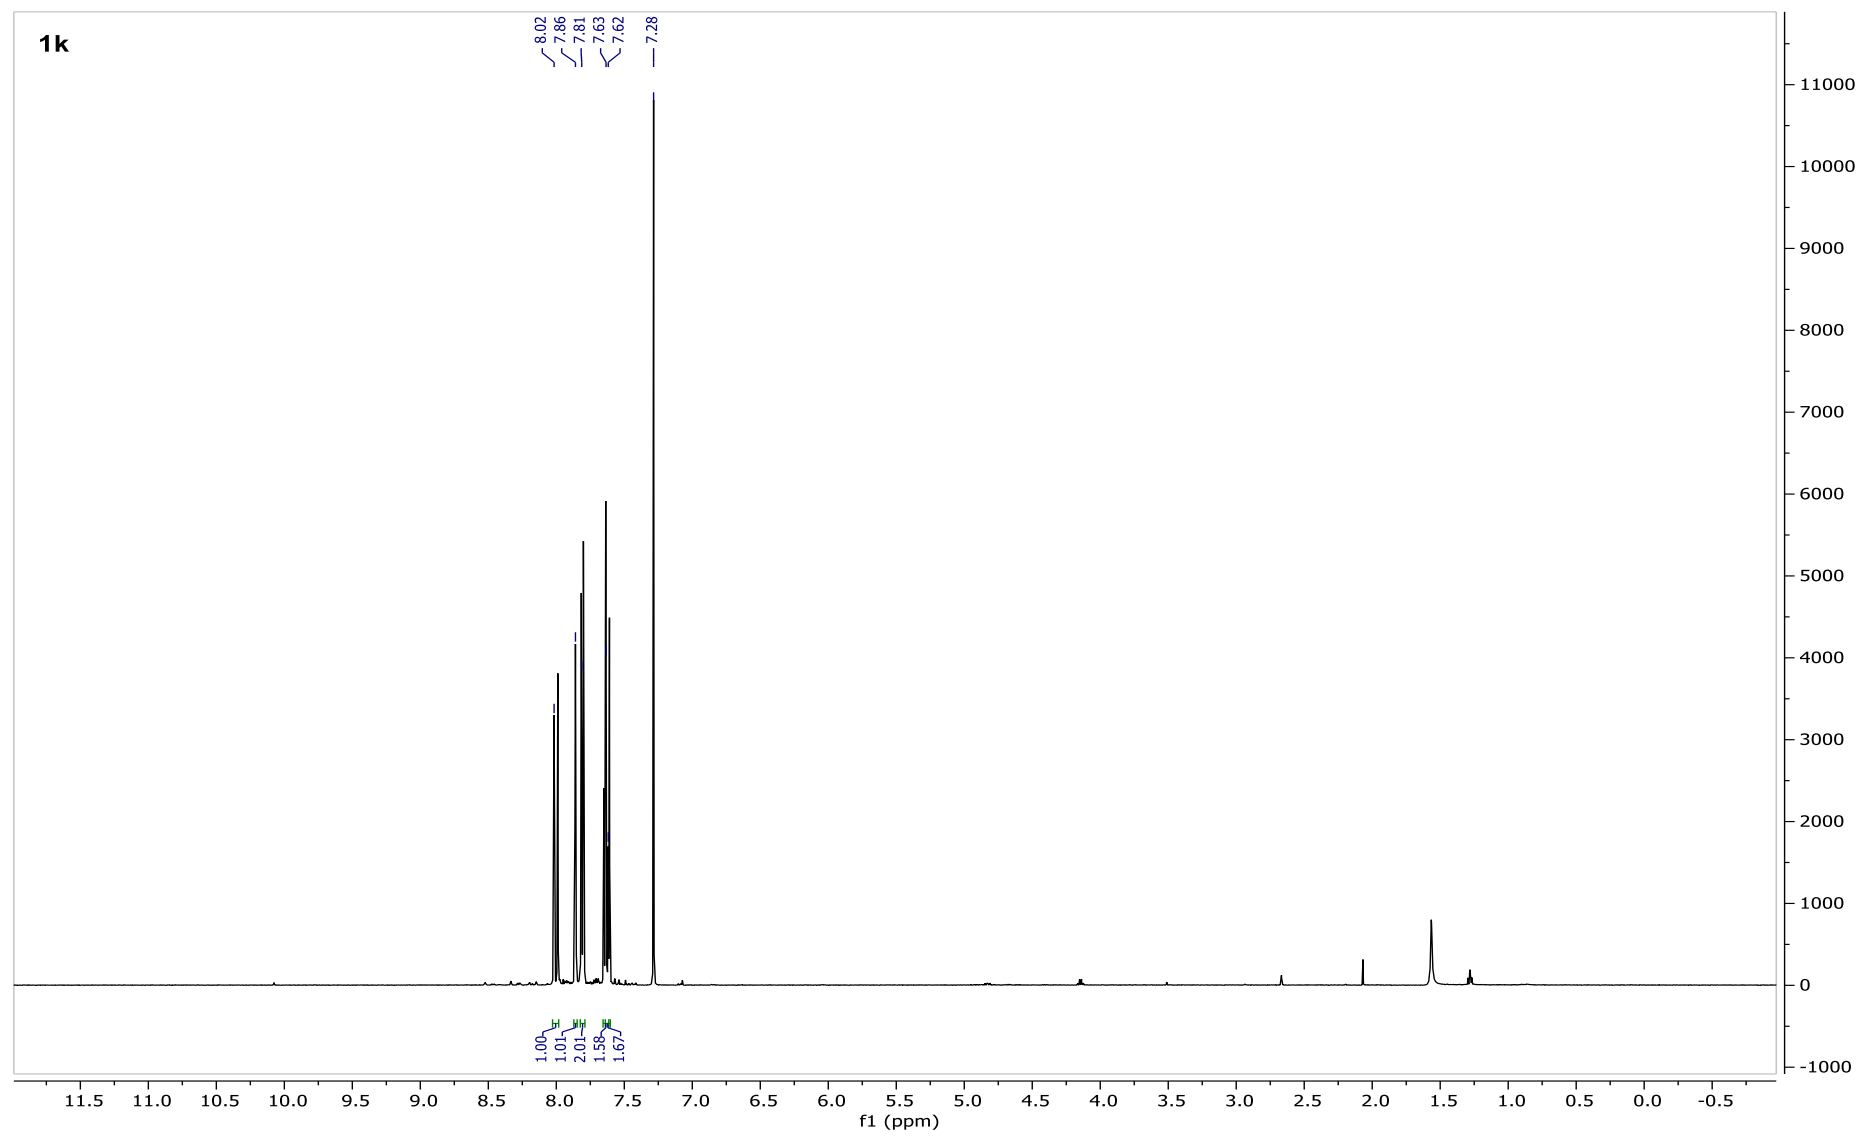

$^{13}\text{C}$  NMR (101 MHz,  $\text{CDCl}_3$ ):

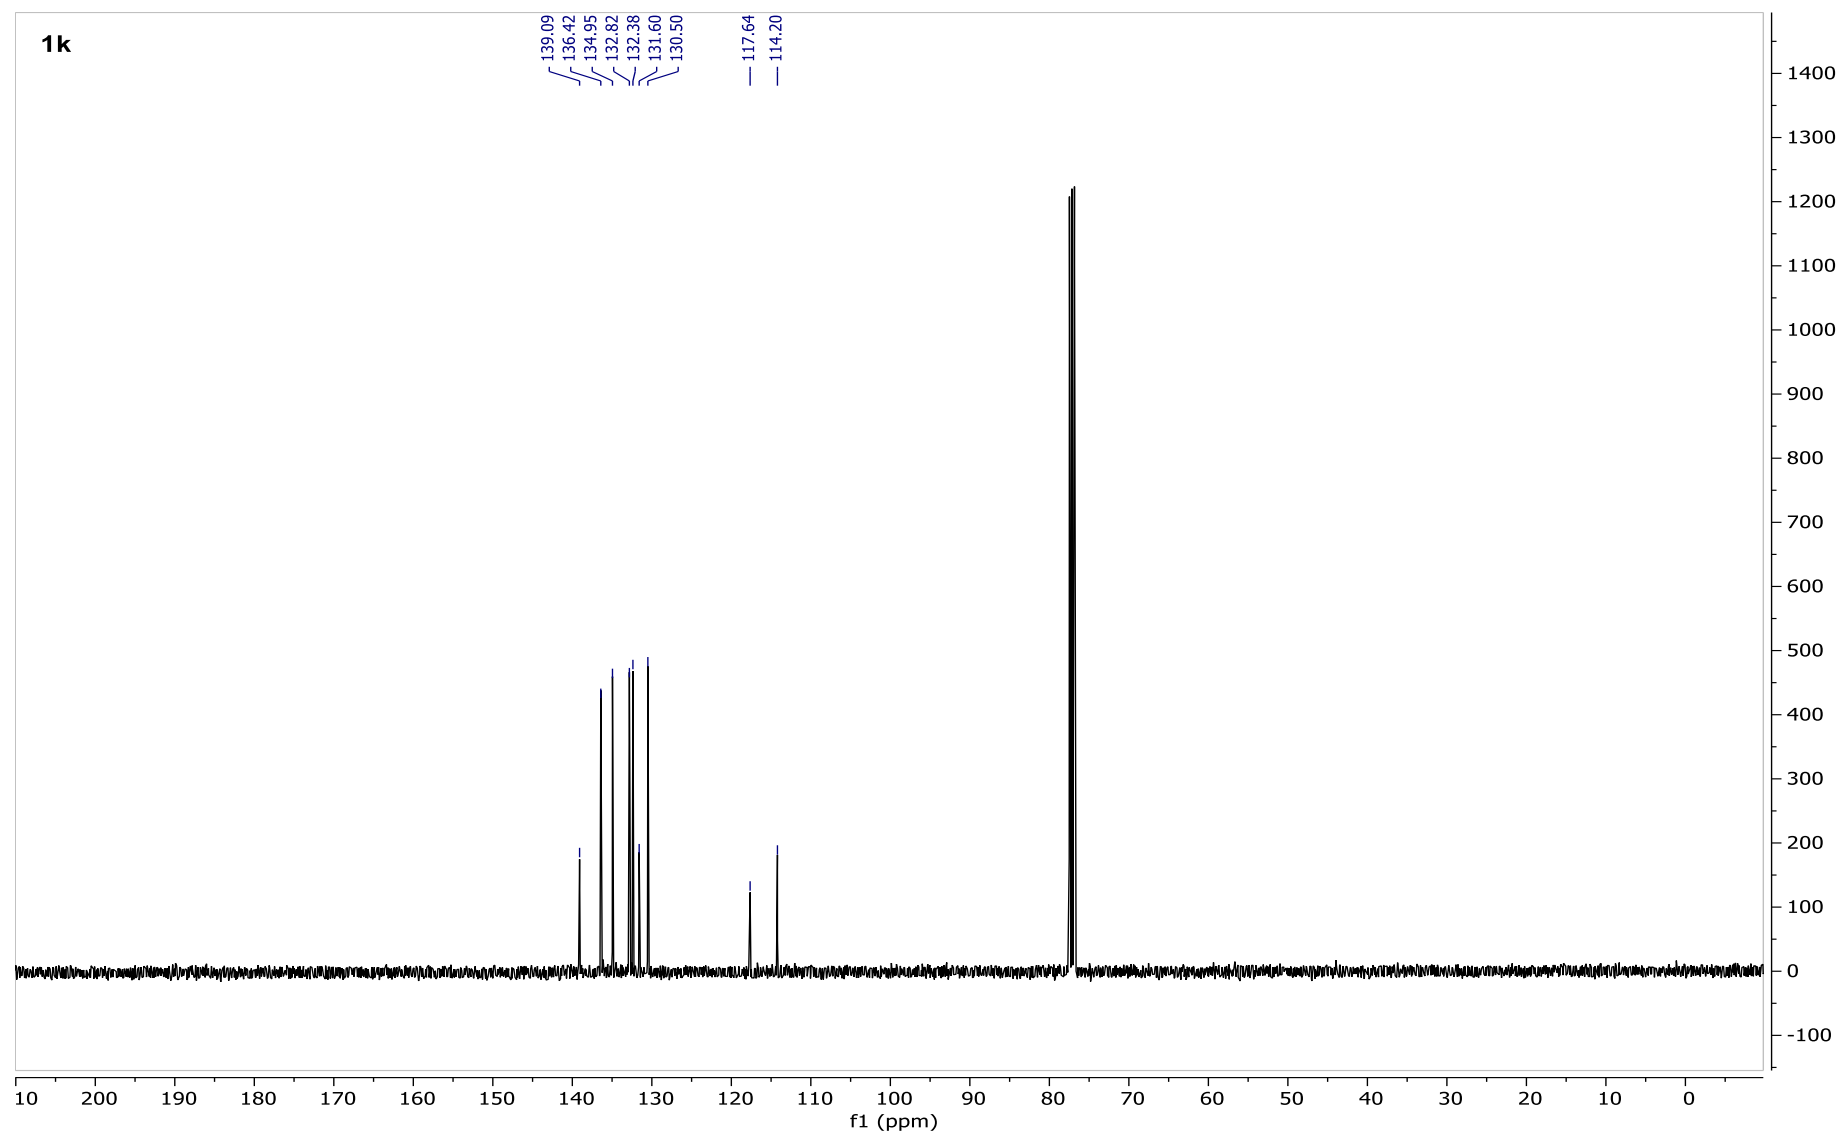

**(E)-1-Chloro-2-(2'-nitrovinyl)benzene (11): <sup>1</sup>H NMR (300 MHz, CDCl<sub>3</sub>):**

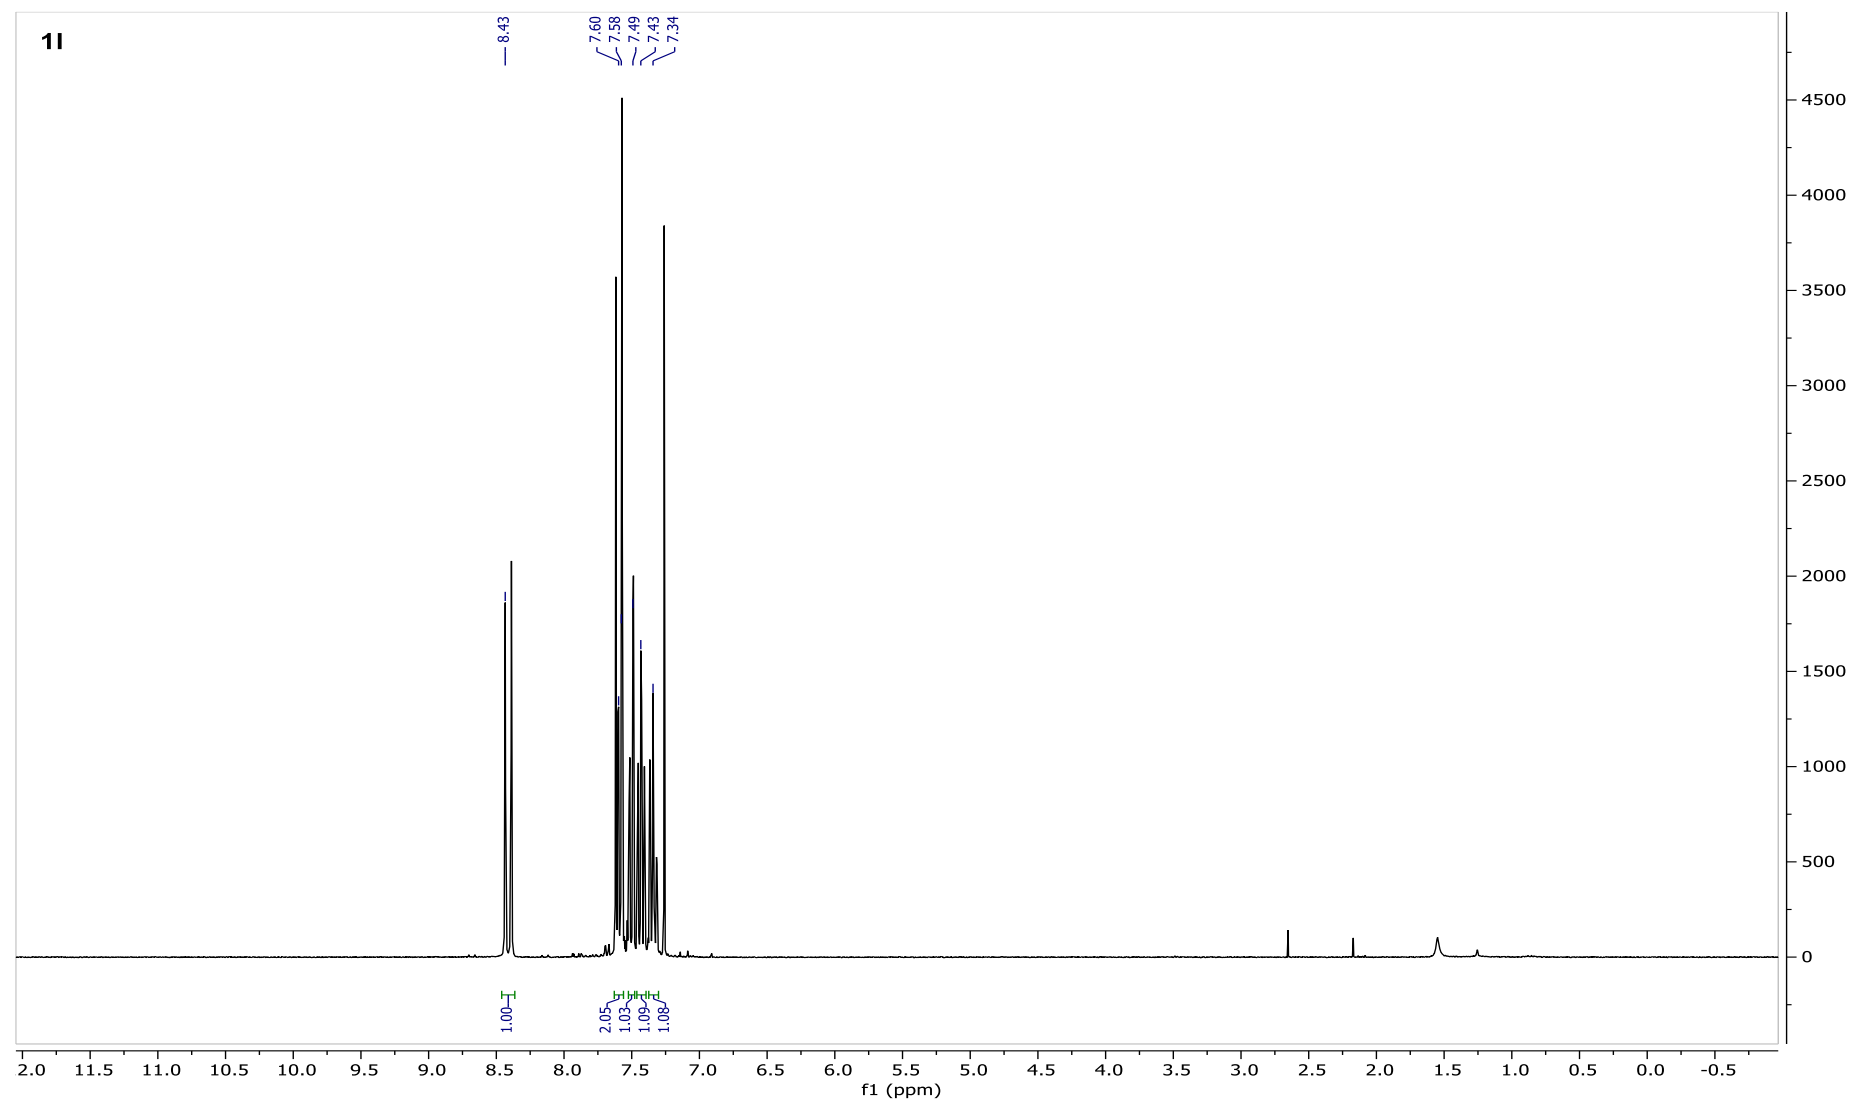



<sup>13</sup>C NMR (101 MHz, CDCl<sub>3</sub>):

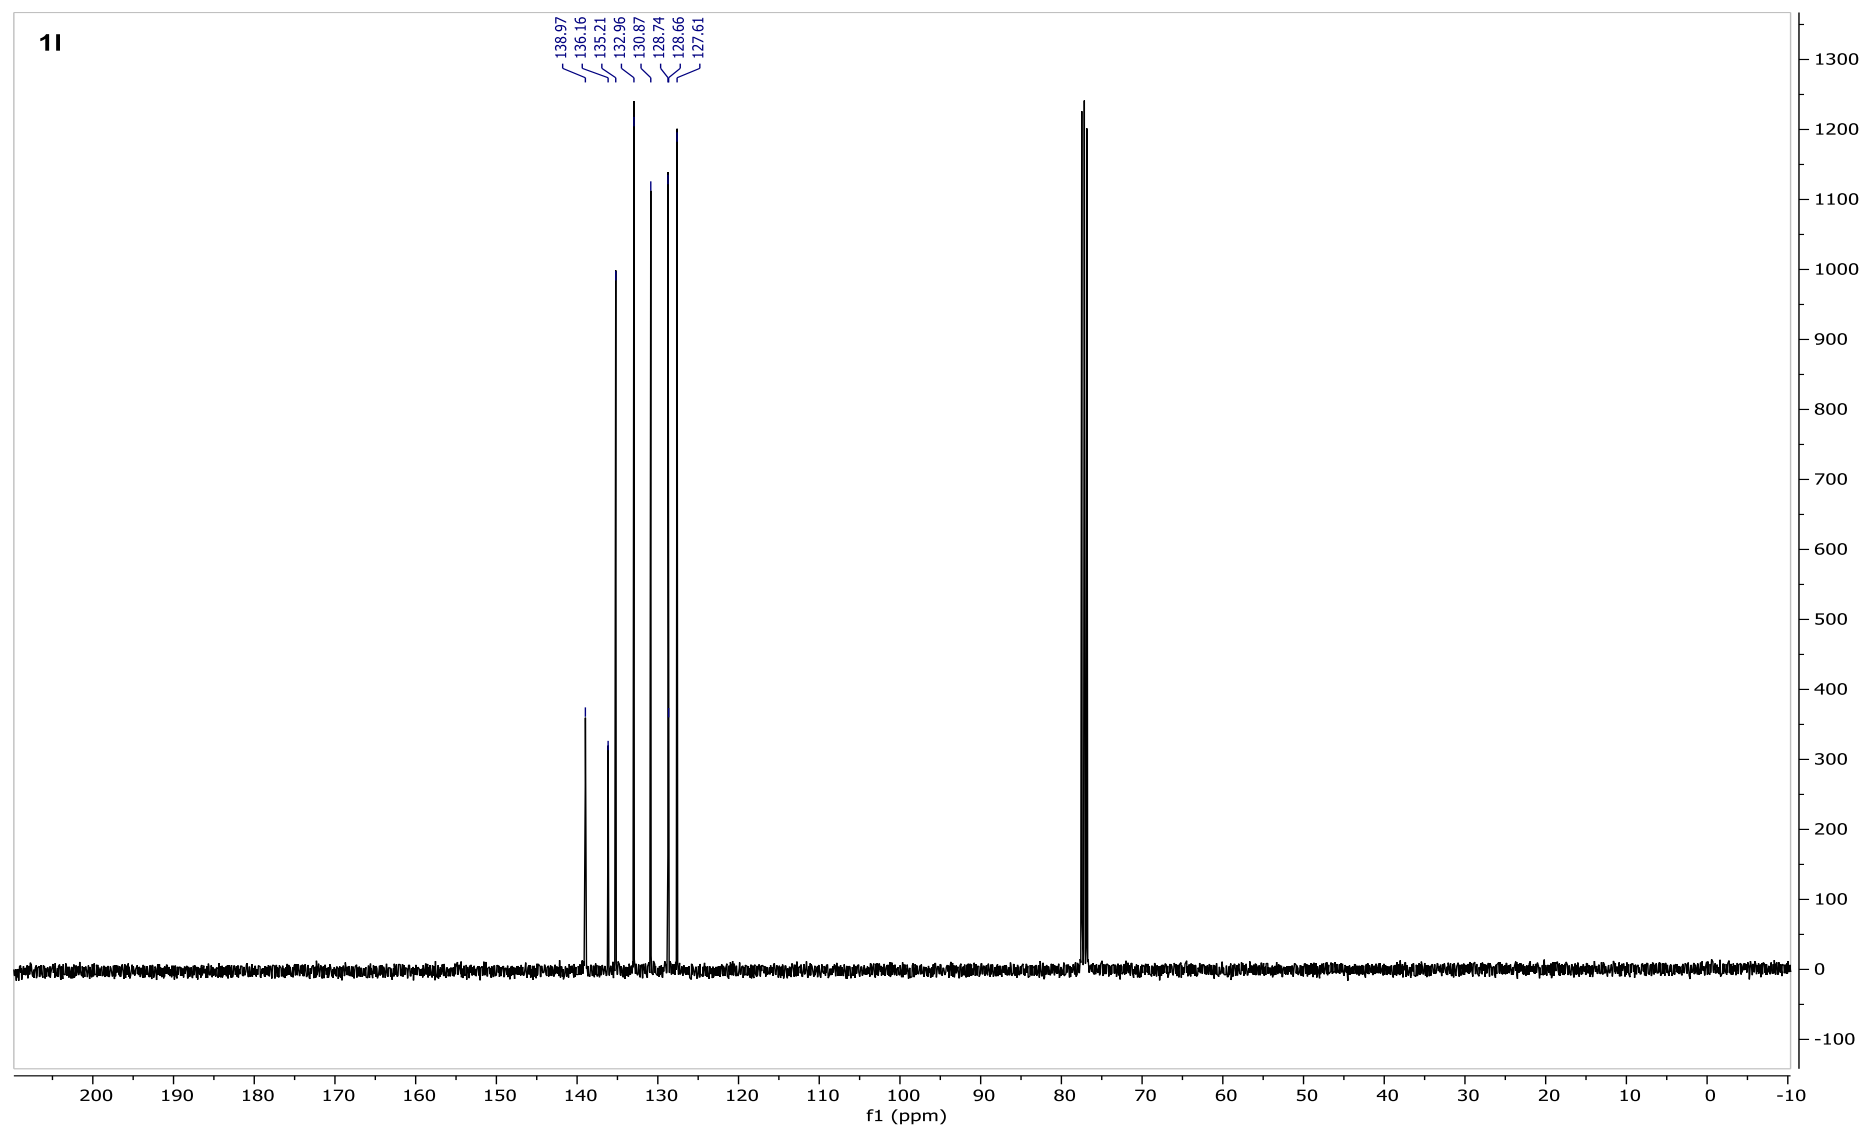

**(E)-2-(2'-Nitrovinyl)pyridine (1m): <sup>1</sup>H NMR (500 MHz, CDCl<sub>3</sub>):**

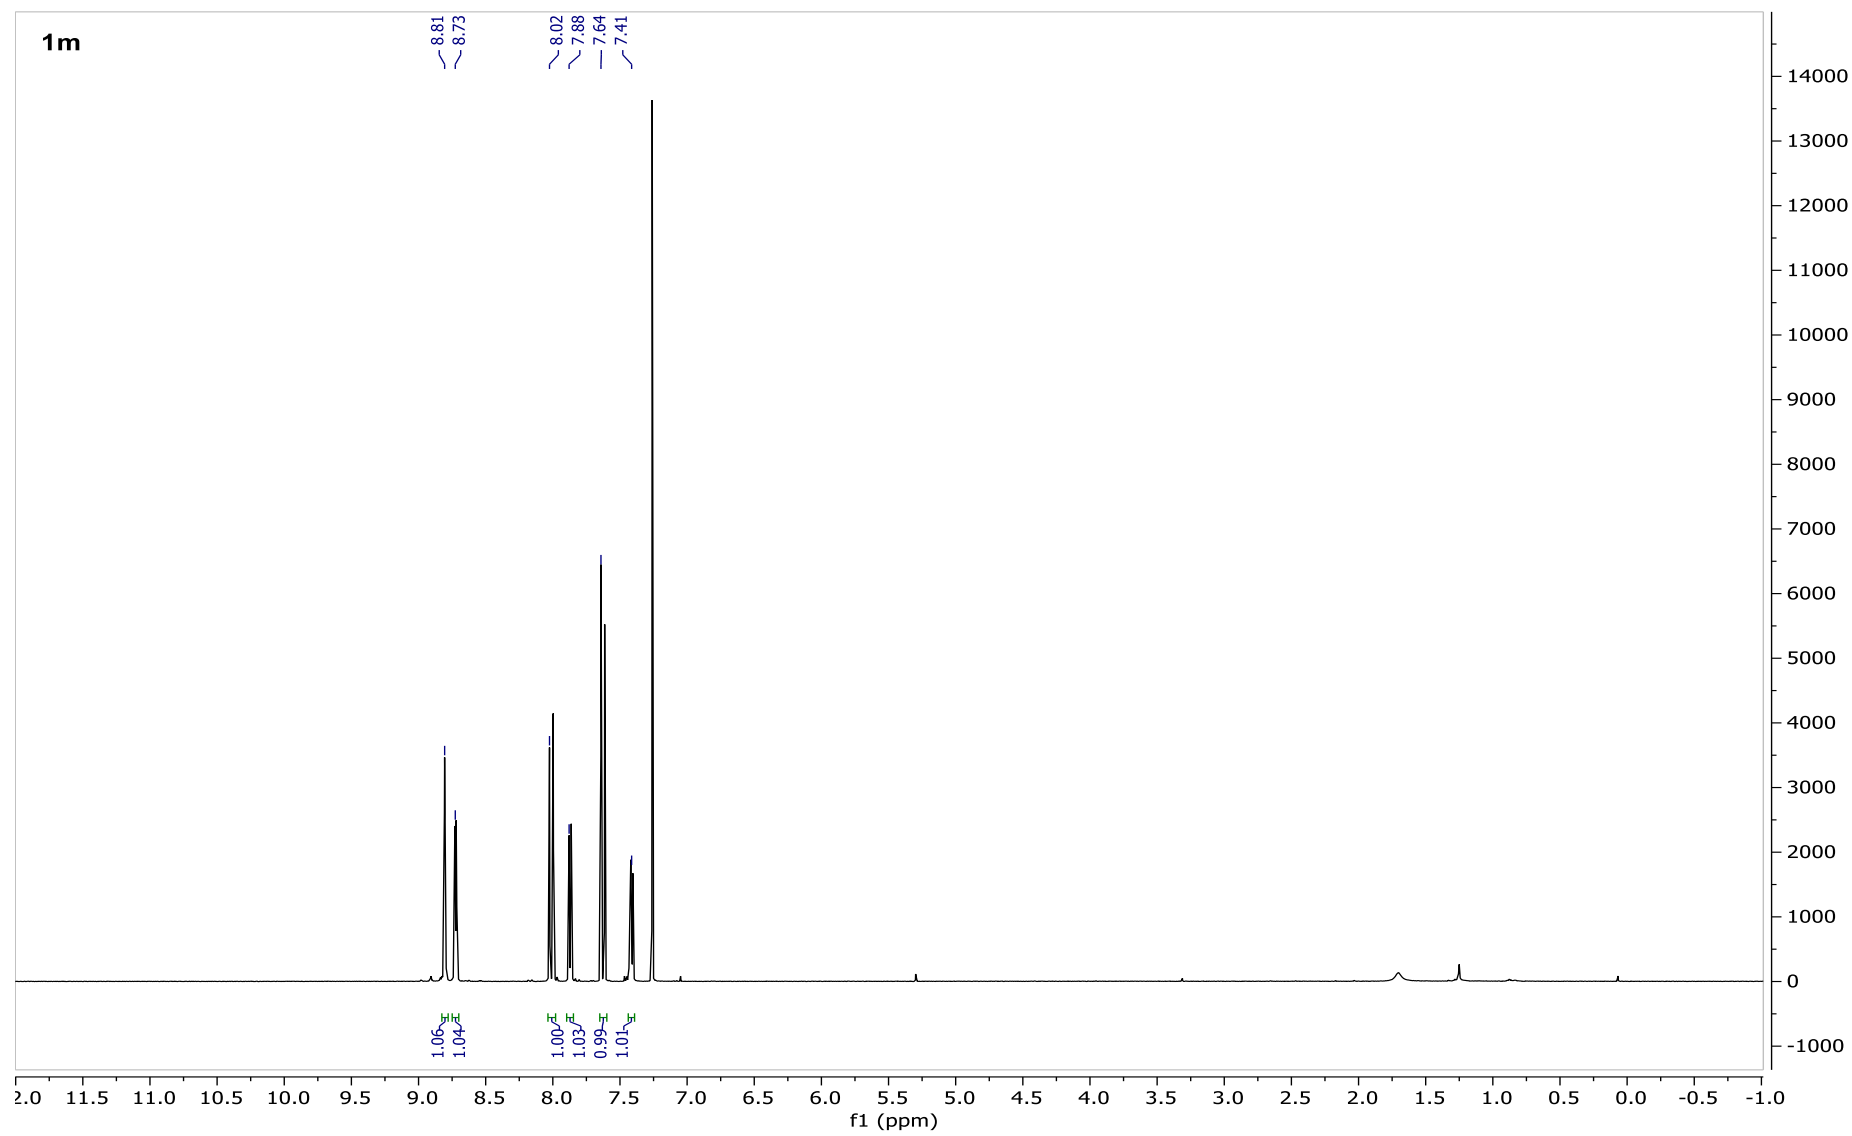

$^{13}\text{C}$  NMR (75 MHz,  $\text{CDCl}_3$ ):

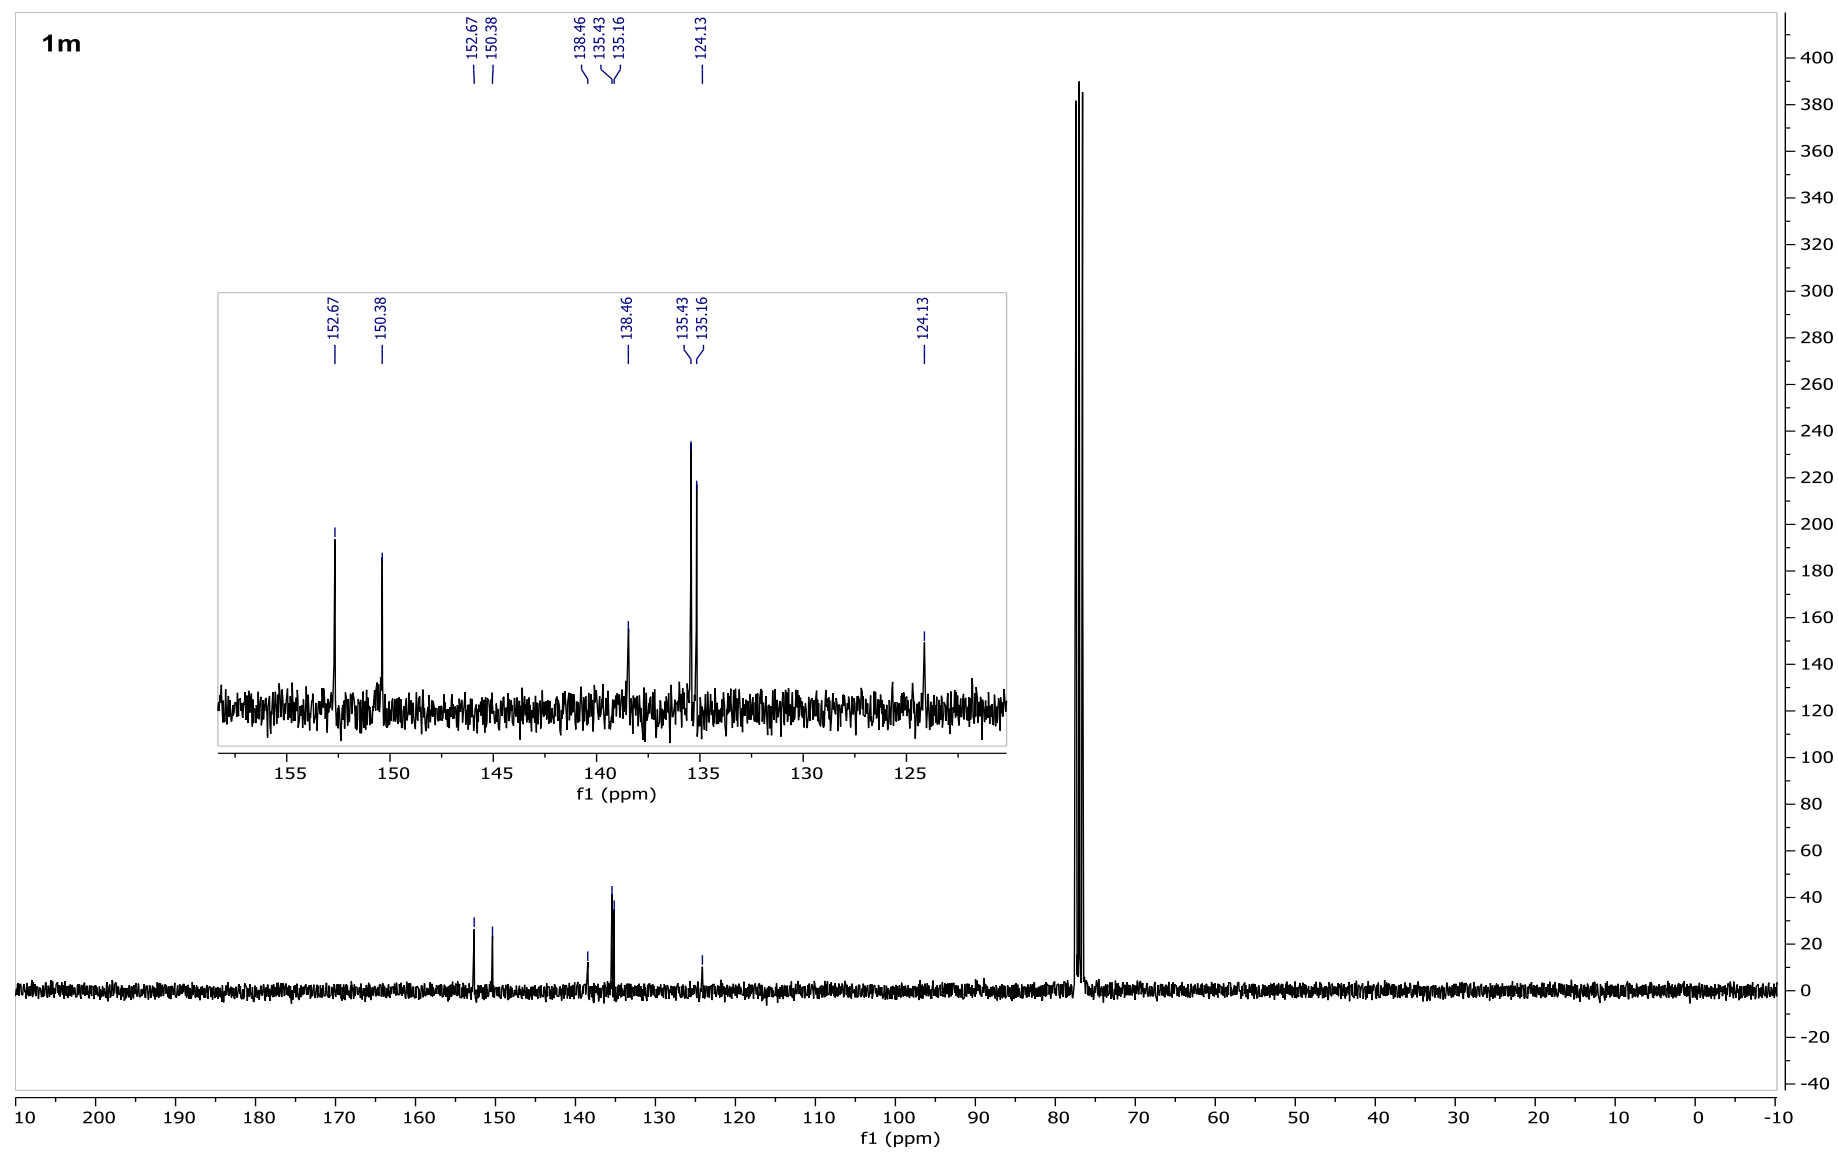

**(E)-2-(2'-Nitrovinyl)naphthalene (1n): <sup>1</sup>H NMR (500 MHz, CDCl<sub>3</sub>):**

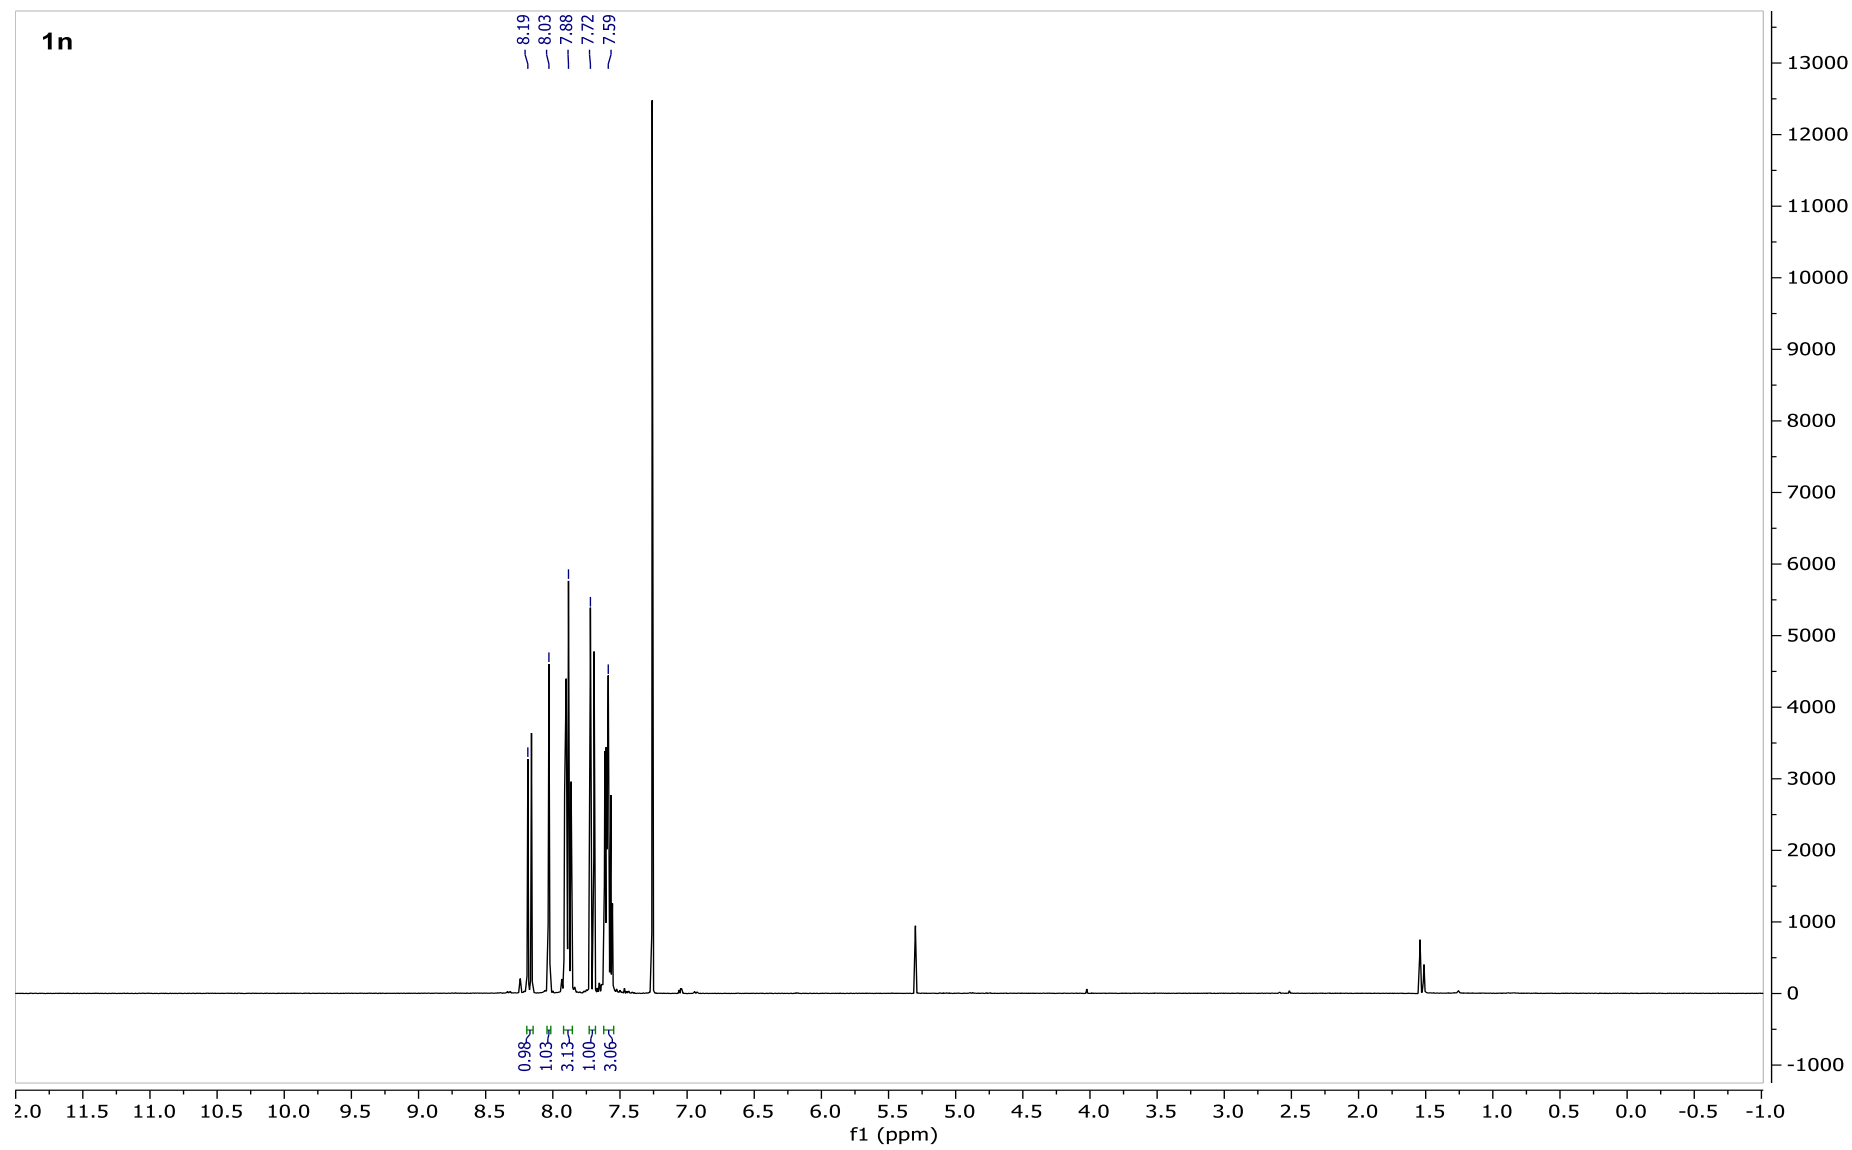

<sup>13</sup>C NMR (101 MHz, CDCl<sub>3</sub>):

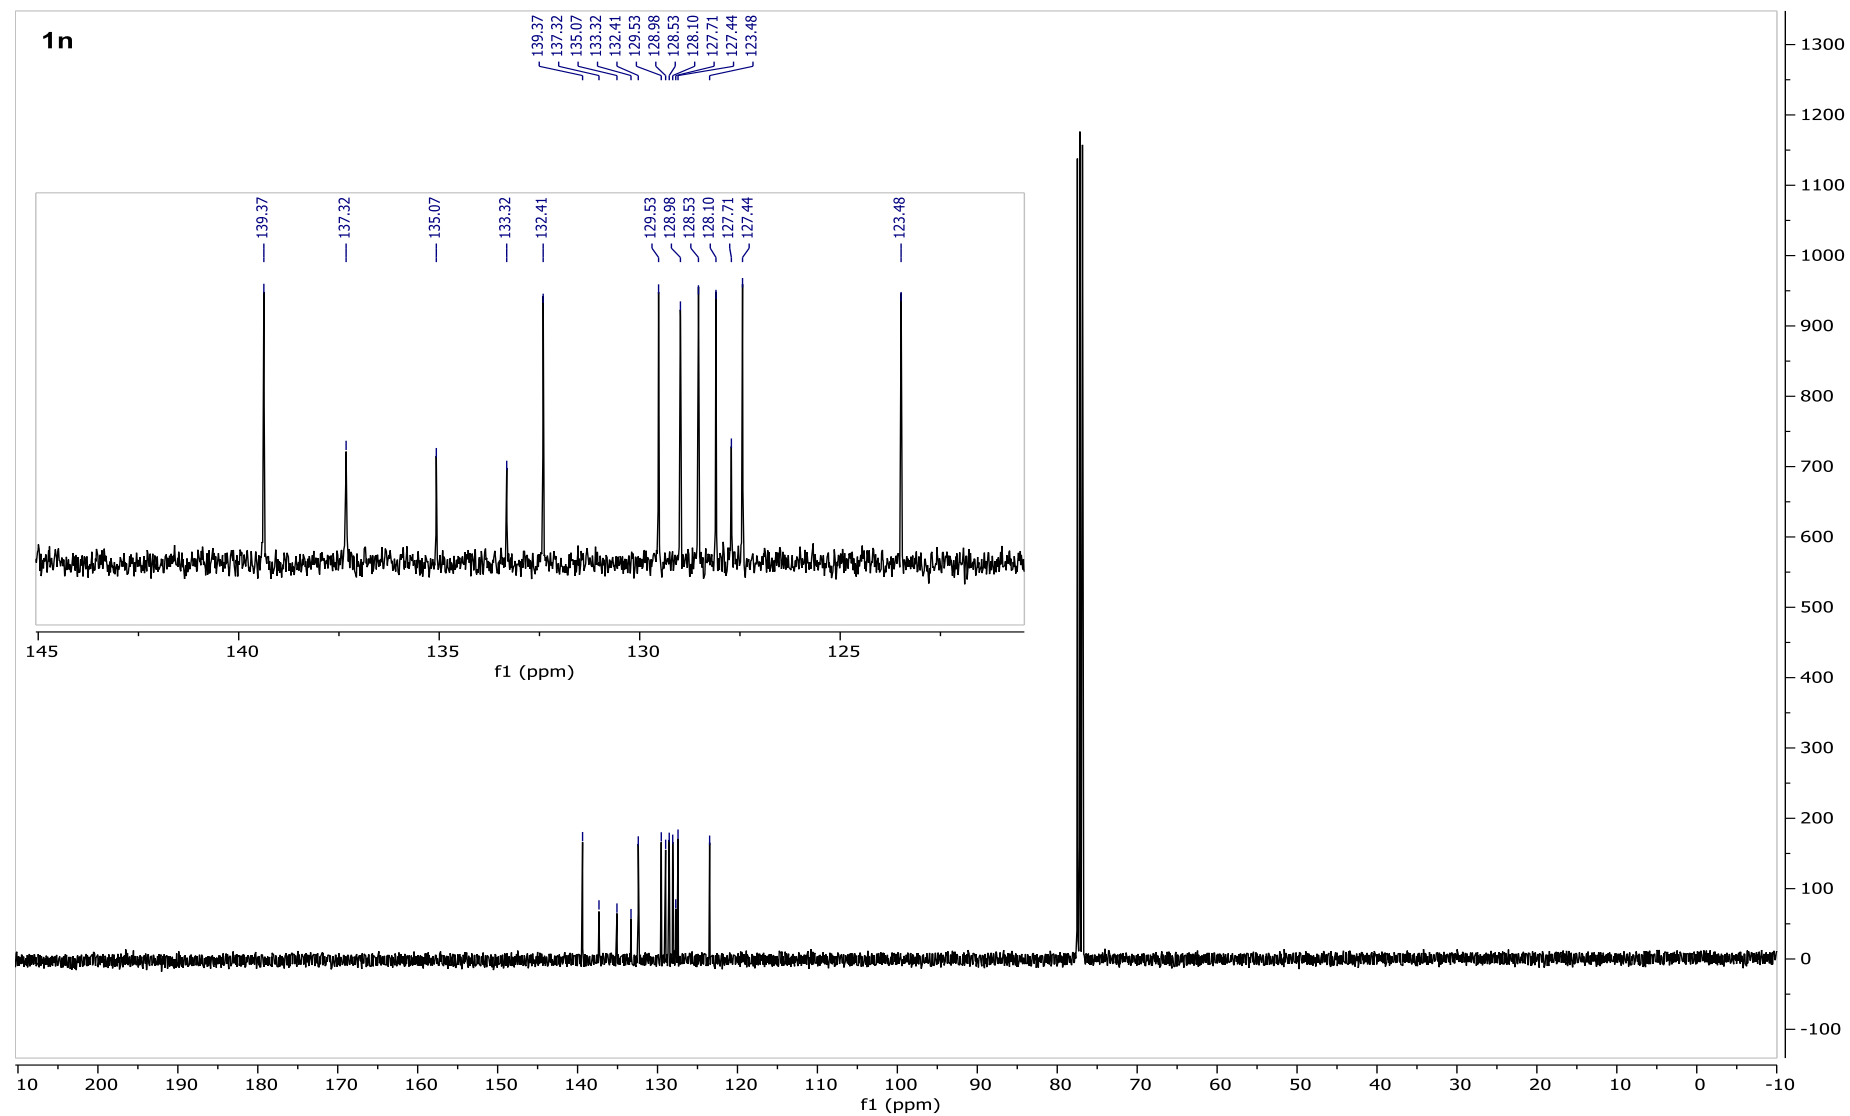

*(E)*-1-(2'-Nitrovinyl)benzene-2,3,4,5,6-*d*<sub>5</sub> (**1a-d**<sub>5</sub>): <sup>1</sup>H NMR (300 MHz, CDCl<sub>3</sub>):

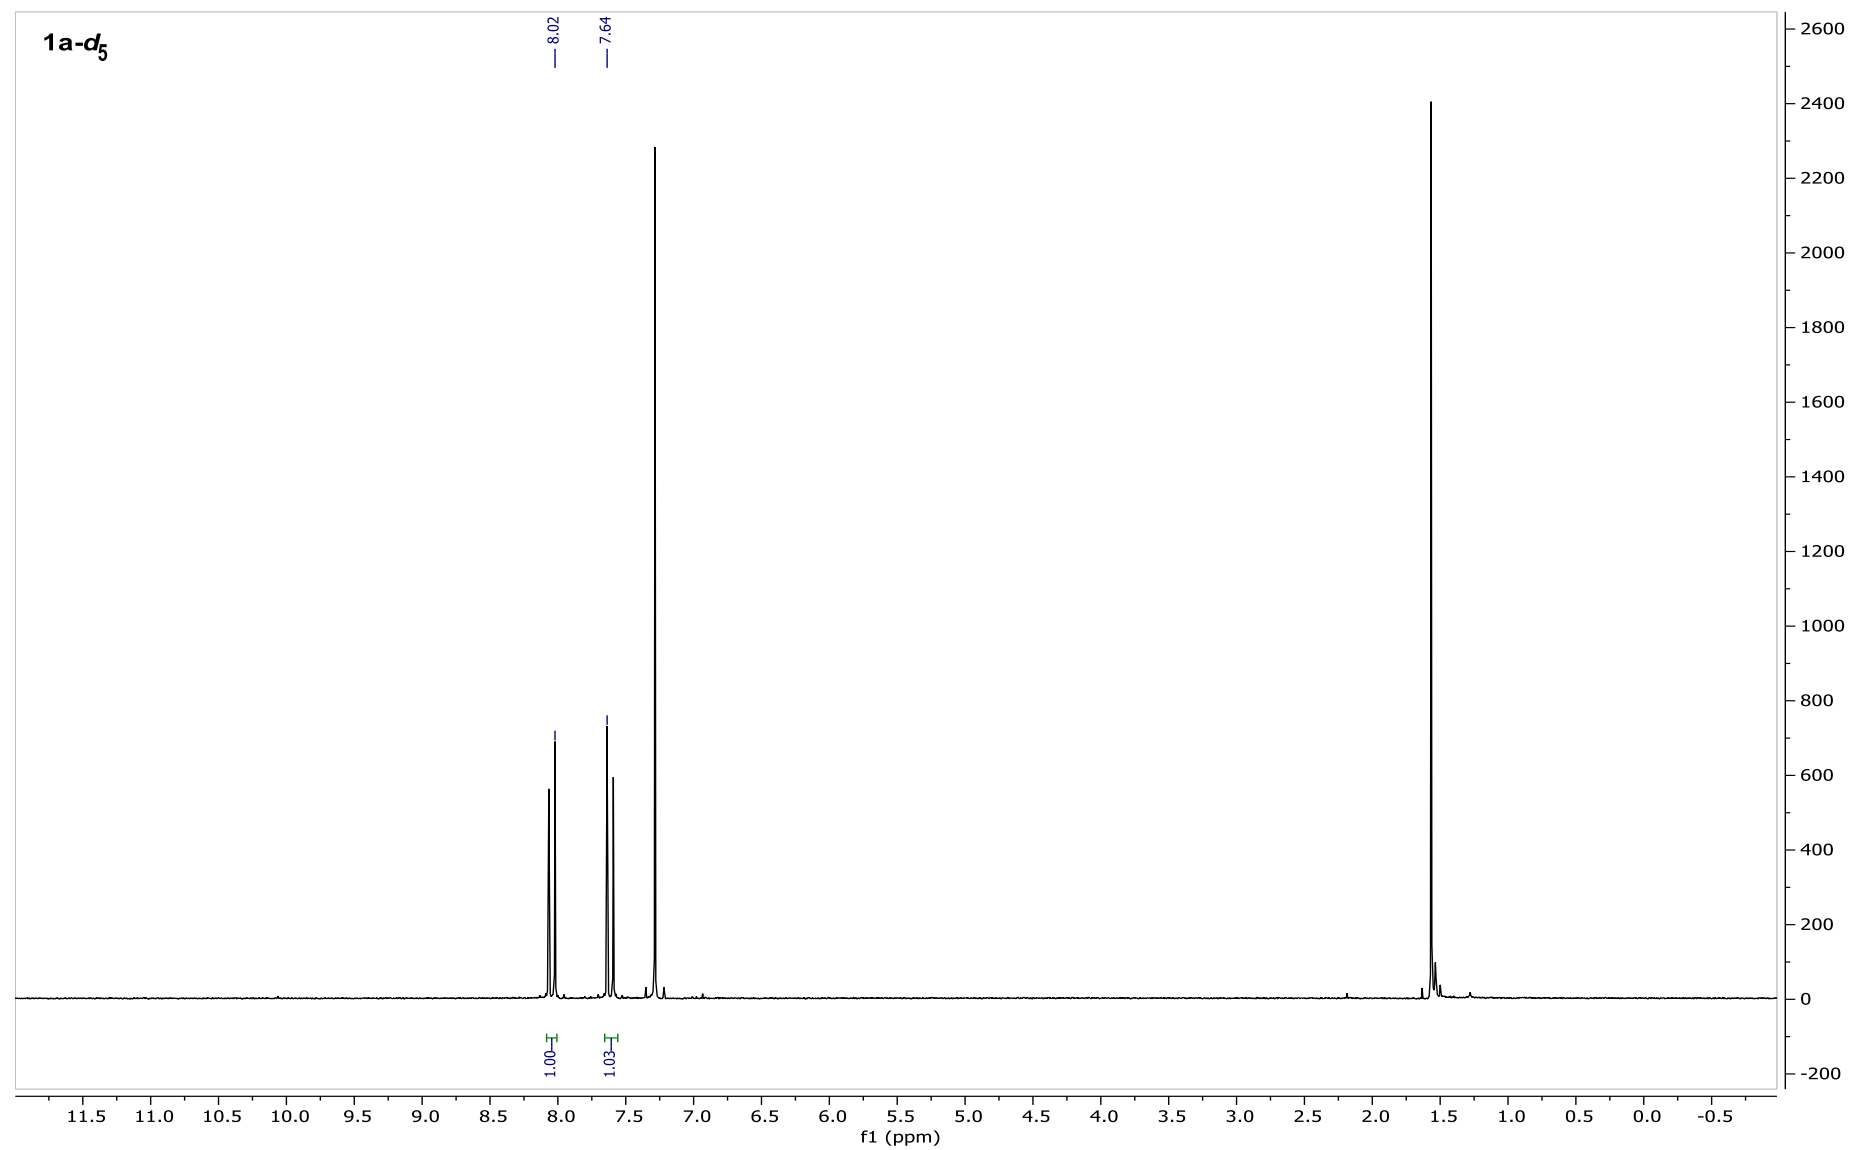

$^{13}\text{C}$  NMR (101 MHz,  $\text{CDCl}_3$ ):

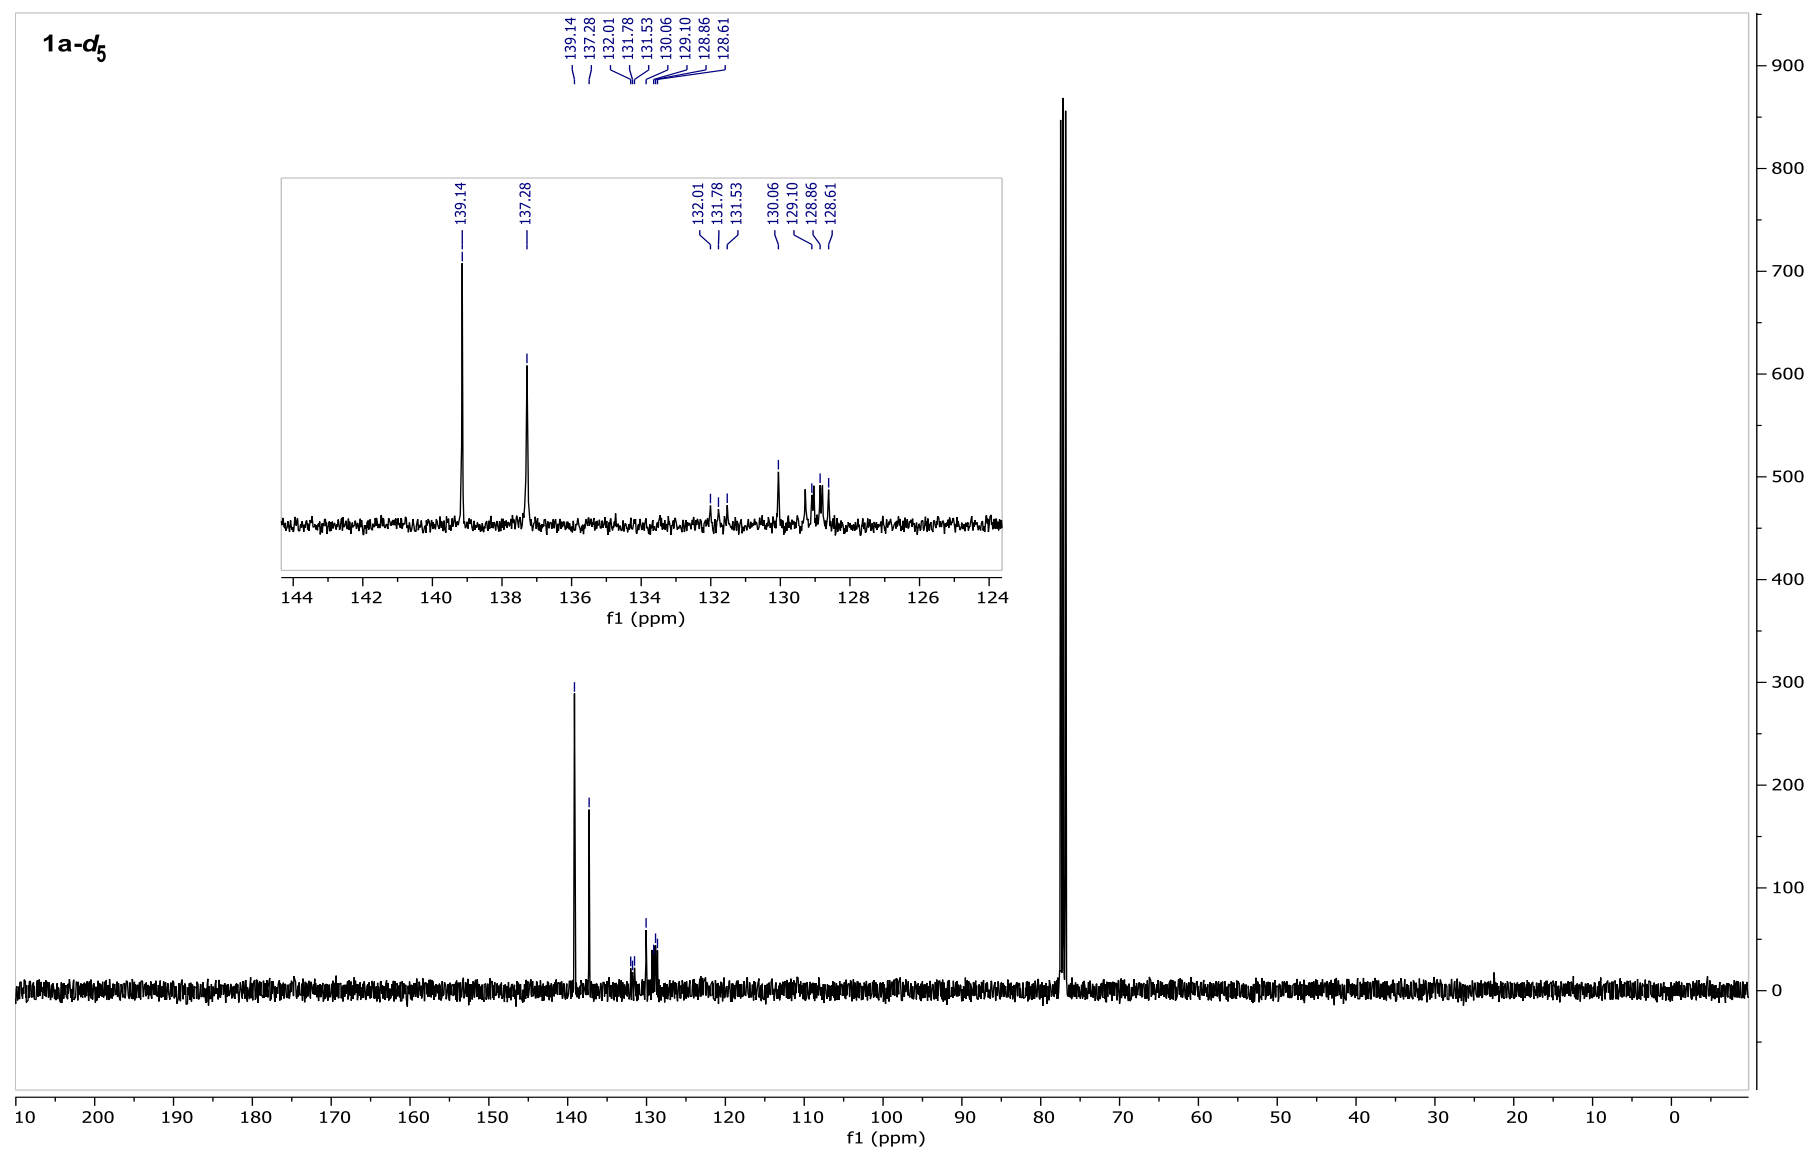

*(E)*-1-(2'-Nitrovinyl)-2-(pent-4'-en-1'-yl)benzene (**1o**):  $^1\text{H}$  NMR (300 MHz,  $\text{CDCl}_3$ ):

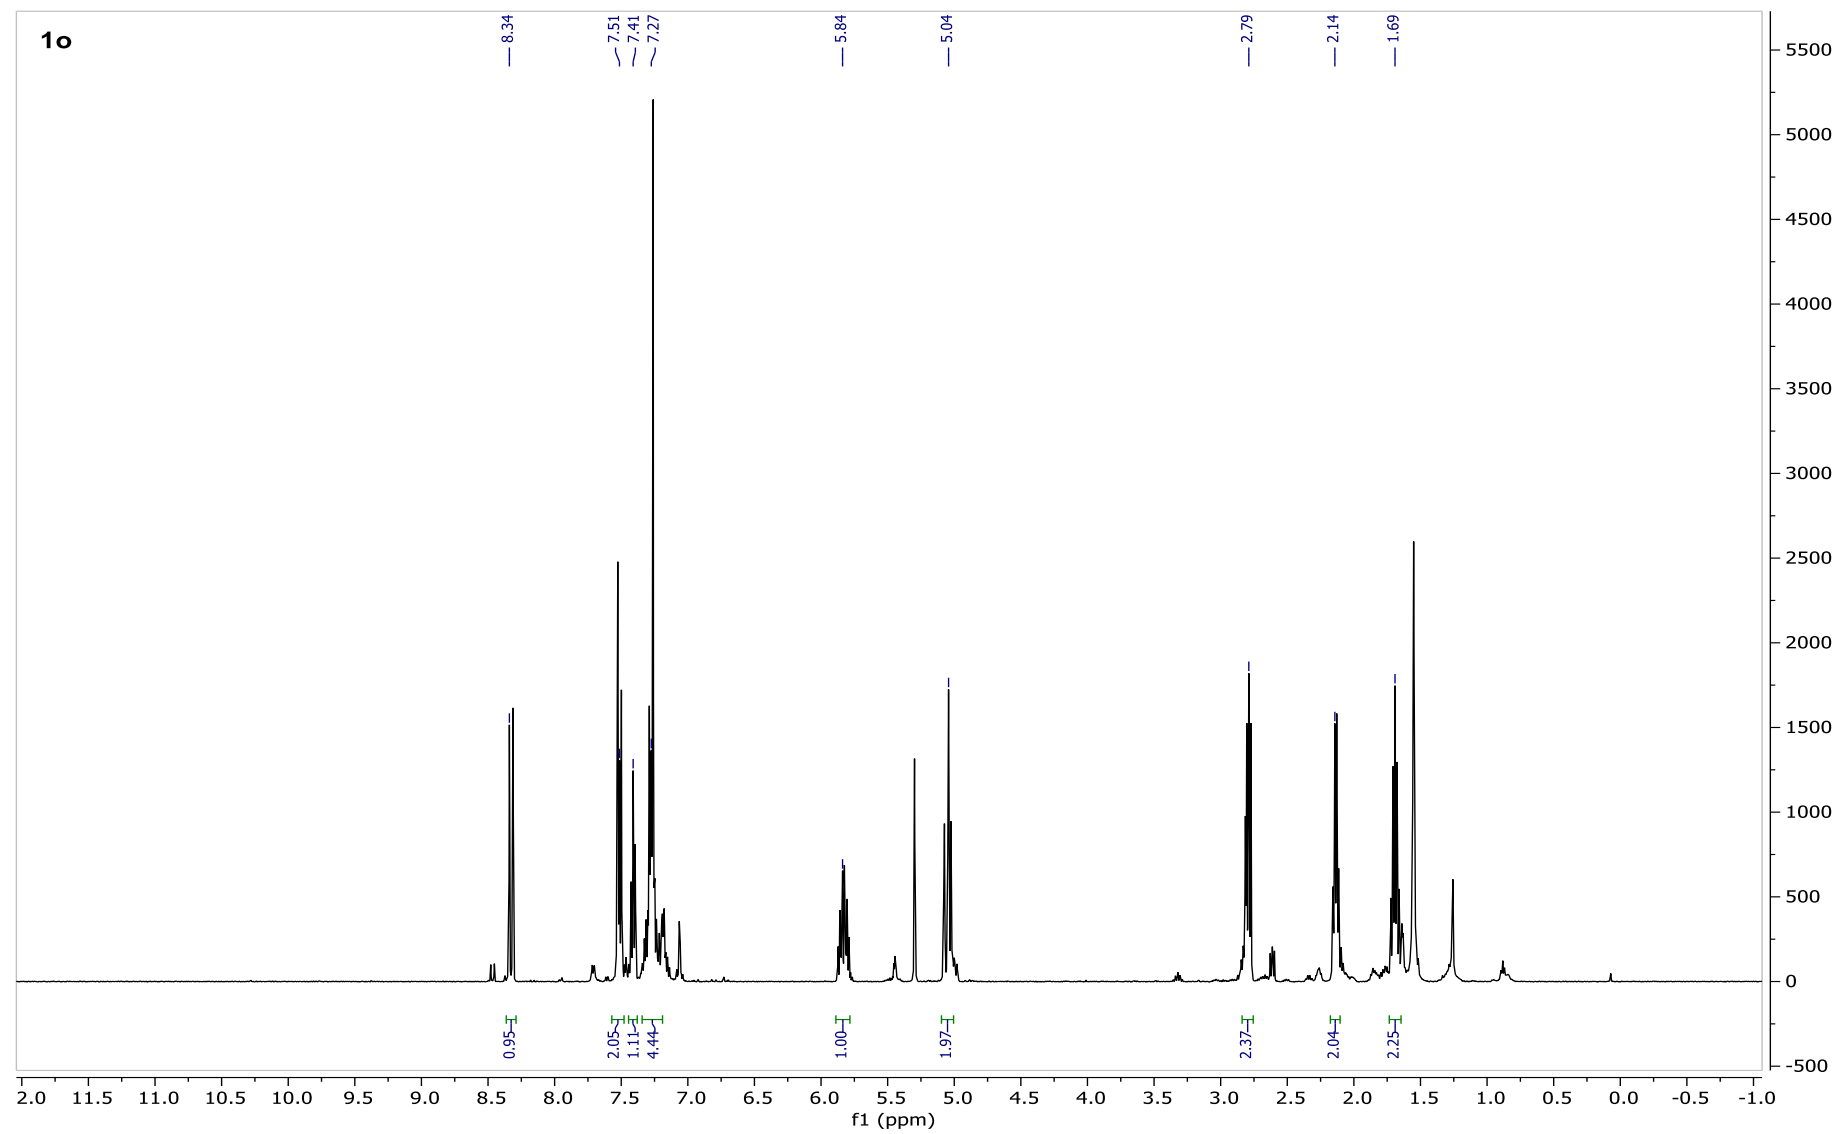



$^{13}\text{C}$  NMR (75\* MHz,  $\text{CDCl}_3$ ):

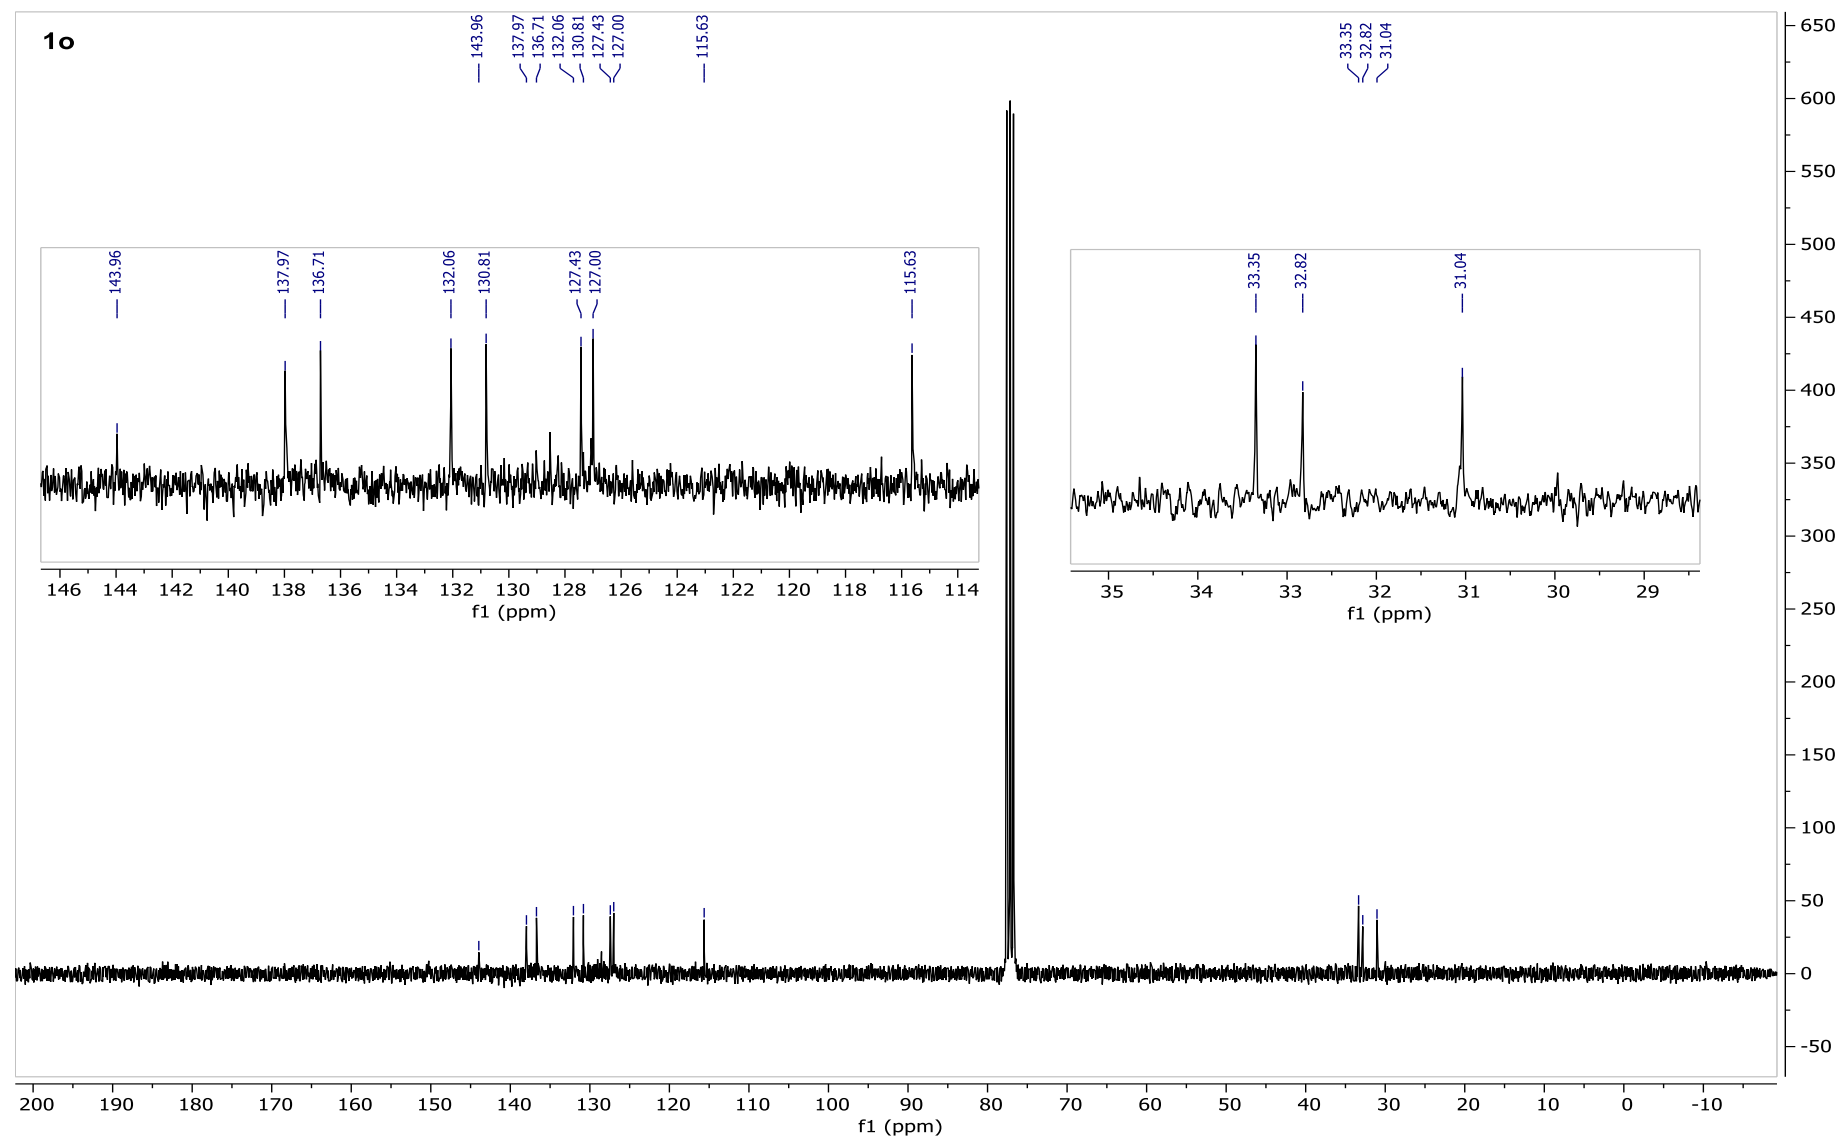

**1-Fluoro-4-(2',2',3',3'-tetramethyl-4'-nitrocyclobutyl)benzene (2f): <sup>1</sup>H NMR (400 MHz, CDCl<sub>3</sub>):**

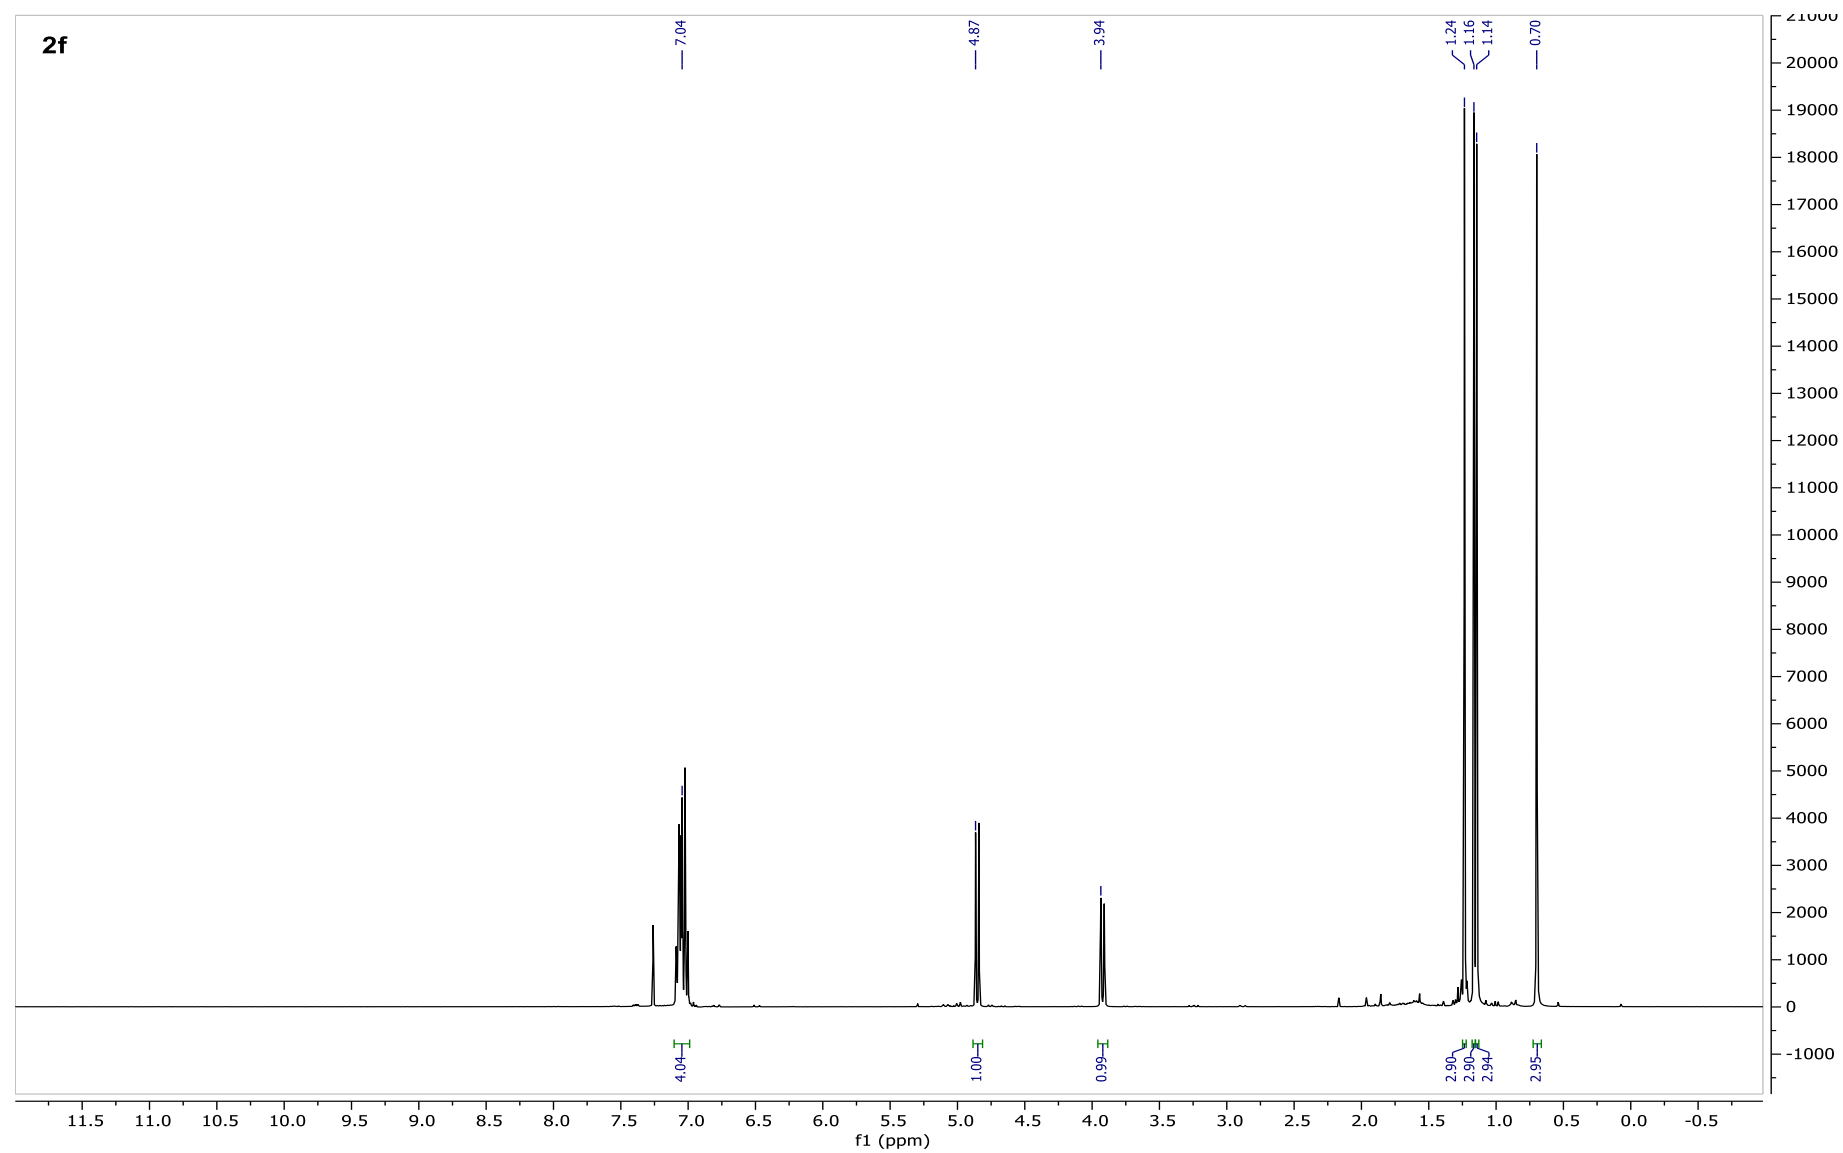

$^{13}\text{C}$  NMR (101 MHz,  $\text{CDCl}_3$ ):

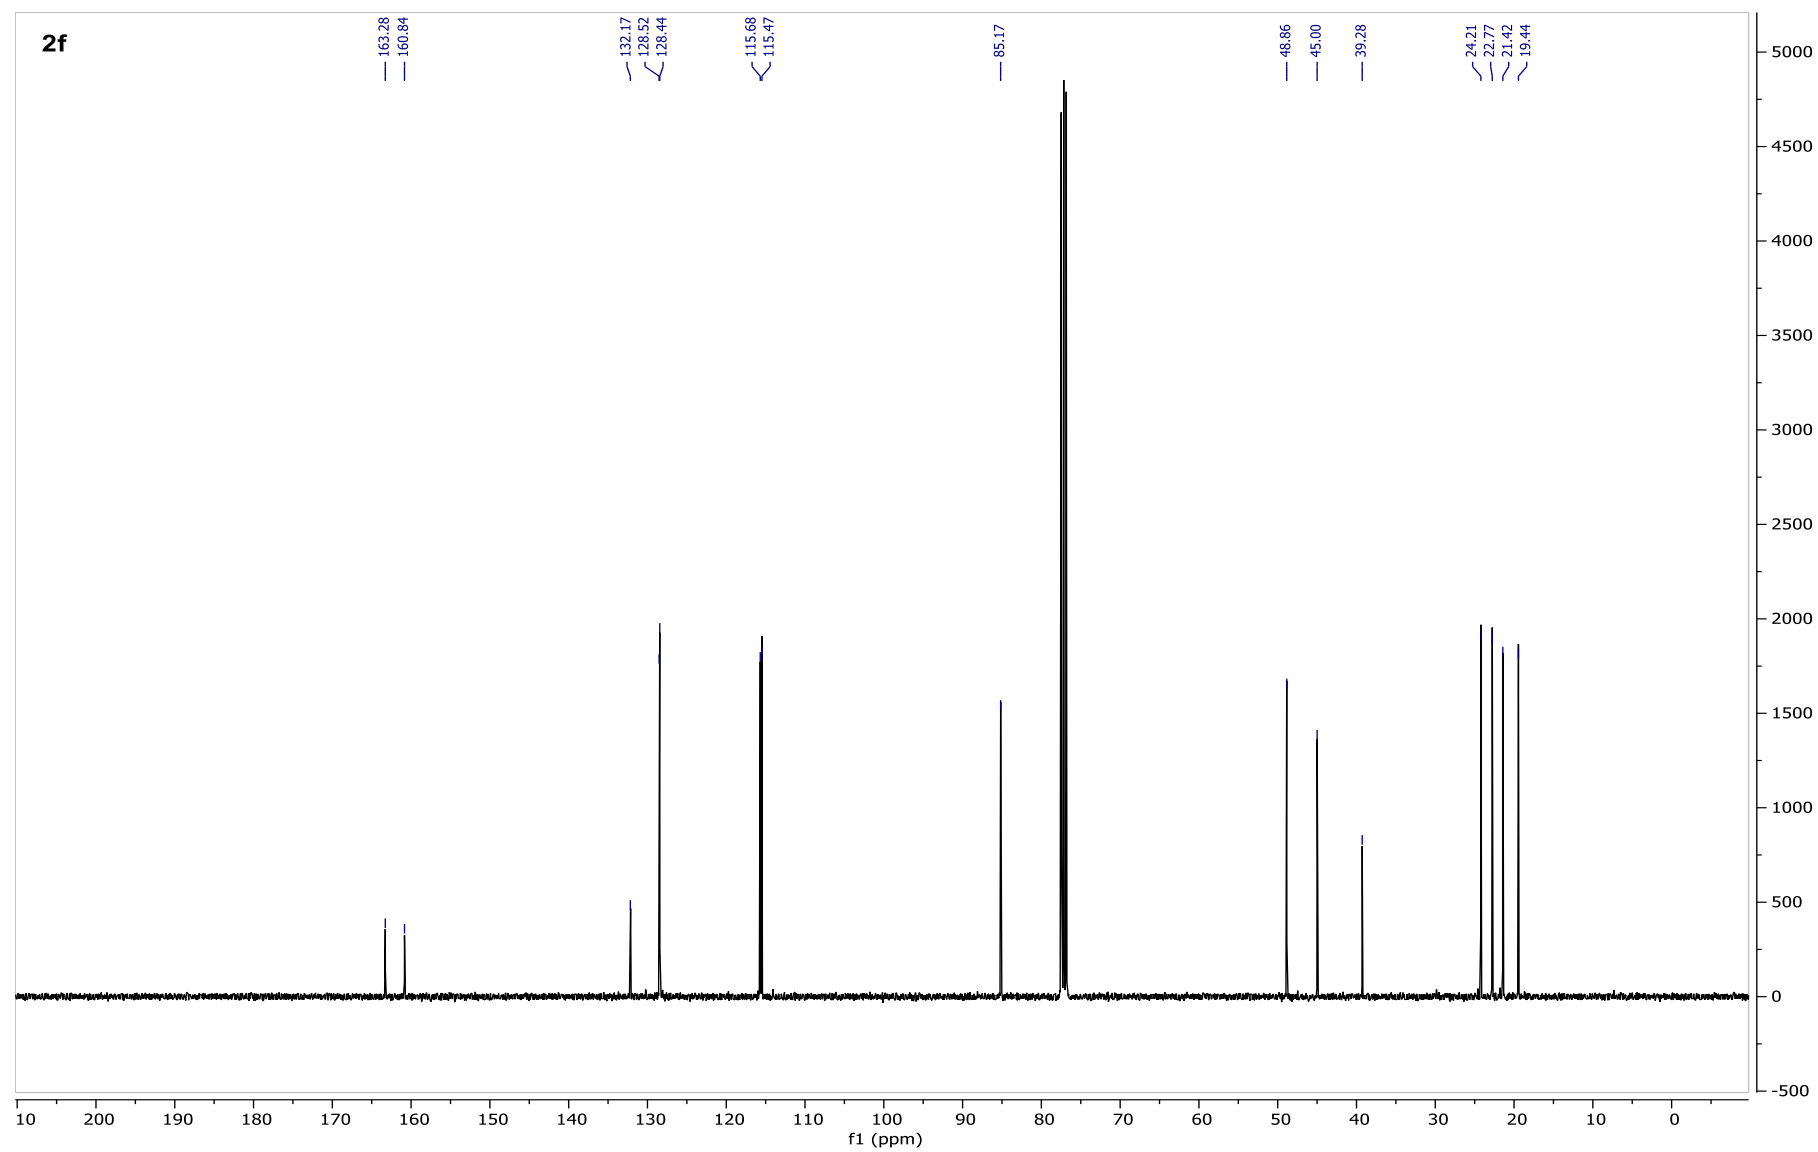

**1-Chloro-4-(2',2',3',3'-tetramethyl-4'-nitrocyclobutyl)benzene (2g):  $^1\text{H}$  NMR (400 MHz,  $\text{CDCl}_3$ ):**

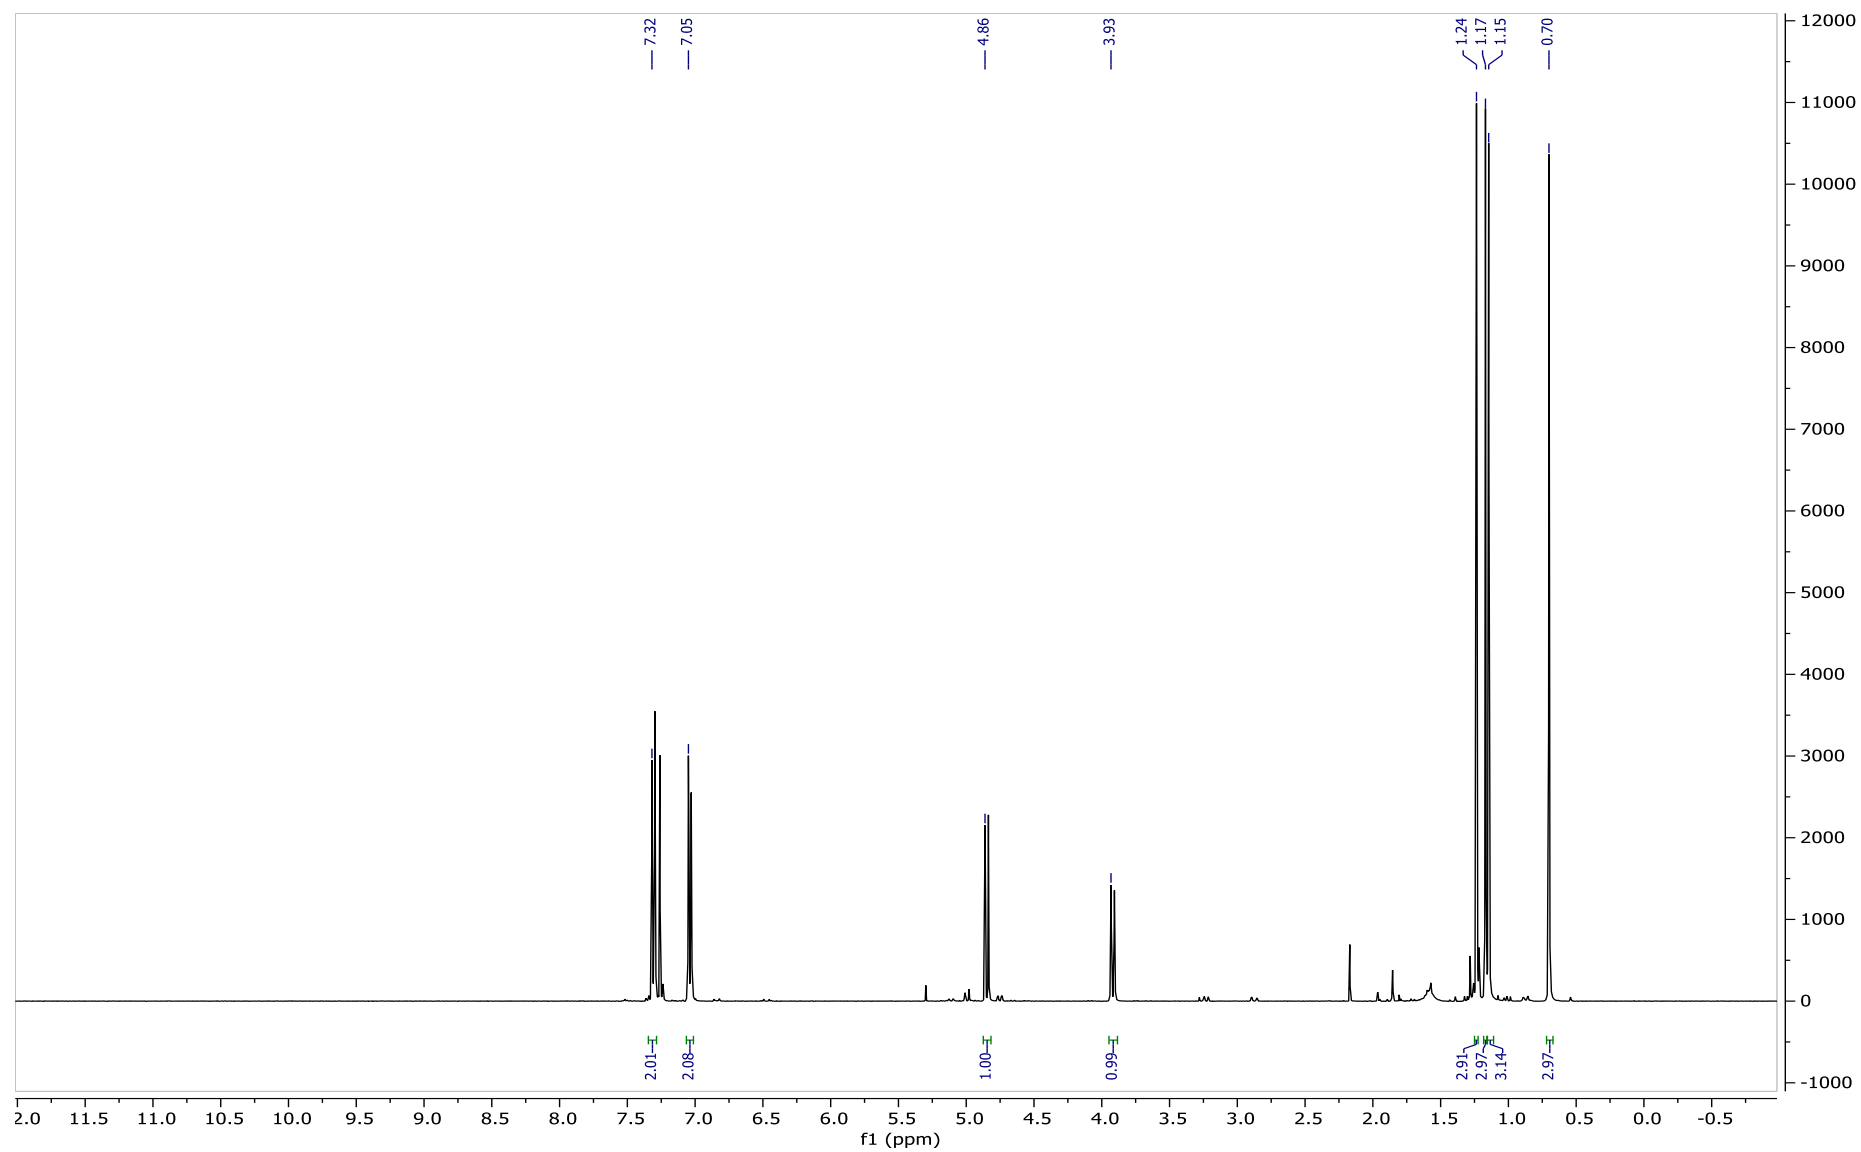

$^{13}\text{C}$  NMR (101 MHz,  $\text{CDCl}_3$ ):

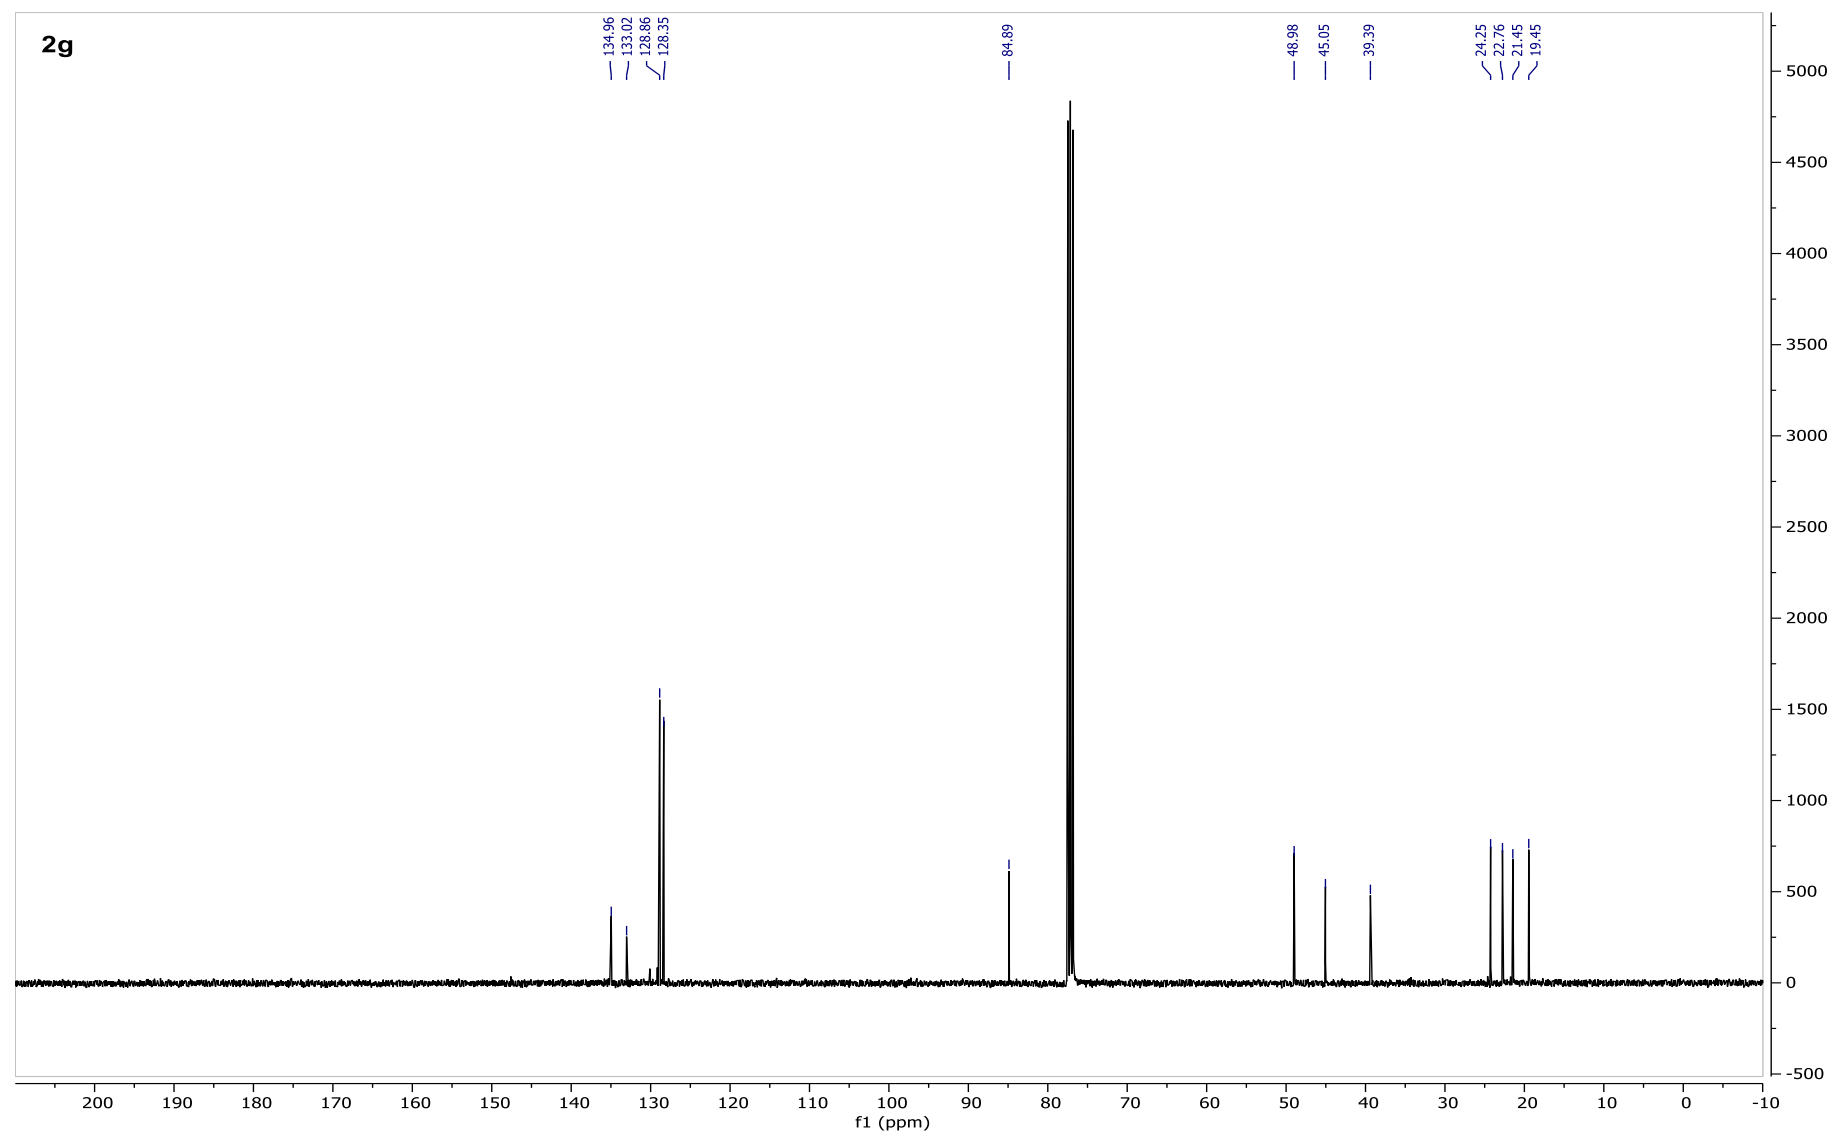

**1-Bromo-4-(2',2',3',3'-tetramethyl-4'-nitrocyclobutyl)benzene (2h): <sup>1</sup>H NMR (500 MHz, CDCl<sub>3</sub>):**

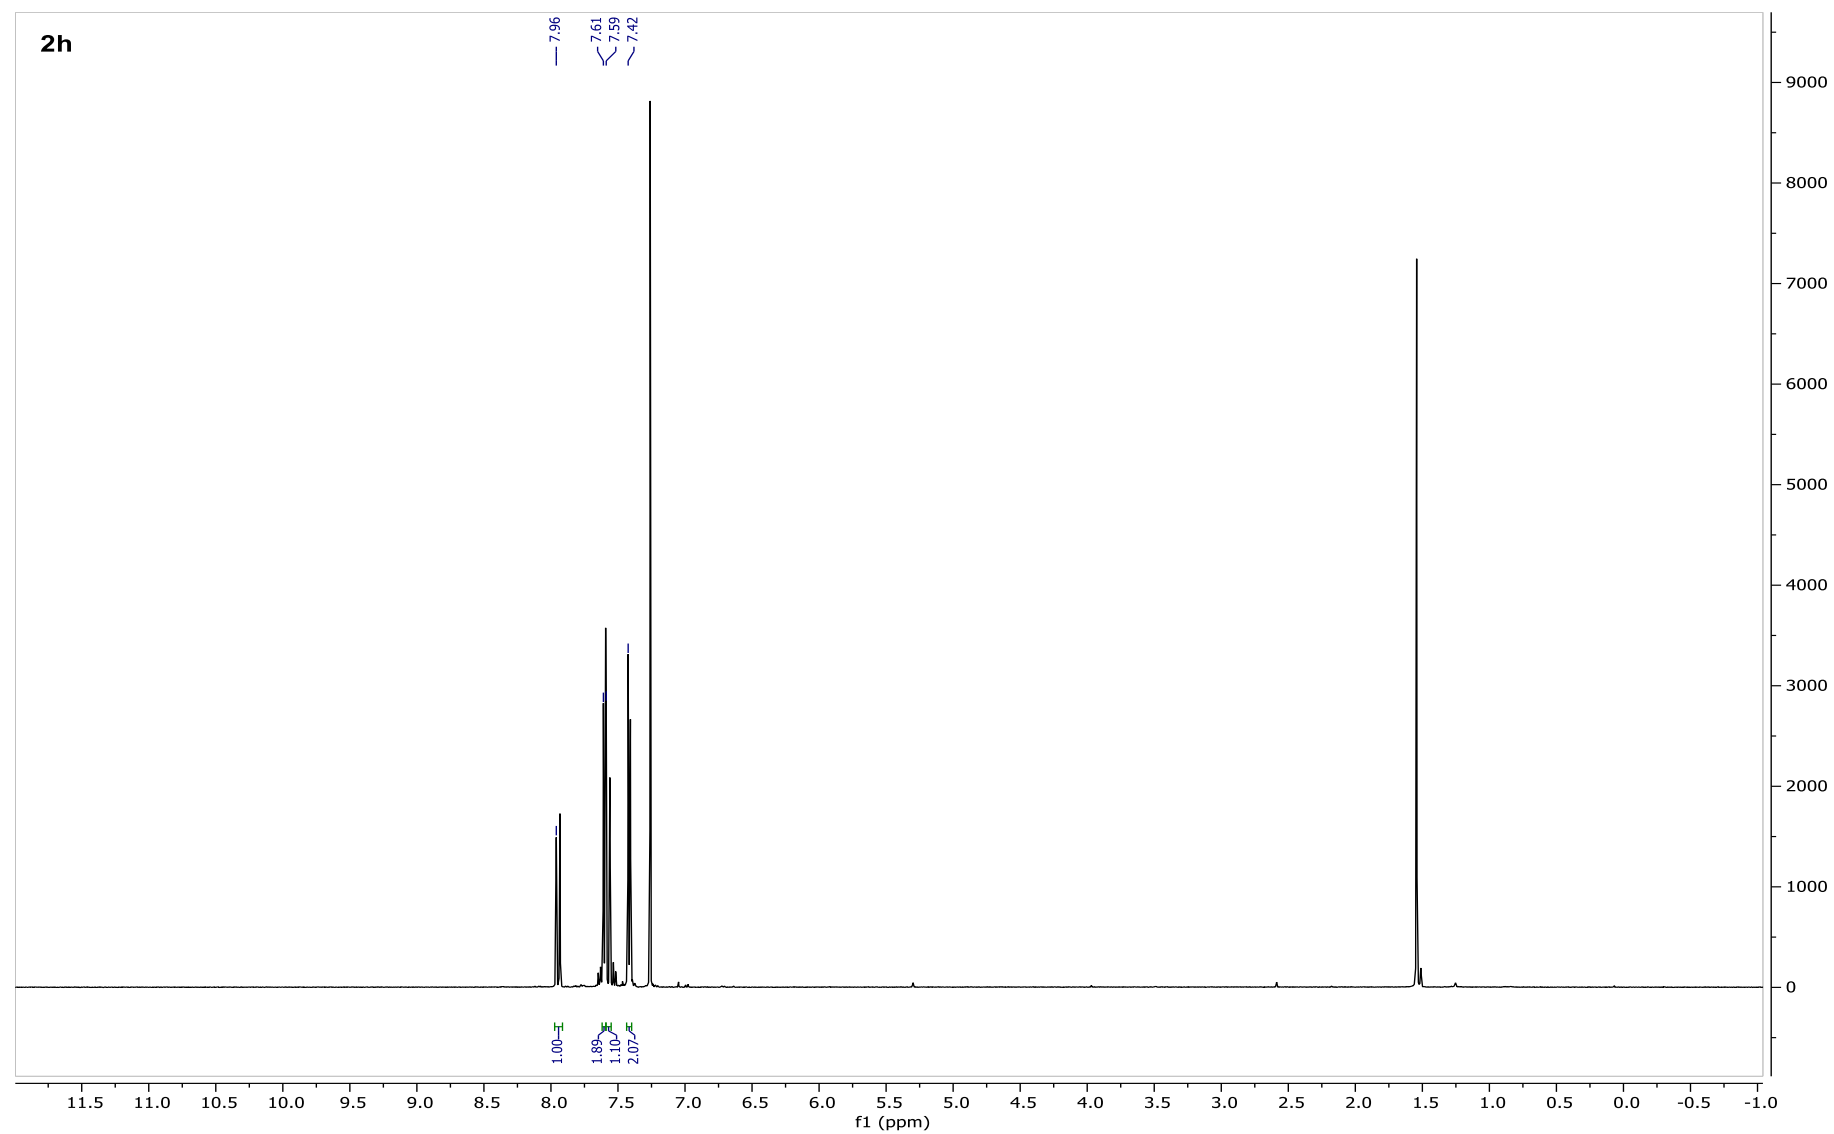

$^{13}\text{C}$  NMR (101 MHz,  $\text{CDCl}_3$ ):

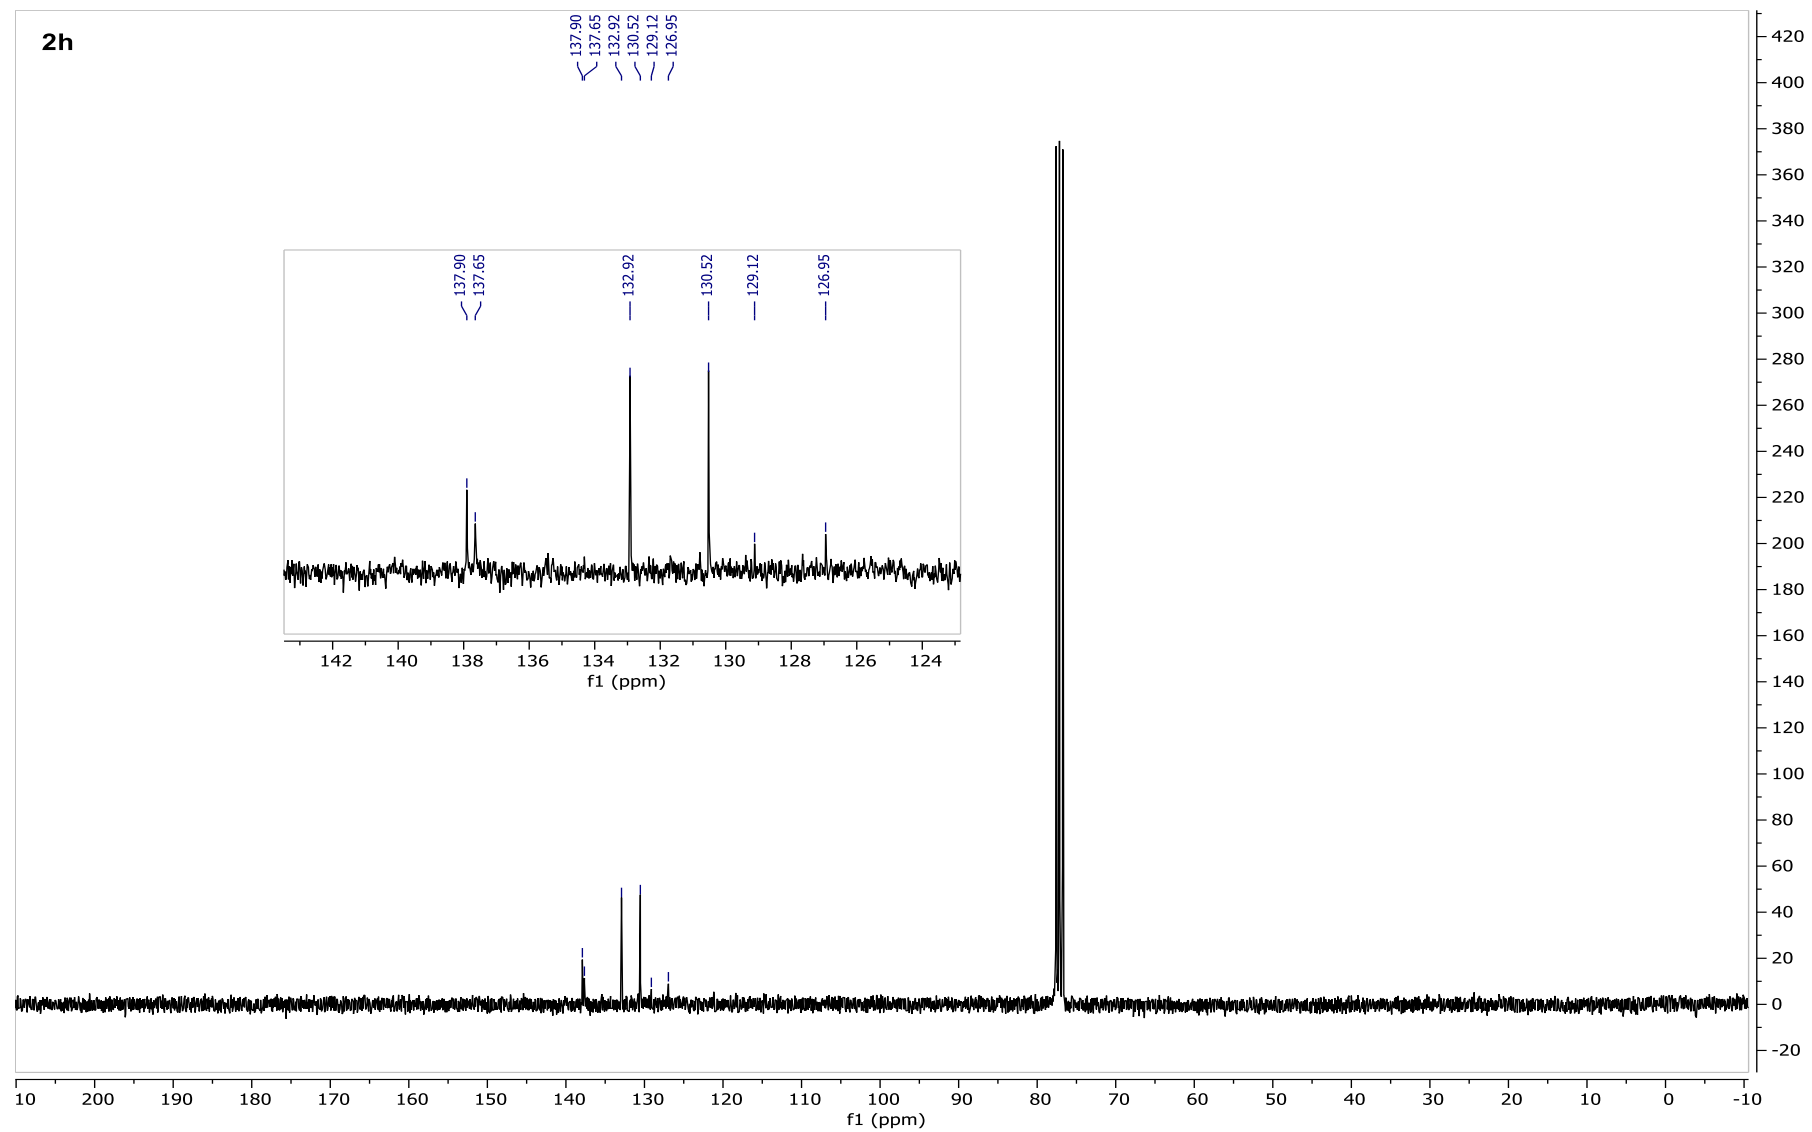

Methyl 4-(2',2',3',3'-tetramethyl-4'-nitrocyclobutyl)benzoate (2i):  $^1\text{H}$  NMR (400 MHz,  $\text{CDCl}_3$ ):

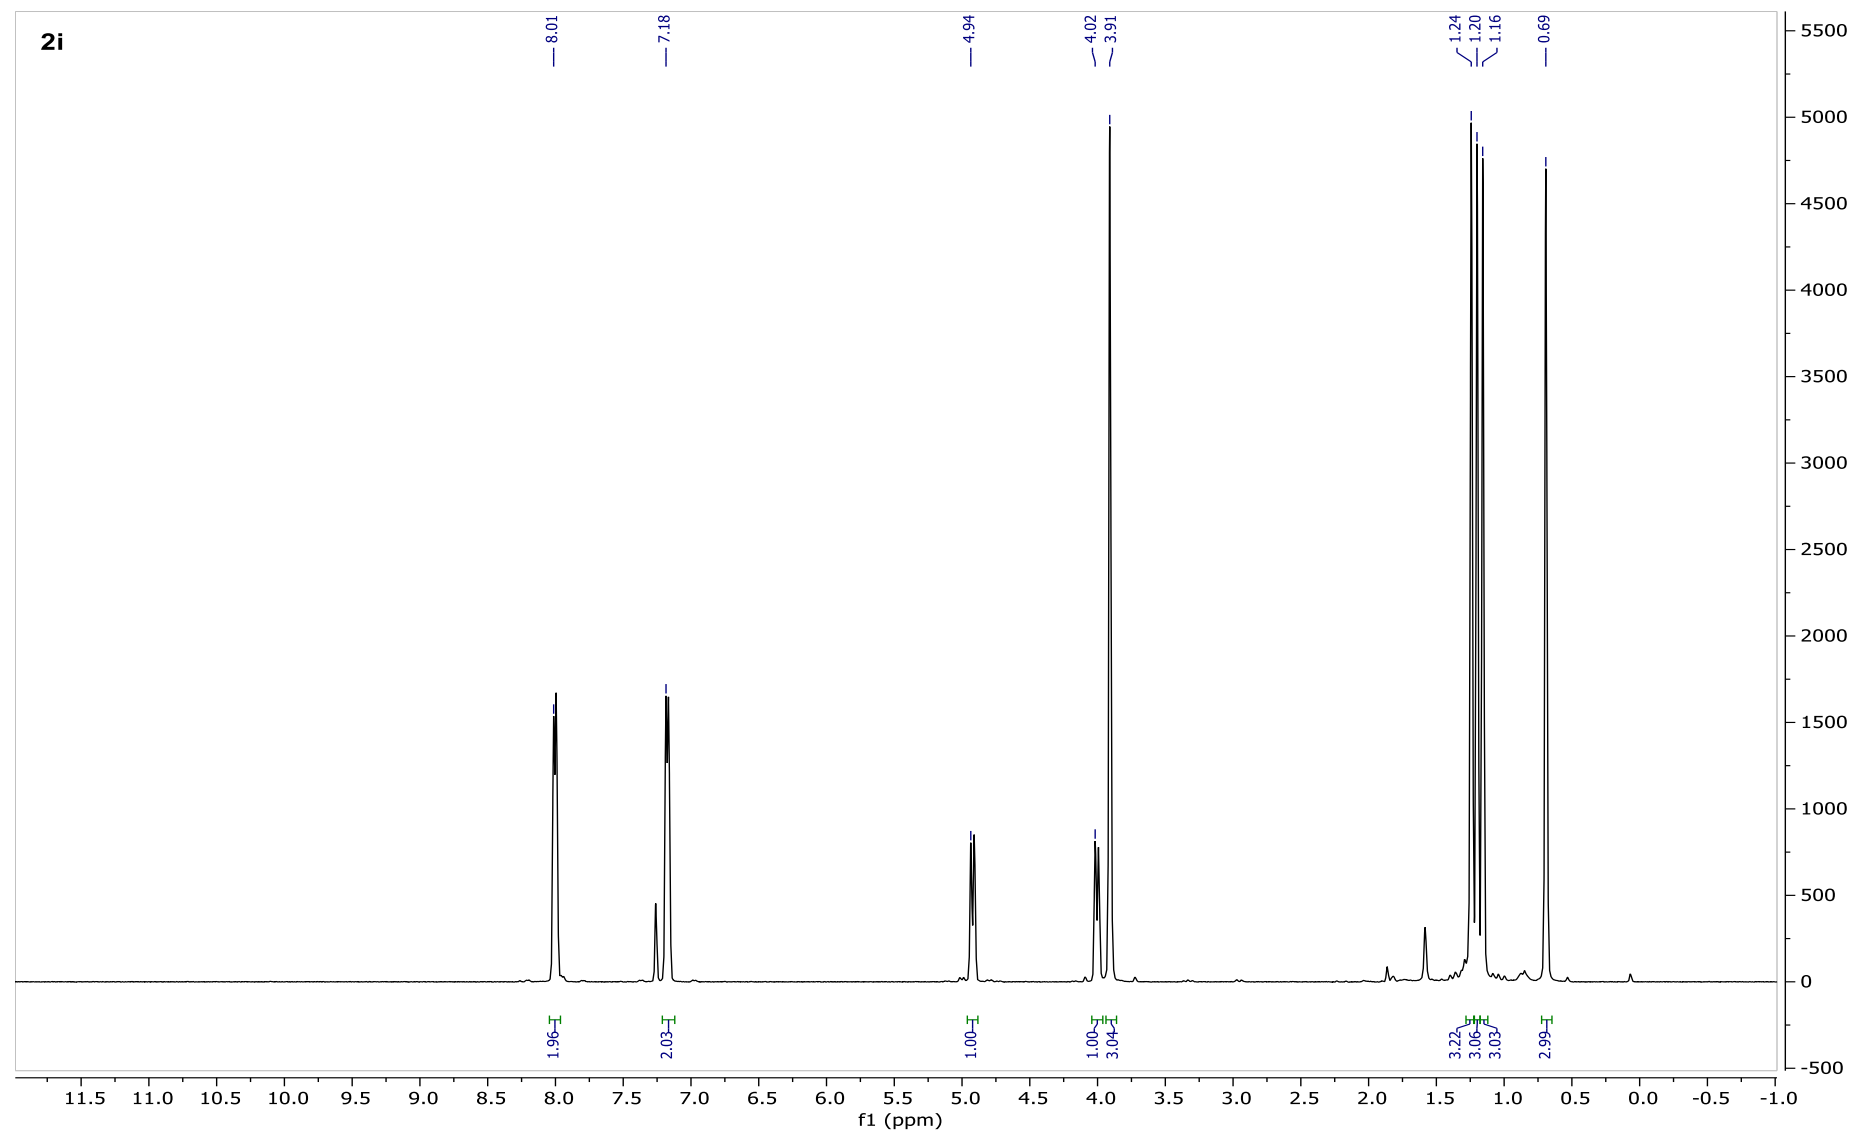



<sup>13</sup>C NMR (101 MHz, CDCl<sub>3</sub>):

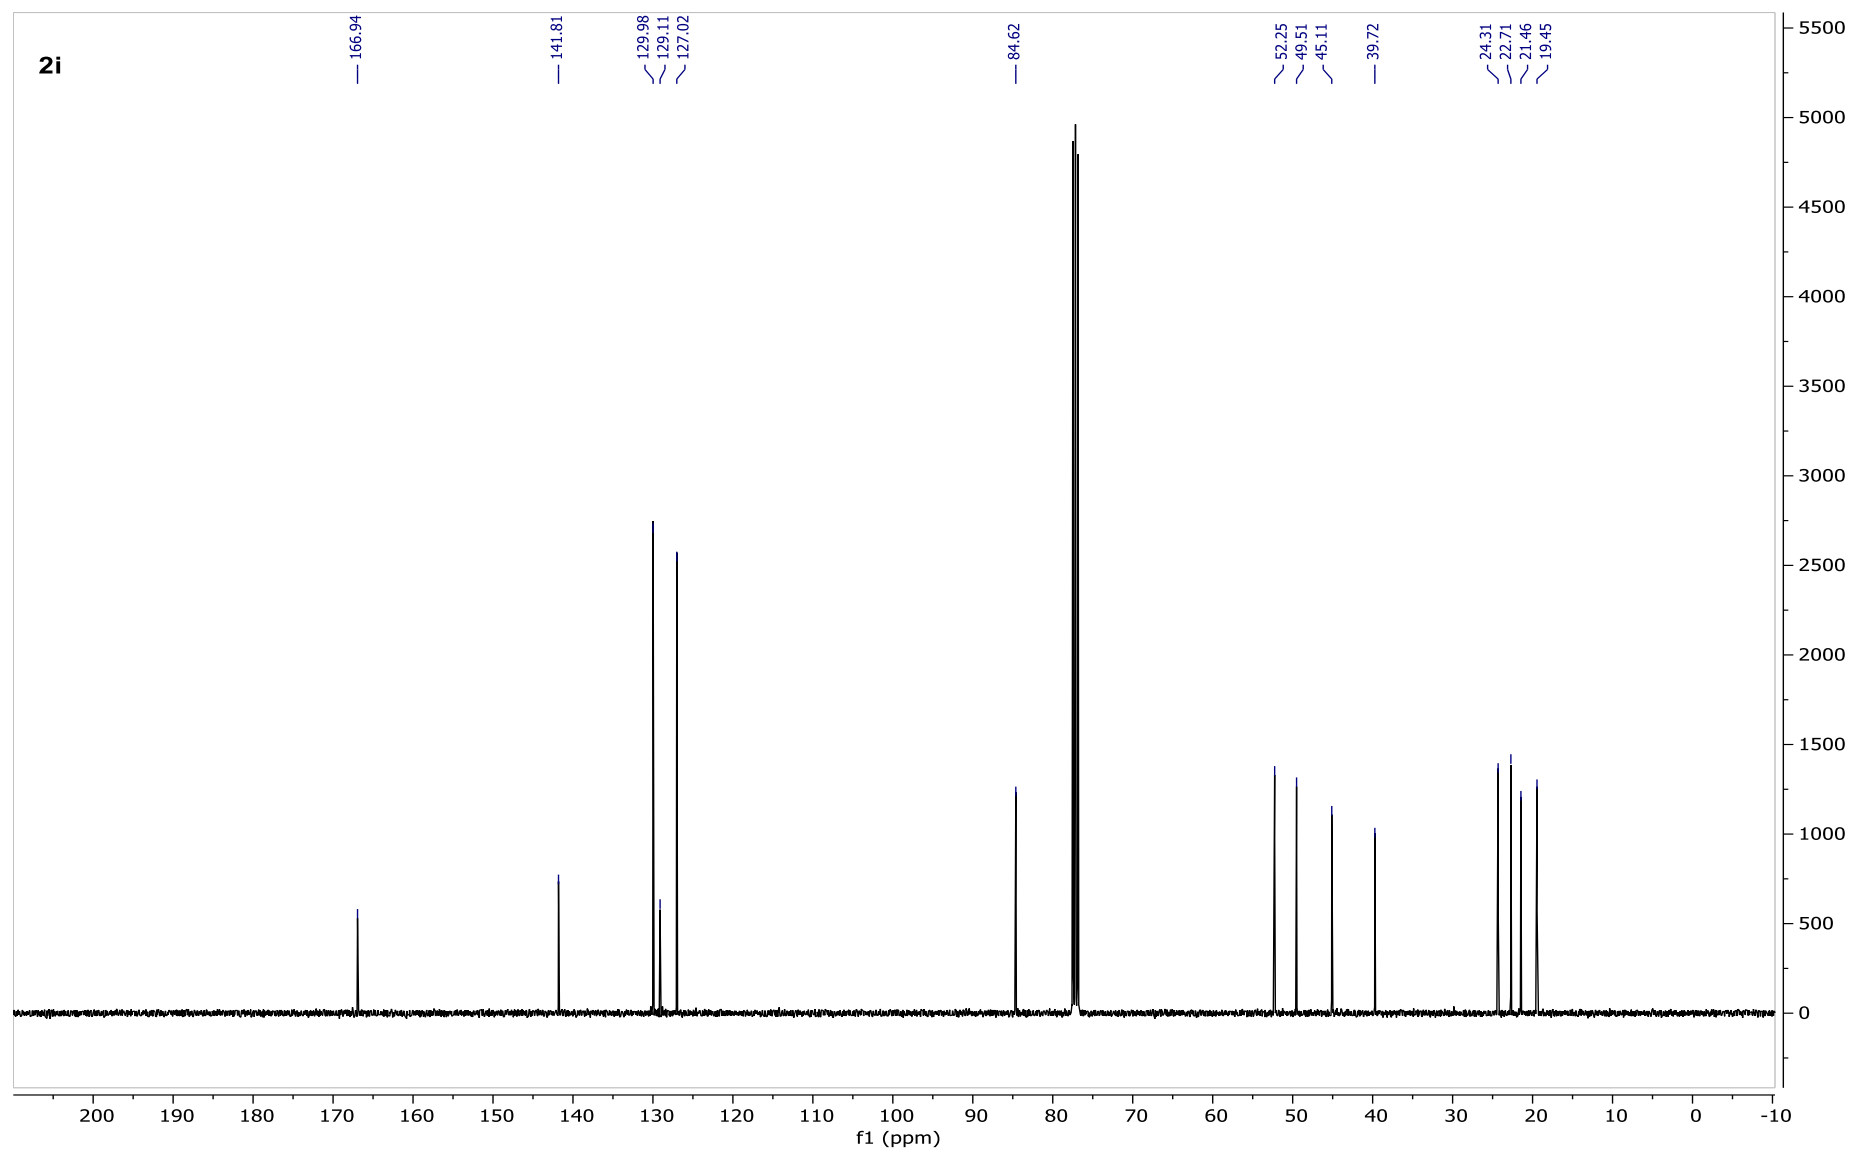

Methyl 4-(4'-methyl-2'-nitropent-4'-en-1'-yl)benzoate: <sup>1</sup>H NMR (500 MHz, CDCl<sub>3</sub>):

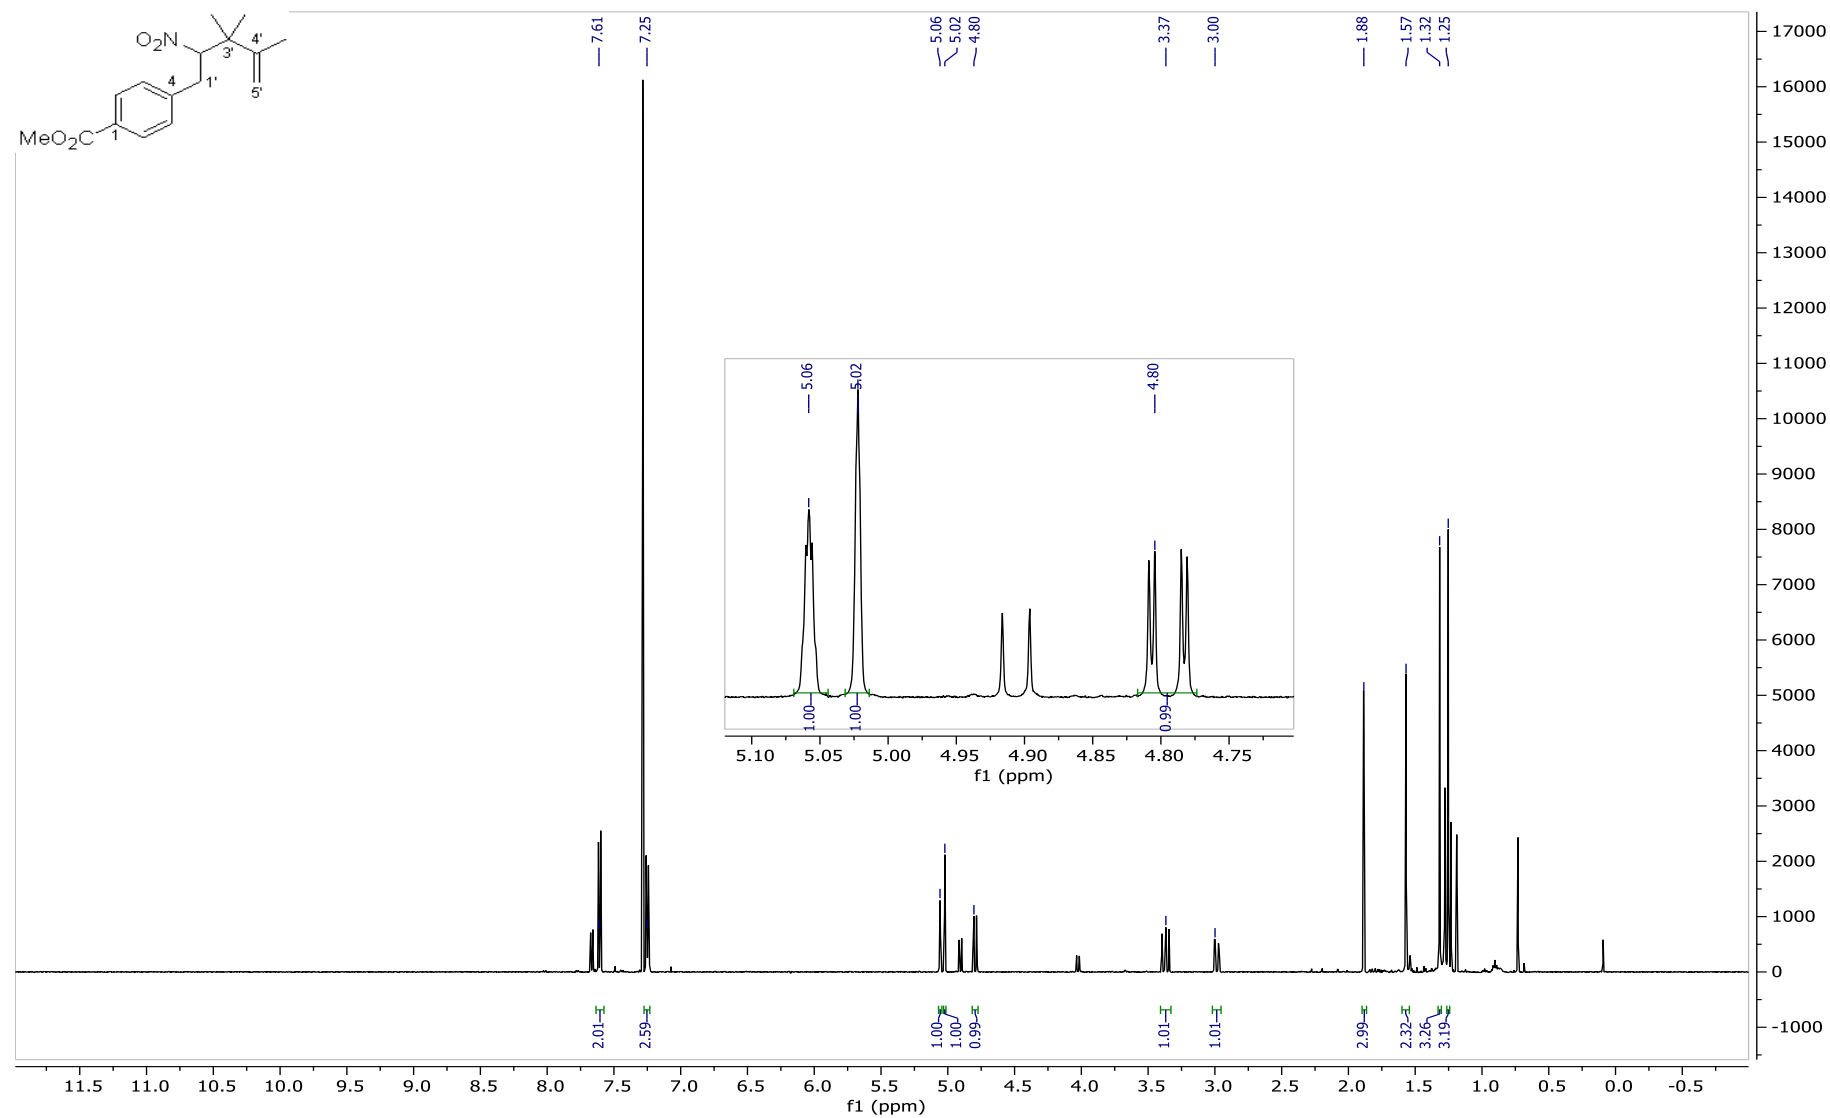

<sup>13</sup>C NMR (101 MHz, CDCl<sub>3</sub>):

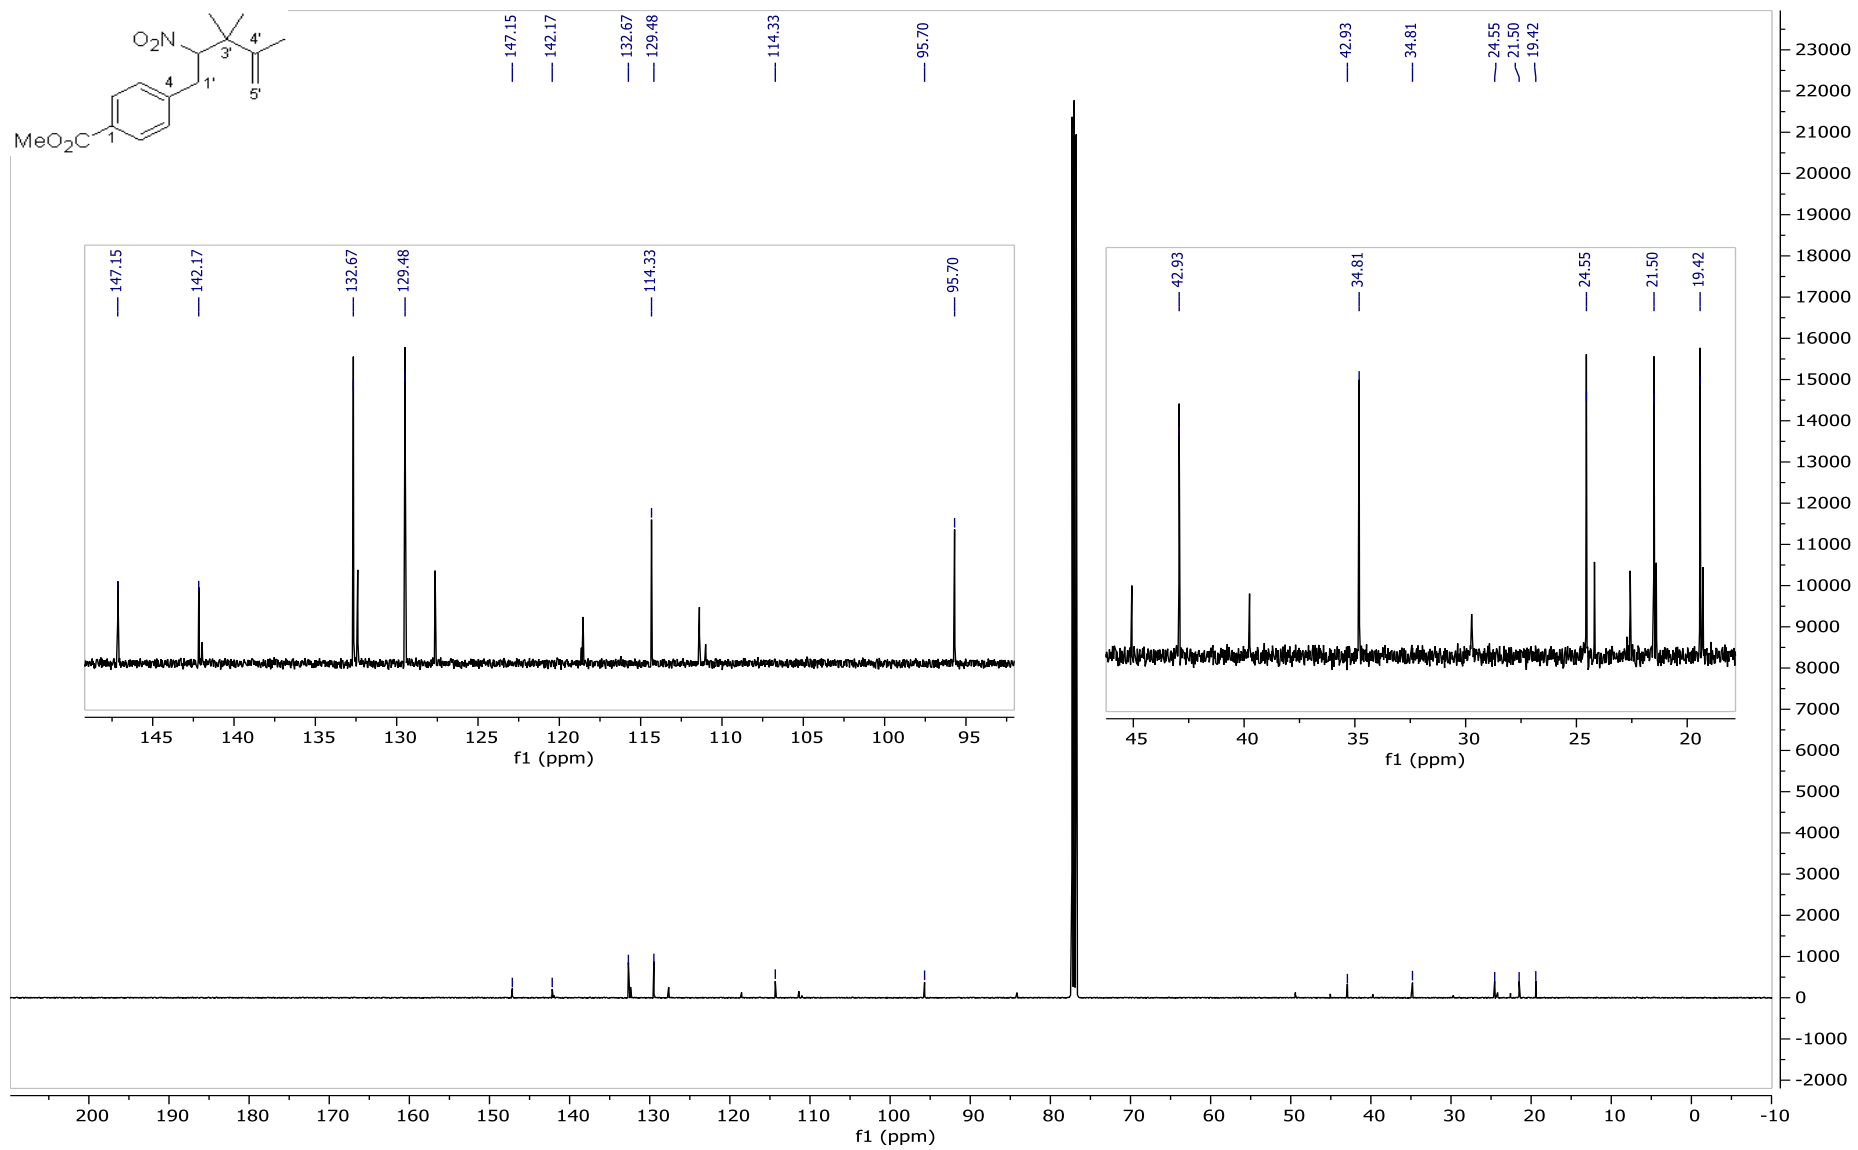

**1-Chloro-3-(2',2',3',3'-tetramethyl-4'-nitrocyclobutyl)benzene (2j): <sup>1</sup>H NMR (400 MHz, CDCl<sub>3</sub>):**

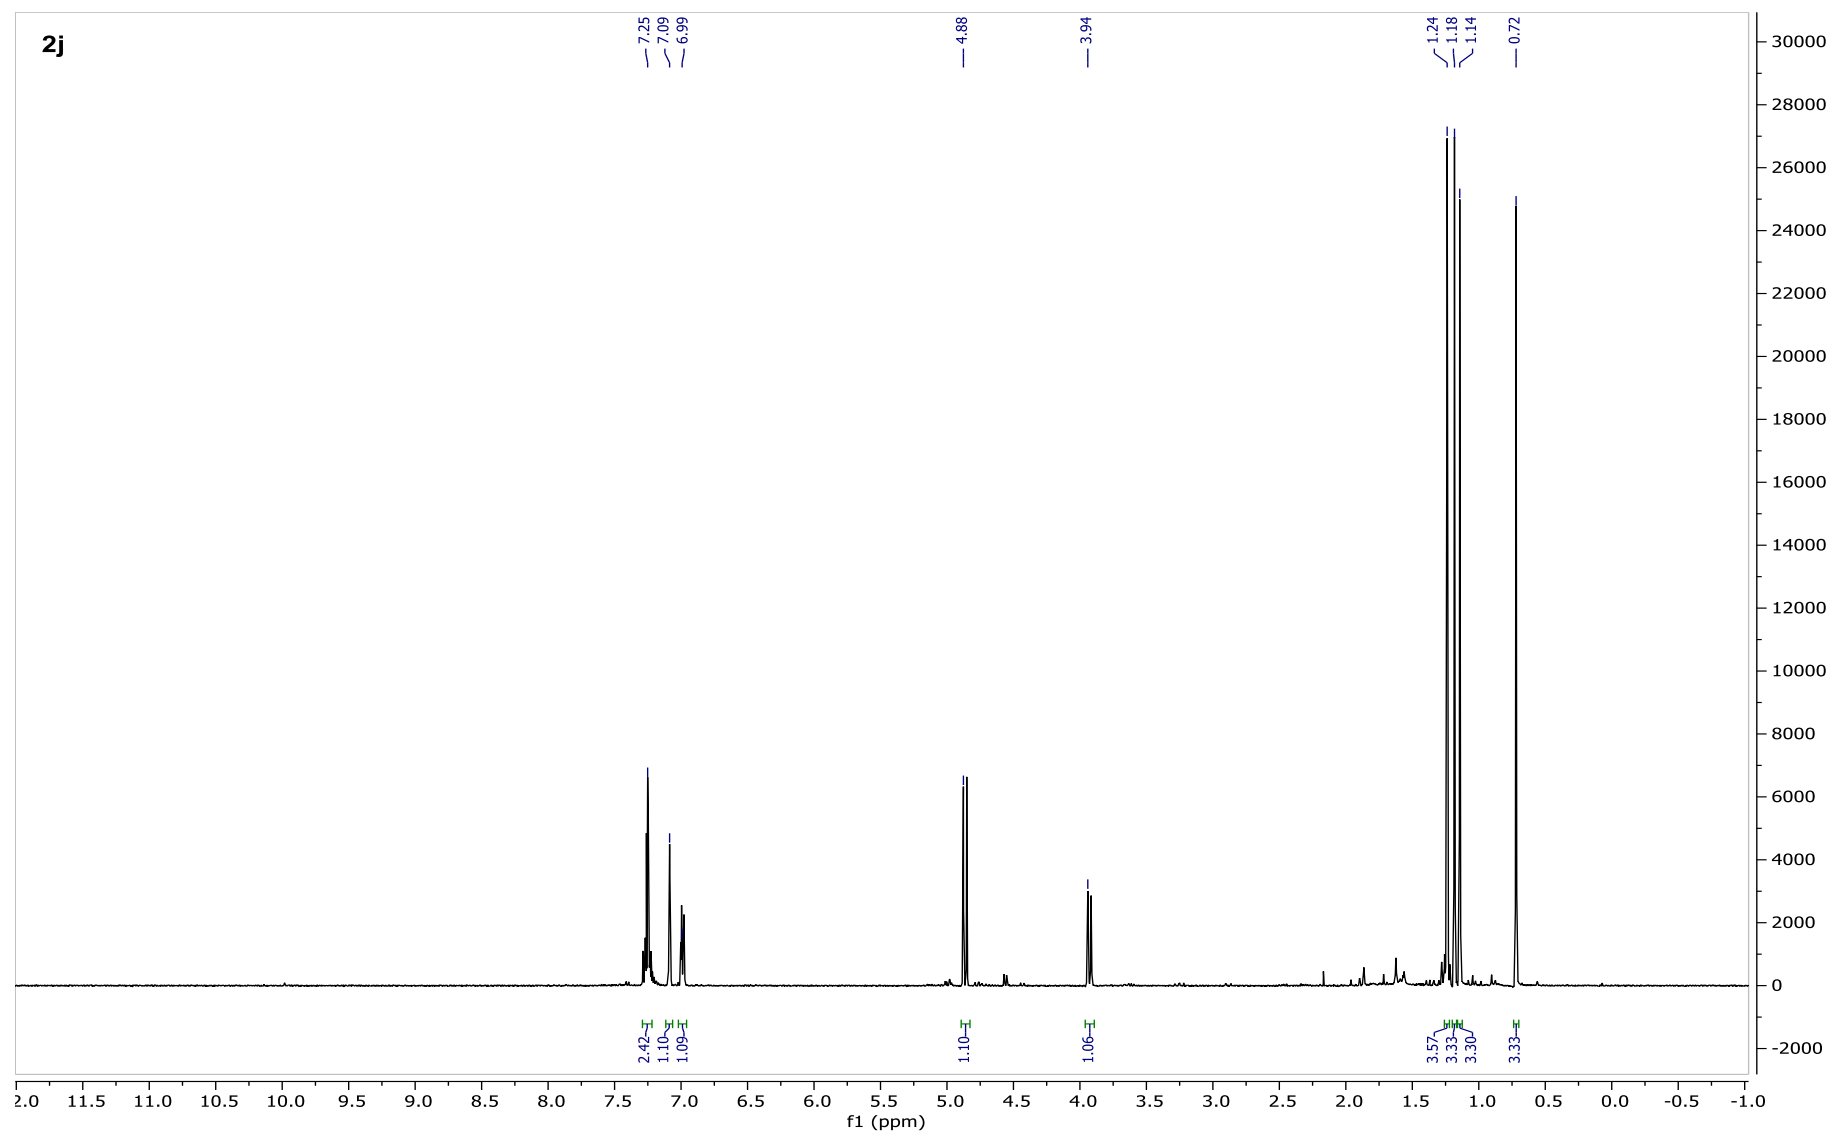

<sup>13</sup>C NMR (101 MHz, CDCl<sub>3</sub>):

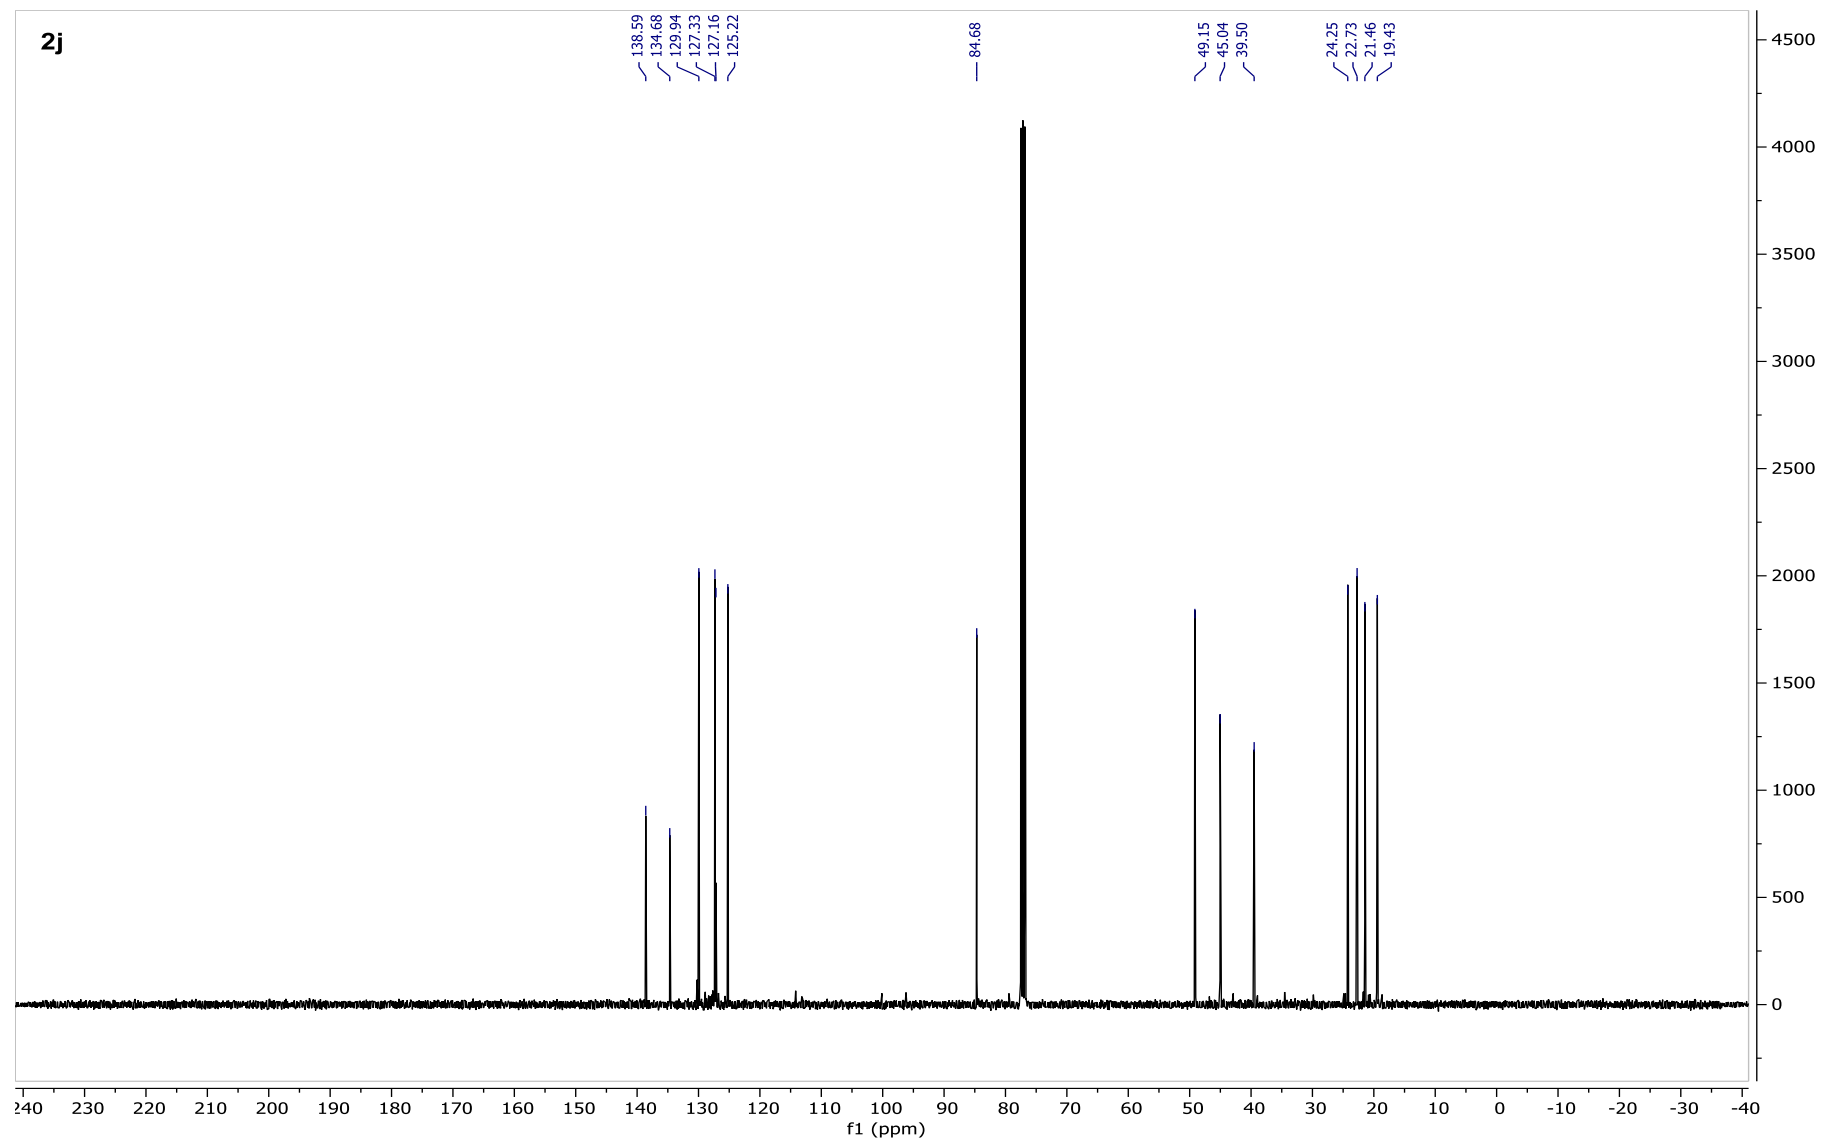

**3-(2',2',3',3'-Tetramethyl-4'-nitrocyclobutyl)benzonitrile (2k): <sup>1</sup>H NMR (300 MHz, CDCl<sub>3</sub>):**

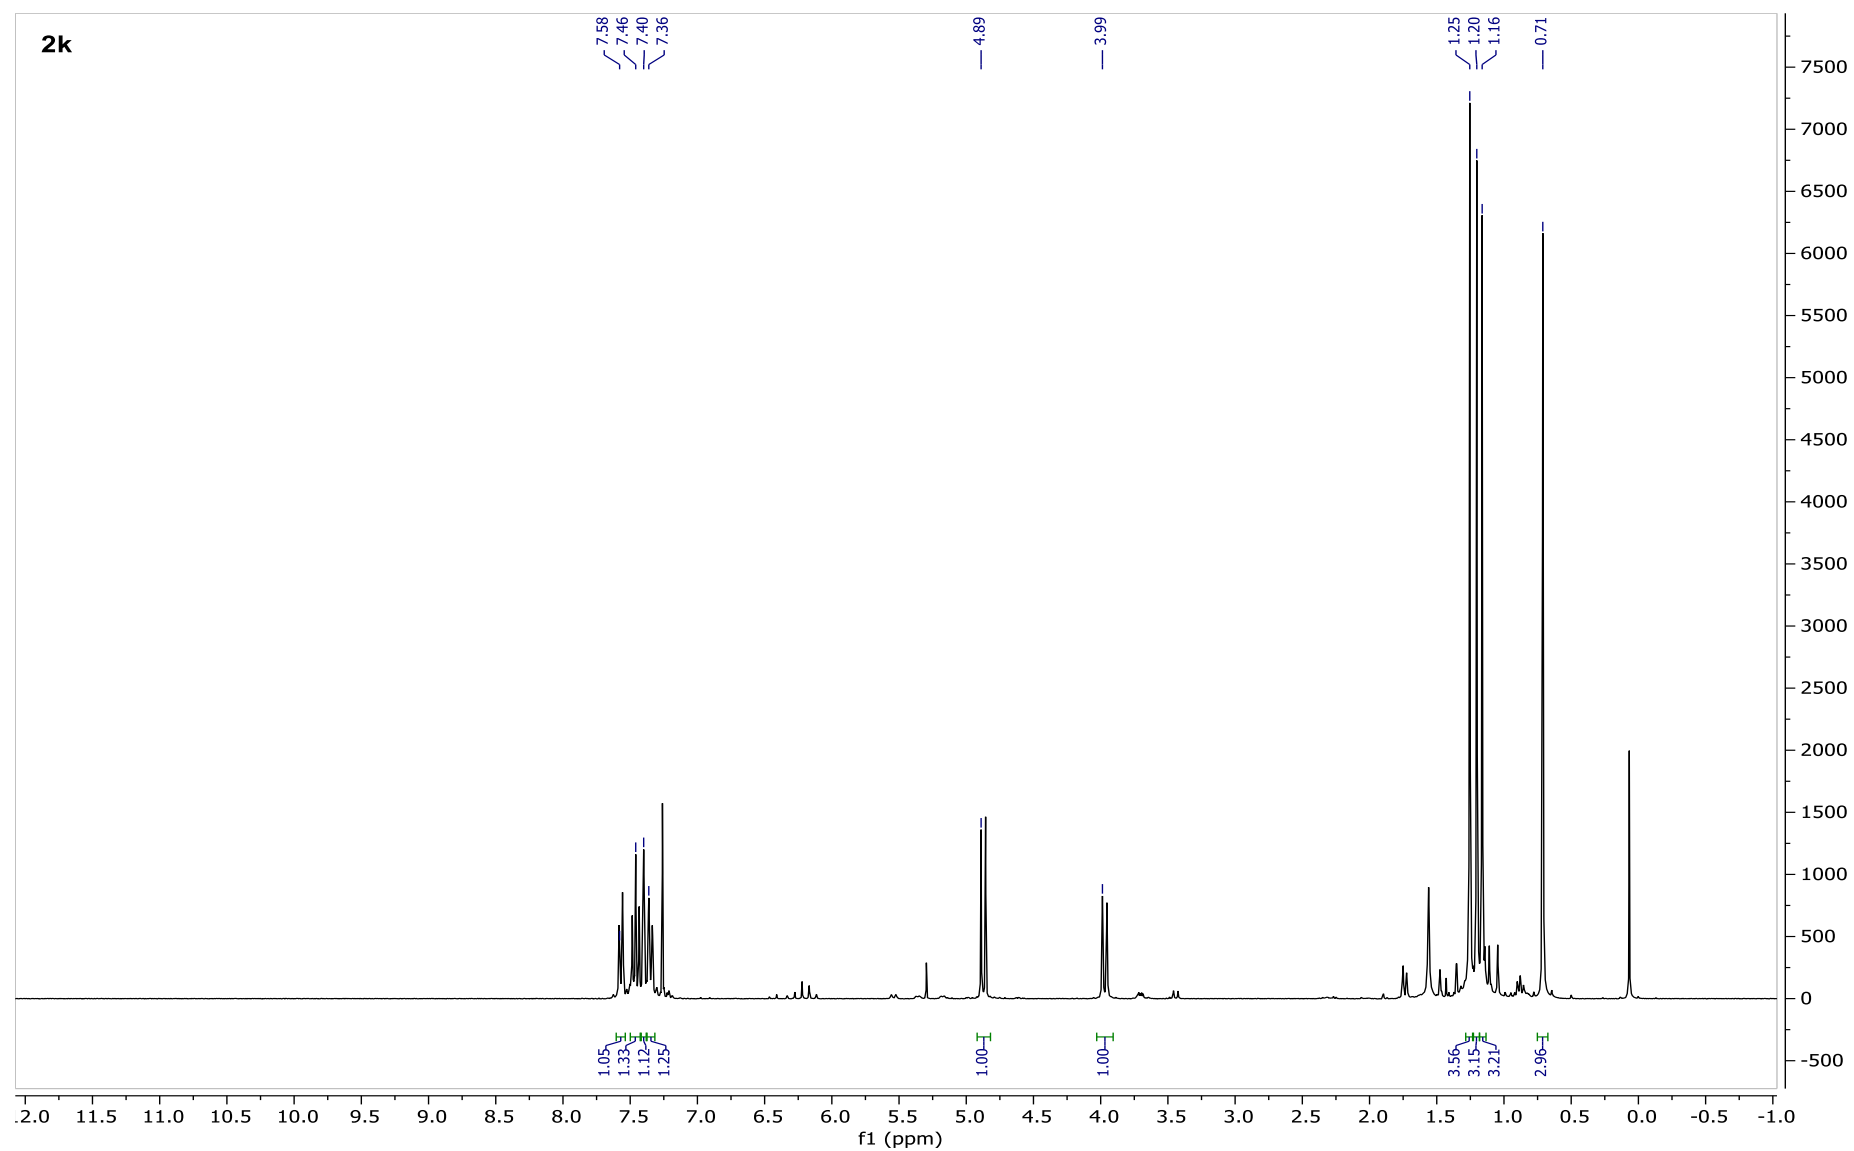

$^{13}\text{C}$  NMR (75 MHz,  $\text{CDCl}_3$ ):

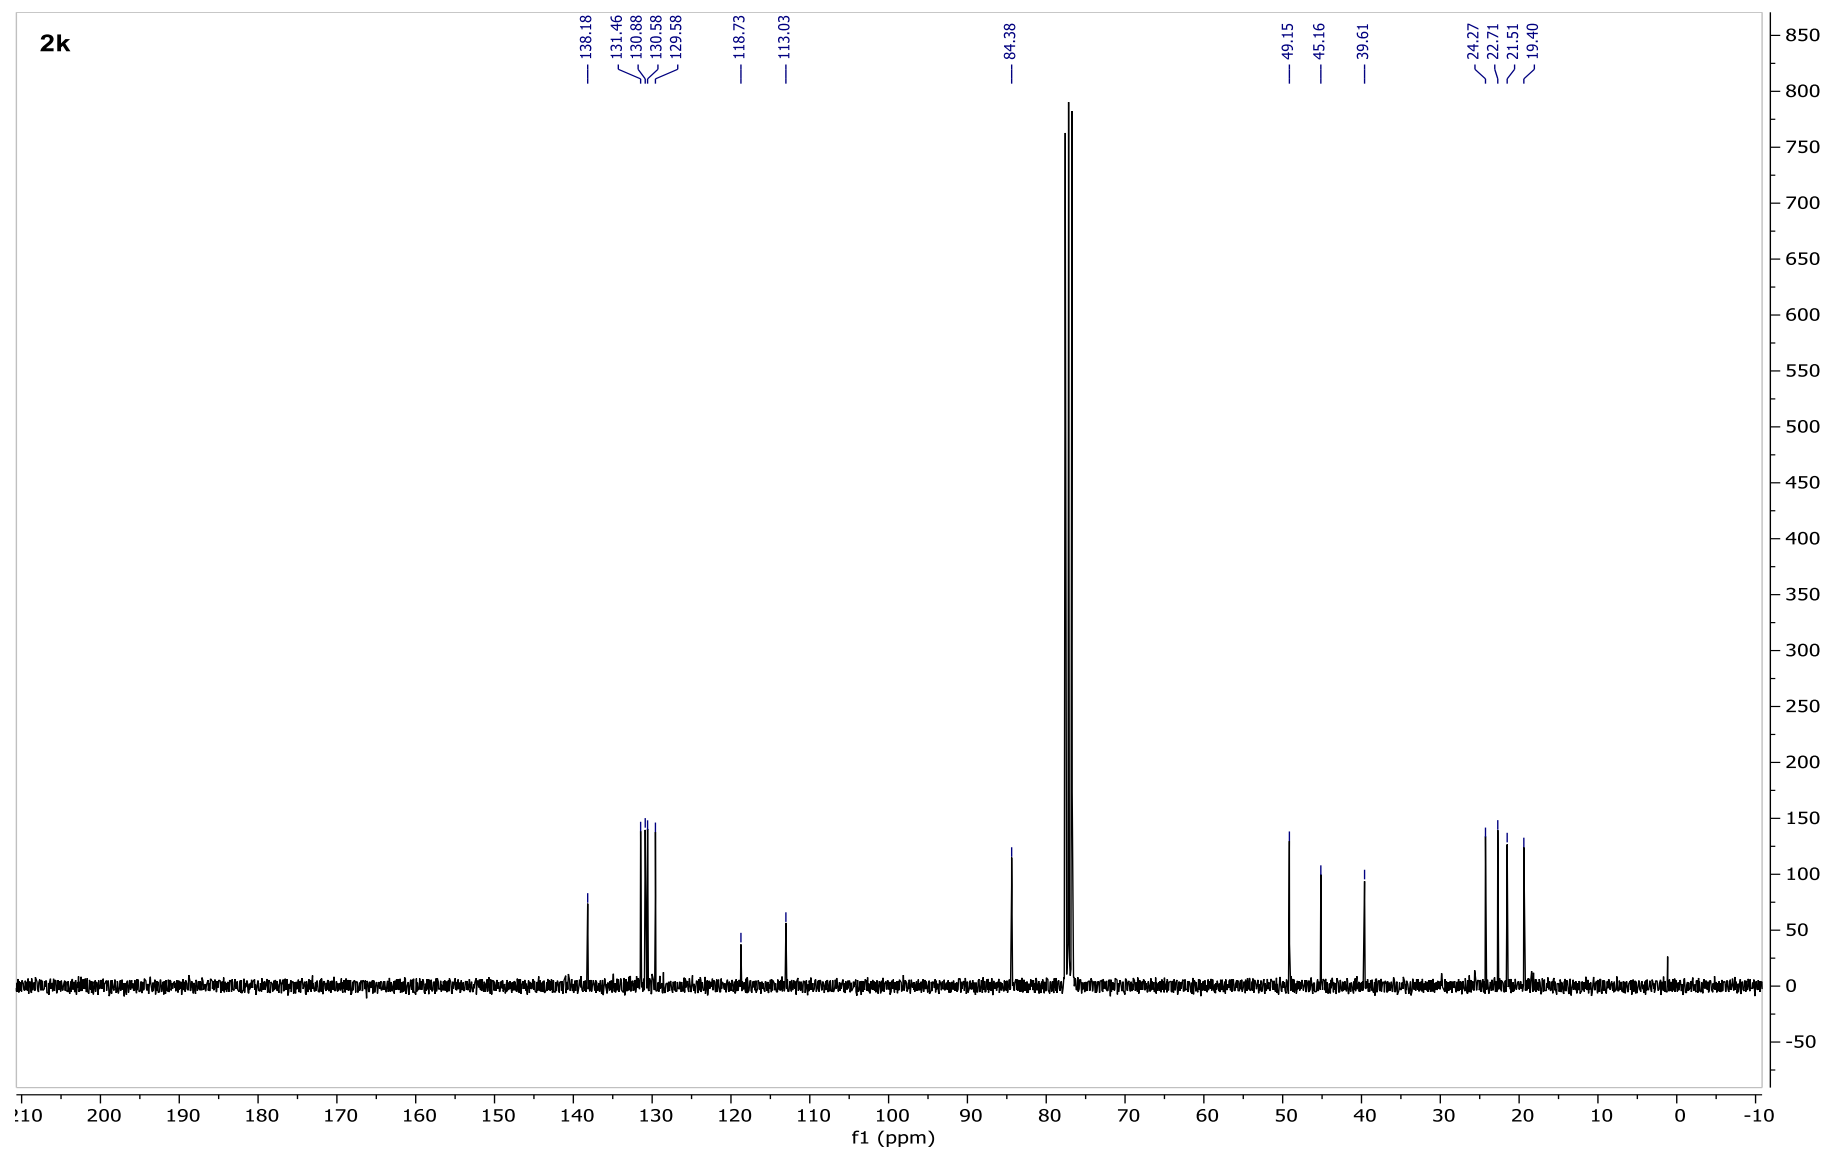

**3-(3',3',4'-trimethyl-2'-nitropent-4'-en-1'-yl)-benzonitrile (6): <sup>1</sup>H NMR (500 MHz, CDCl<sub>3</sub>):**

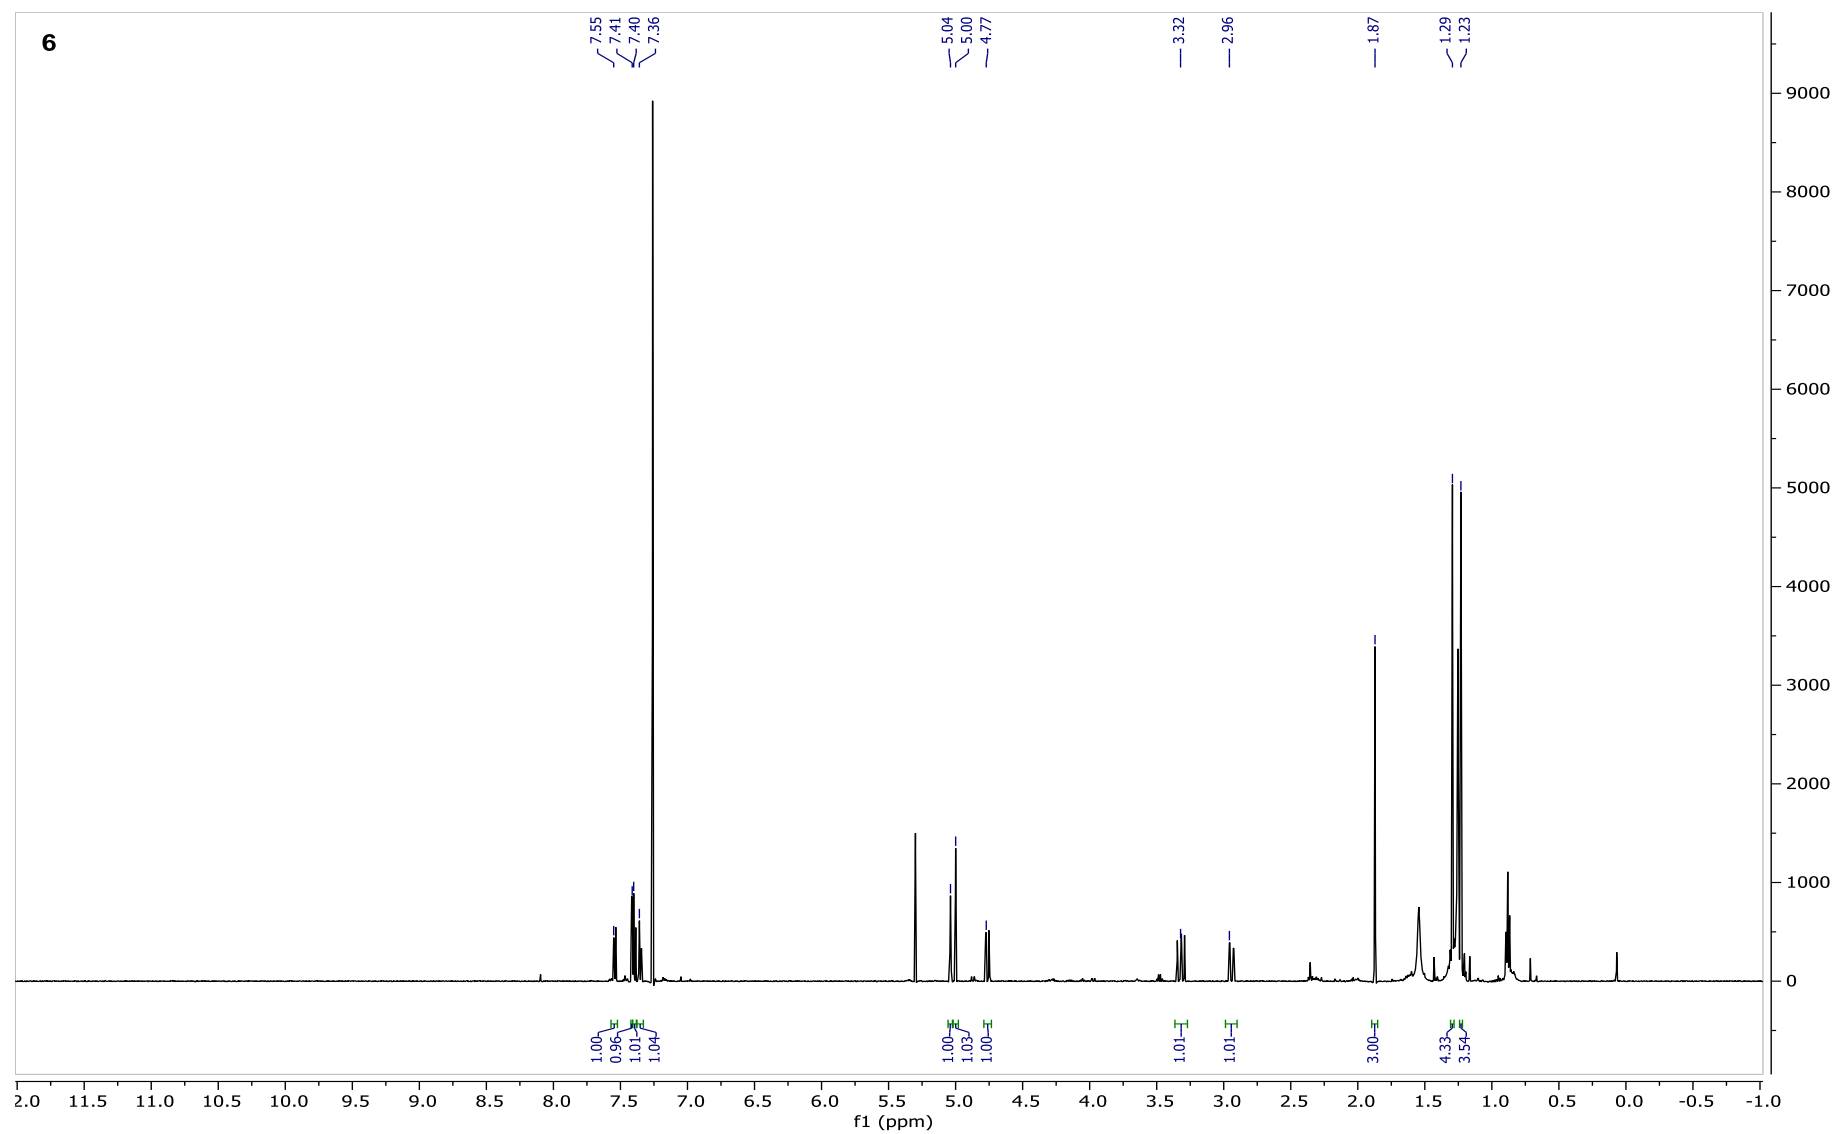



<sup>13</sup>C NMR (126 MHz, CDCl<sub>3</sub>):

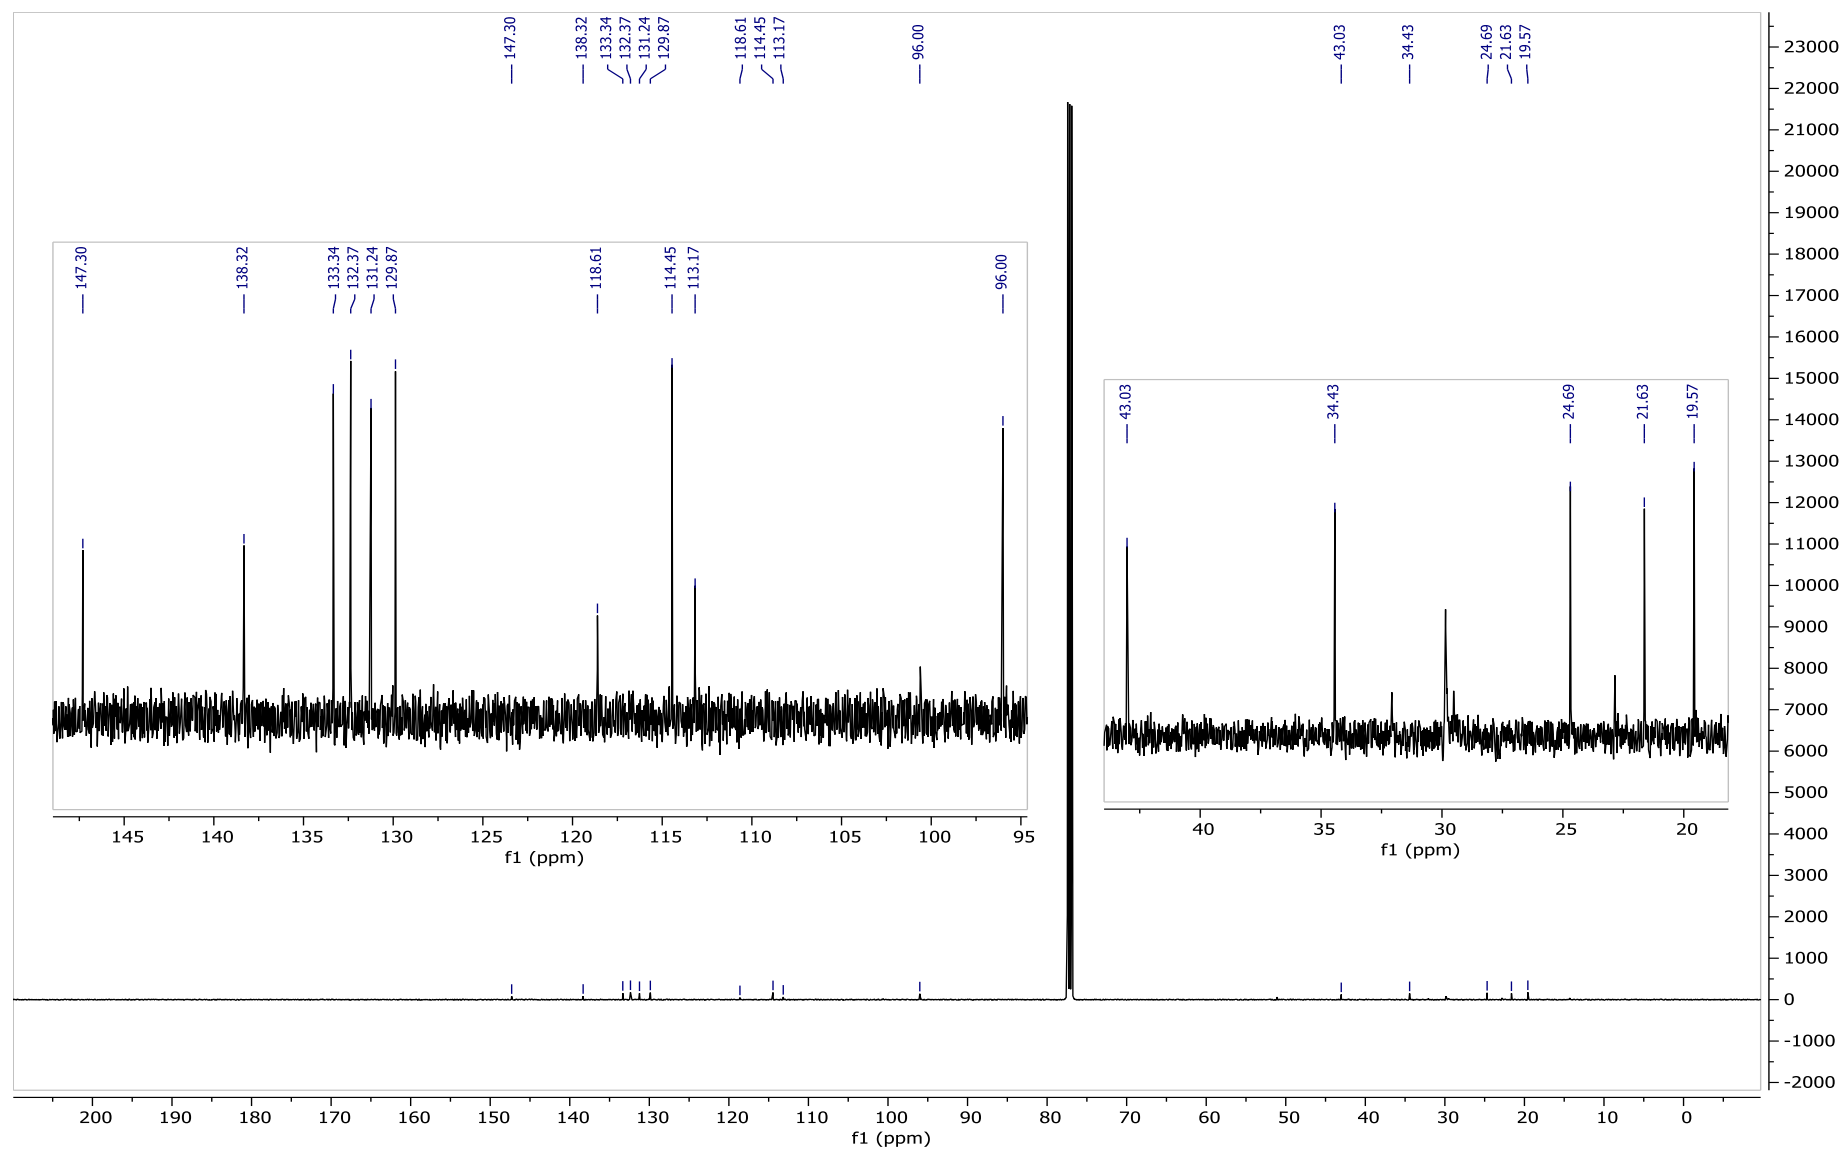

**1-Chloro-2-(2',2',3',3'-tetramethyl-4'-nitrocyclobutyl)benzene (2l):  $^1\text{H}$  NMR (400 MHz,  $\text{CDCl}_3$ ):**

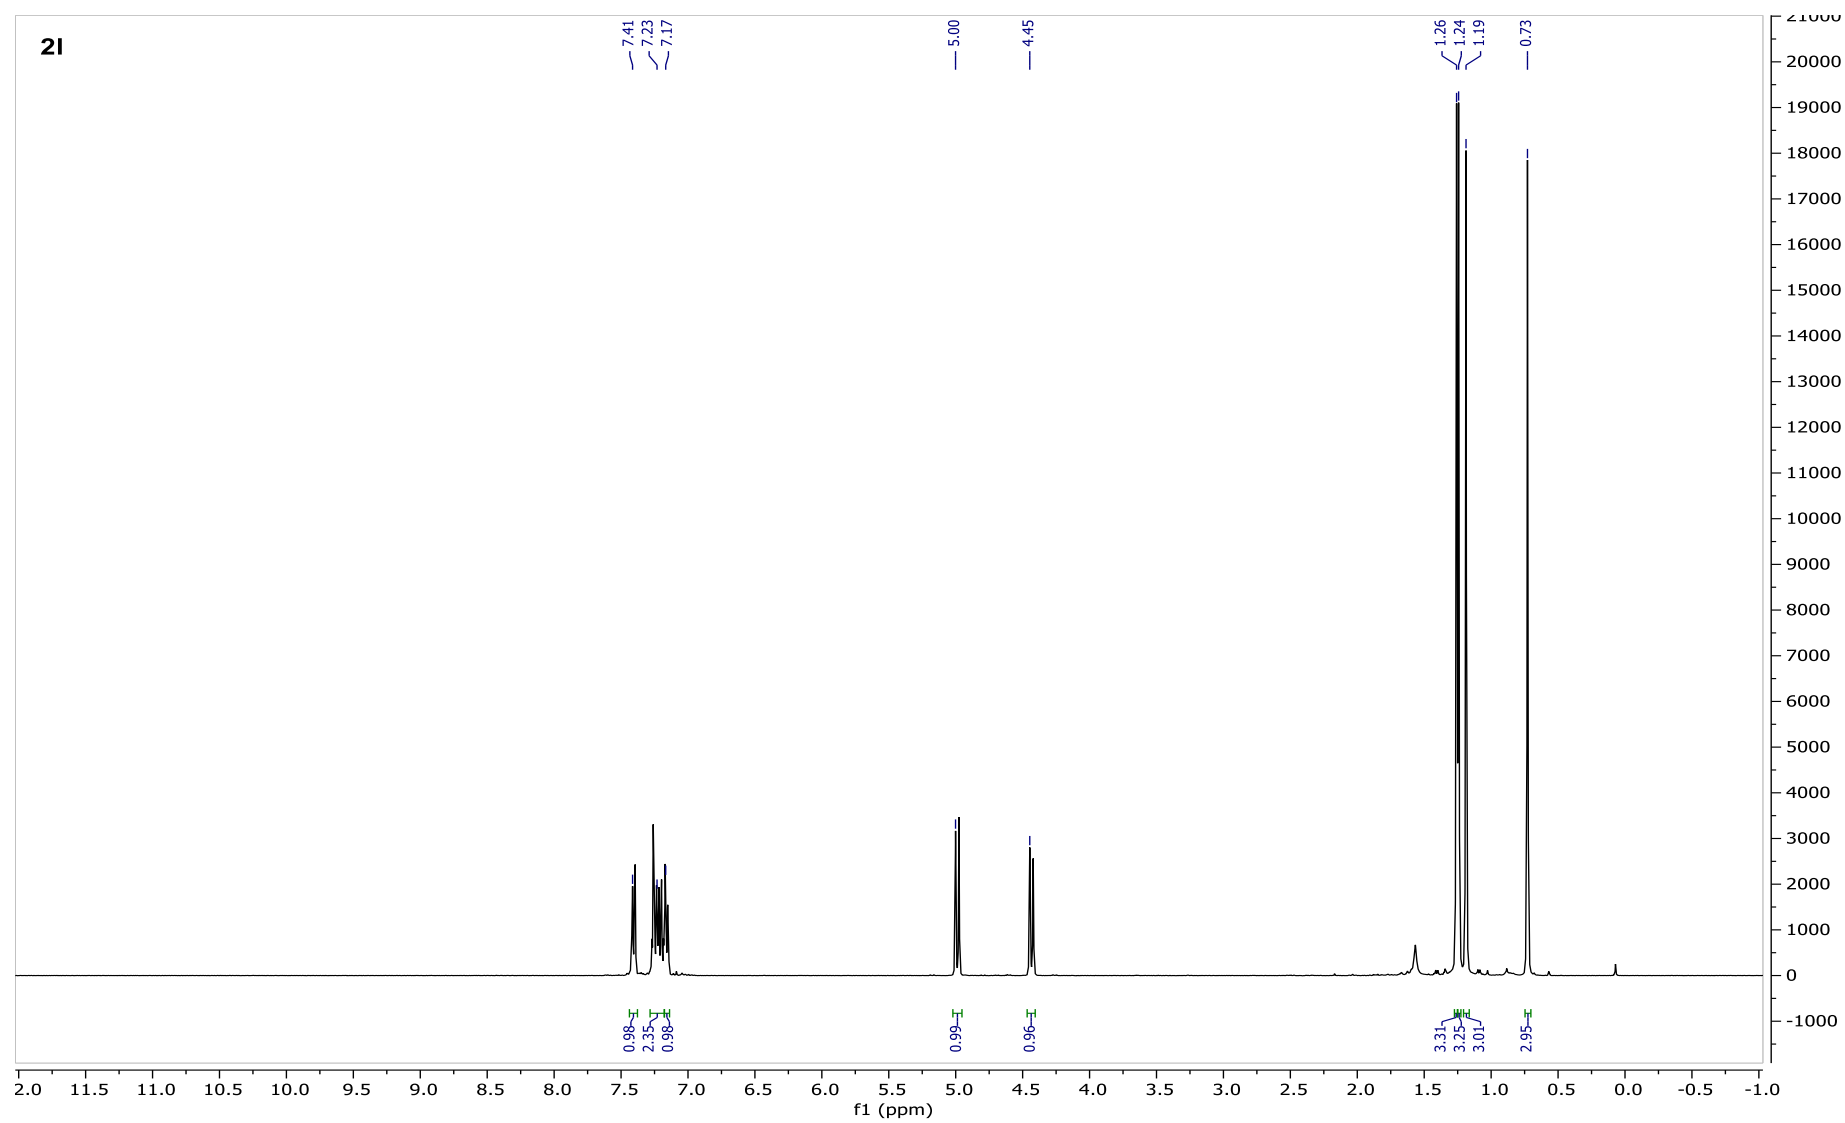

<sup>13</sup>C NMR (101 MHz, CDCl<sub>3</sub>):

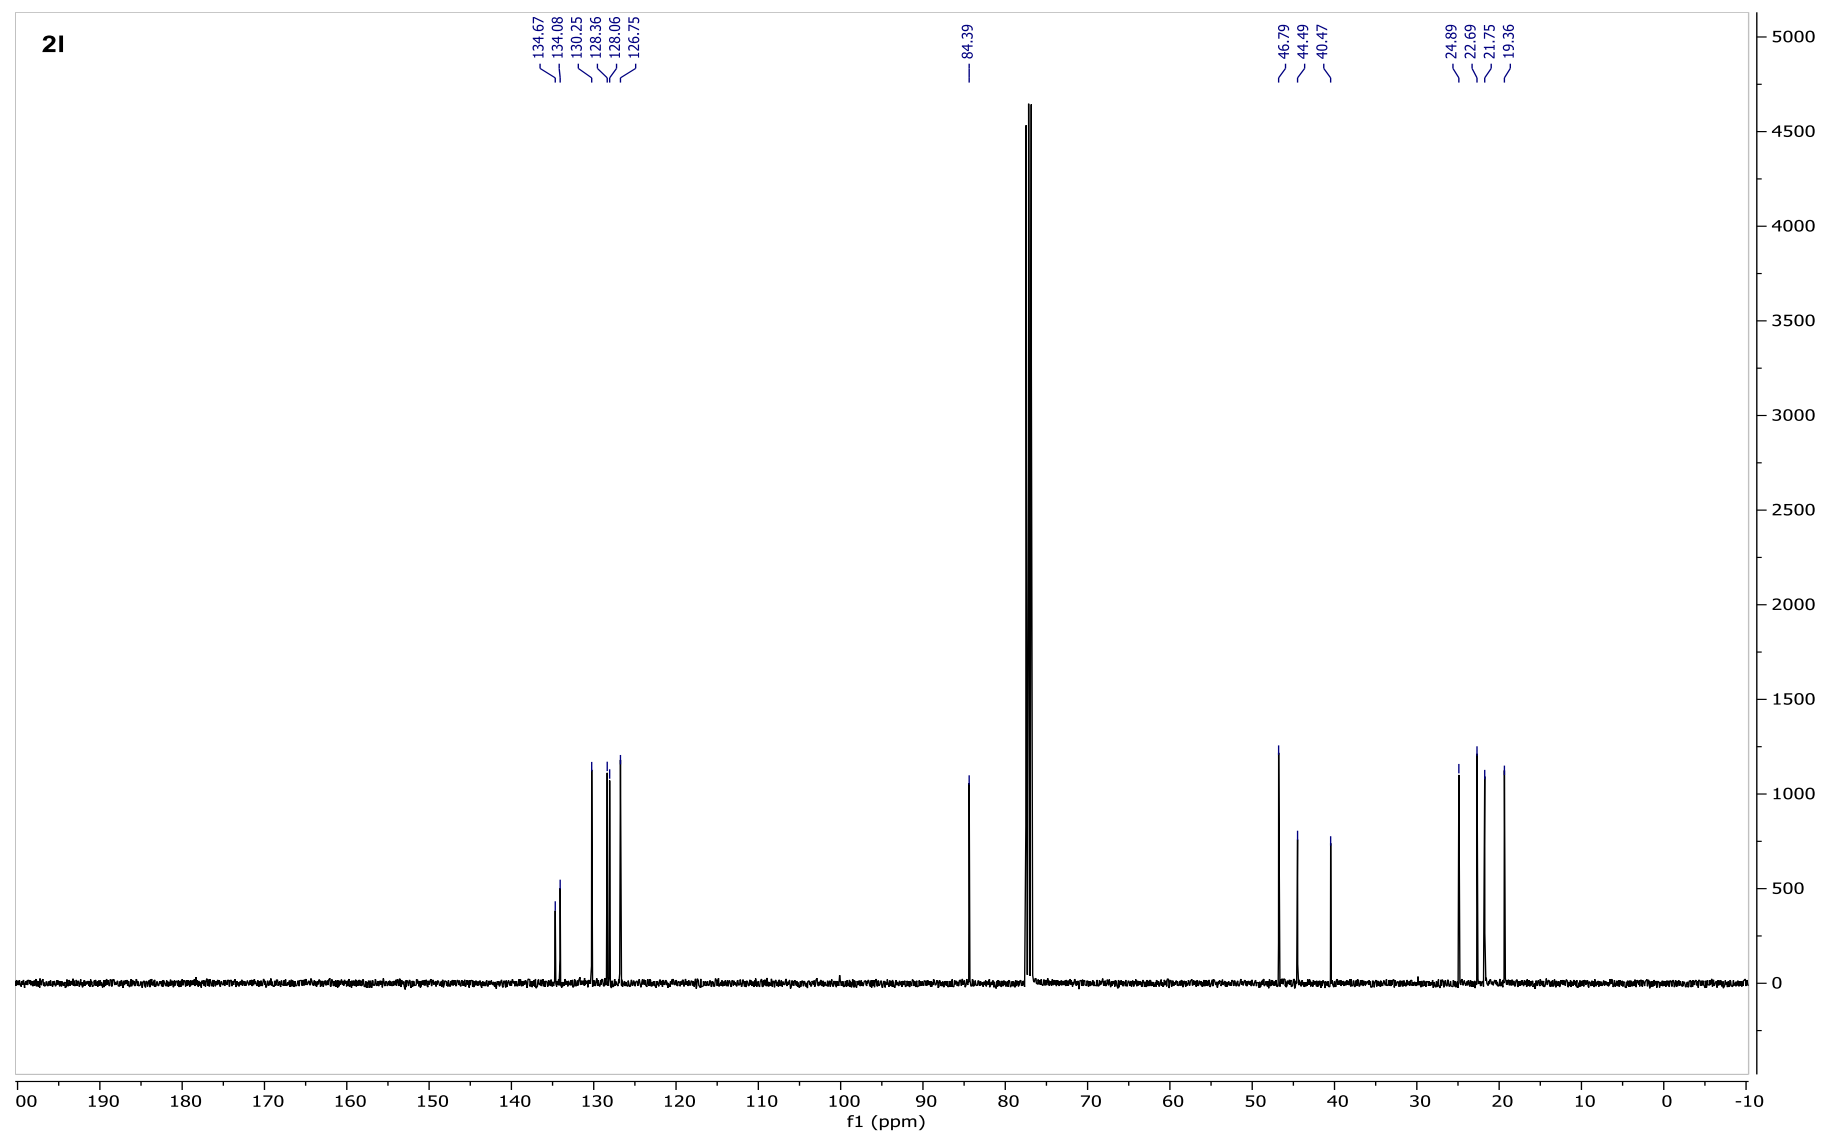

2-(2',2',3',3'-tetramethyl-4'-nitrocyclobutyl)pyridine (2m):  $^1\text{H}$  NMR (300 MHz,  $\text{CDCl}_3$ ):

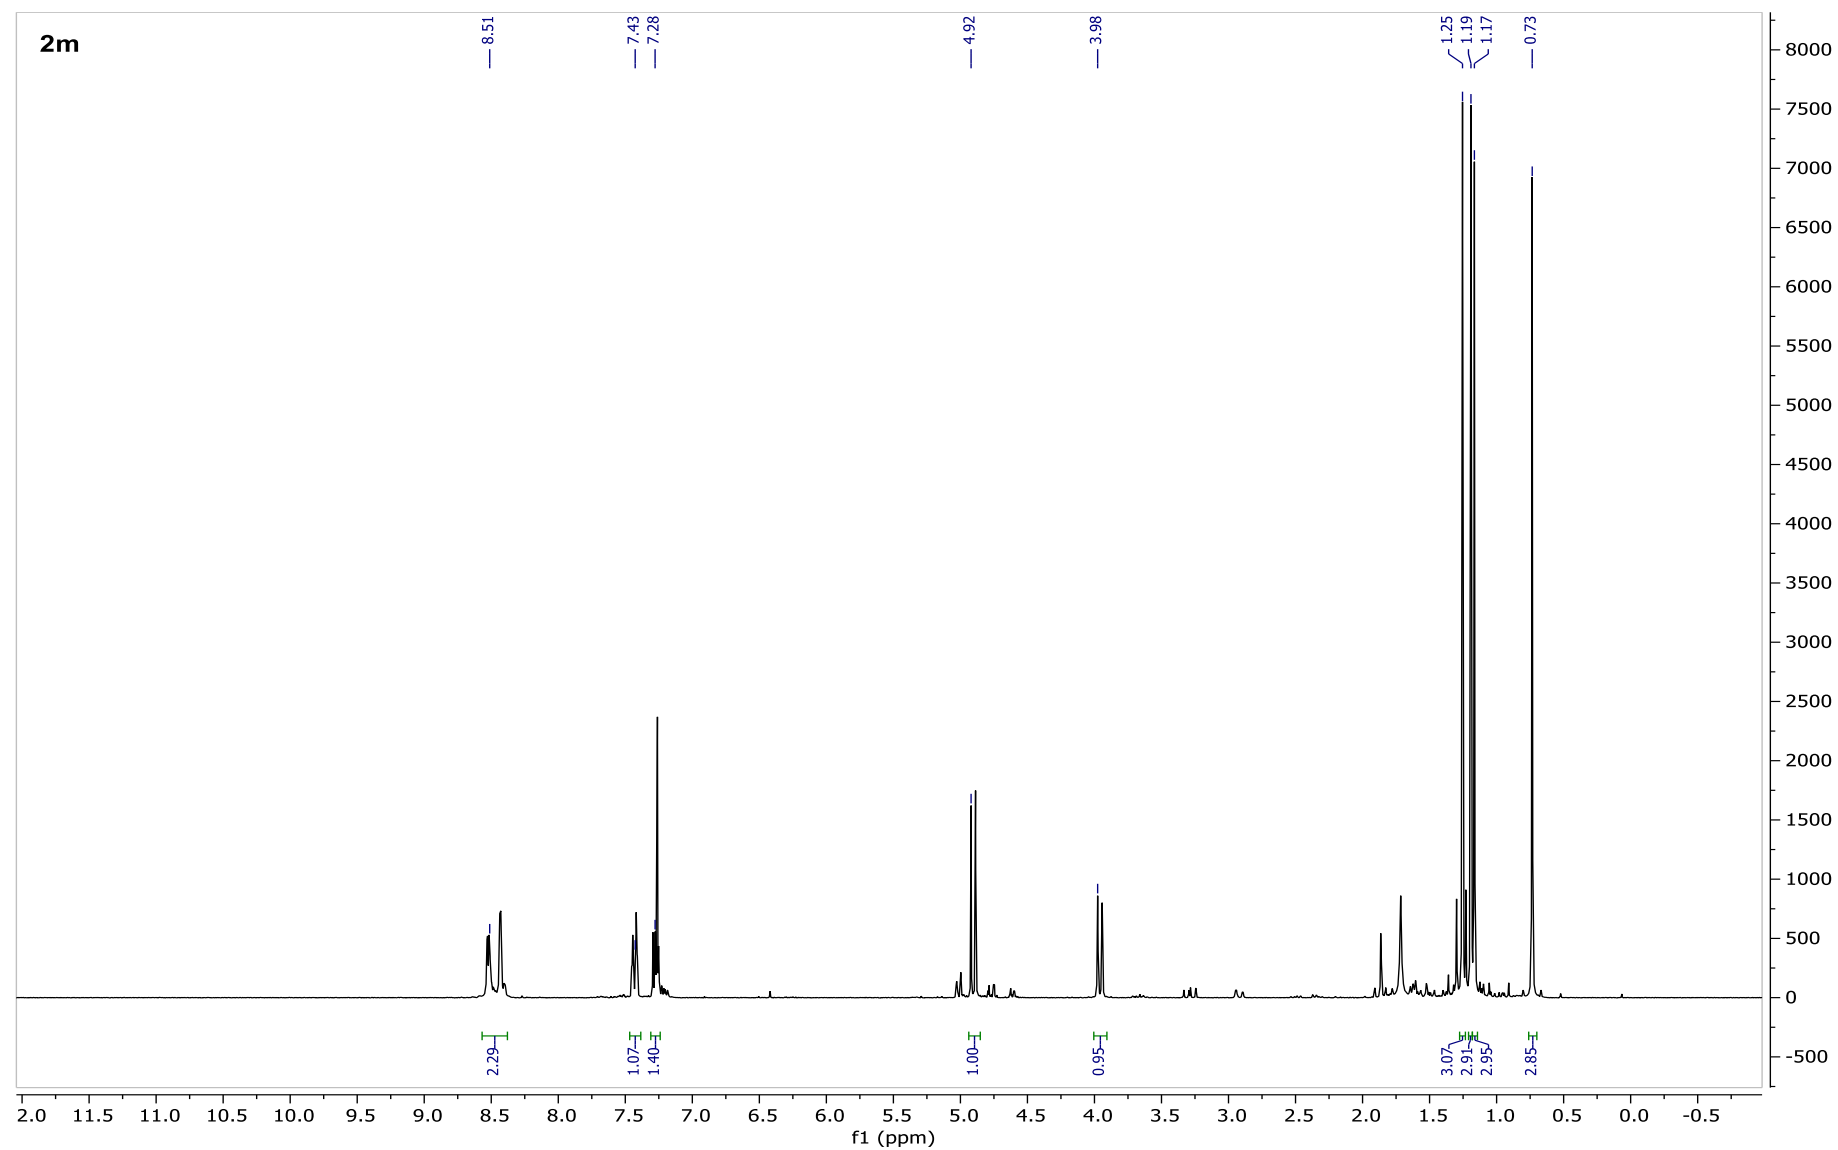

<sup>13</sup>C NMR (75 MHz, CDCl<sub>3</sub>):

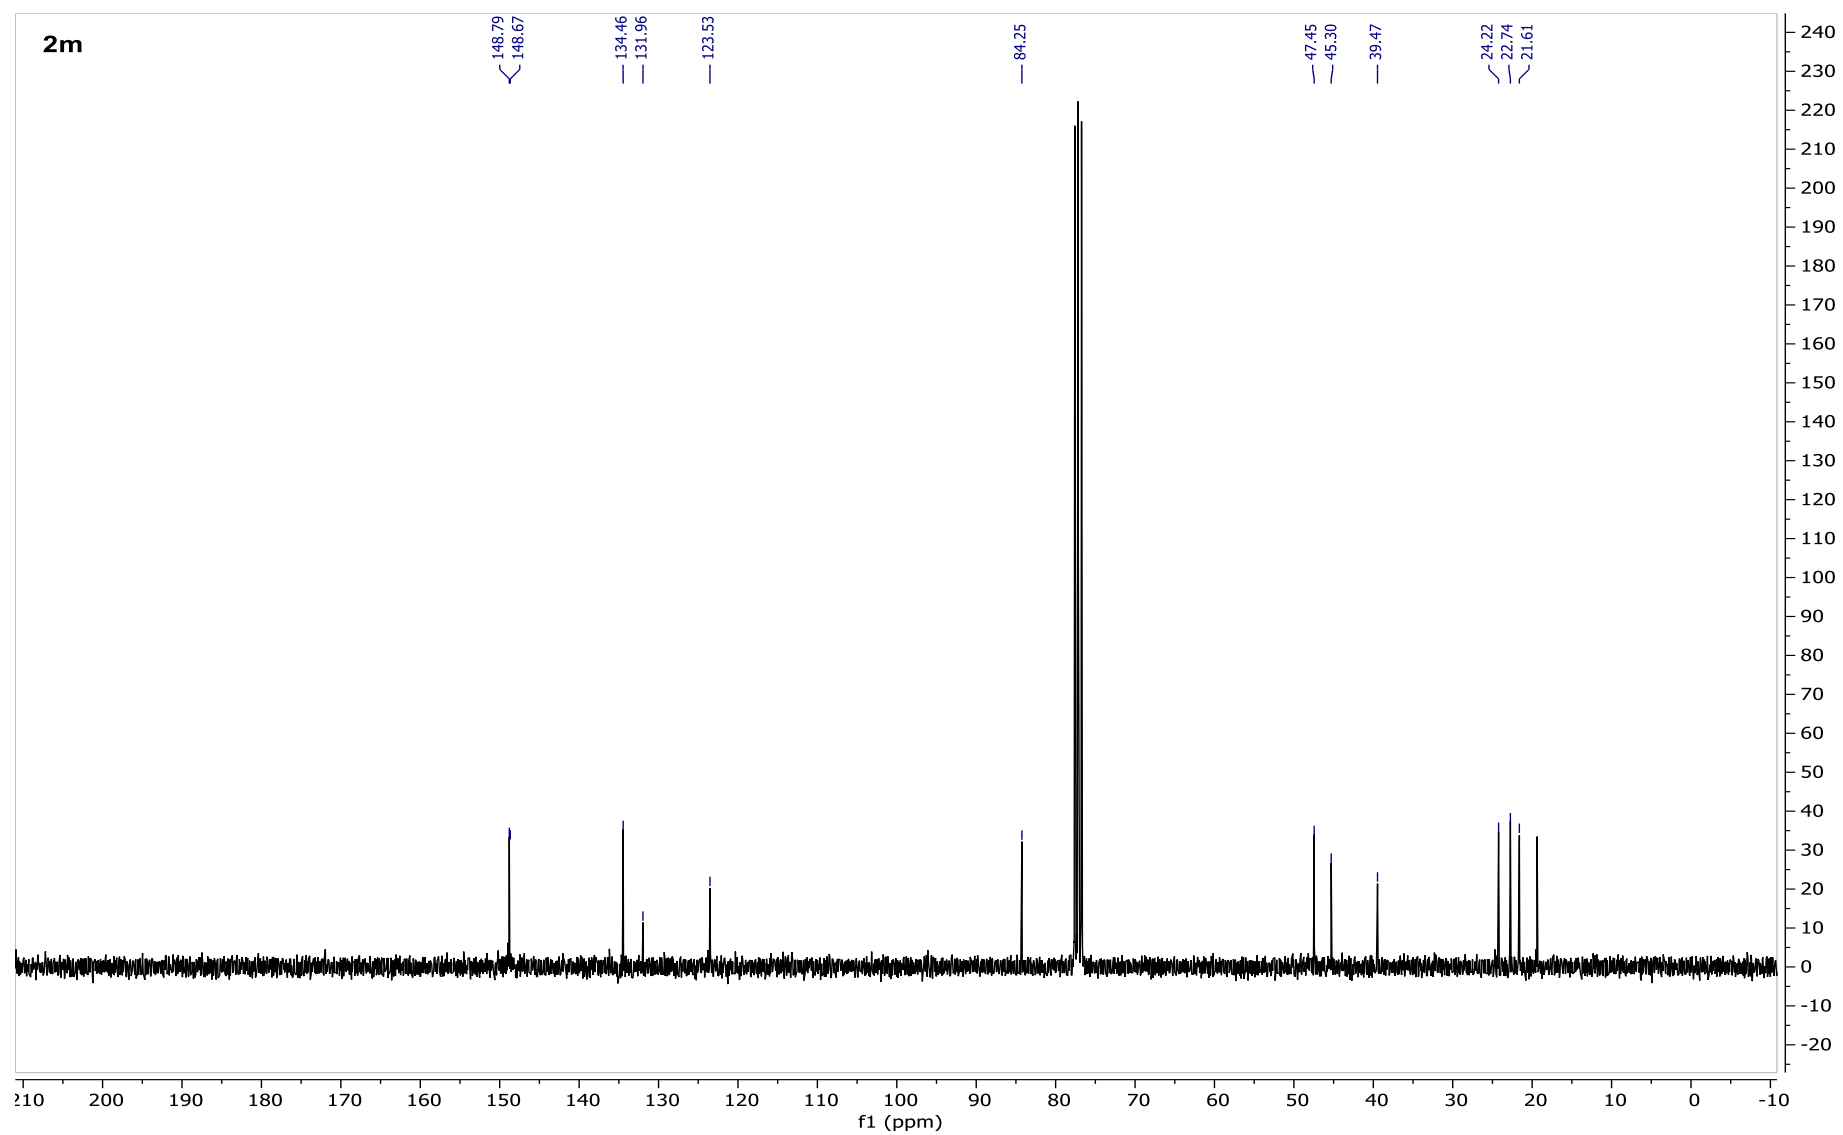

2-(2',2',3',3'-tetramethyl-4'-nitrocyclobutyl)naphthalene (2n):  $^1\text{H}$  NMR (500 MHz,  $\text{CDCl}_3$ ):

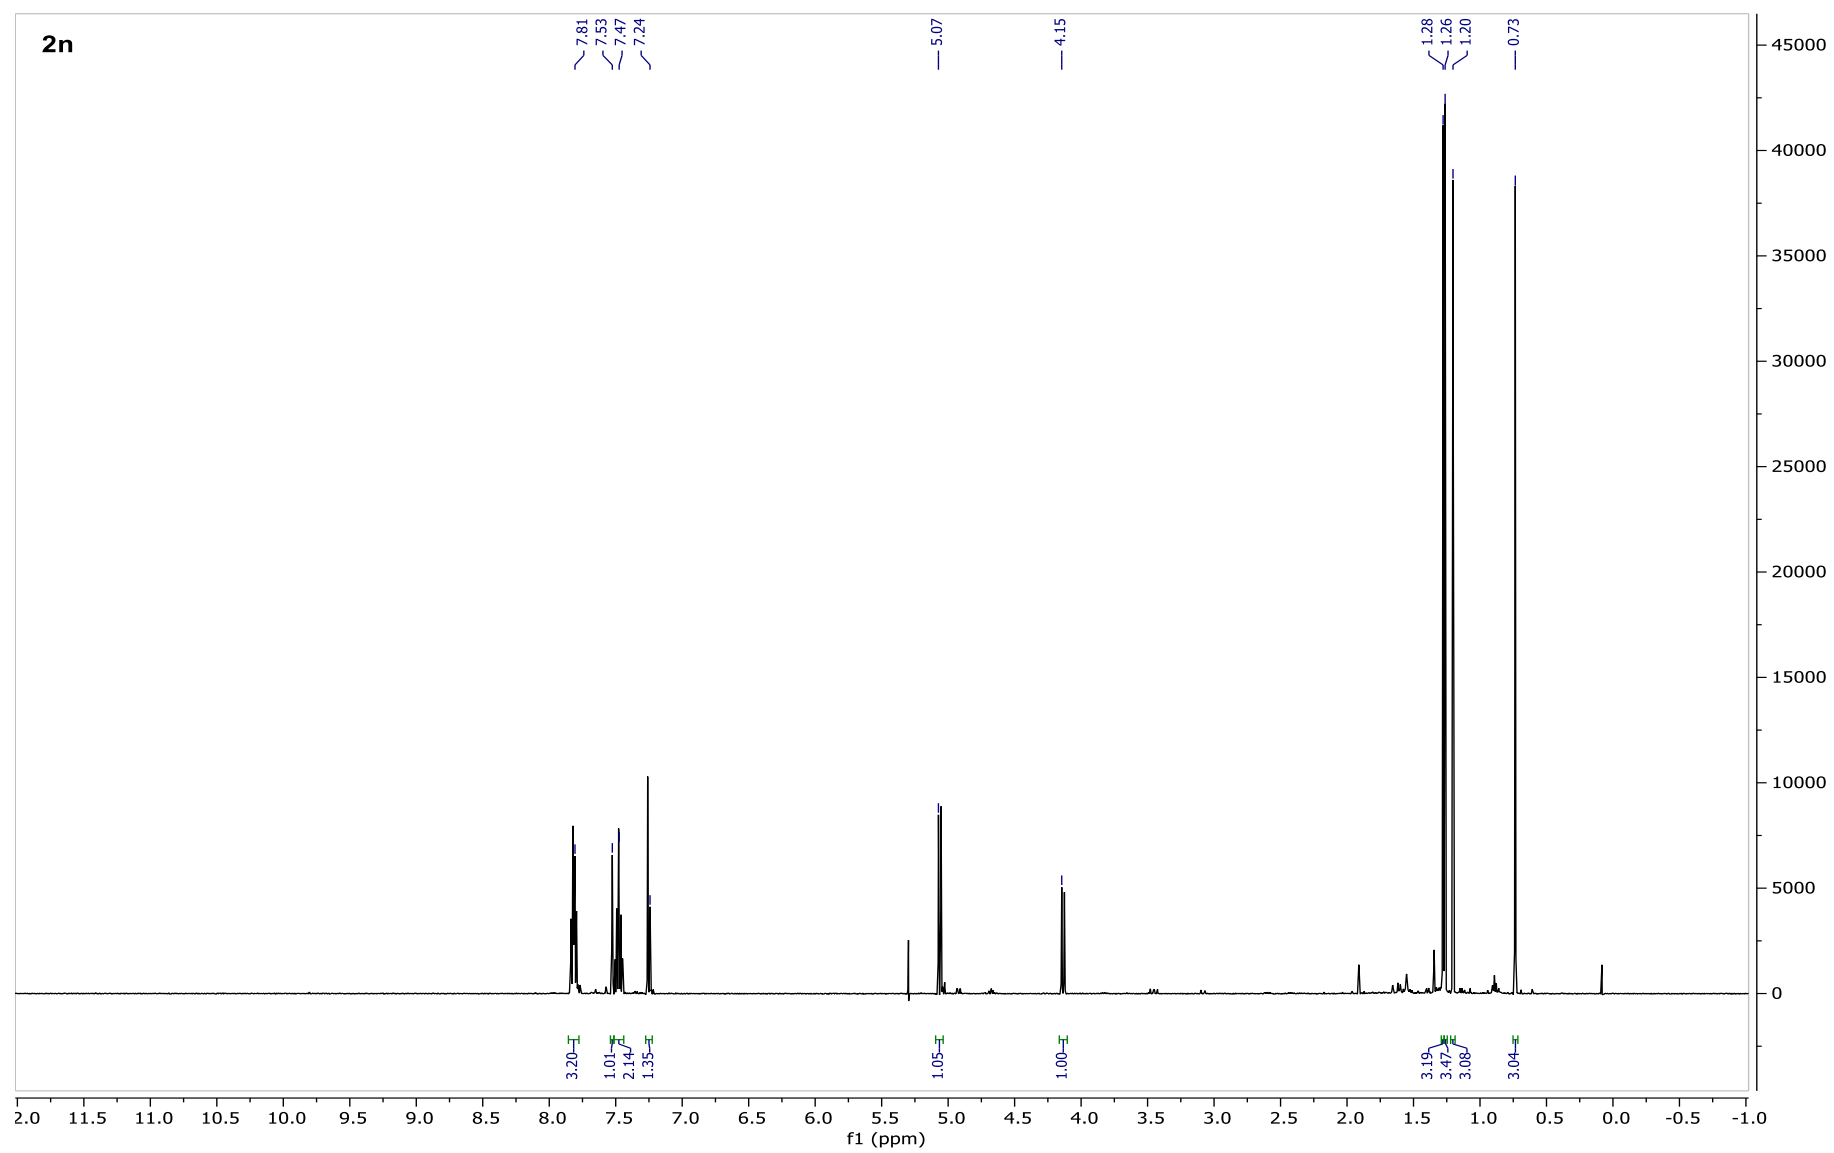

$^{13}\text{C}$  NMR (101 MHz,  $\text{CDCl}_3$ ):

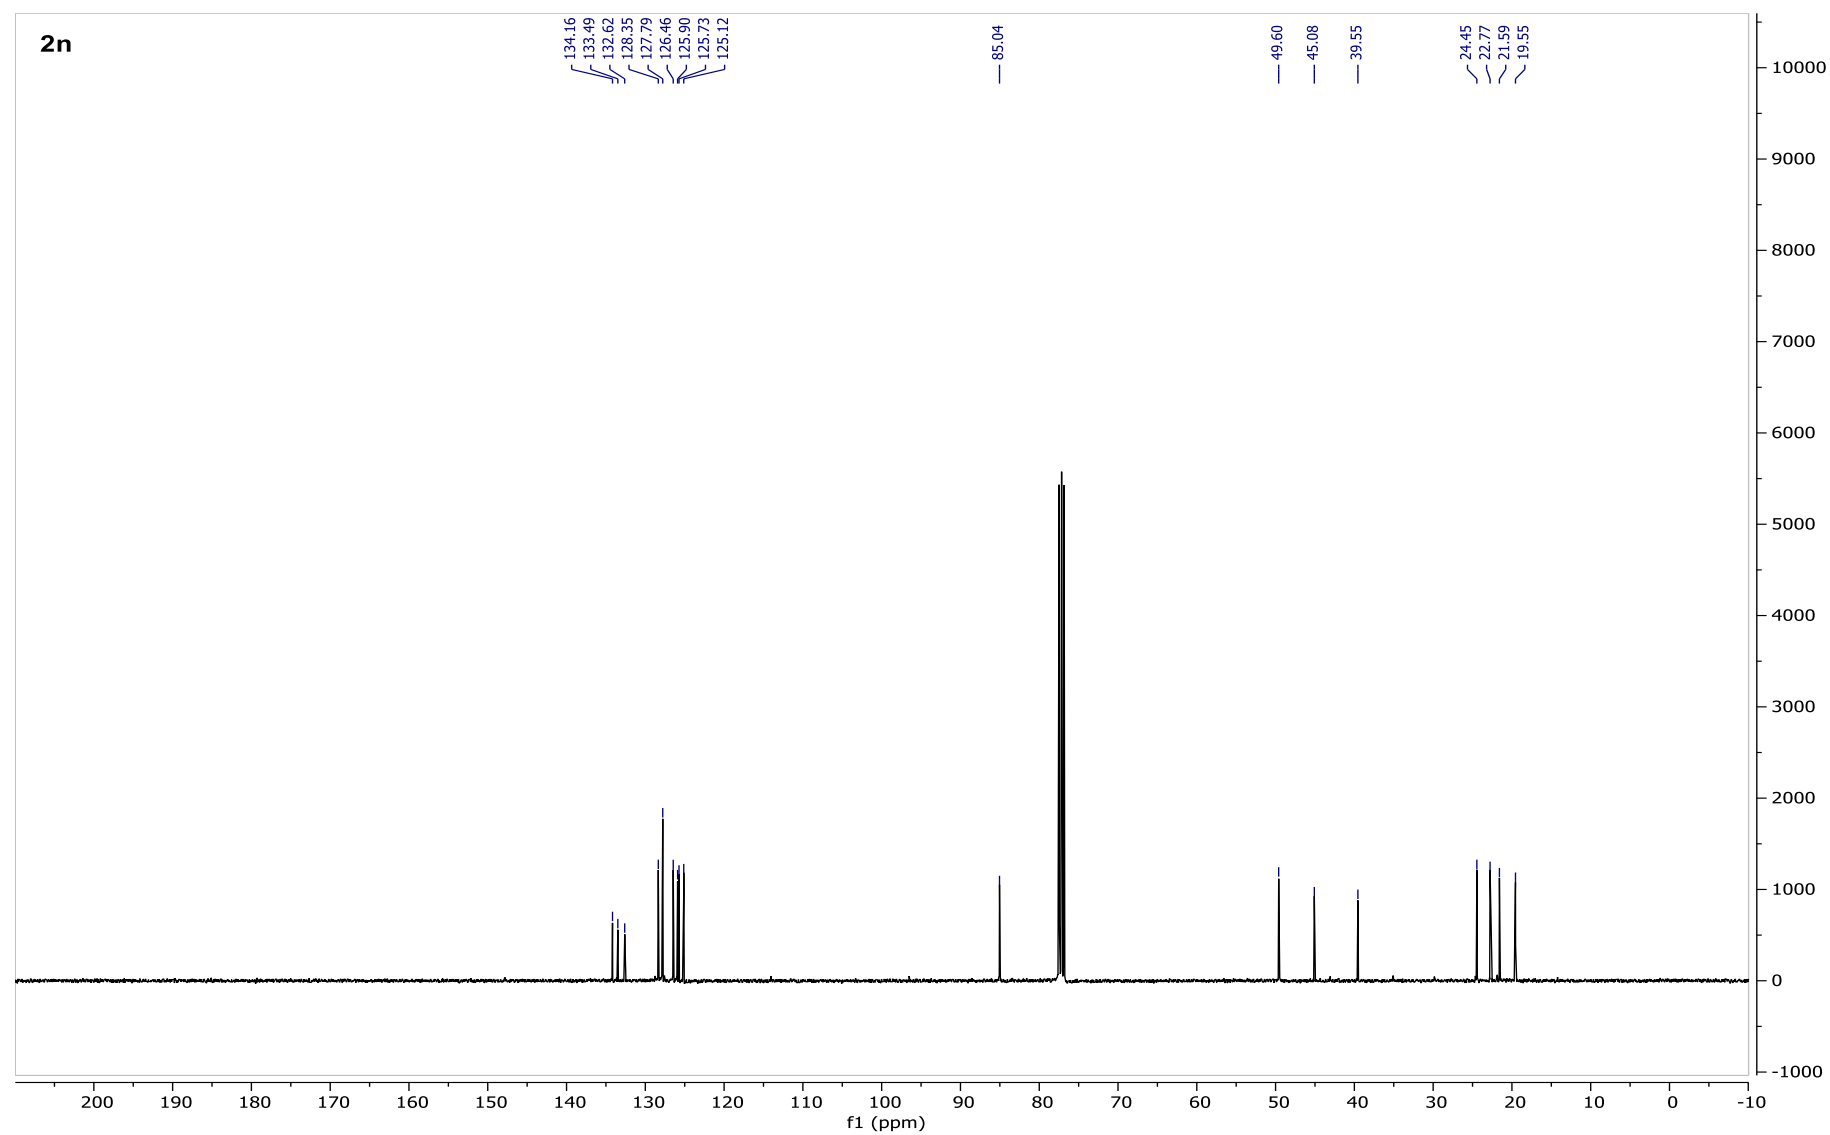

1-(pent-4'-en-1'-yl)-2-(2'',2'',3'',3''-tetramethyl-4''-nitrocyclobutyl)-benzene (2o): <sup>1</sup>H NMR (500 MHz, CDCl<sub>3</sub>):

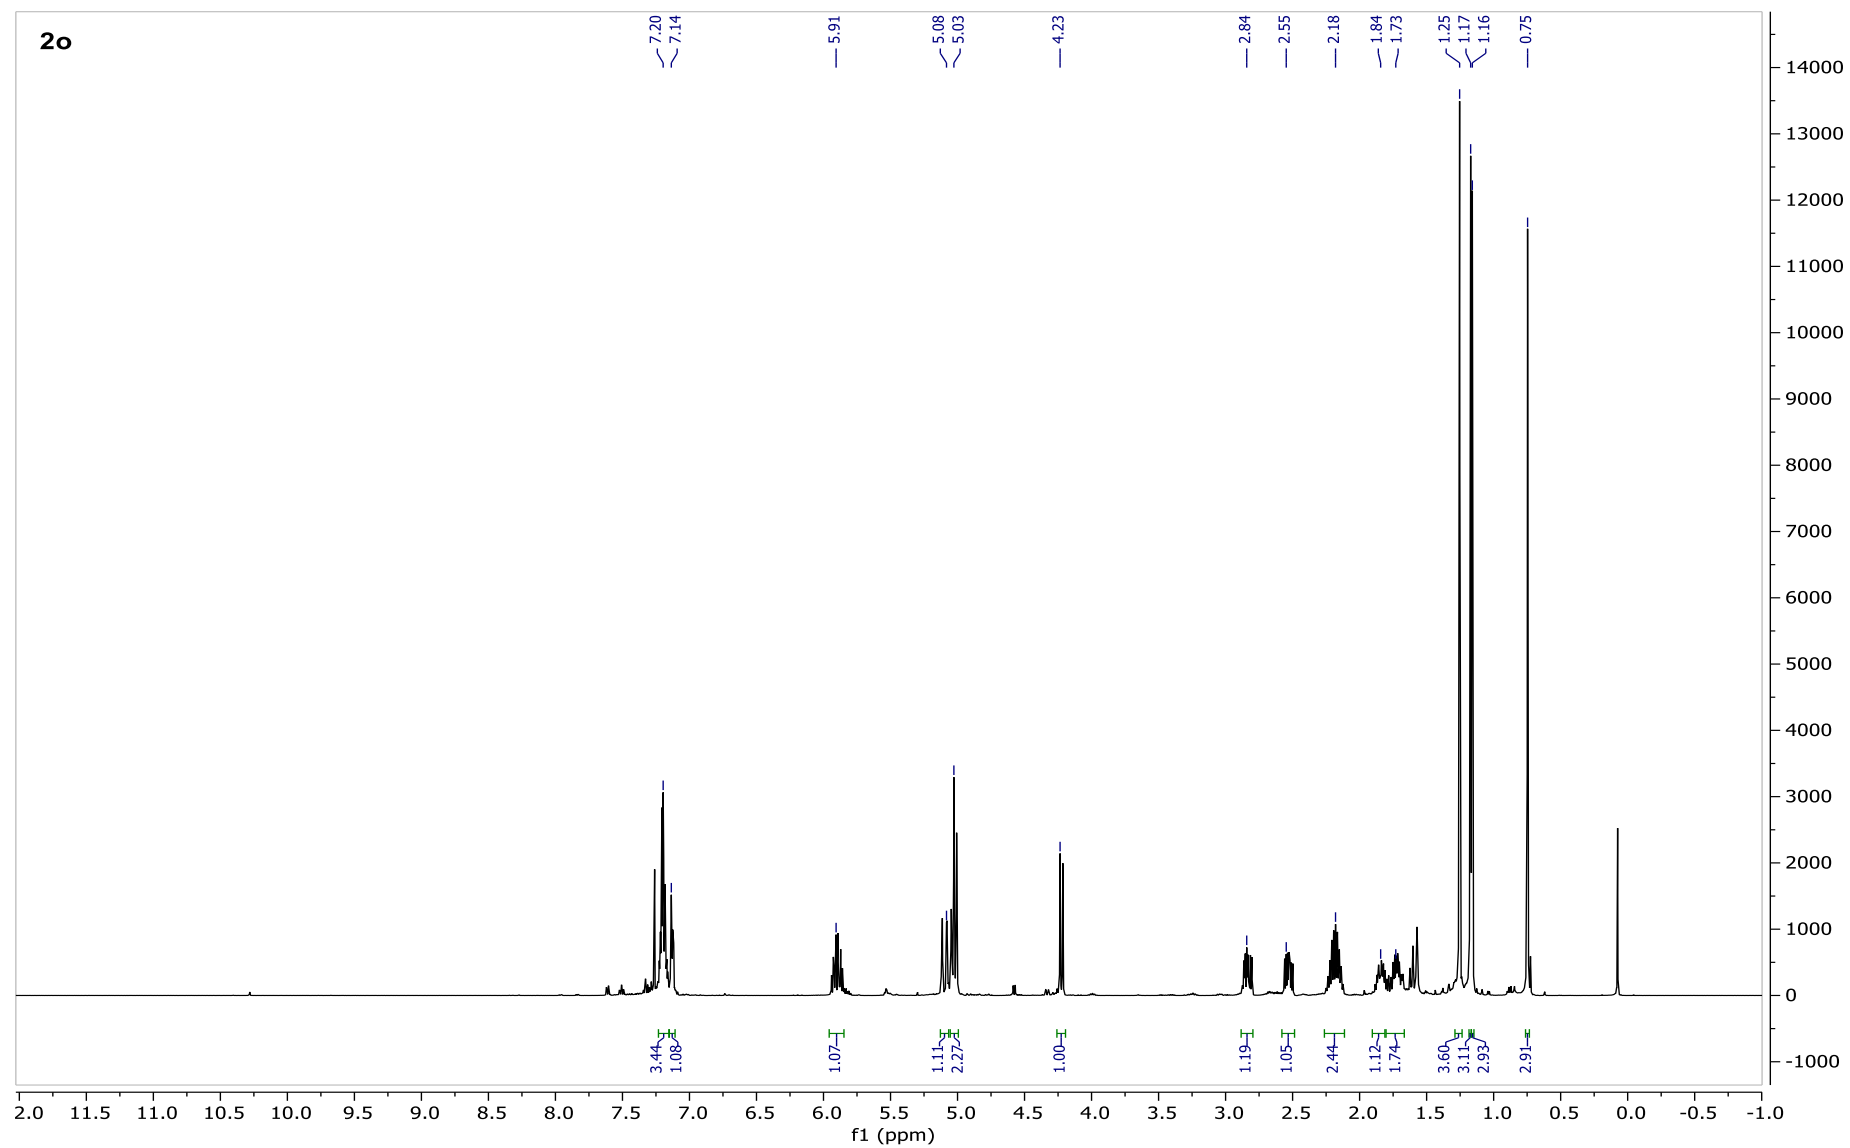



<sup>13</sup>C NMR (126 MHz, CDCl<sub>3</sub>):

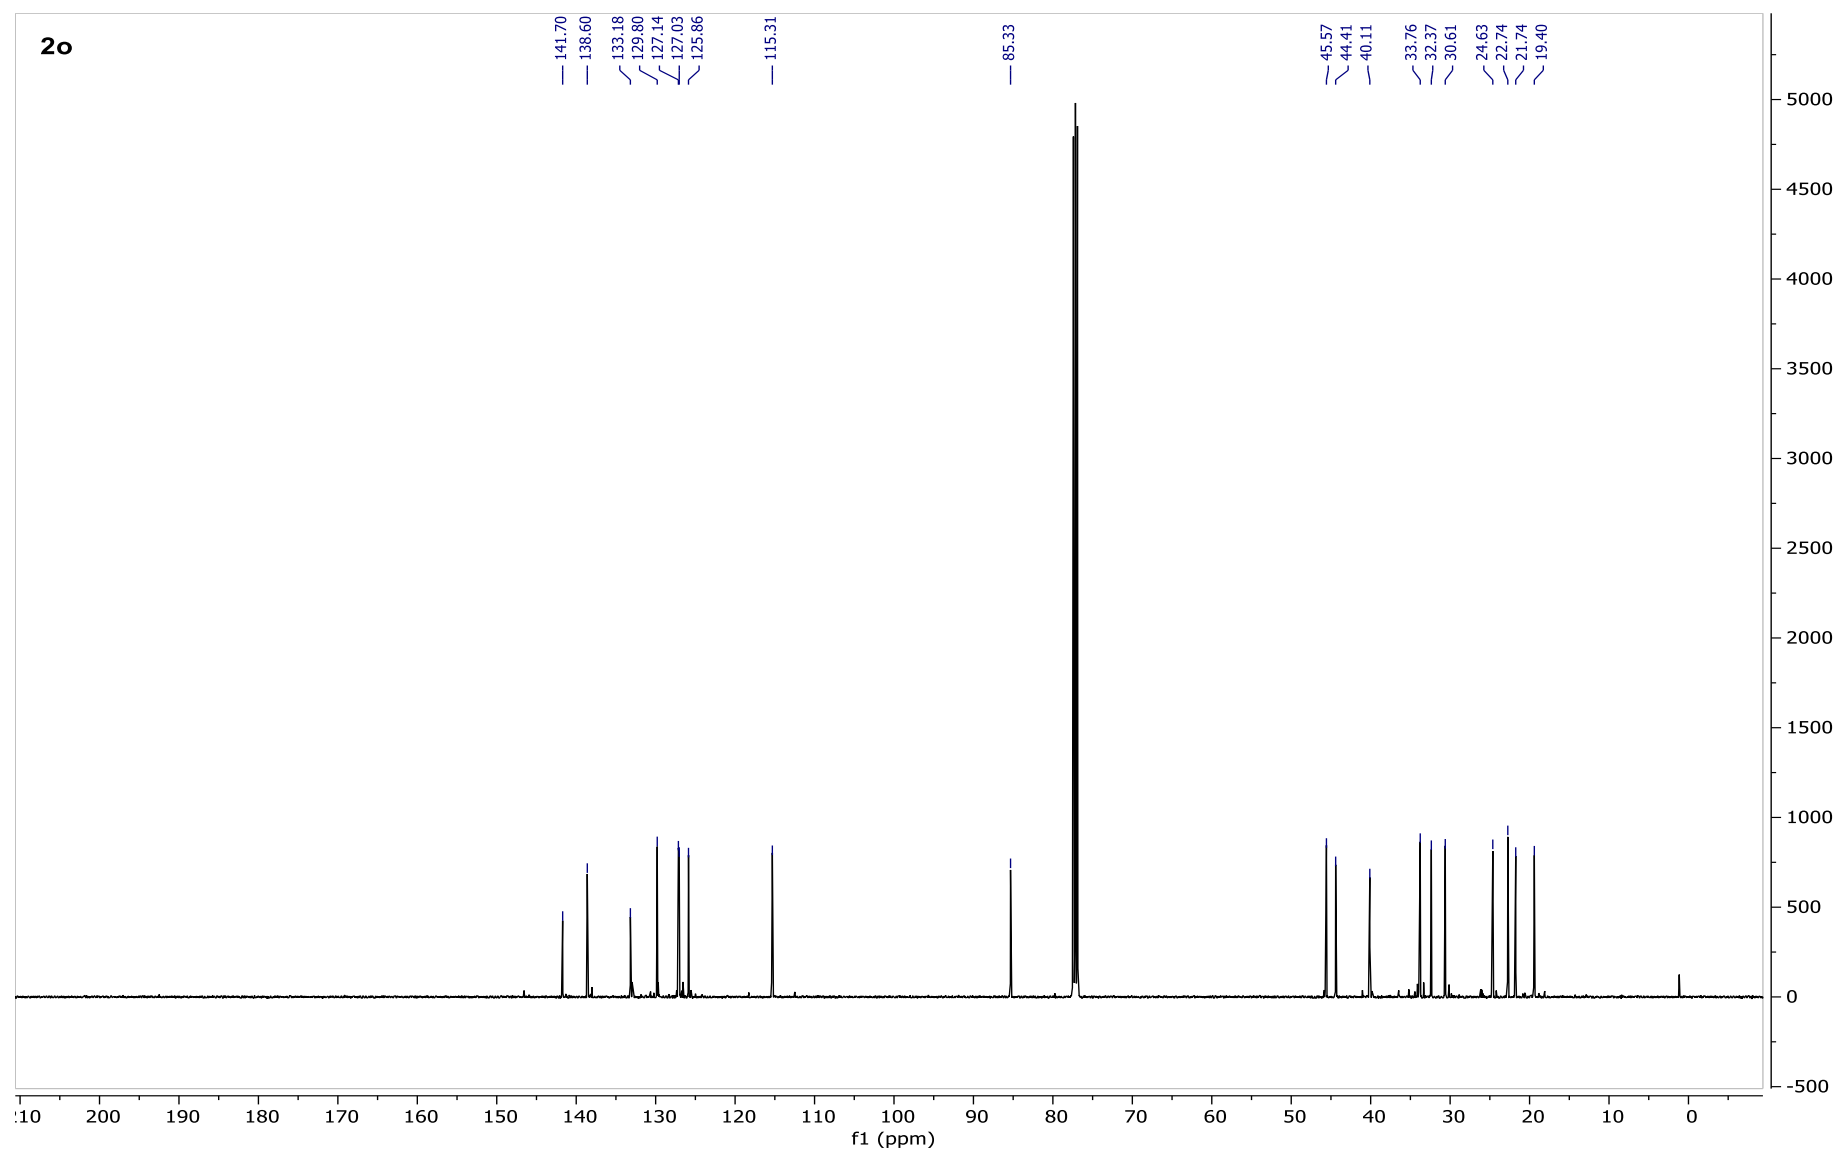

(2',2'-Diethyl-4'-nitrocyclobutyl)benzene (3c):  $^1\text{H}$  NMR (500 MHz,  $\text{CDCl}_3$ ):

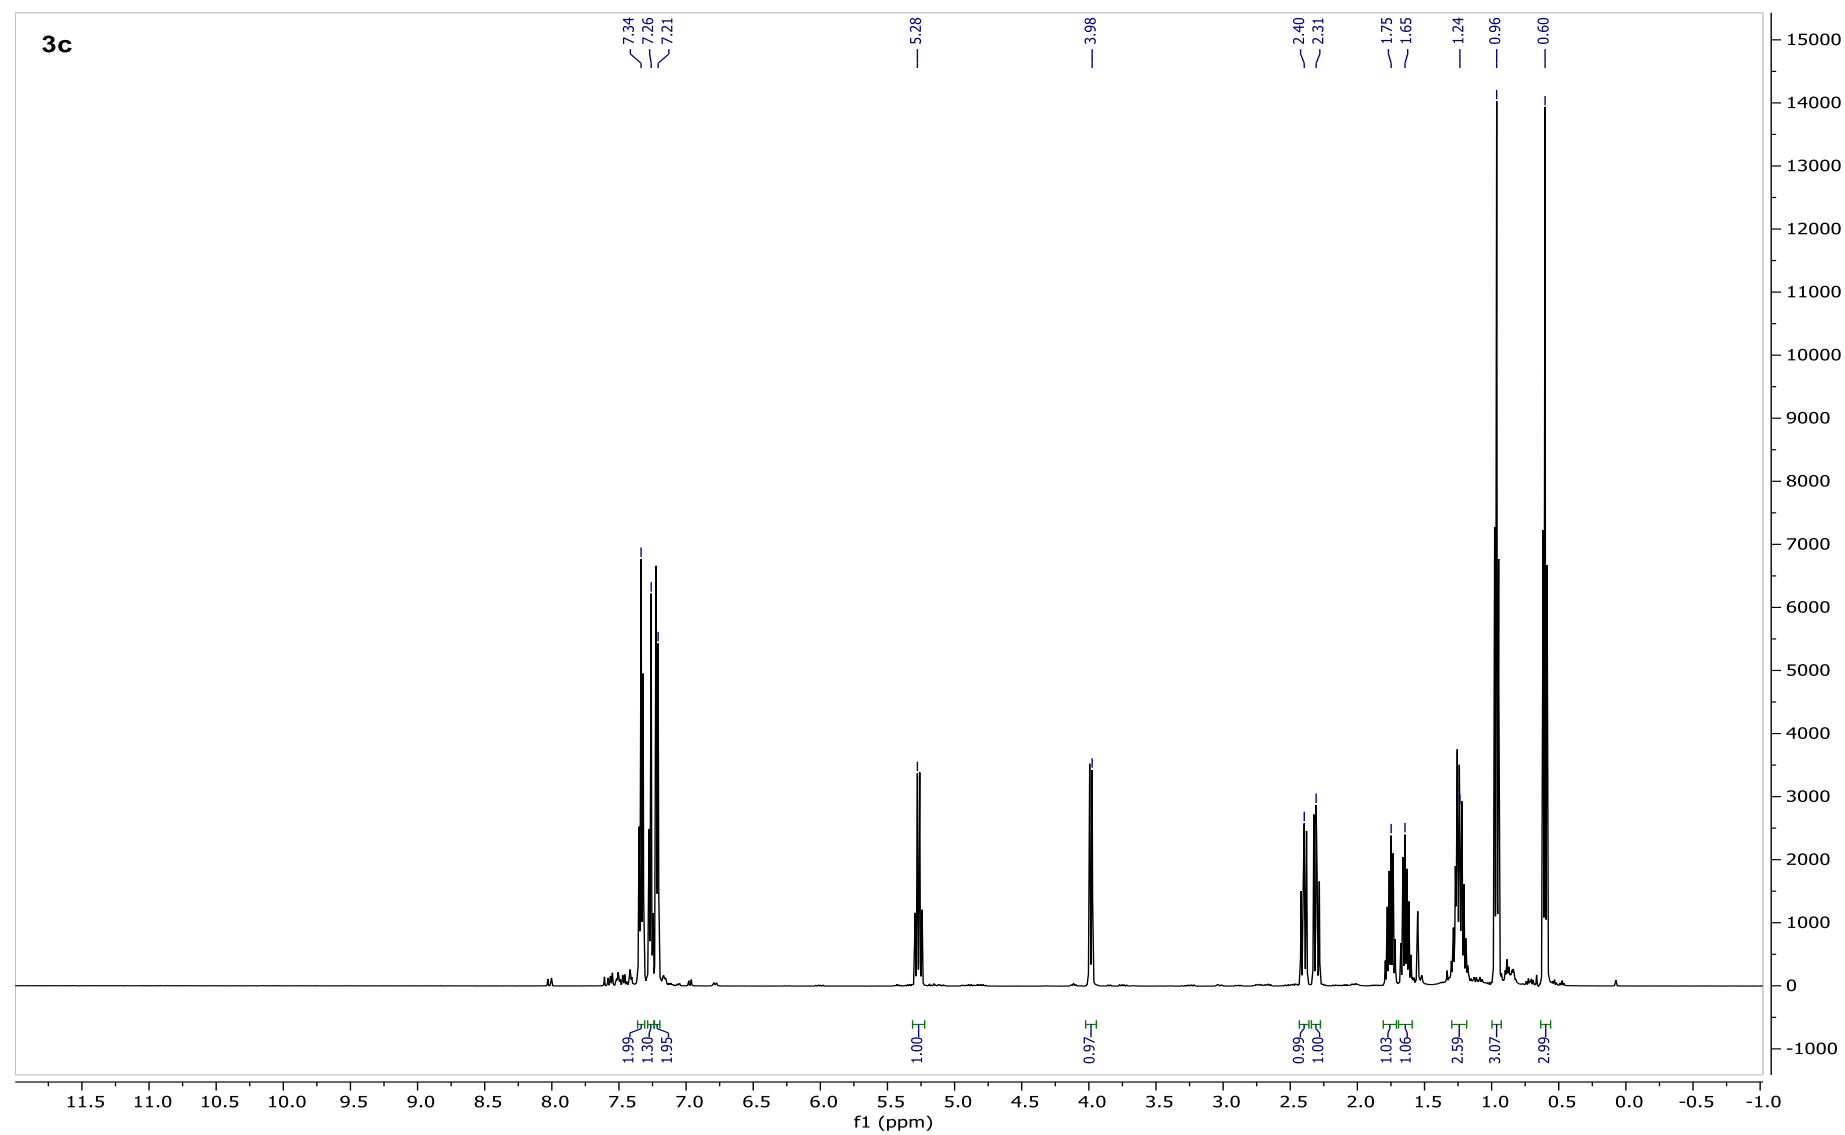

<sup>13</sup>C NMR (126 MHz, CDCl<sub>3</sub>):

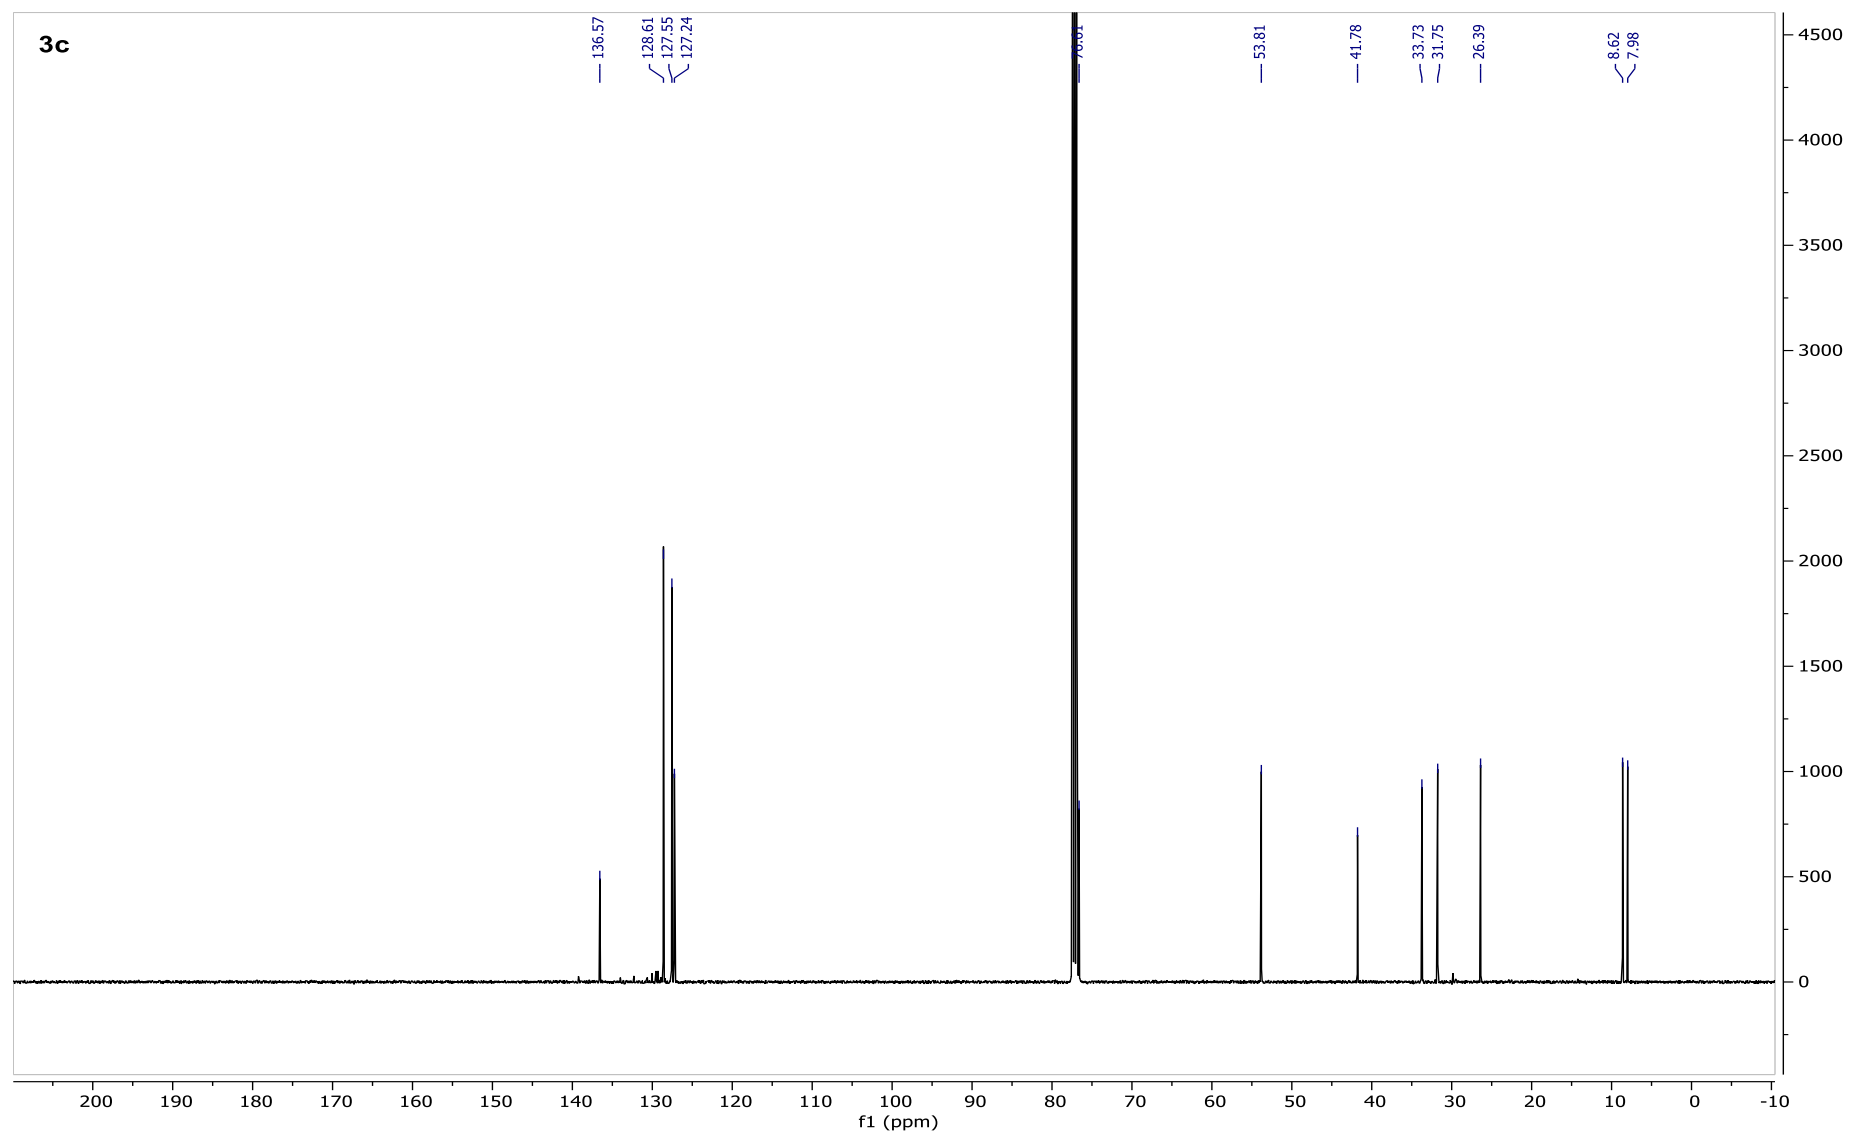

1-Nitro-2-phenyl-1,2,2a,7b-tetrahydrocyclobuta[b]benzofuran (3d):  $^1\text{H}$  NMR (500 MHz,  $\text{C}_6\text{D}_6$ ):

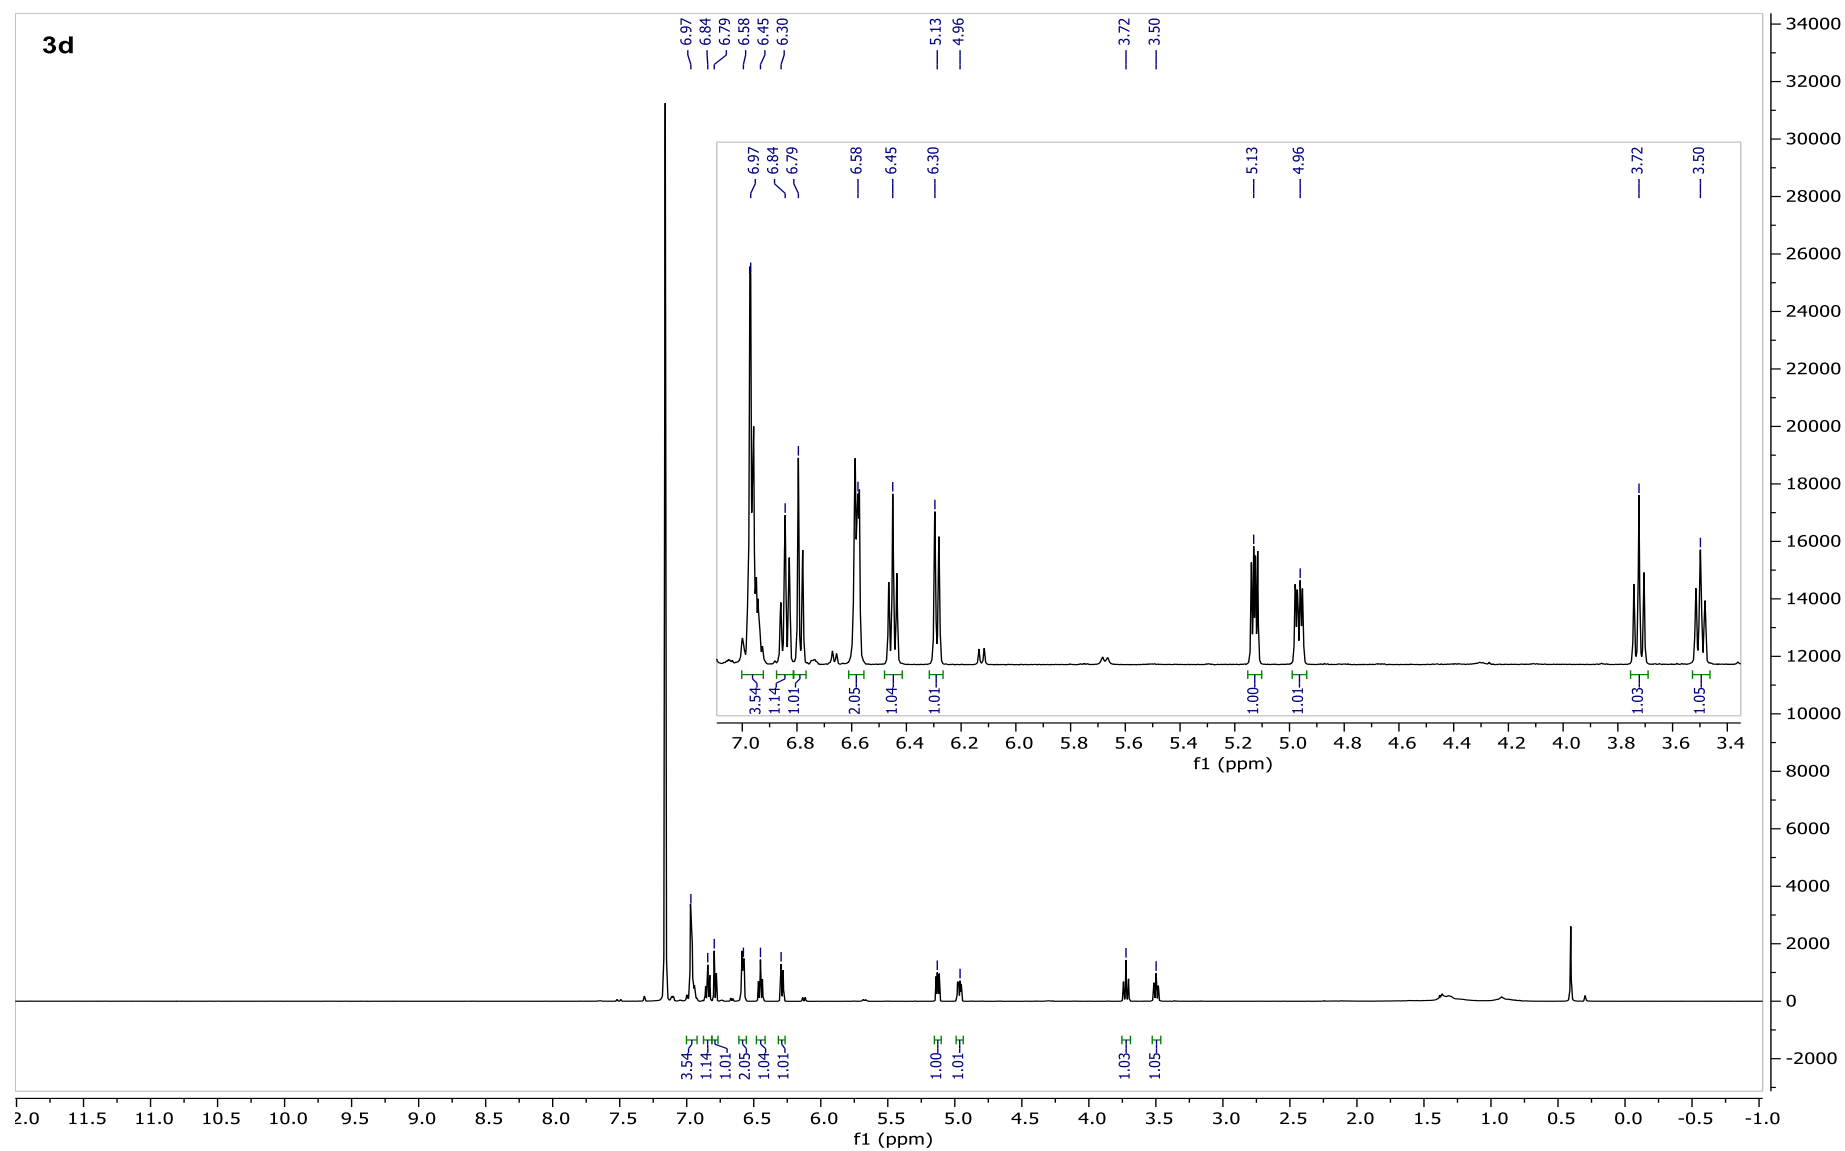

$^{13}\text{C}$  NMR (101 MHz,  $\text{C}_6\text{D}_6$ ):

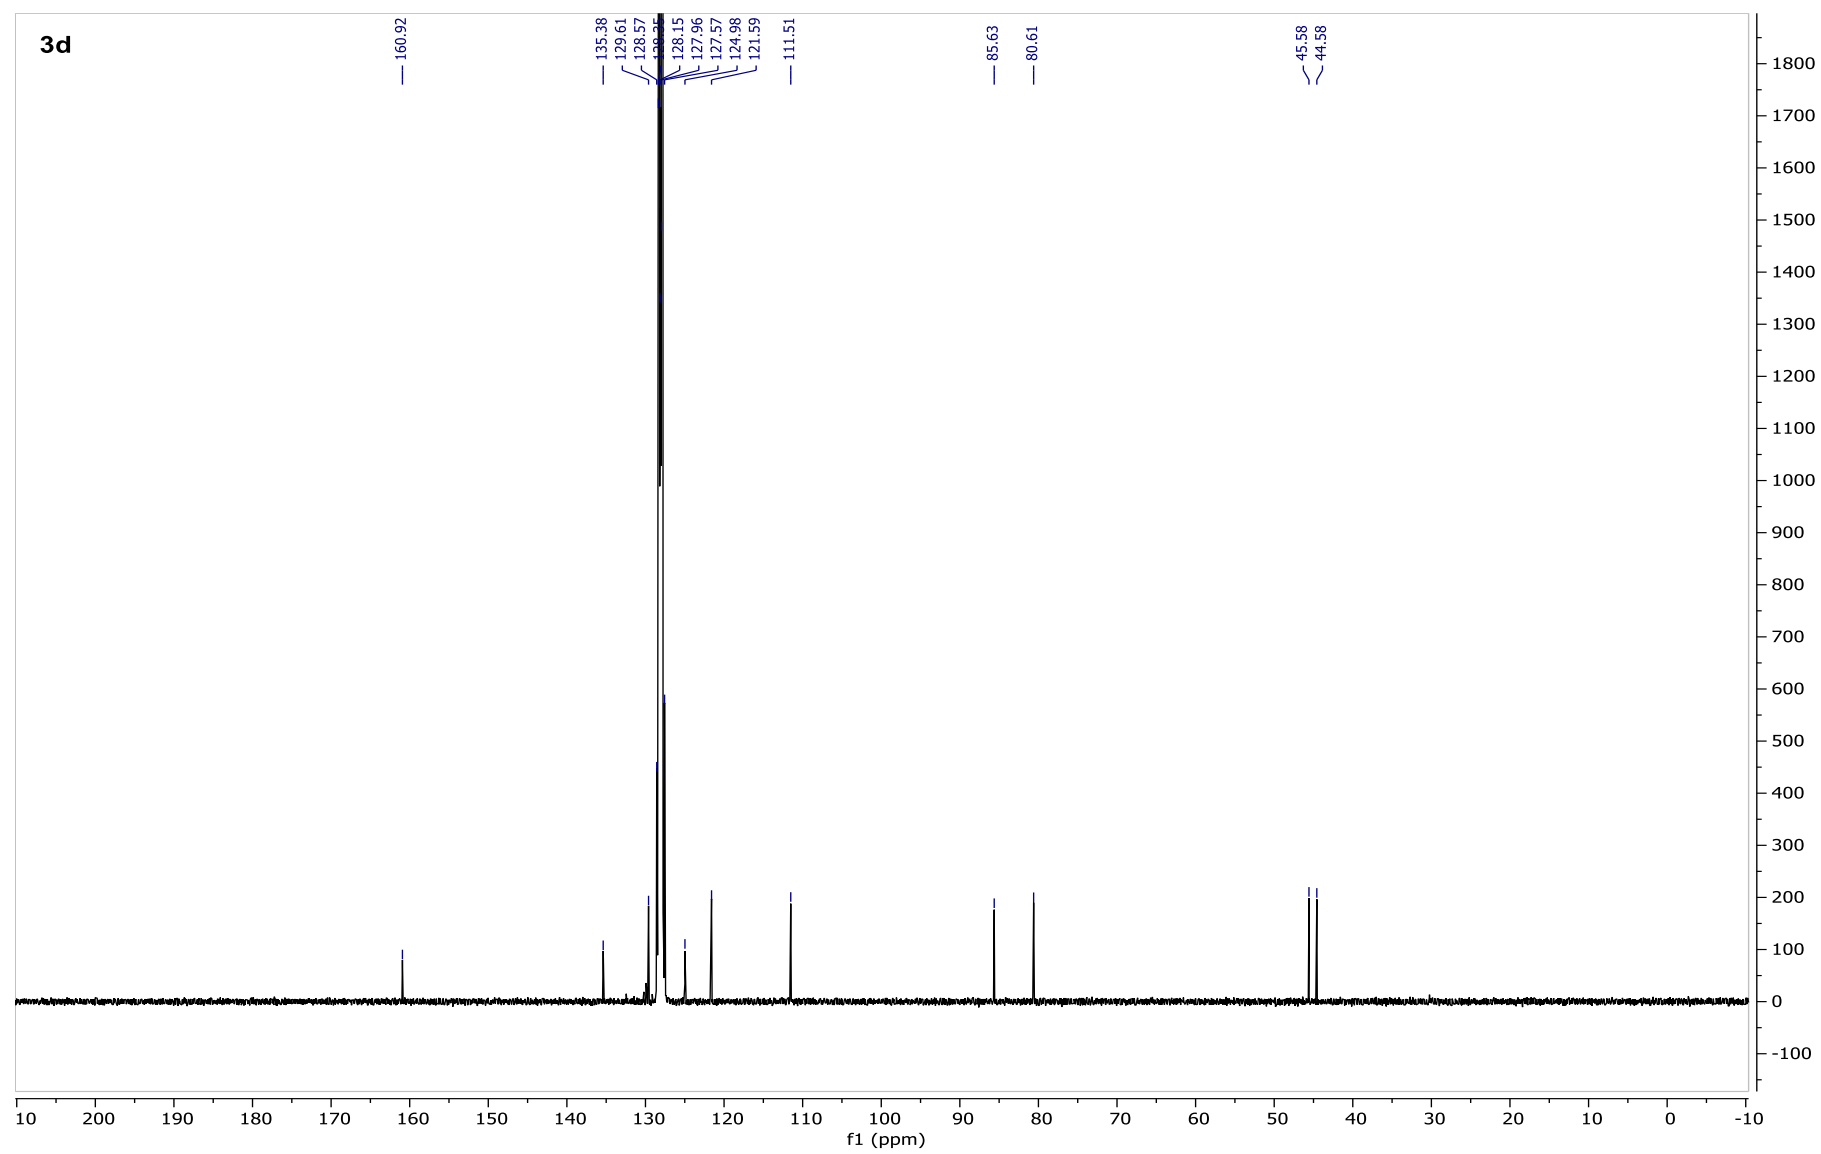

7-Nitro-8-phenyl-2,5-dioxabicyclo[4.2.0]octane (**3e**):  $^1\text{H}$  NMR (400 MHz,  $\text{C}_6\text{D}_6$ ):

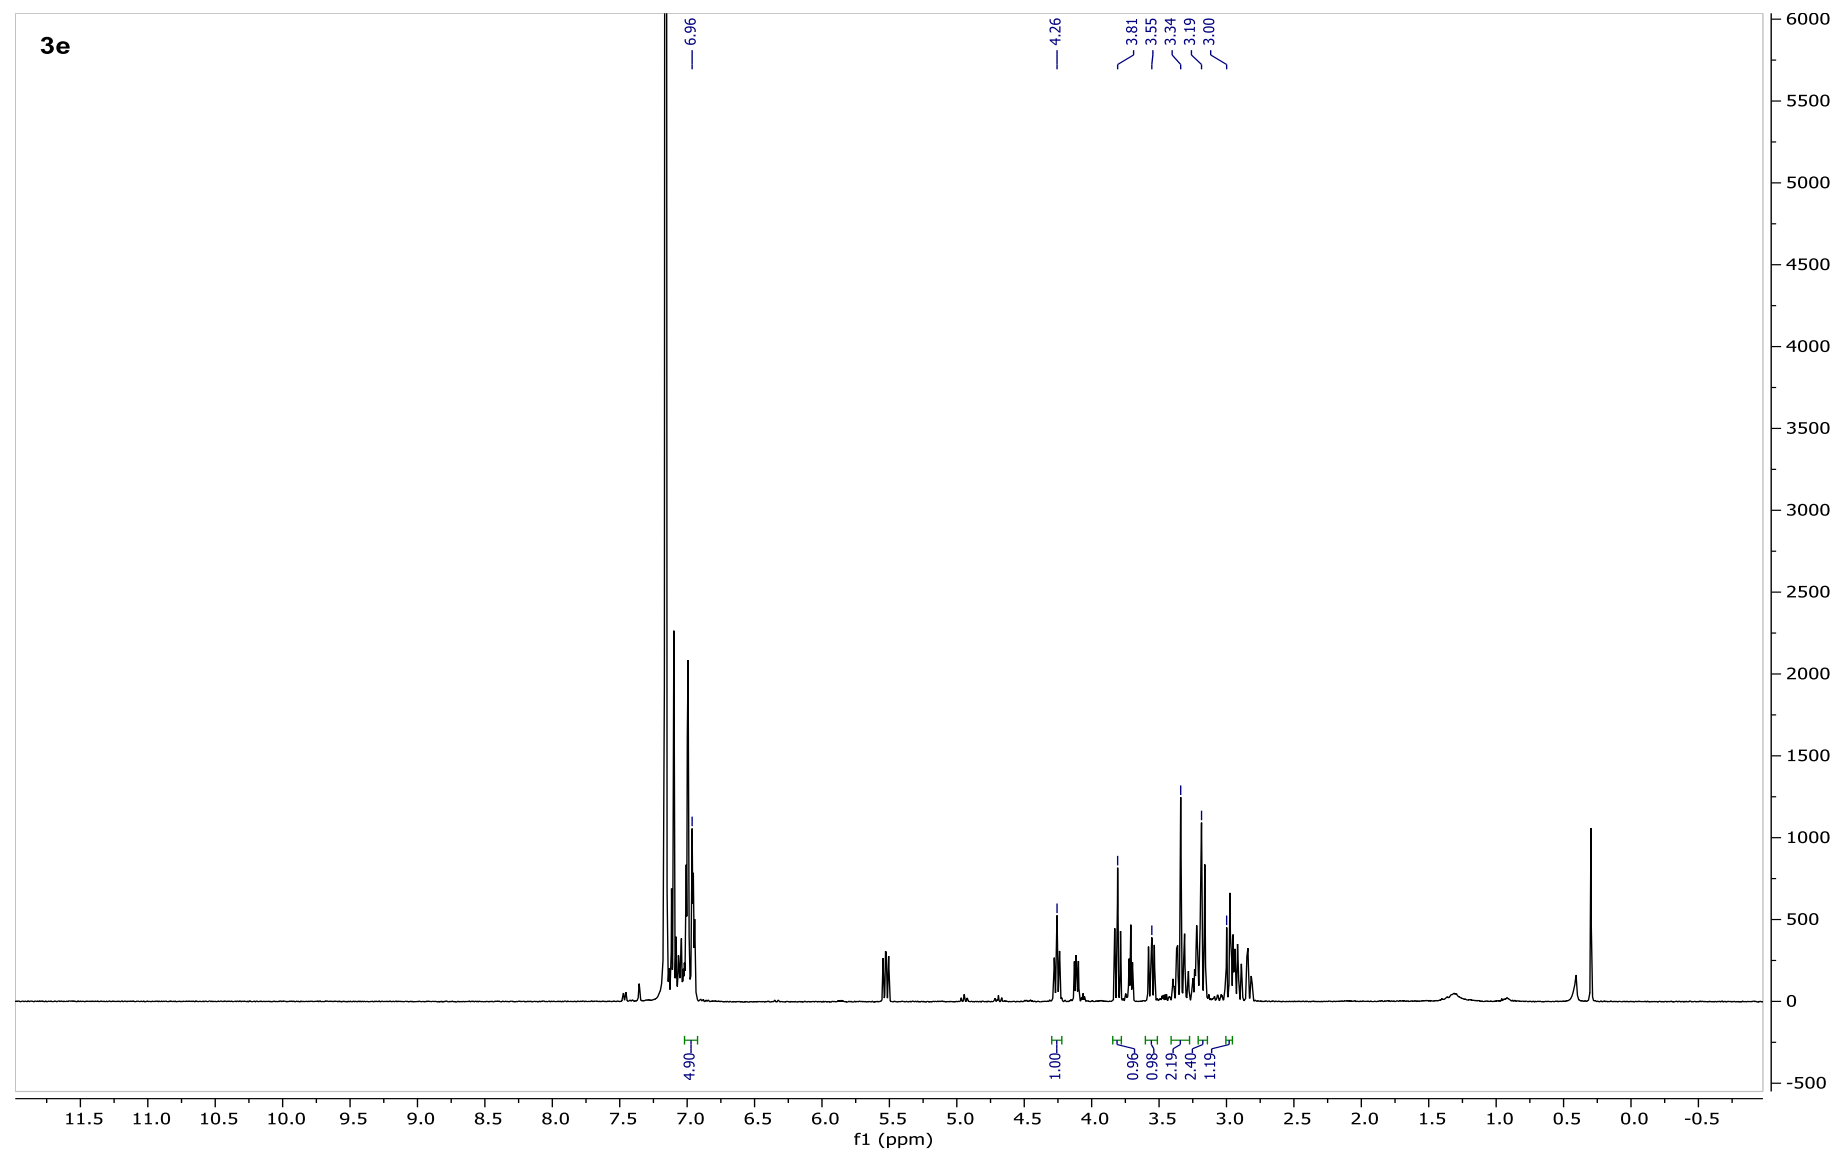

<sup>13</sup>C NMR (101 MHz, C<sub>6</sub>D<sub>6</sub>):

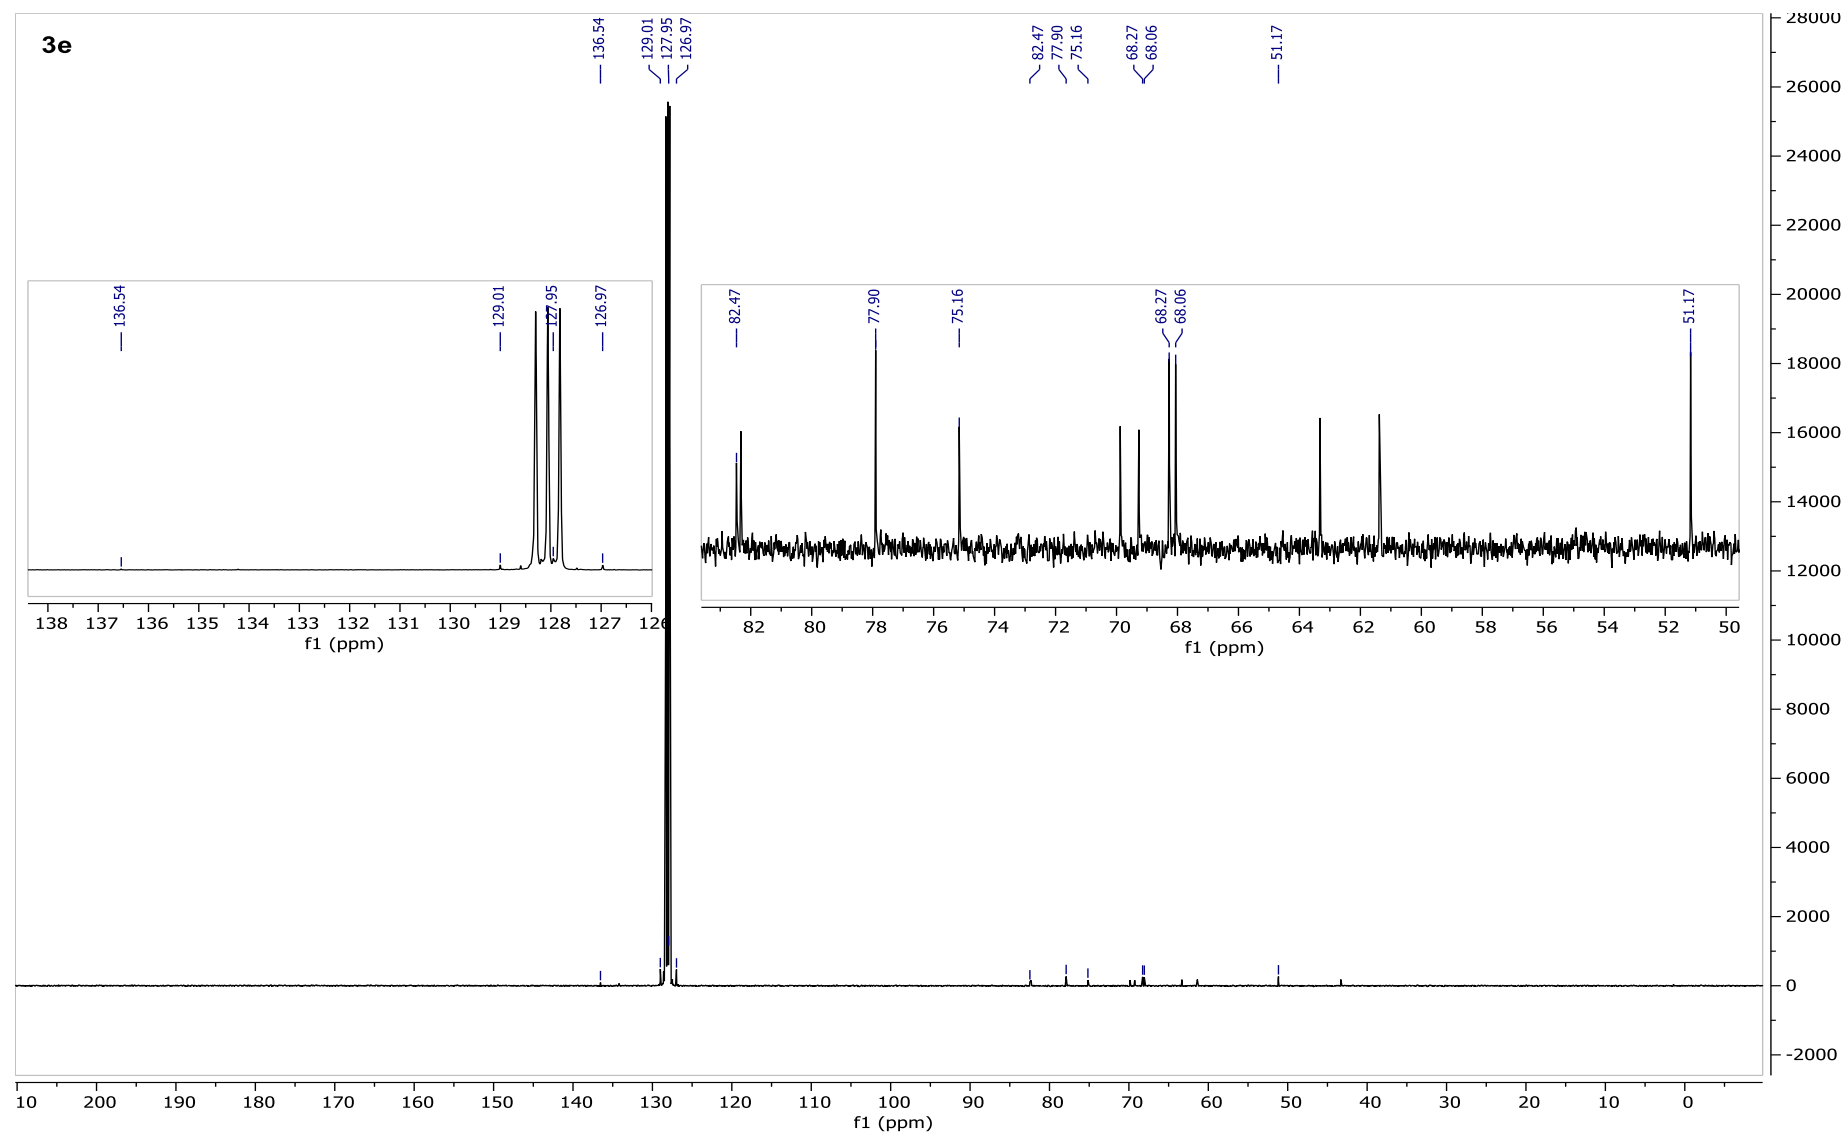

3e':  $^1\text{H}$  NMR (400 MHz,  $\text{C}_6\text{D}_6$ ):

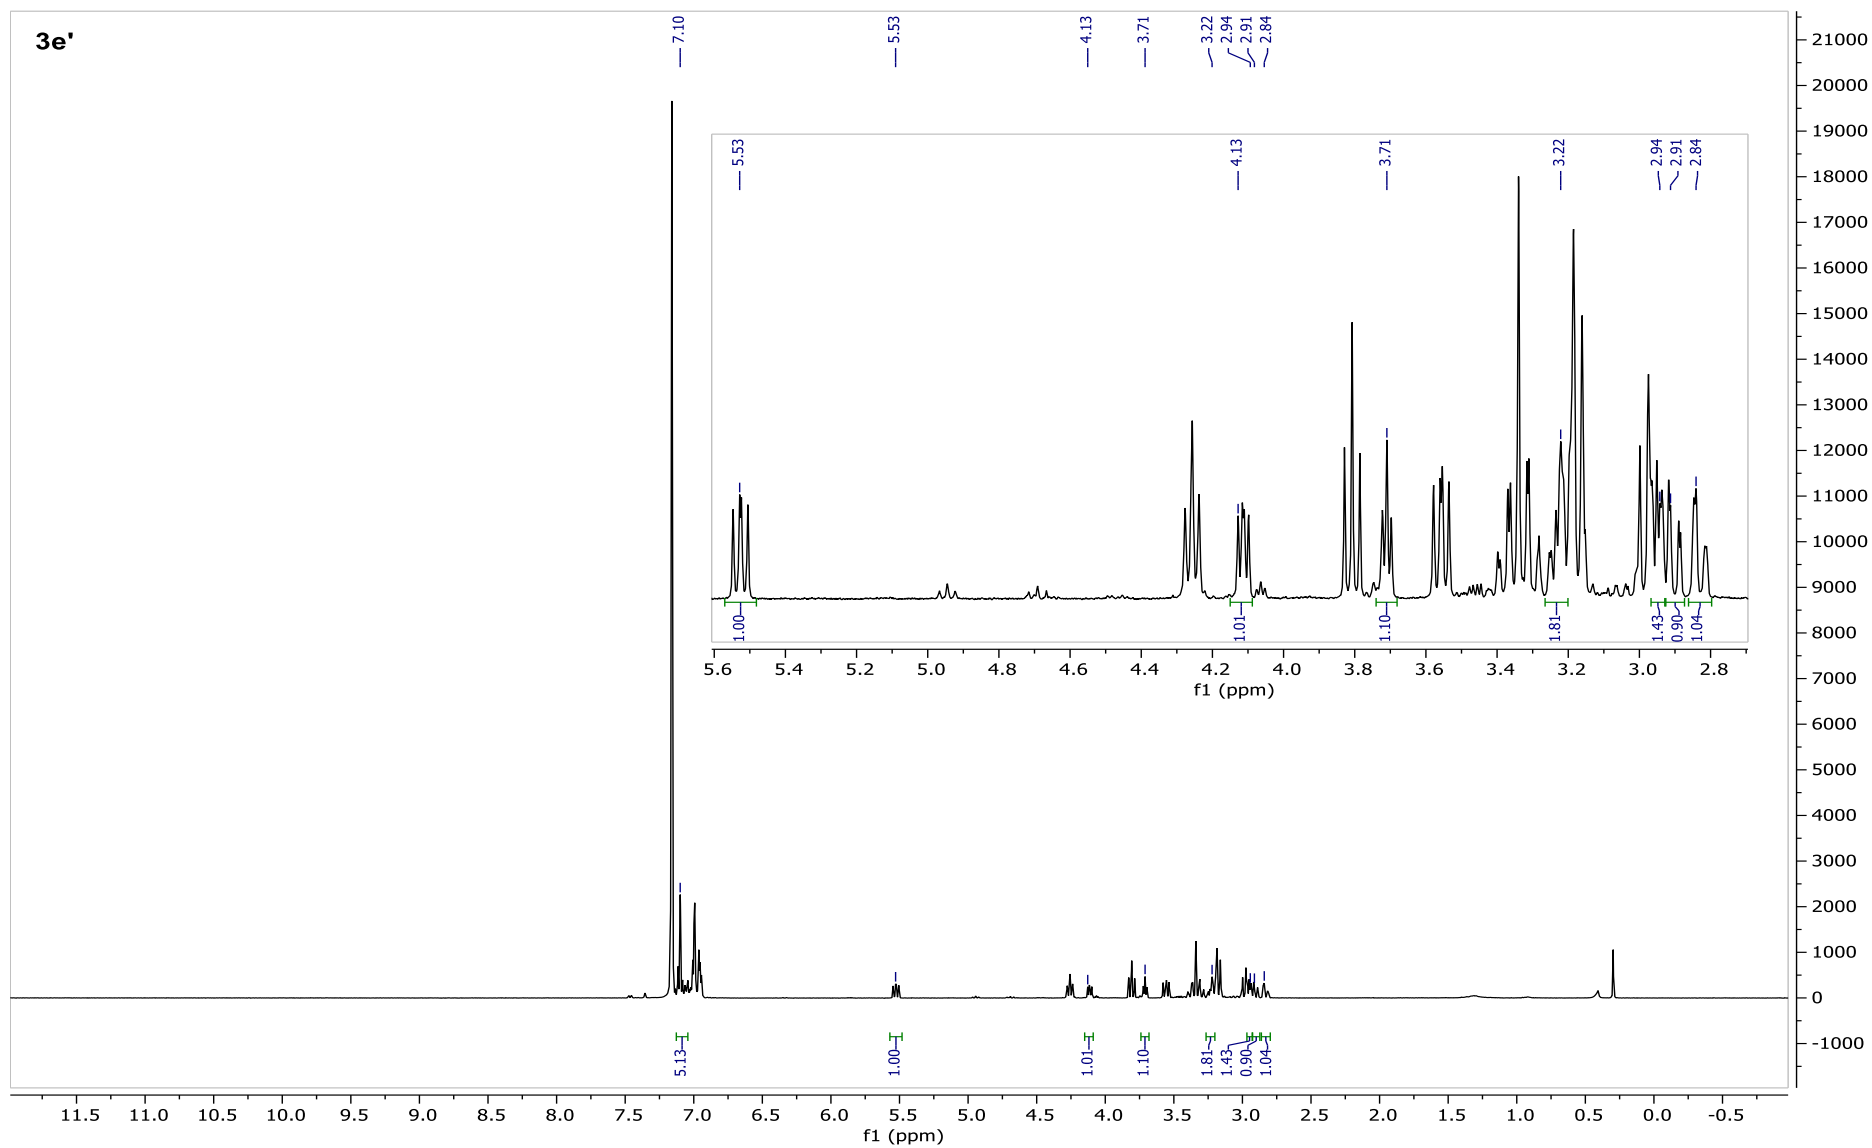



$^{13}\text{C}$  NMR (101 MHz,  $\text{C}_6\text{D}_6$ ):

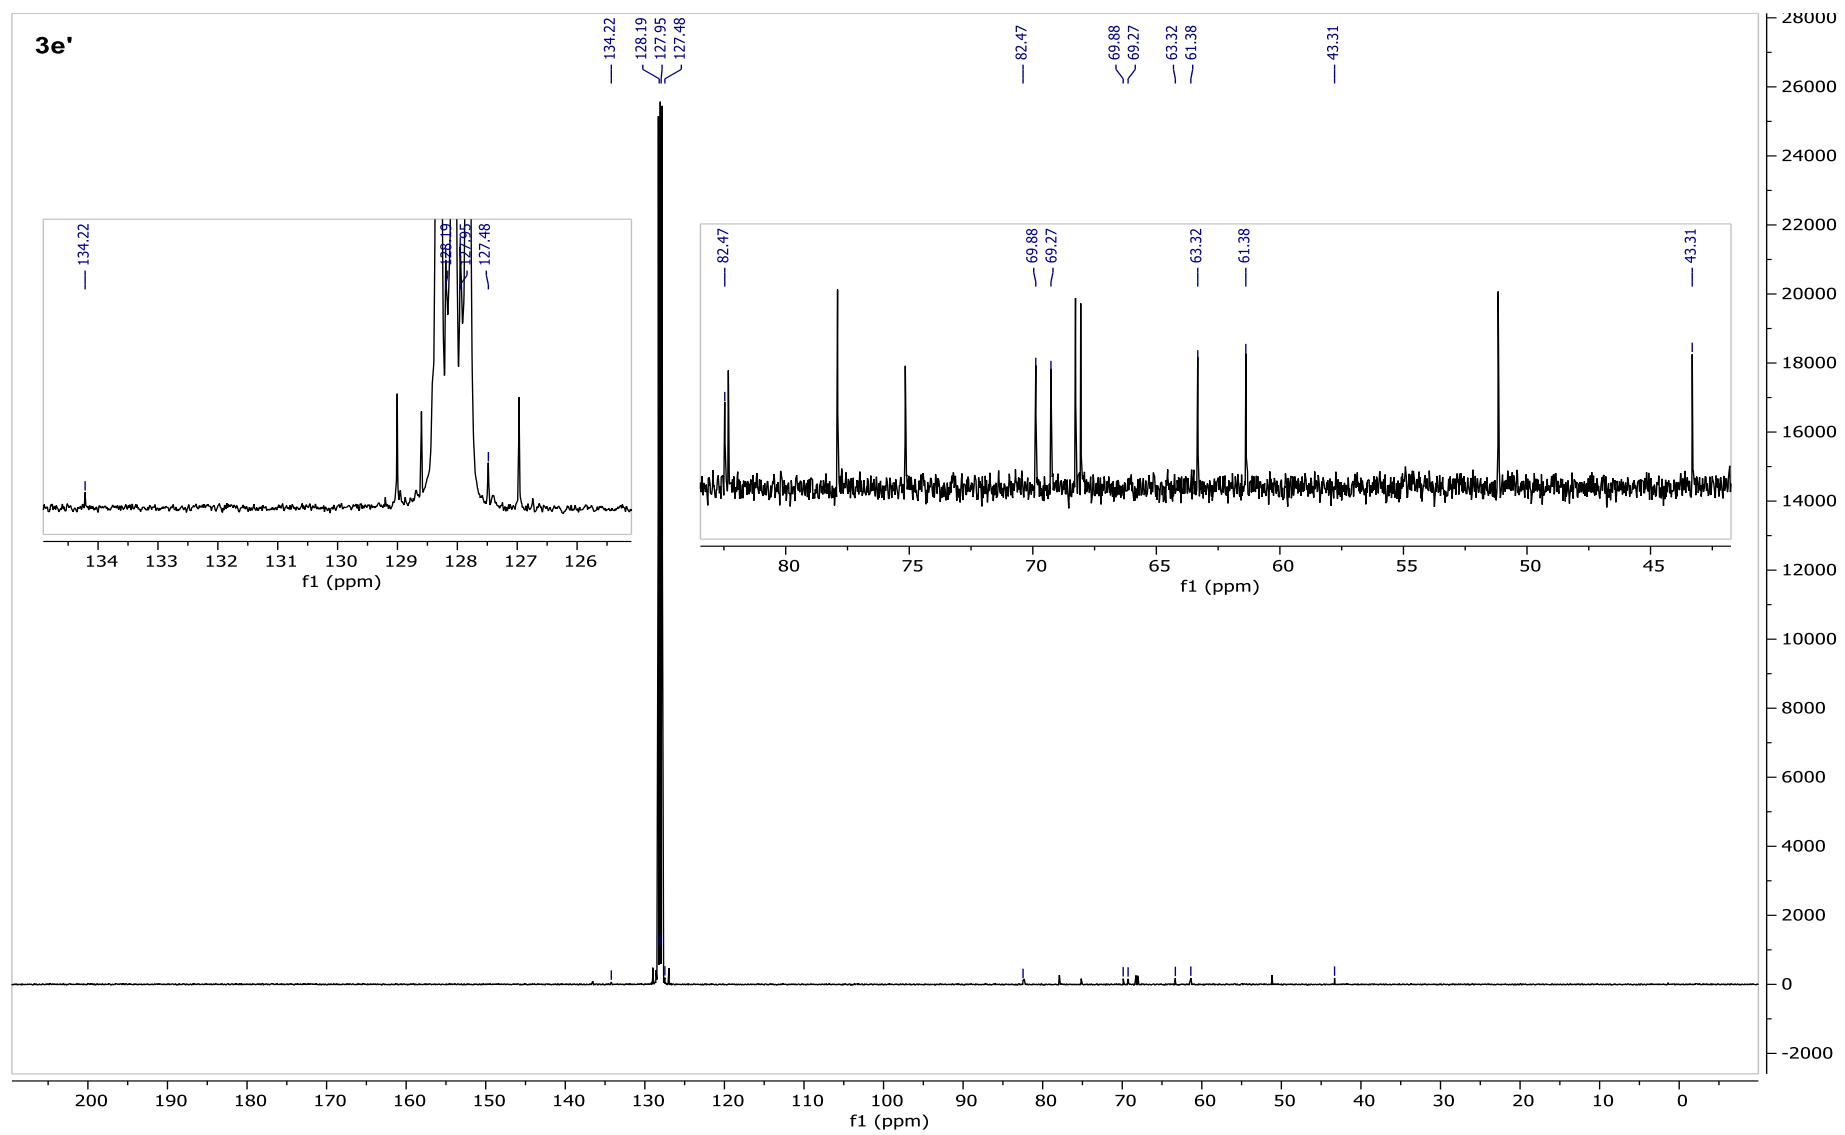

3e'':  $^1\text{H}$  NMR (400 MHz,  $\text{C}_6\text{D}_6$ ):

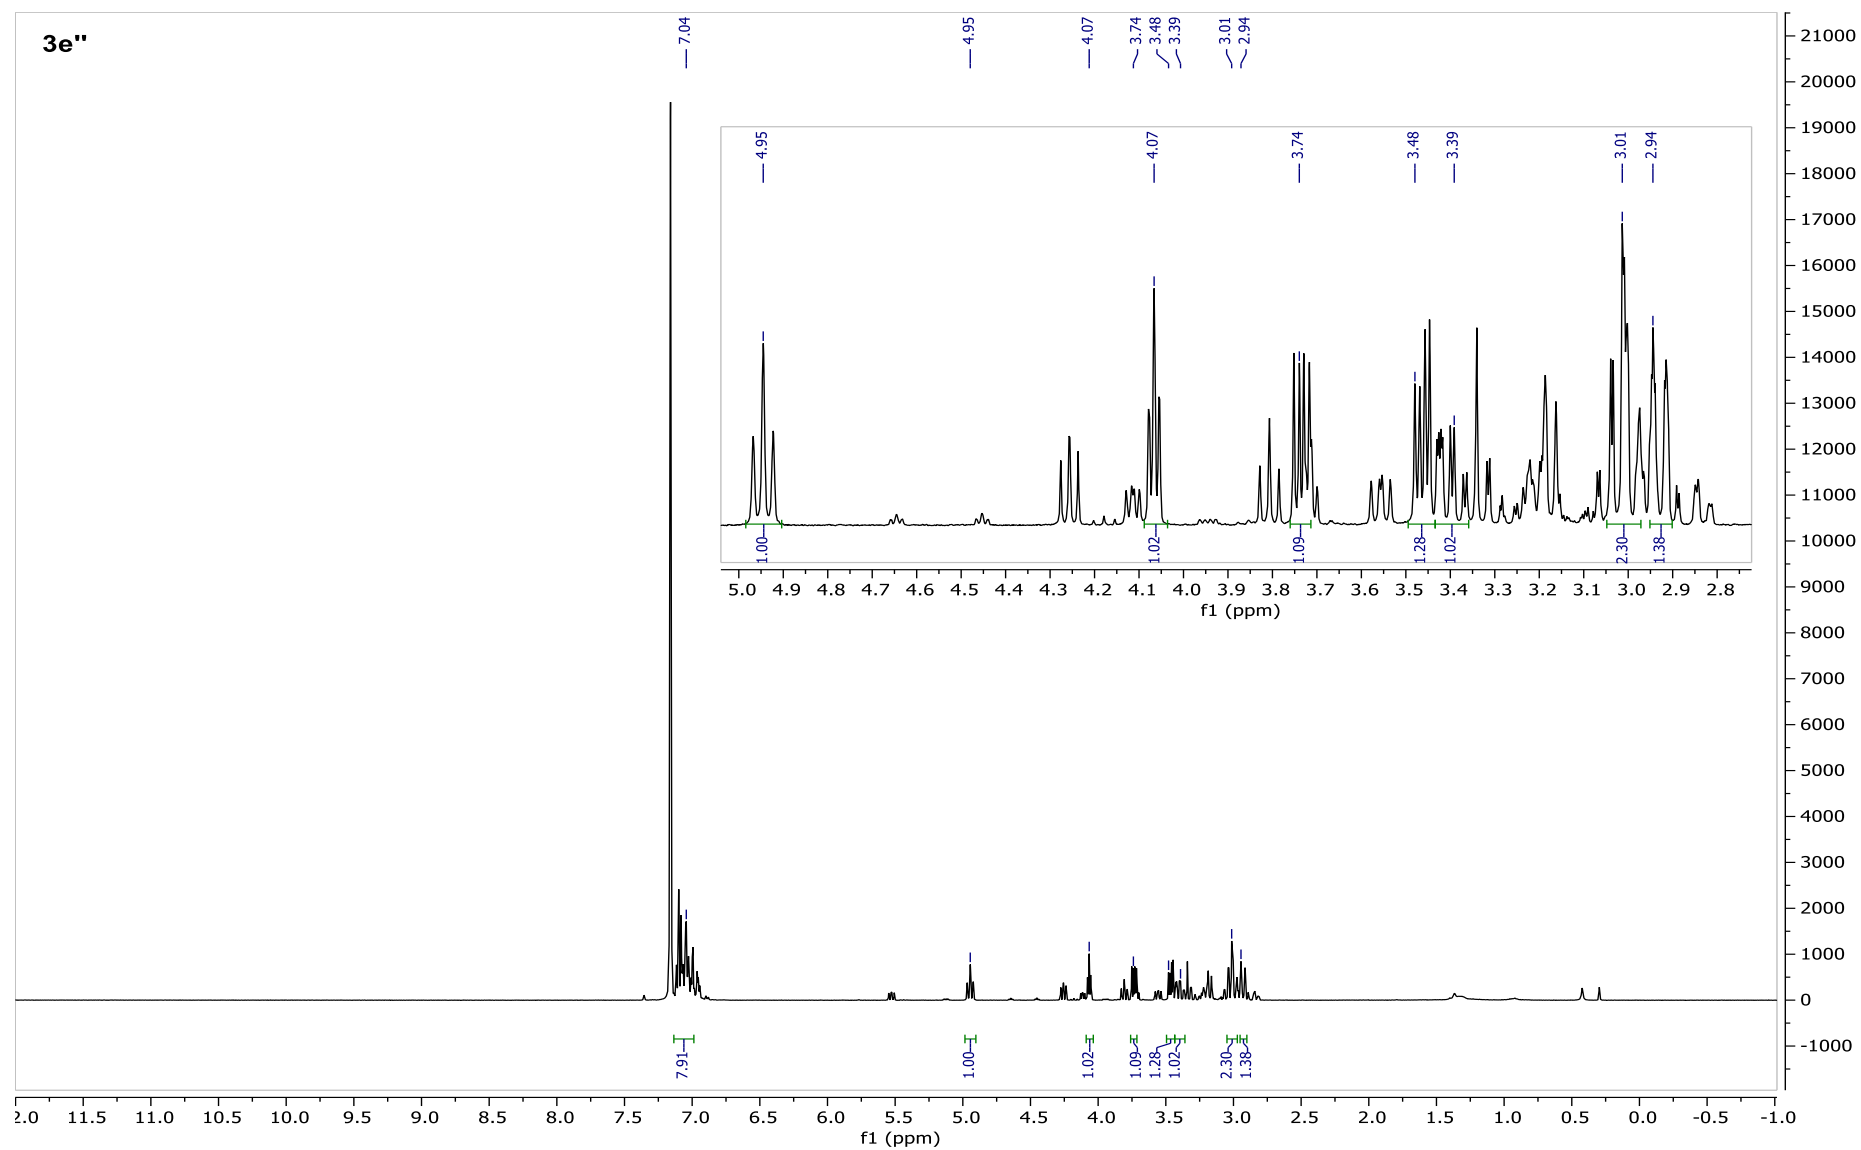

$^{13}\text{C}$  NMR (101 MHz,  $\text{C}_6\text{D}_6$ ):

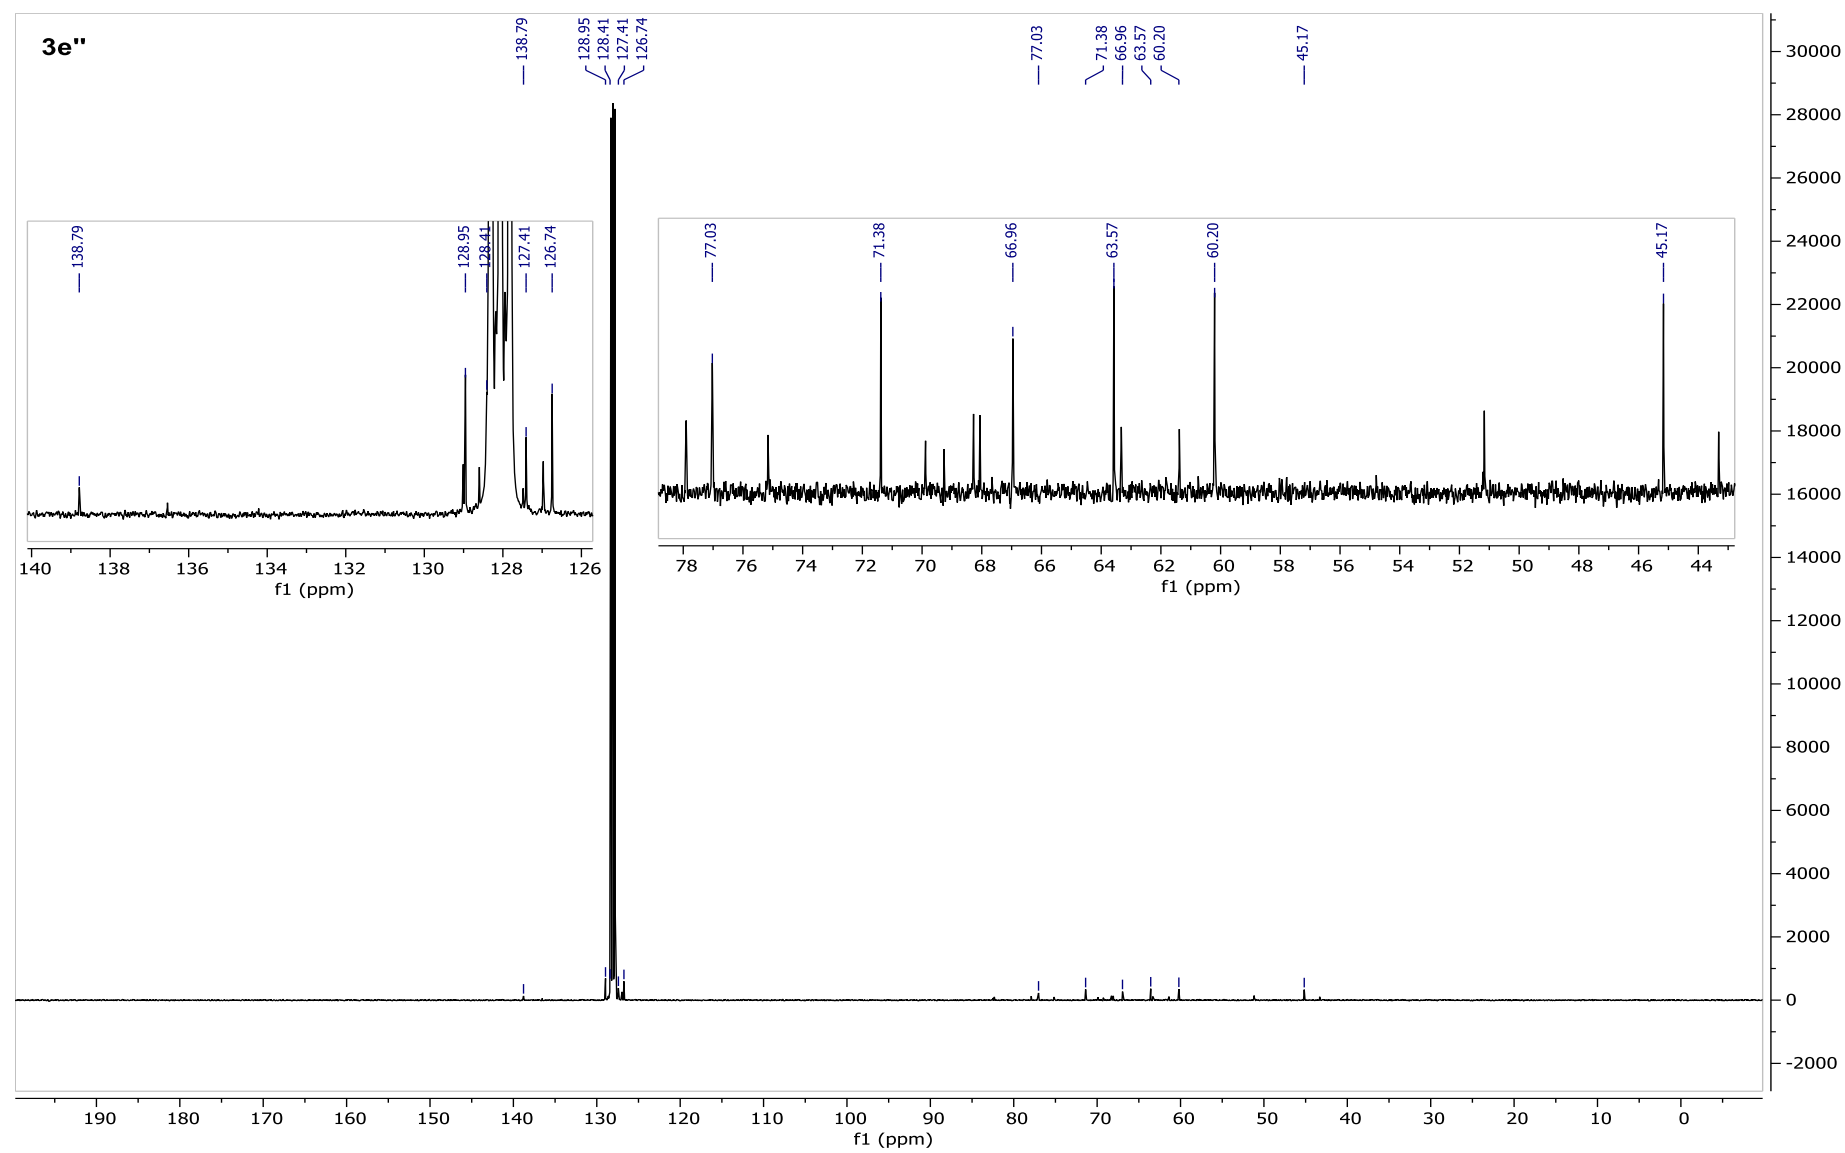

(1'-Cyclopropyl-3'-nitrocyclobutane-1',2'-diyl)dibenzene (3f):  $^1\text{H}$  NMR (500 MHz,  $\text{CDCl}_3$ ):

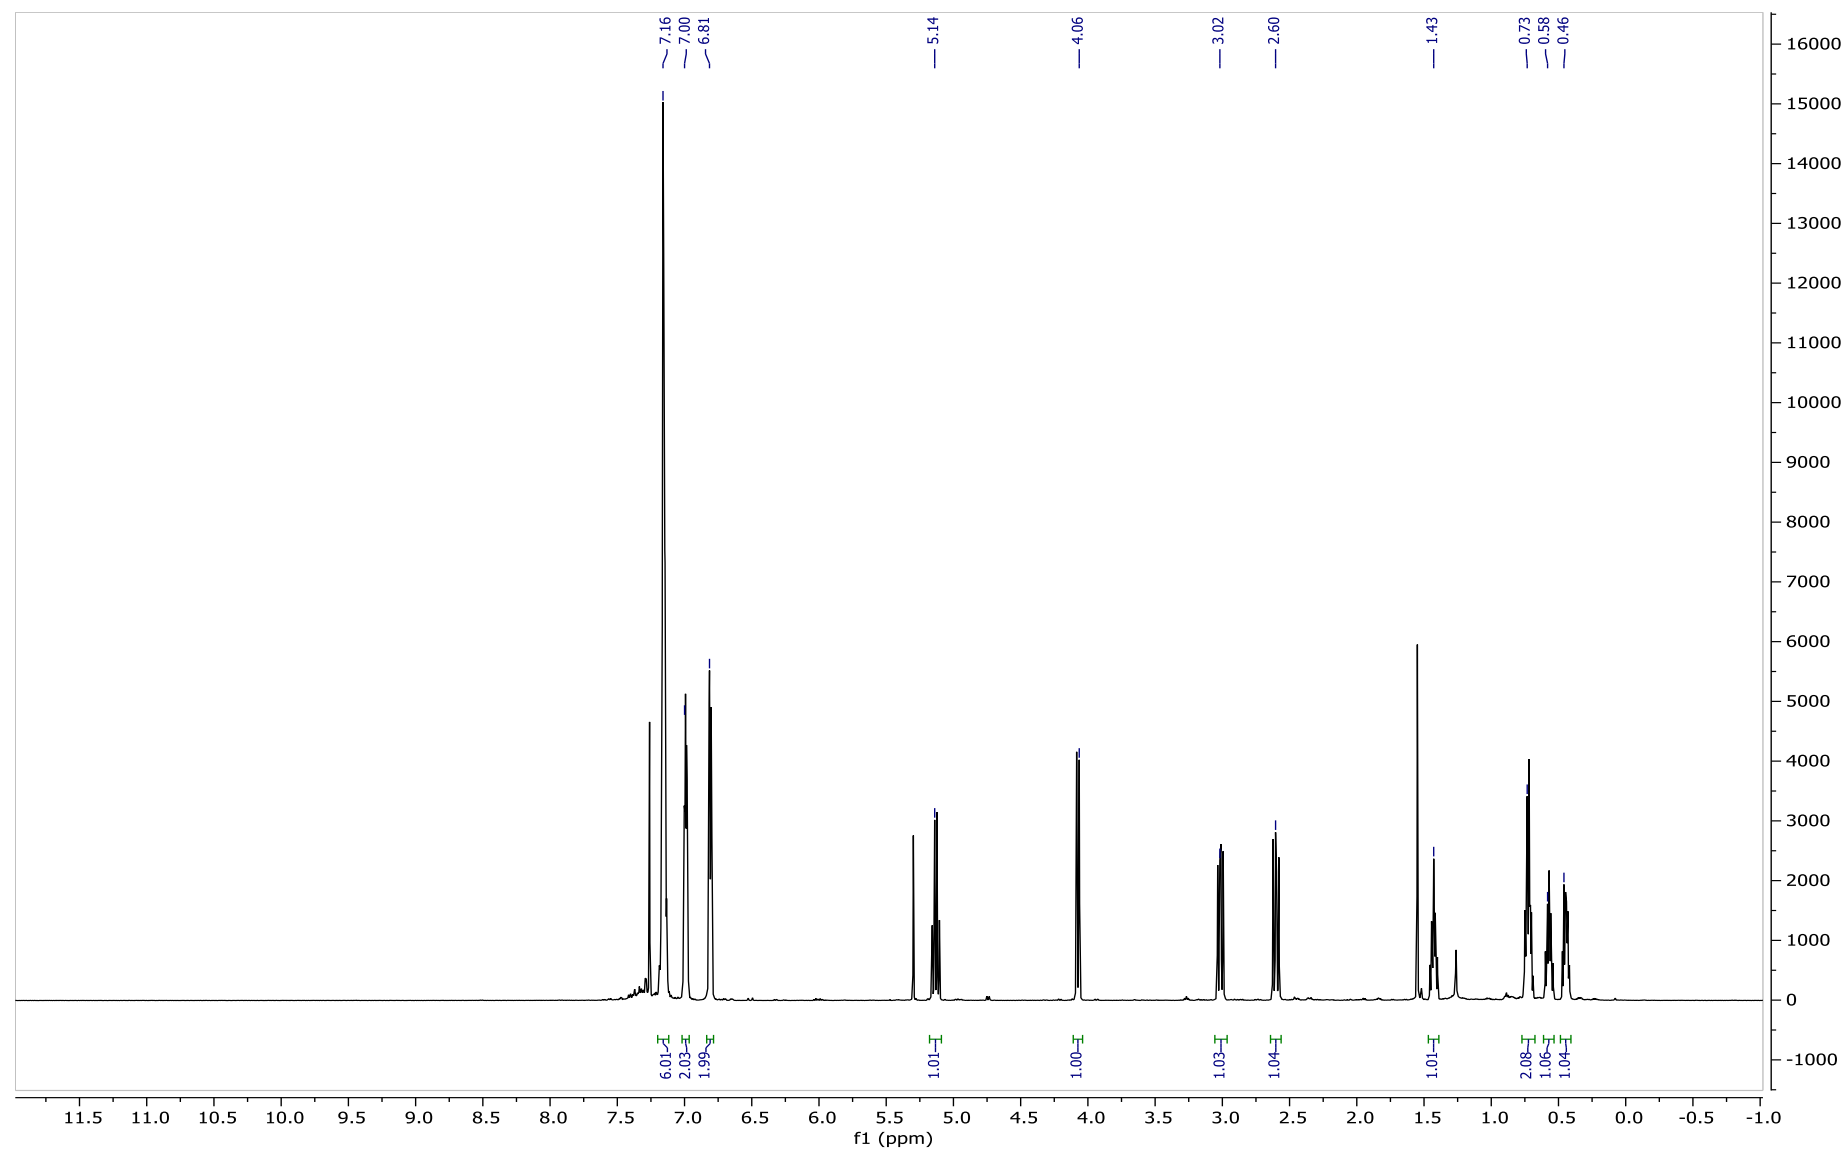

<sup>13</sup>C NMR (101 MHz, CDCl<sub>3</sub>):

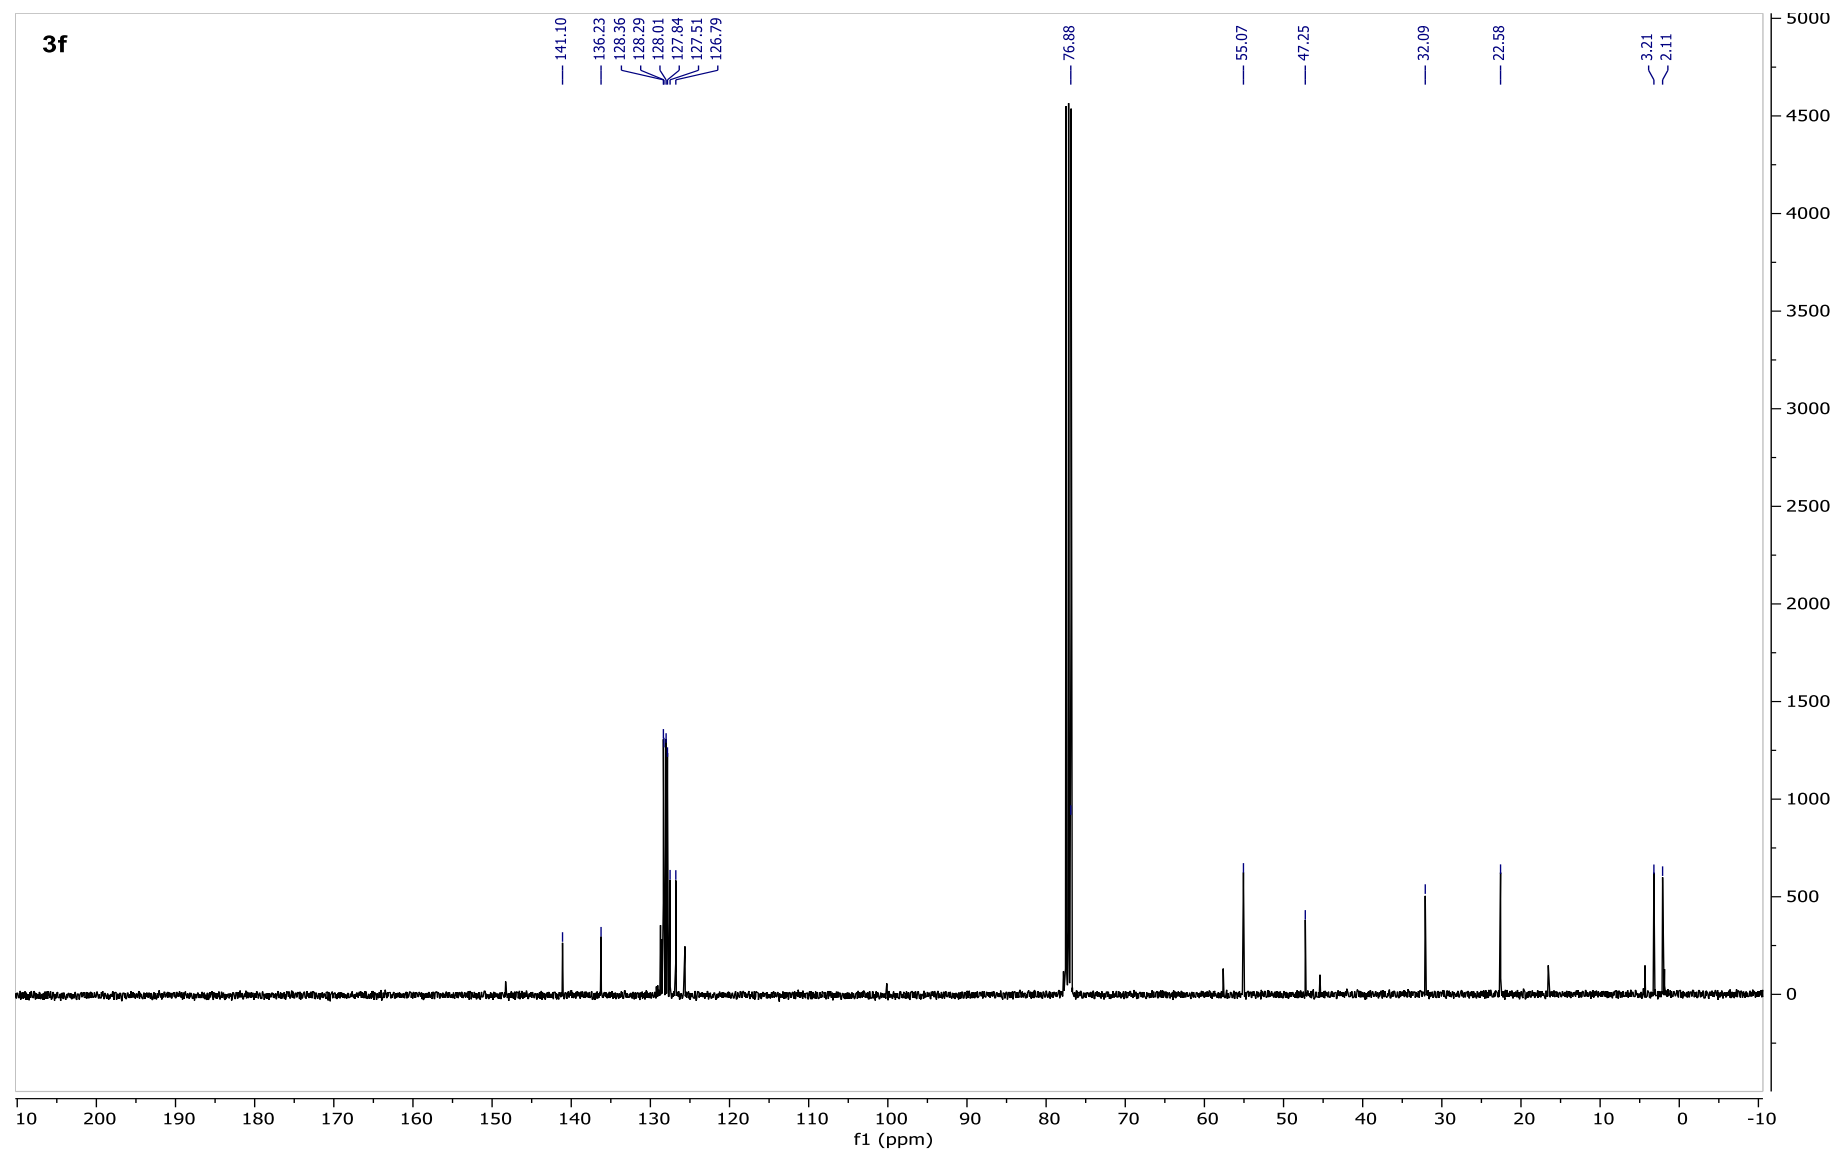

3f:  $^1\text{H}$  NMR (500 MHz,  $\text{CDCl}_3$ ):

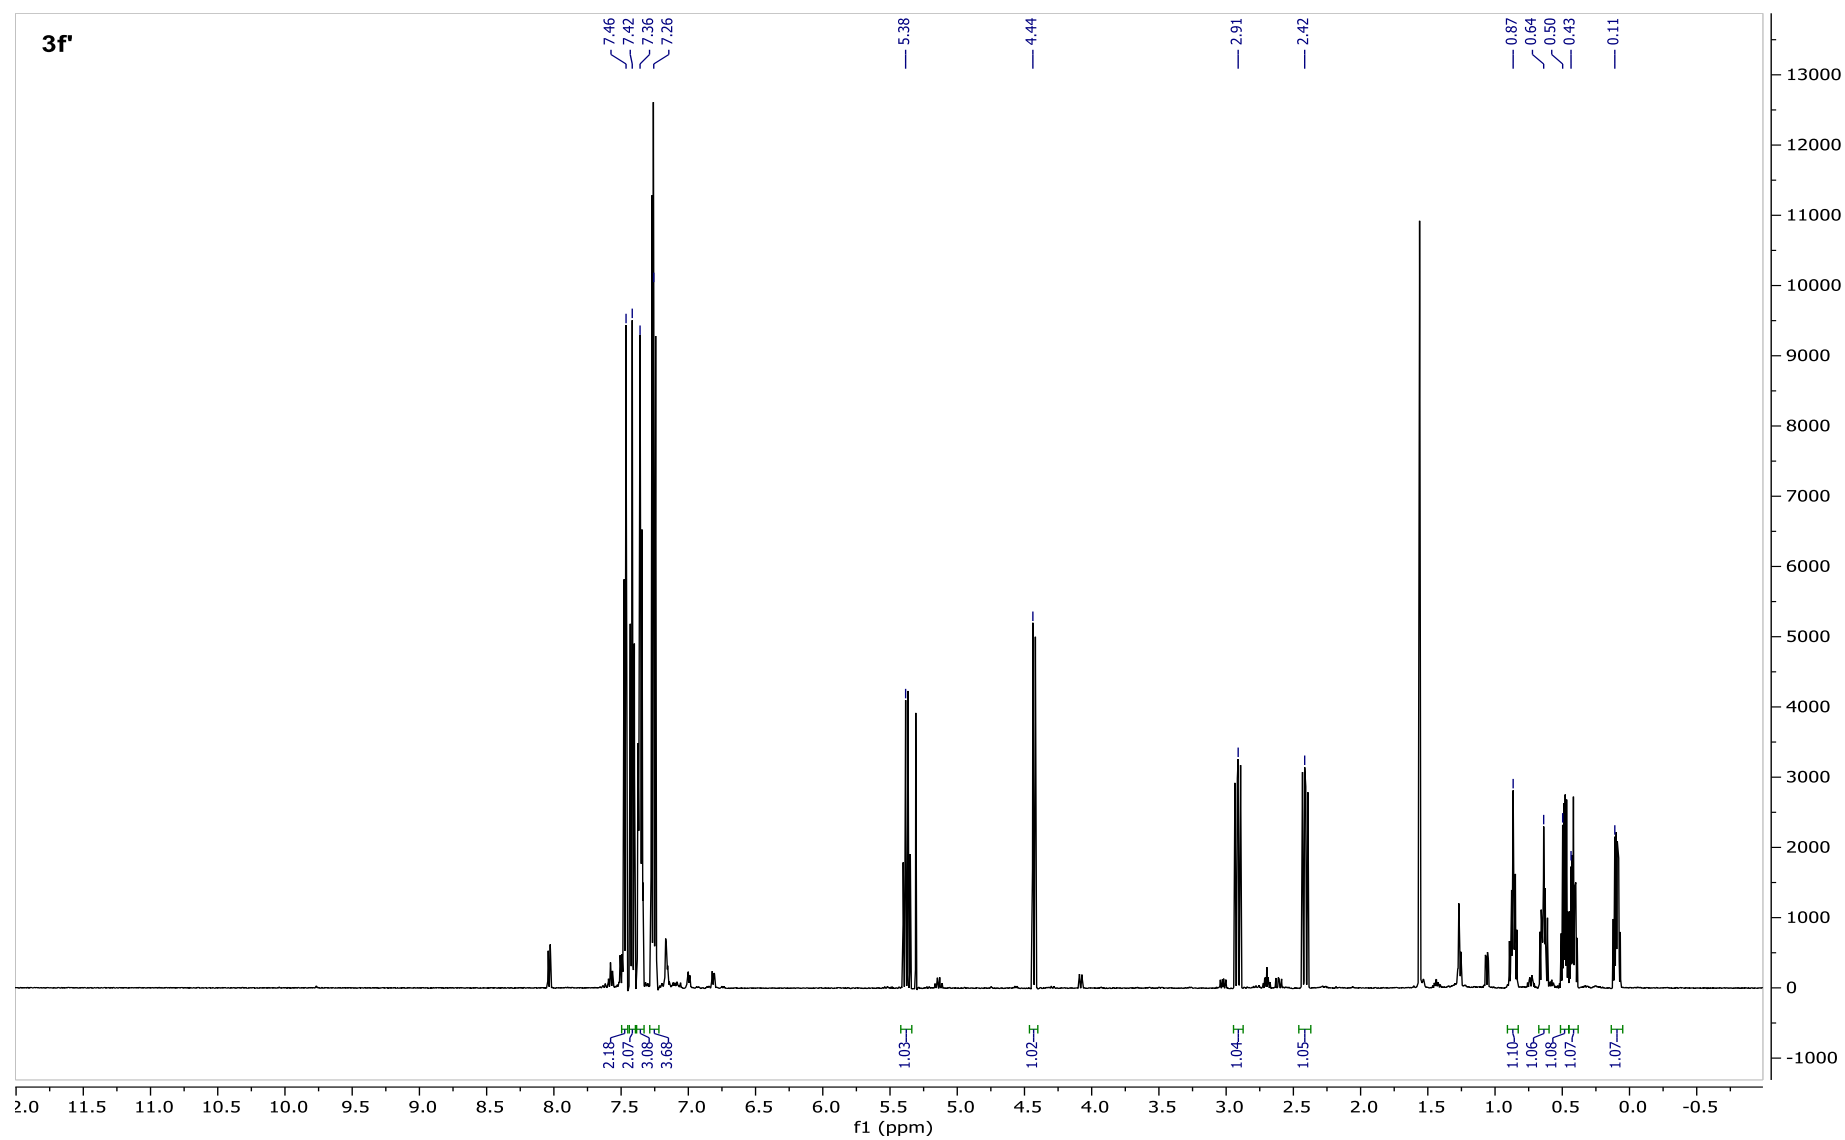

<sup>13</sup>C NMR (126 MHz, CDCl<sub>3</sub>):

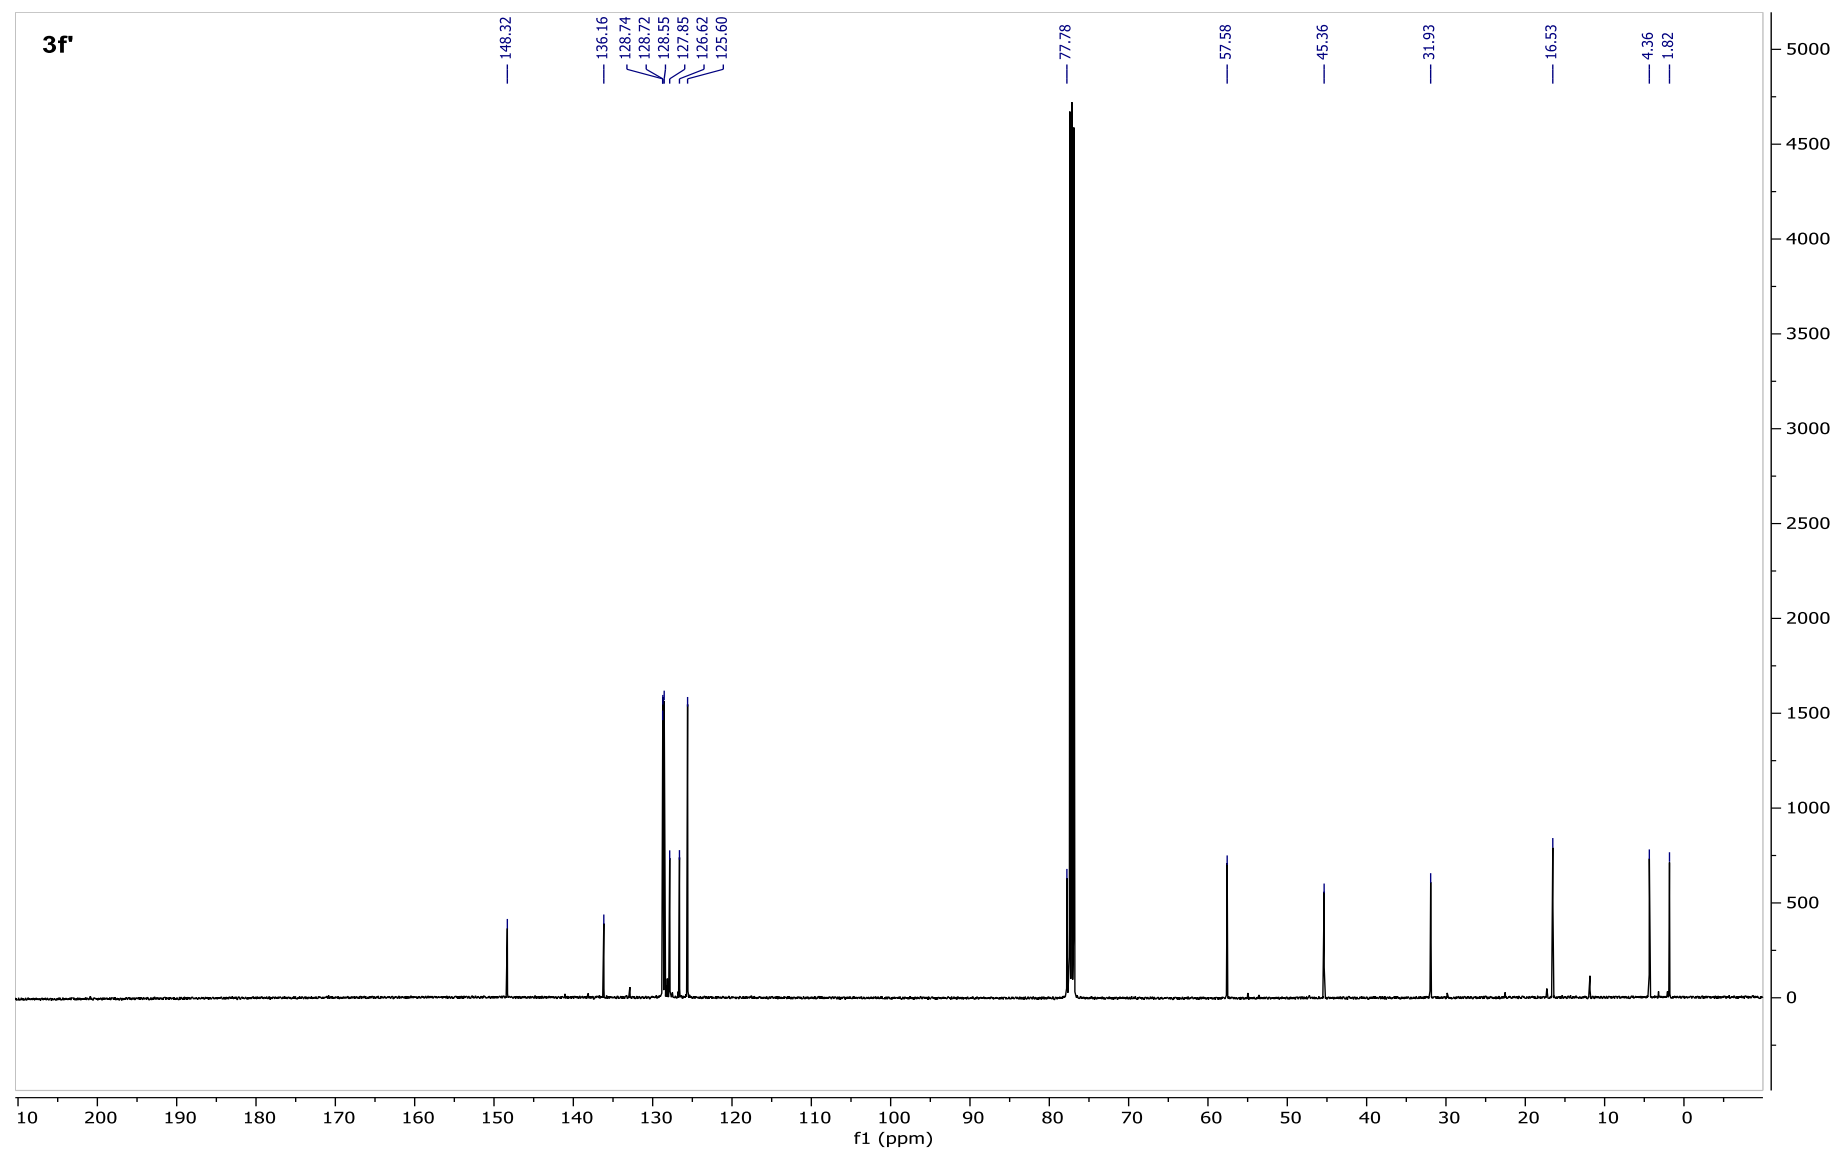

[1-(*tert*-Butyl)-3-nitro-2-phenylcyclobutoxy]trimethylsilane (3g):  $^1\text{H}$  NMR (500 MHz,  $\text{CDCl}_3$ ):

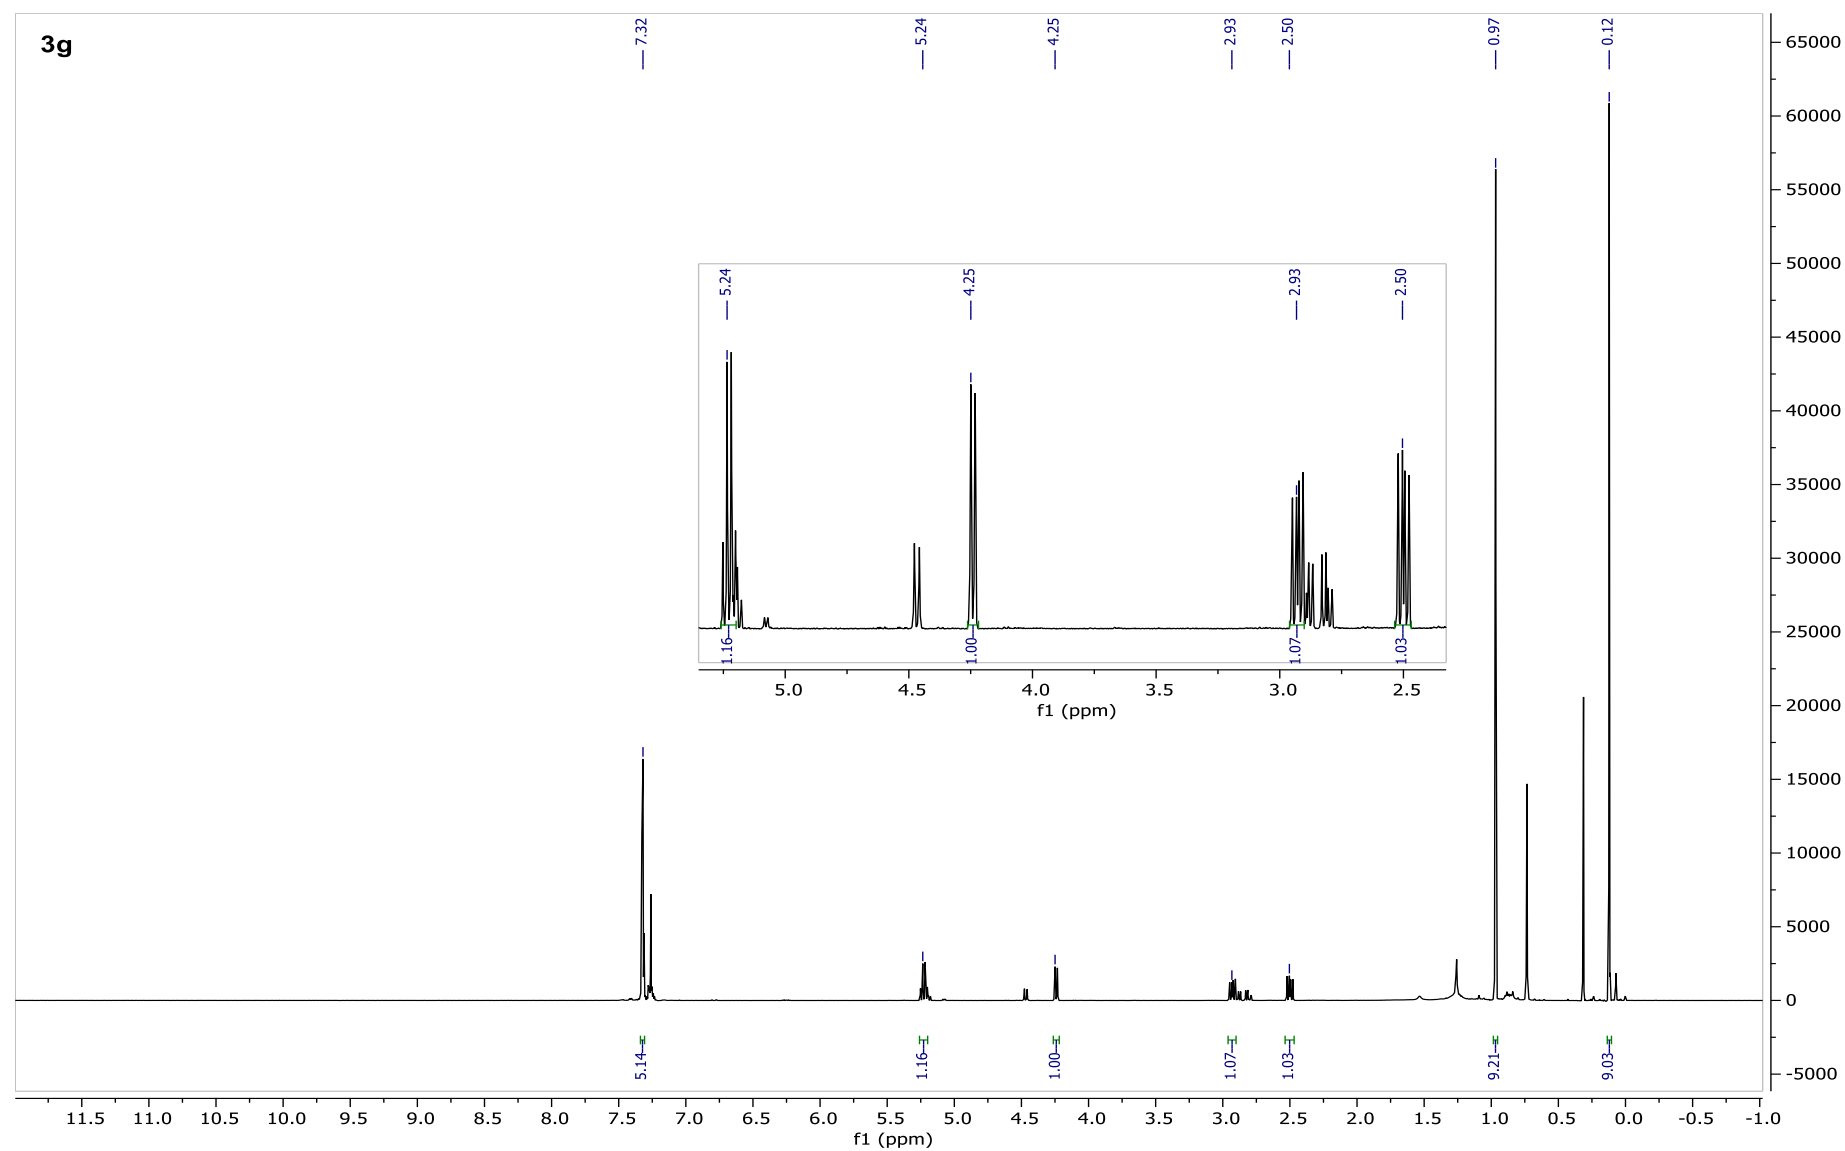



$^{13}\text{C}$  NMR (126 MHz,  $\text{CDCl}_3$ ):

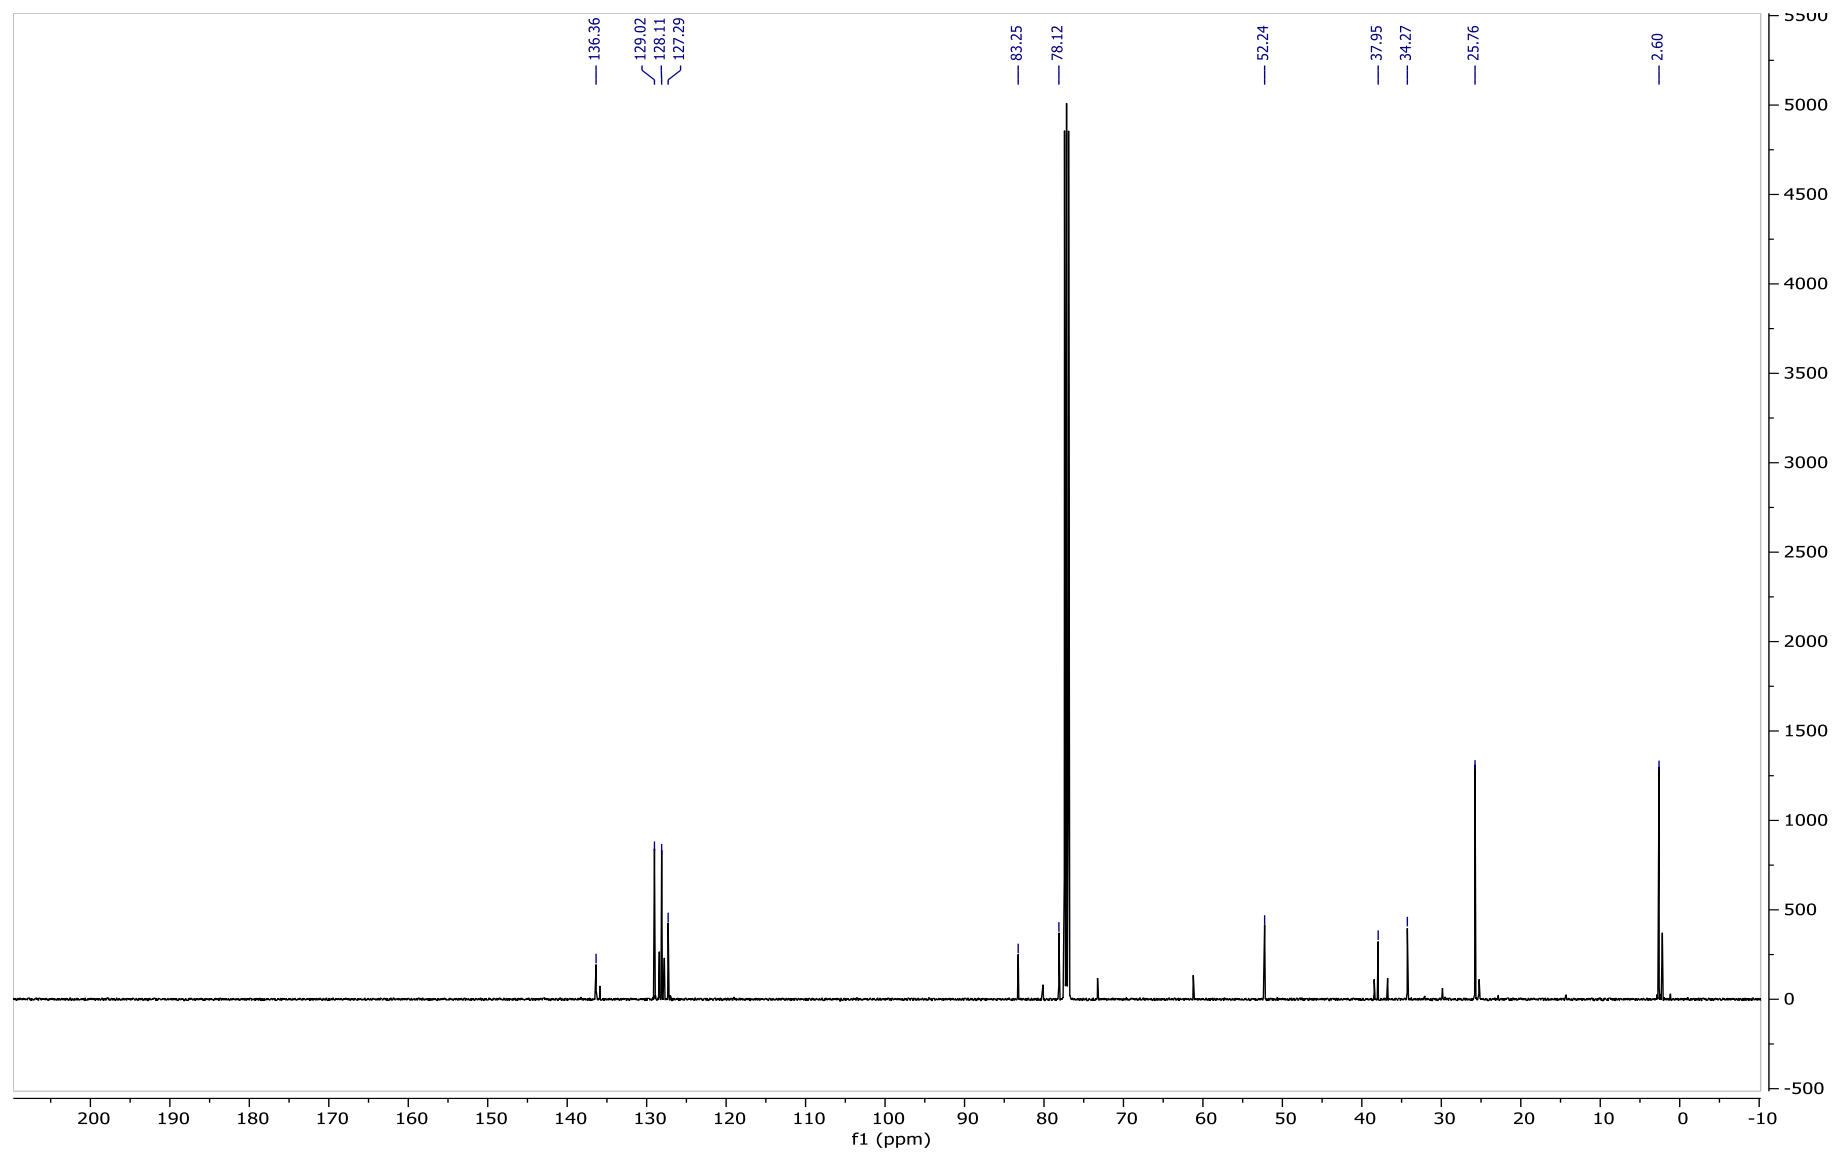

3g':  $^1\text{H}$  NMR (500 MHz,  $\text{CDCl}_3$ ):

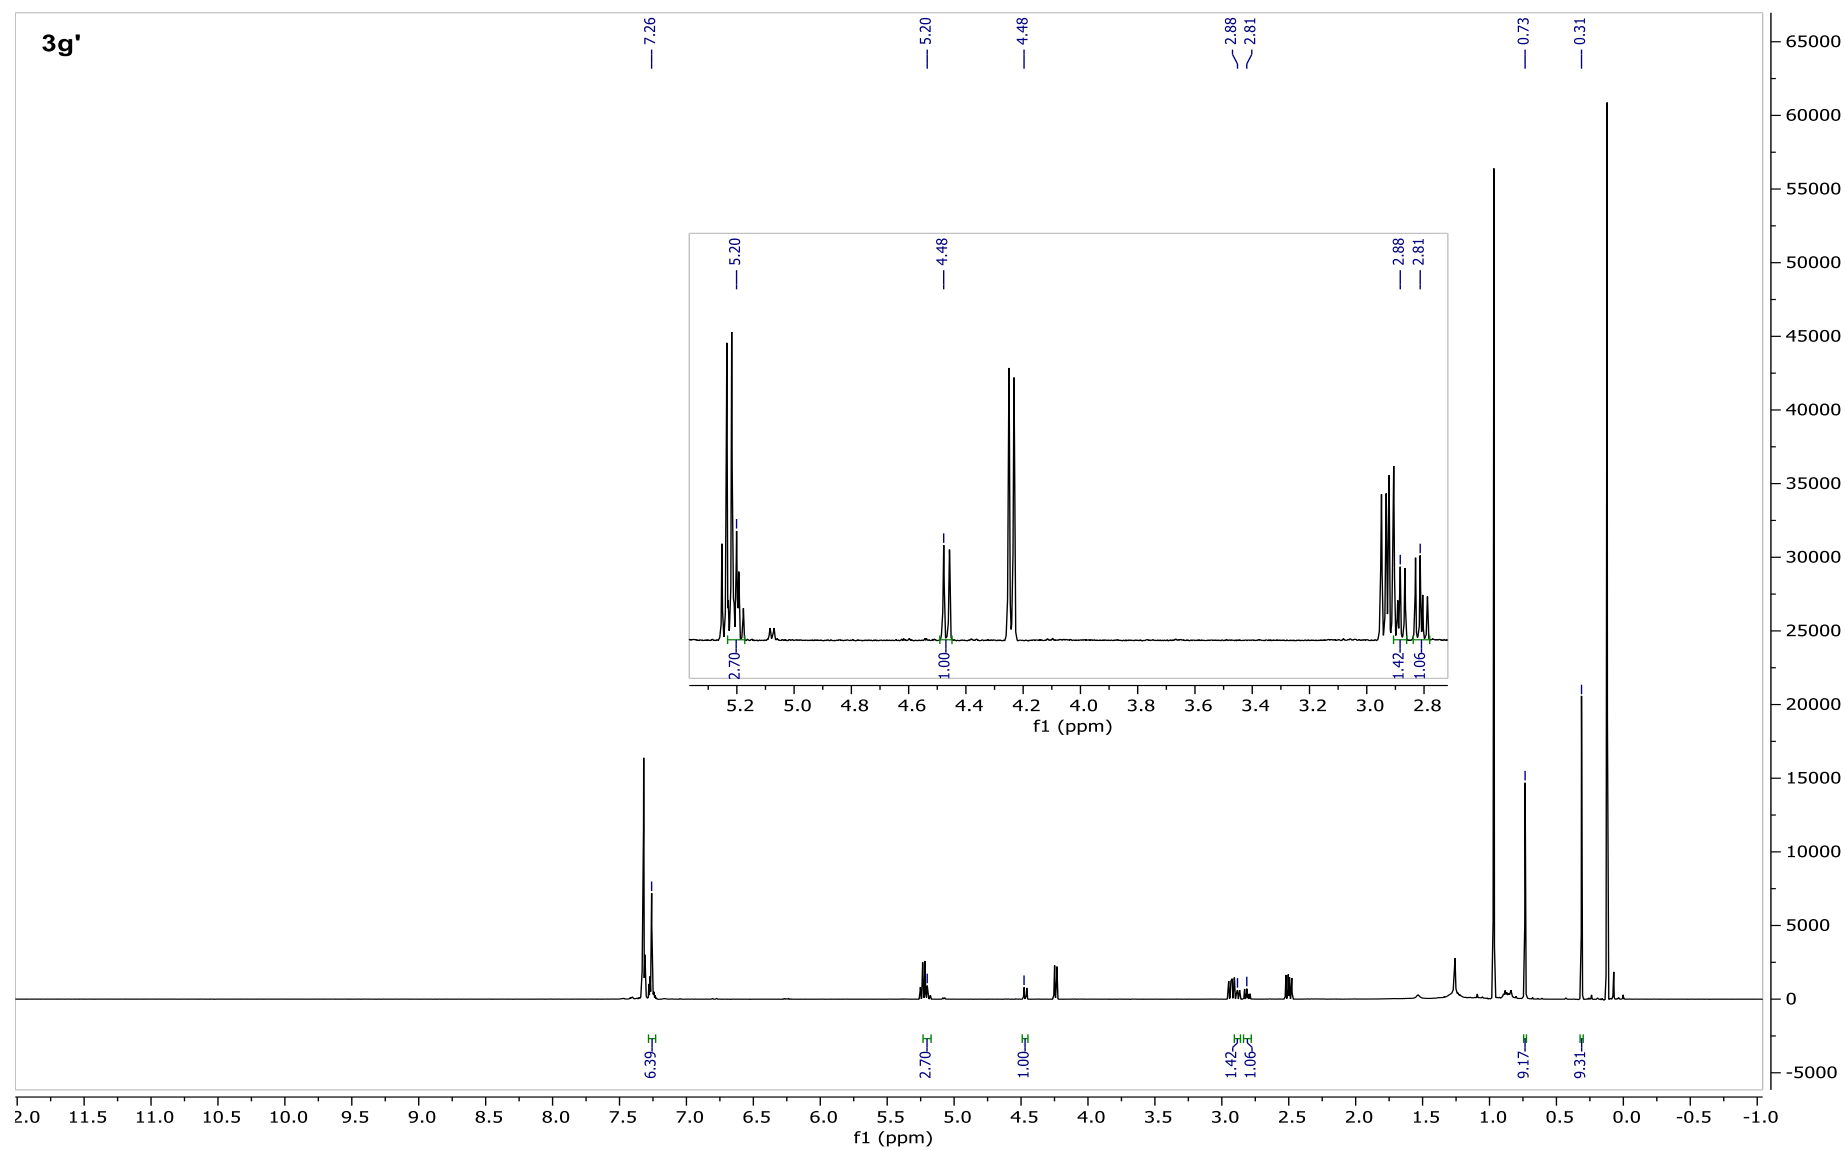

<sup>13</sup>C NMR (126 MHz, CDCl<sub>3</sub>):

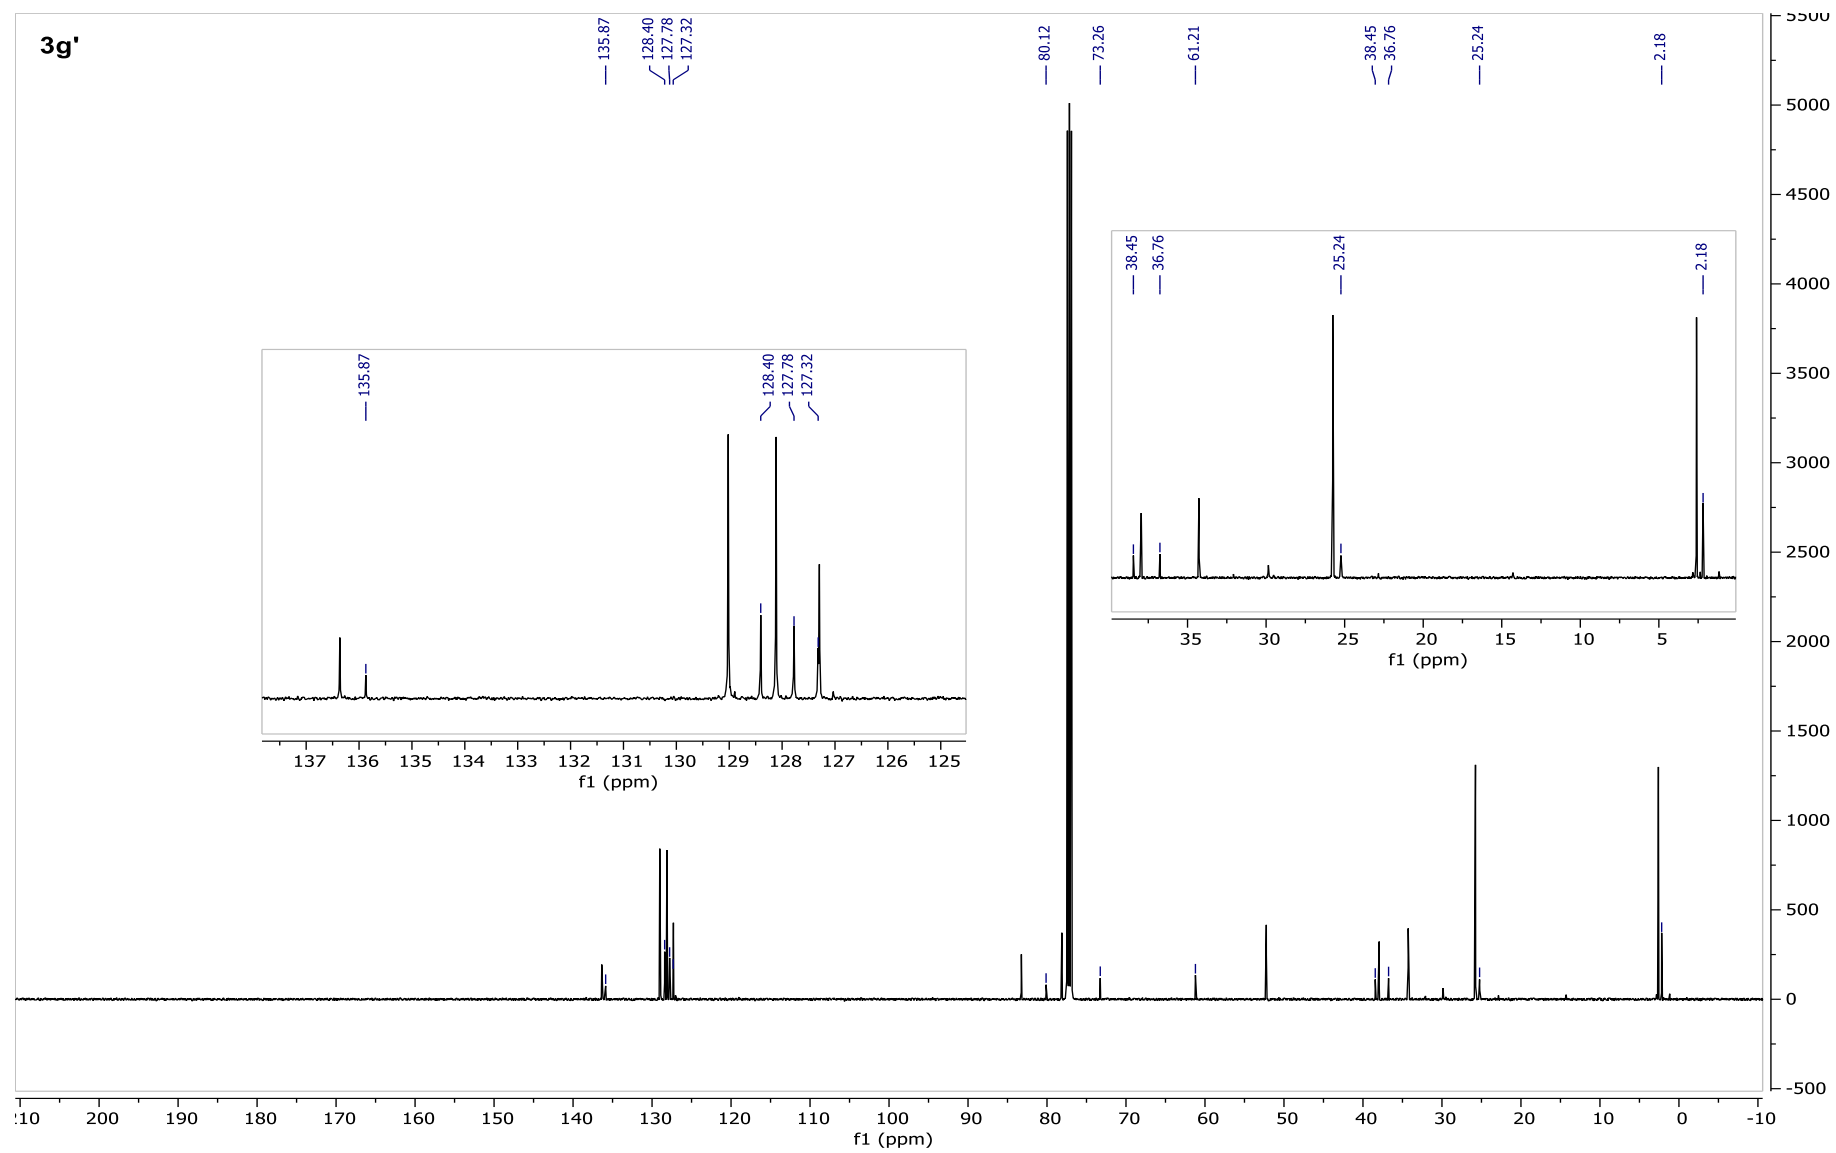

**Trimethyl[(6-nitro-7-phenylbicyclo[3.2.0]heptan-1-yl)oxy]silane (3h): <sup>1</sup>H NMR (500 MHz, CDCl<sub>3</sub>):**

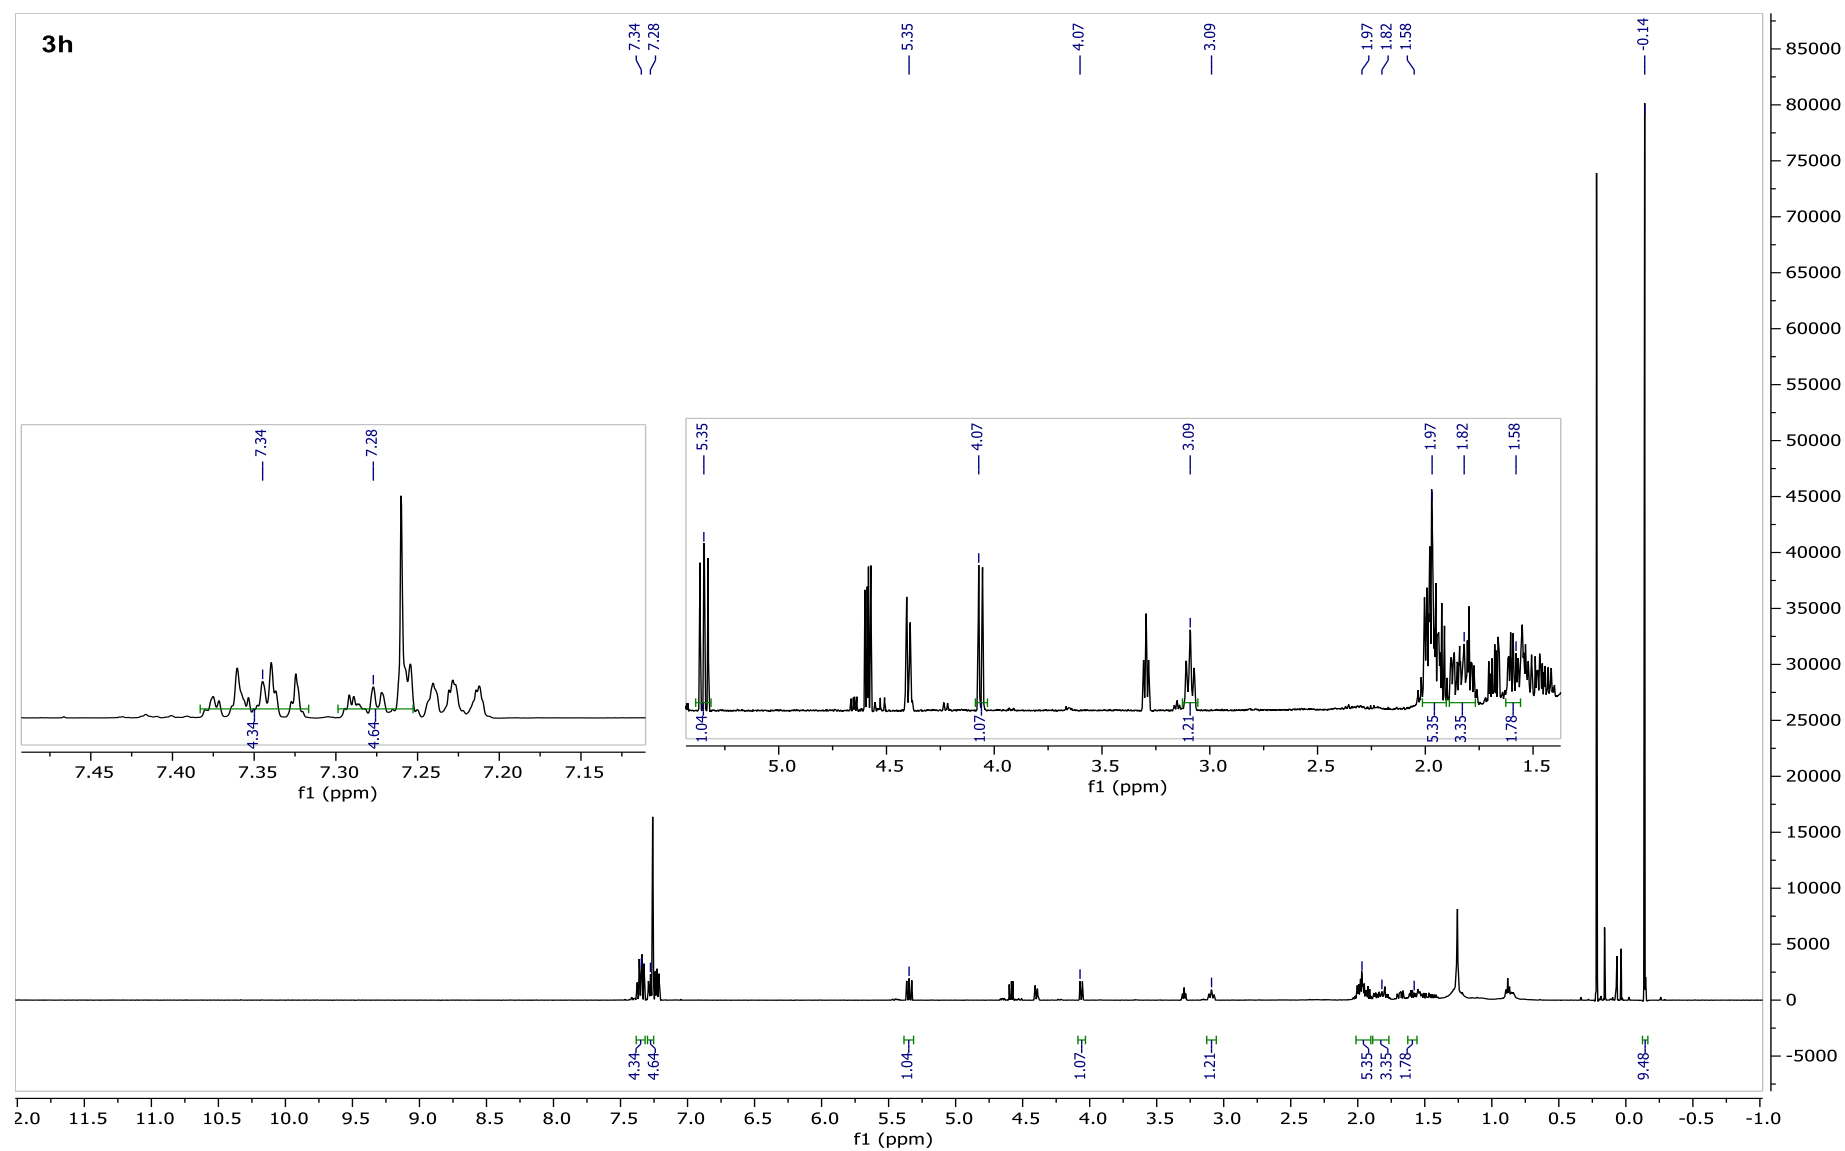

<sup>13</sup>C NMR (126 MHz, CDCl<sub>3</sub>):

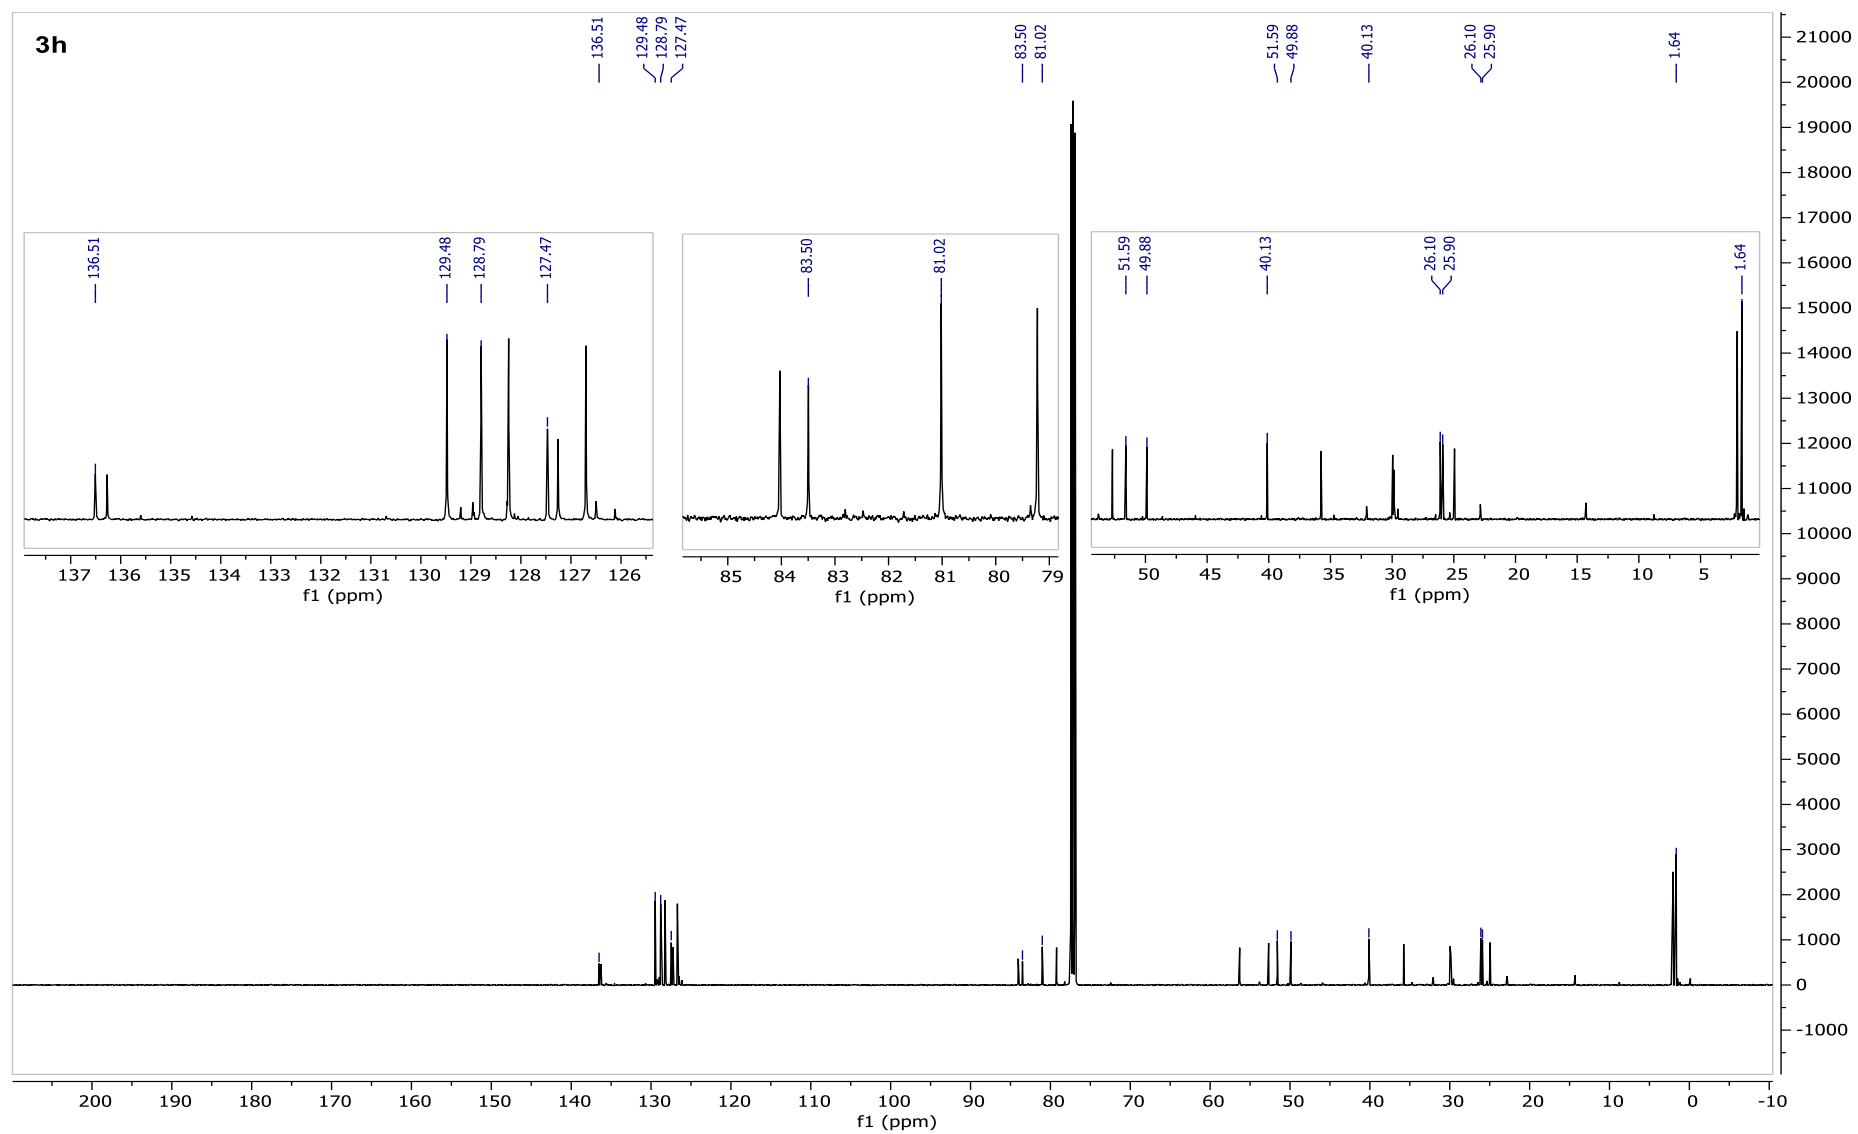

3h': <sup>1</sup>H NMR (500 MHz, CDCl<sub>3</sub>):

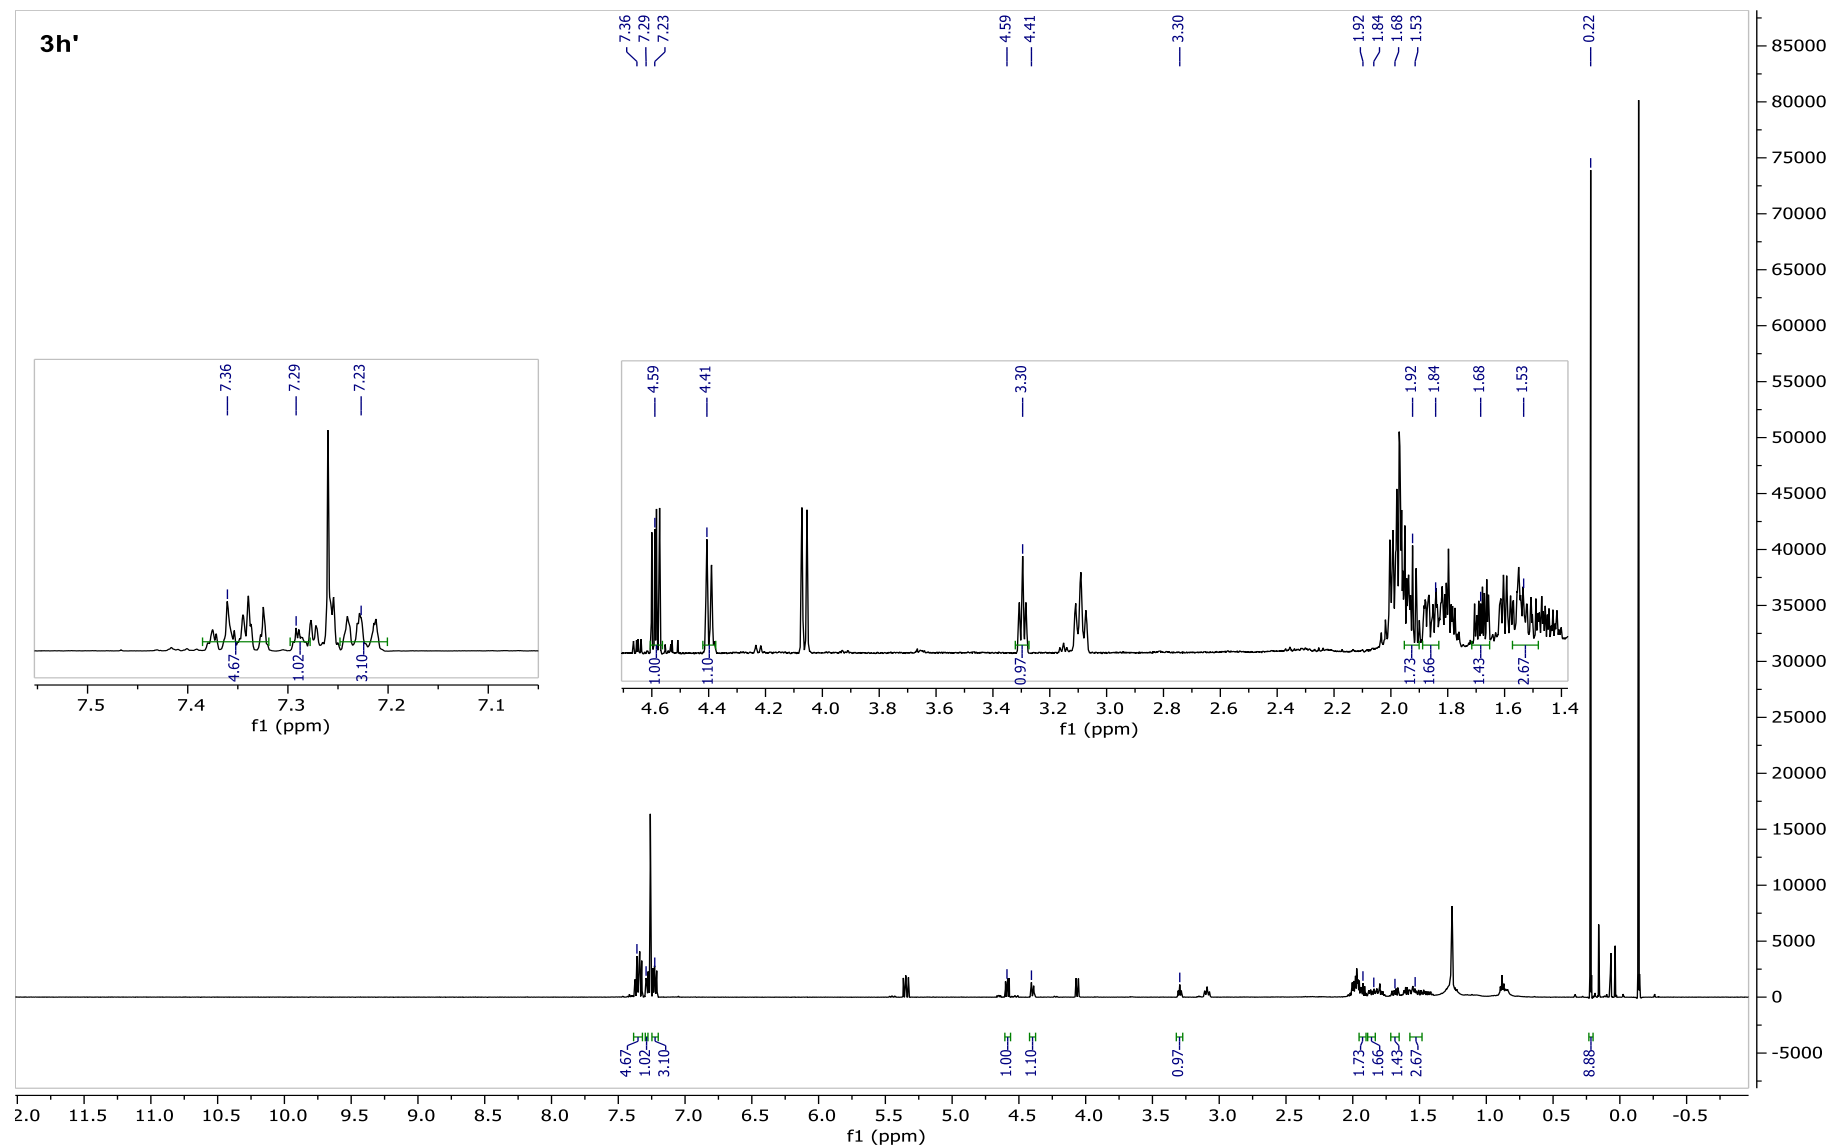

<sup>13</sup>C NMR (126 MHz, CDCl<sub>3</sub>):

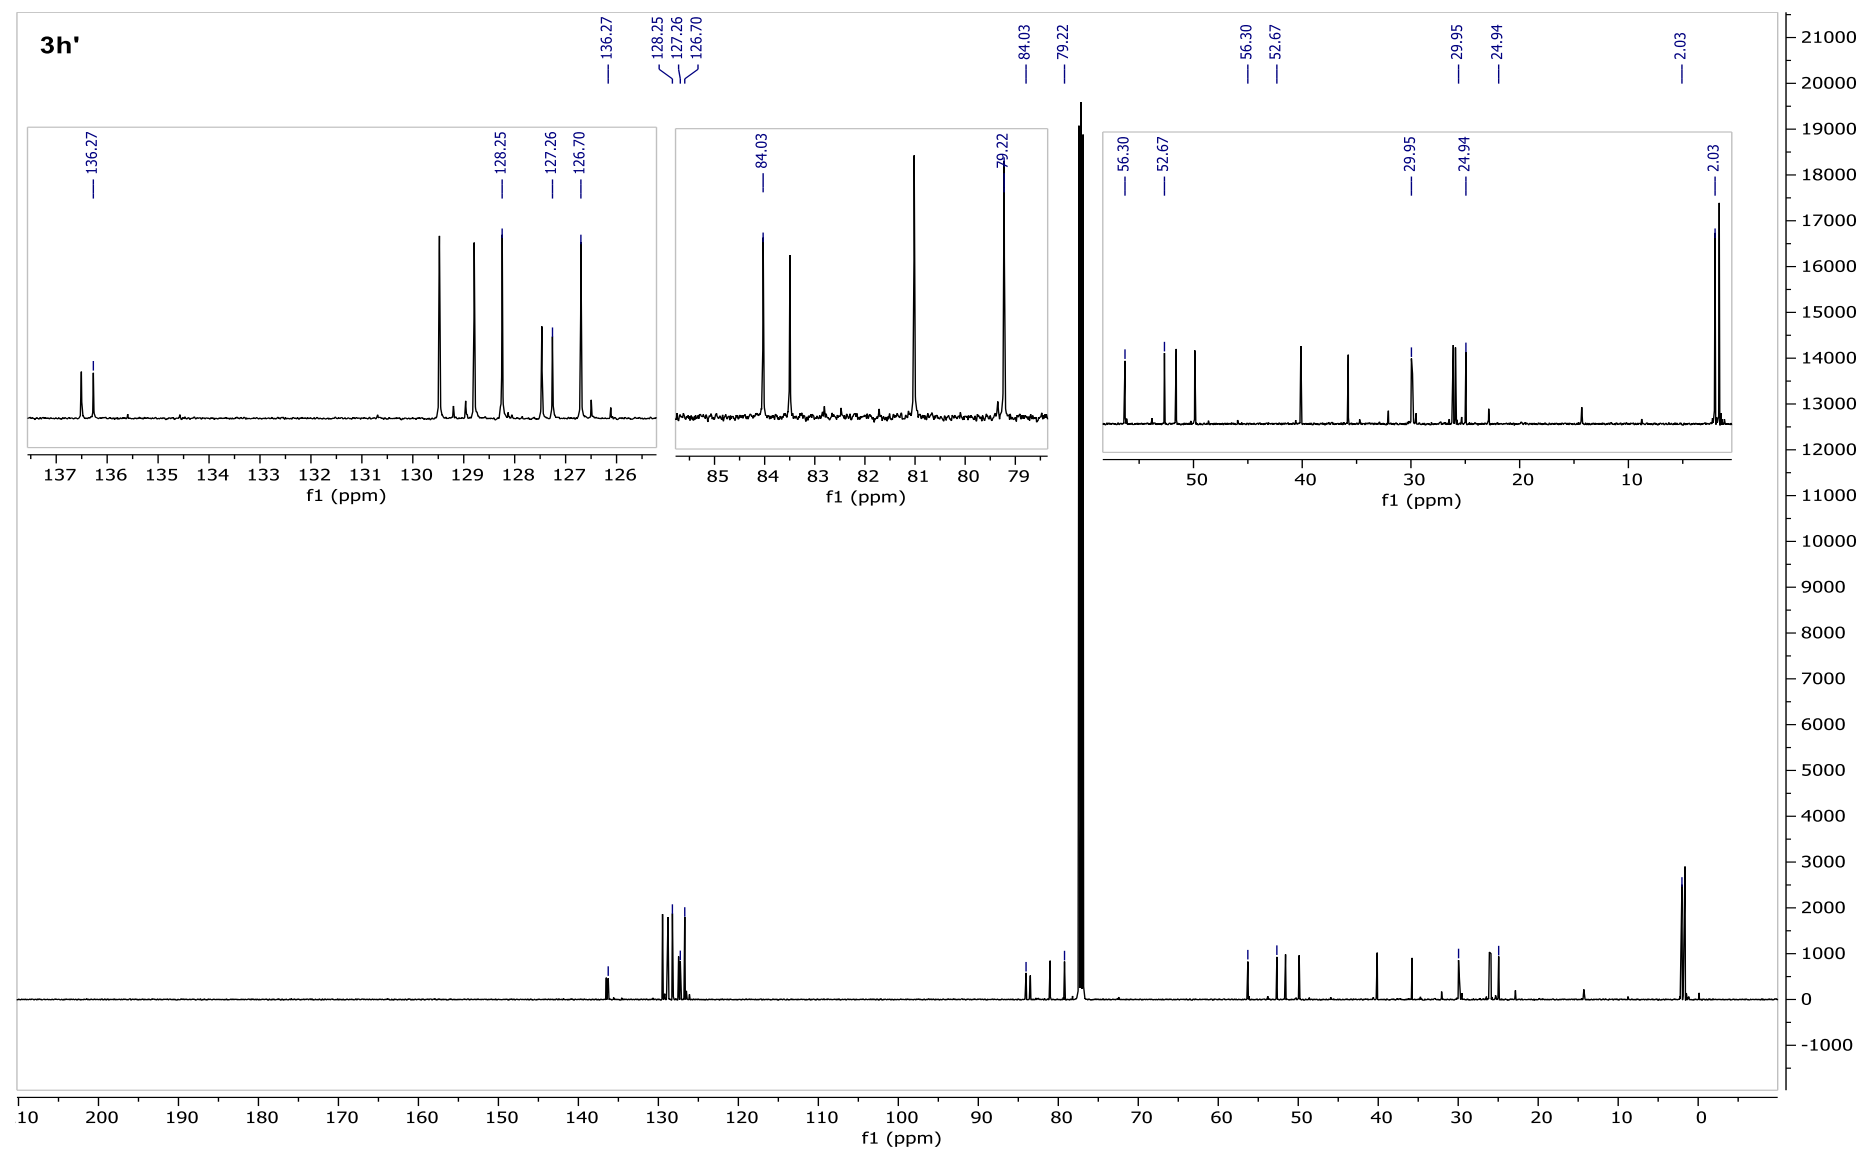

(2',2'-Dicyclopropyl-4'-nitrocyclobutyl)benzene (3i):  $^1\text{H}$  NMR (400 MHz,  $\text{CDCl}_3$ ):

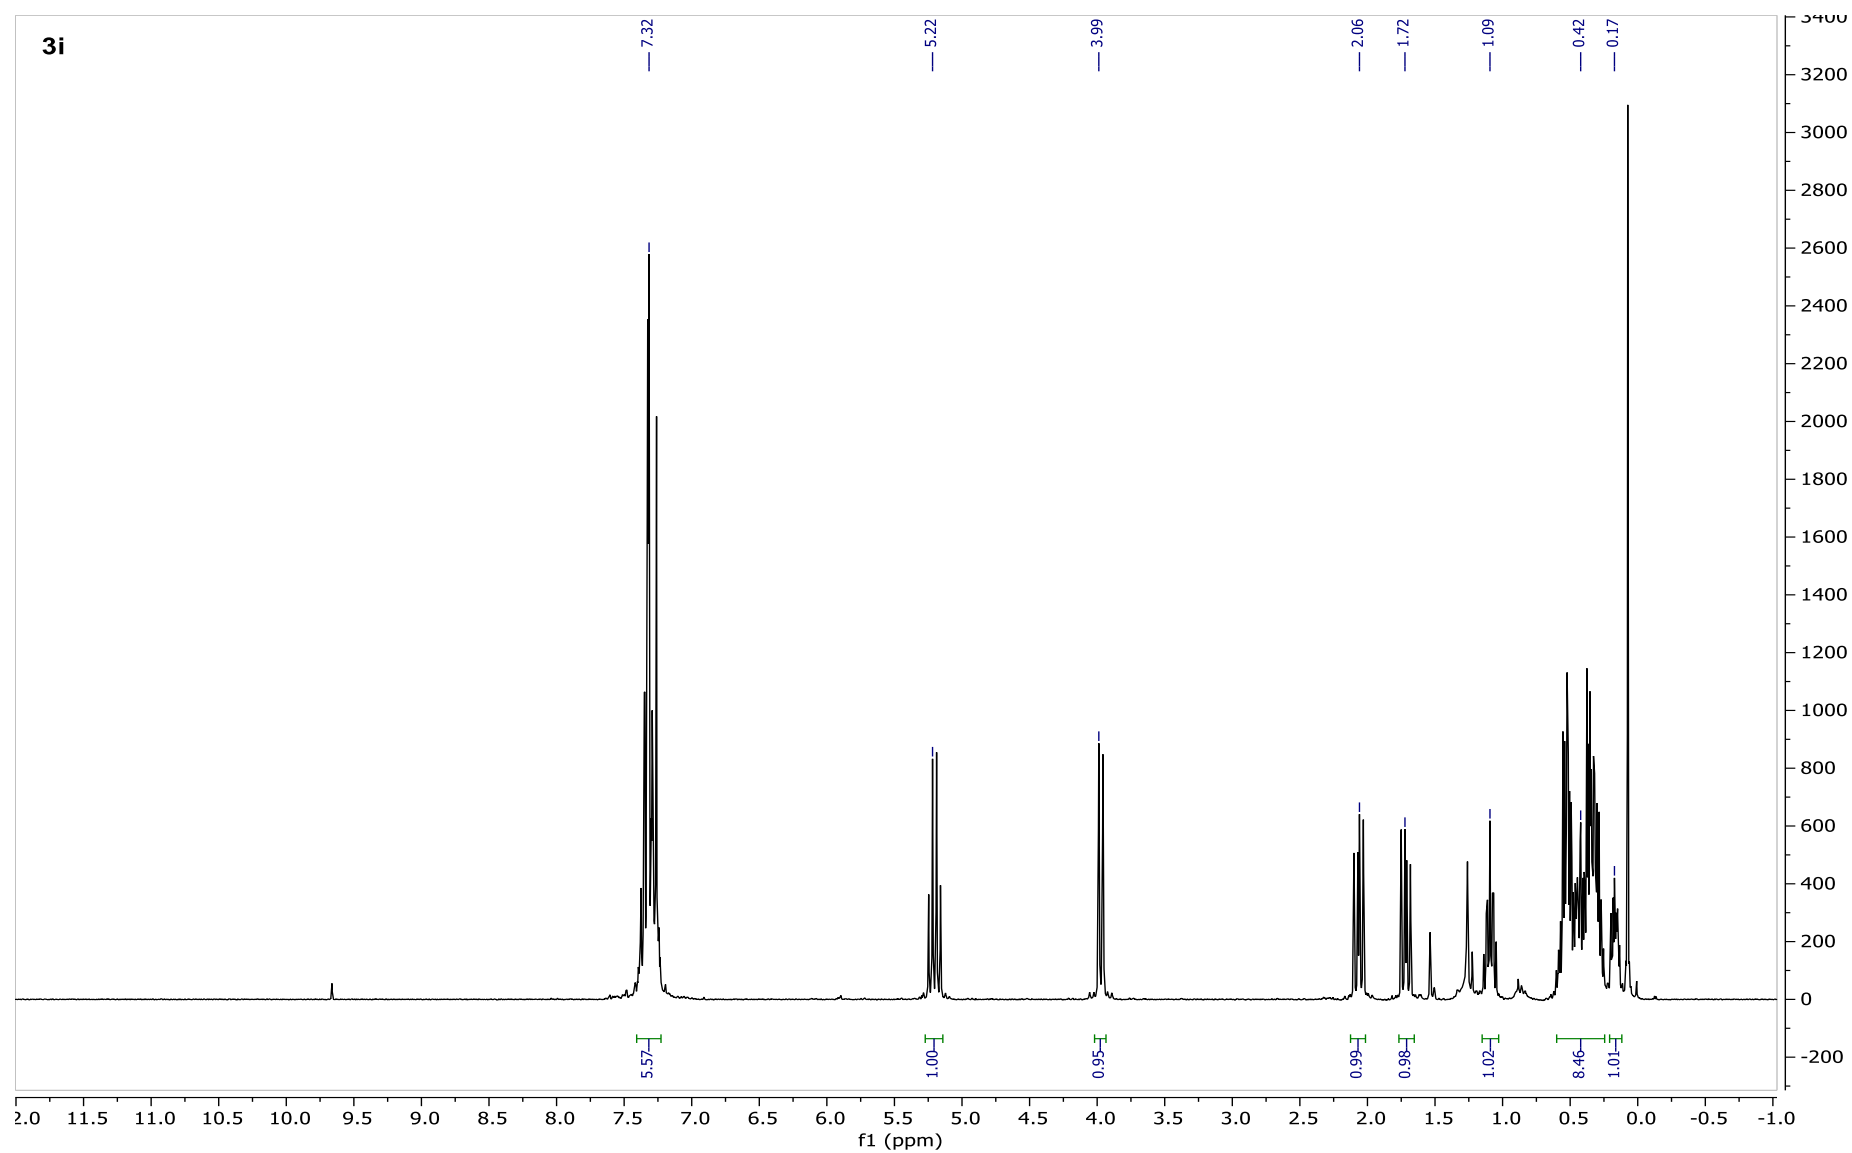



$^{13}\text{C}$  NMR (101 MHz,  $\text{CDCl}_3$ ):

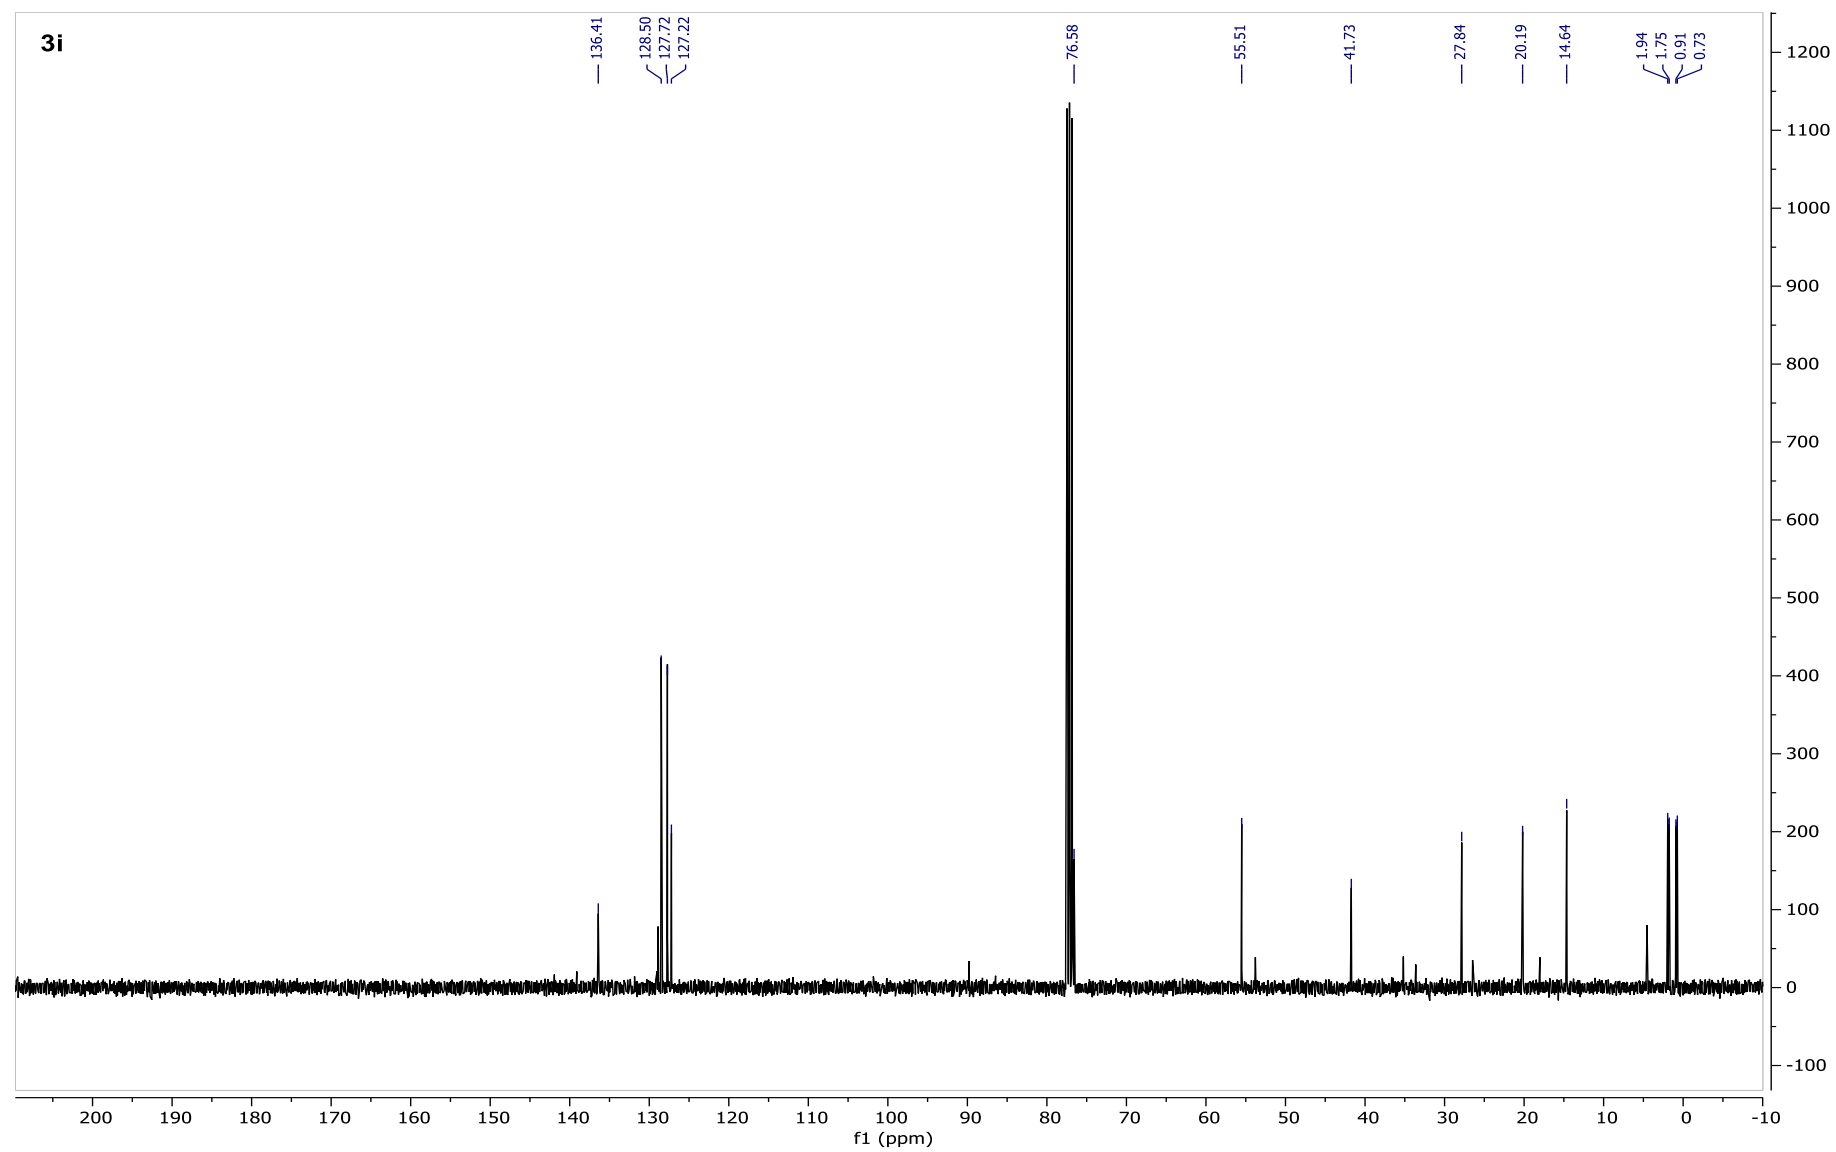

**1-Nitro-3-propylidene-2,3,3a,4,5,9b-hexahydro-1H-cyclopenta[a]naphthalene (7): <sup>1</sup>H NMR (500 MHz, CDCl<sub>3</sub>):**

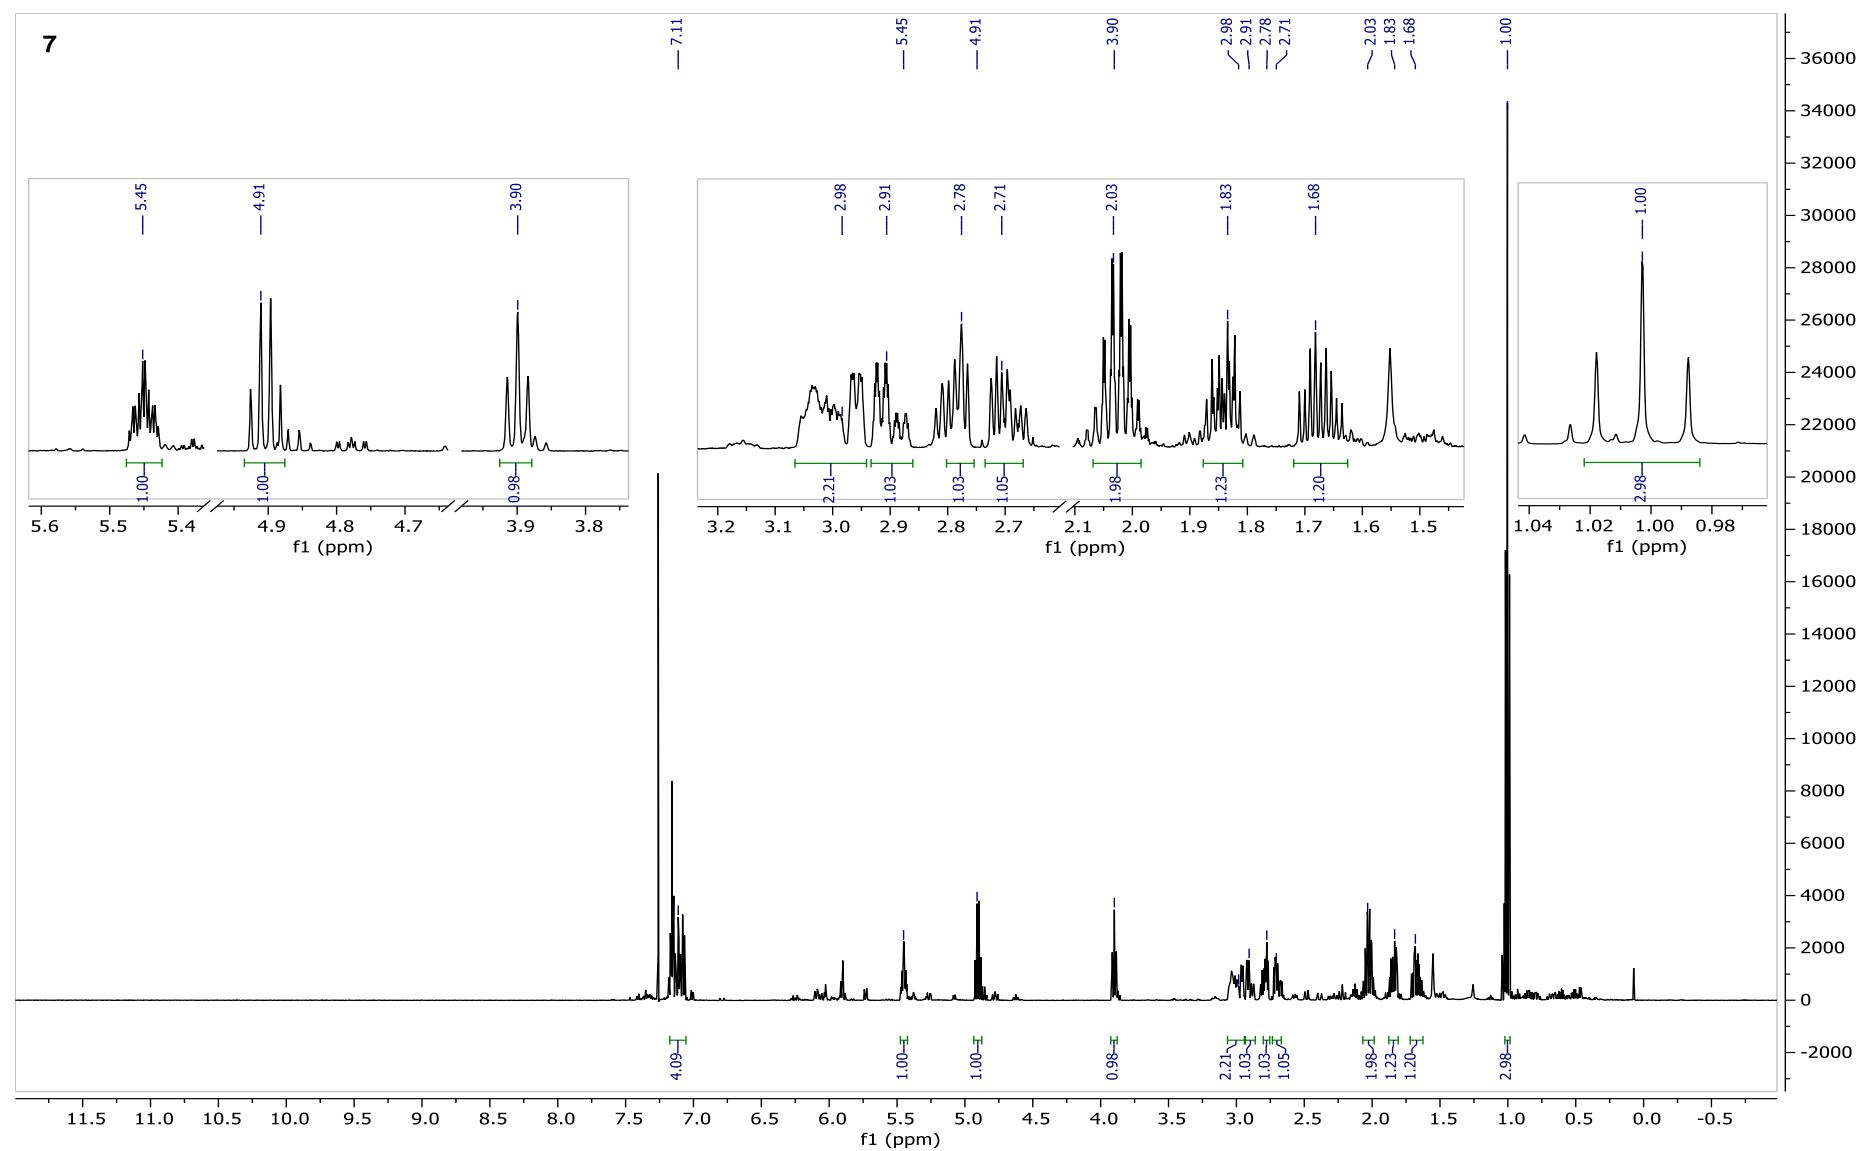

<sup>13</sup>C NMR (126 MHz, CDCl<sub>3</sub>):

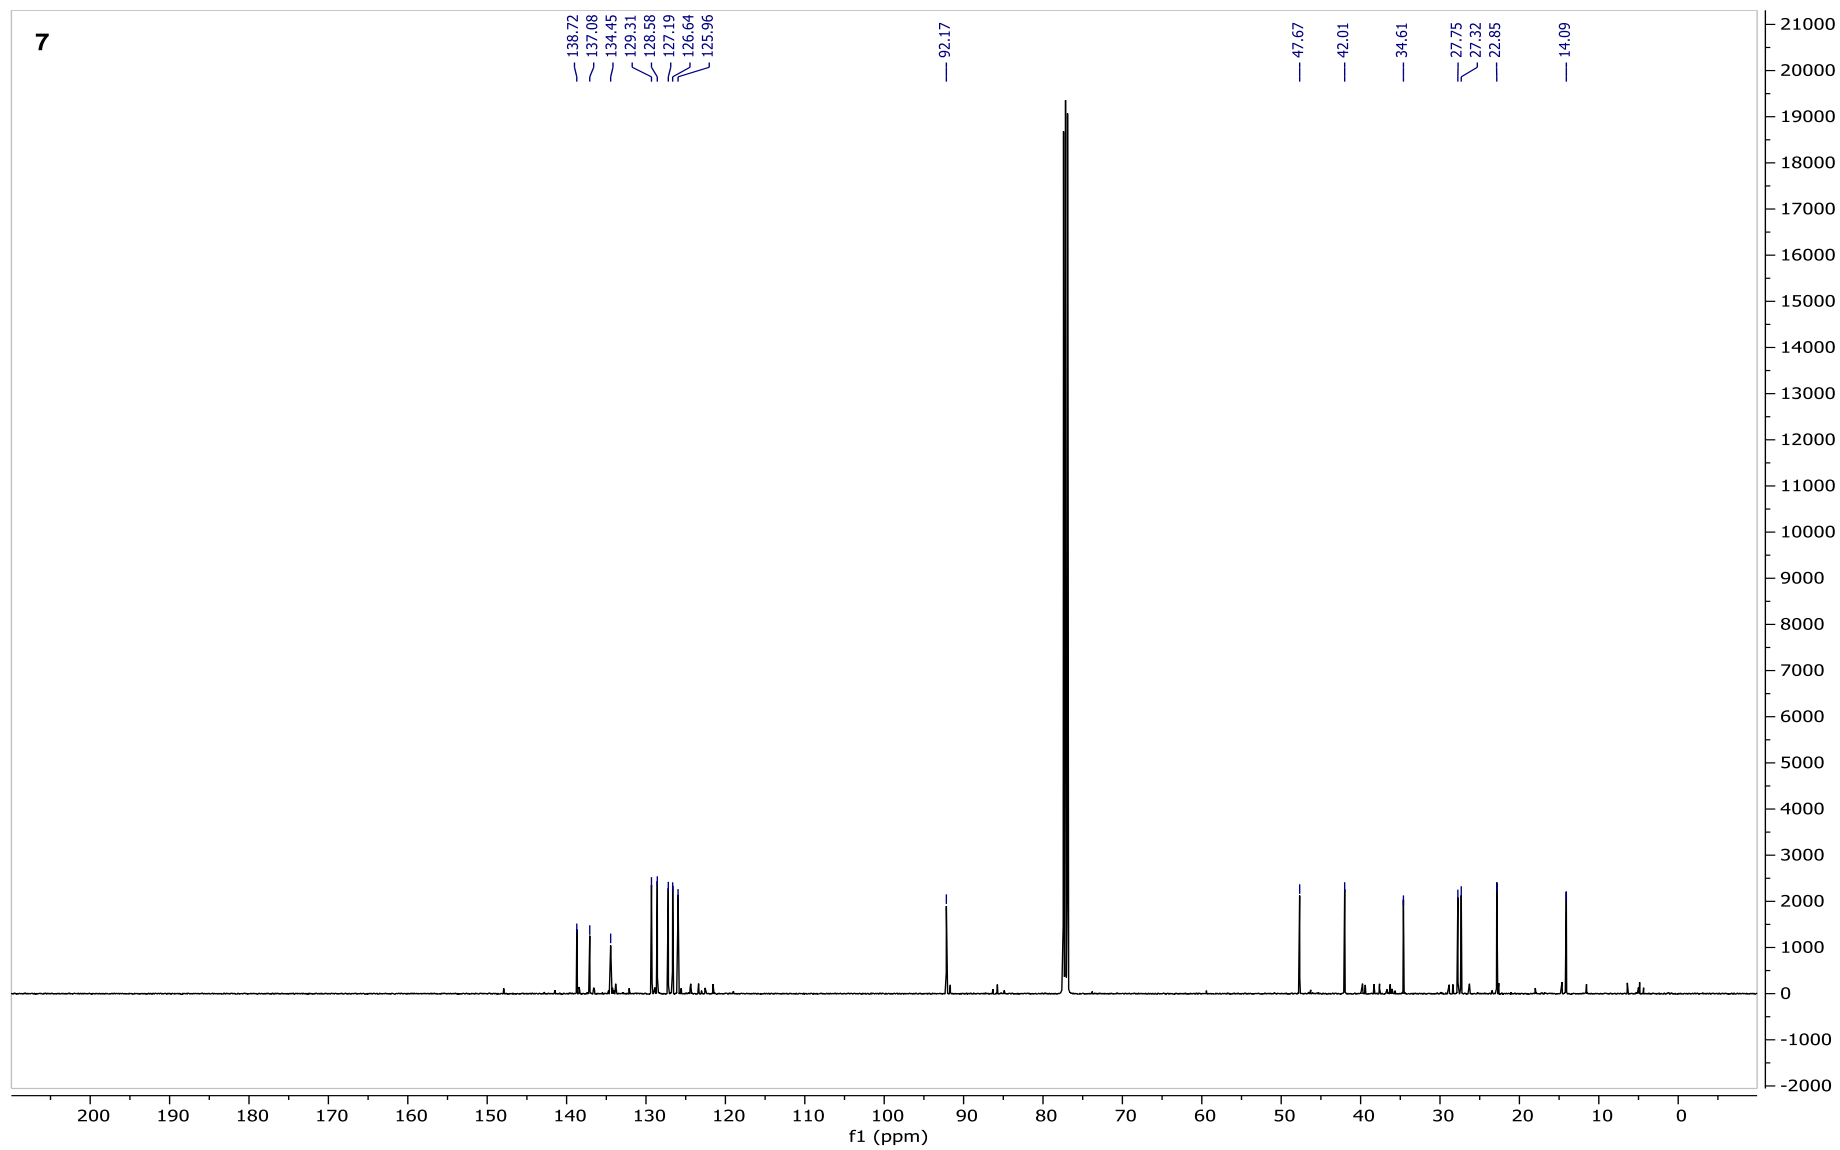

2,2,3,3-Tetramethyl-4-phenylcyclobutan-1-amine (4):  $^1\text{H}$  NMR (400 MHz,  $\text{CDCl}_3$ ):

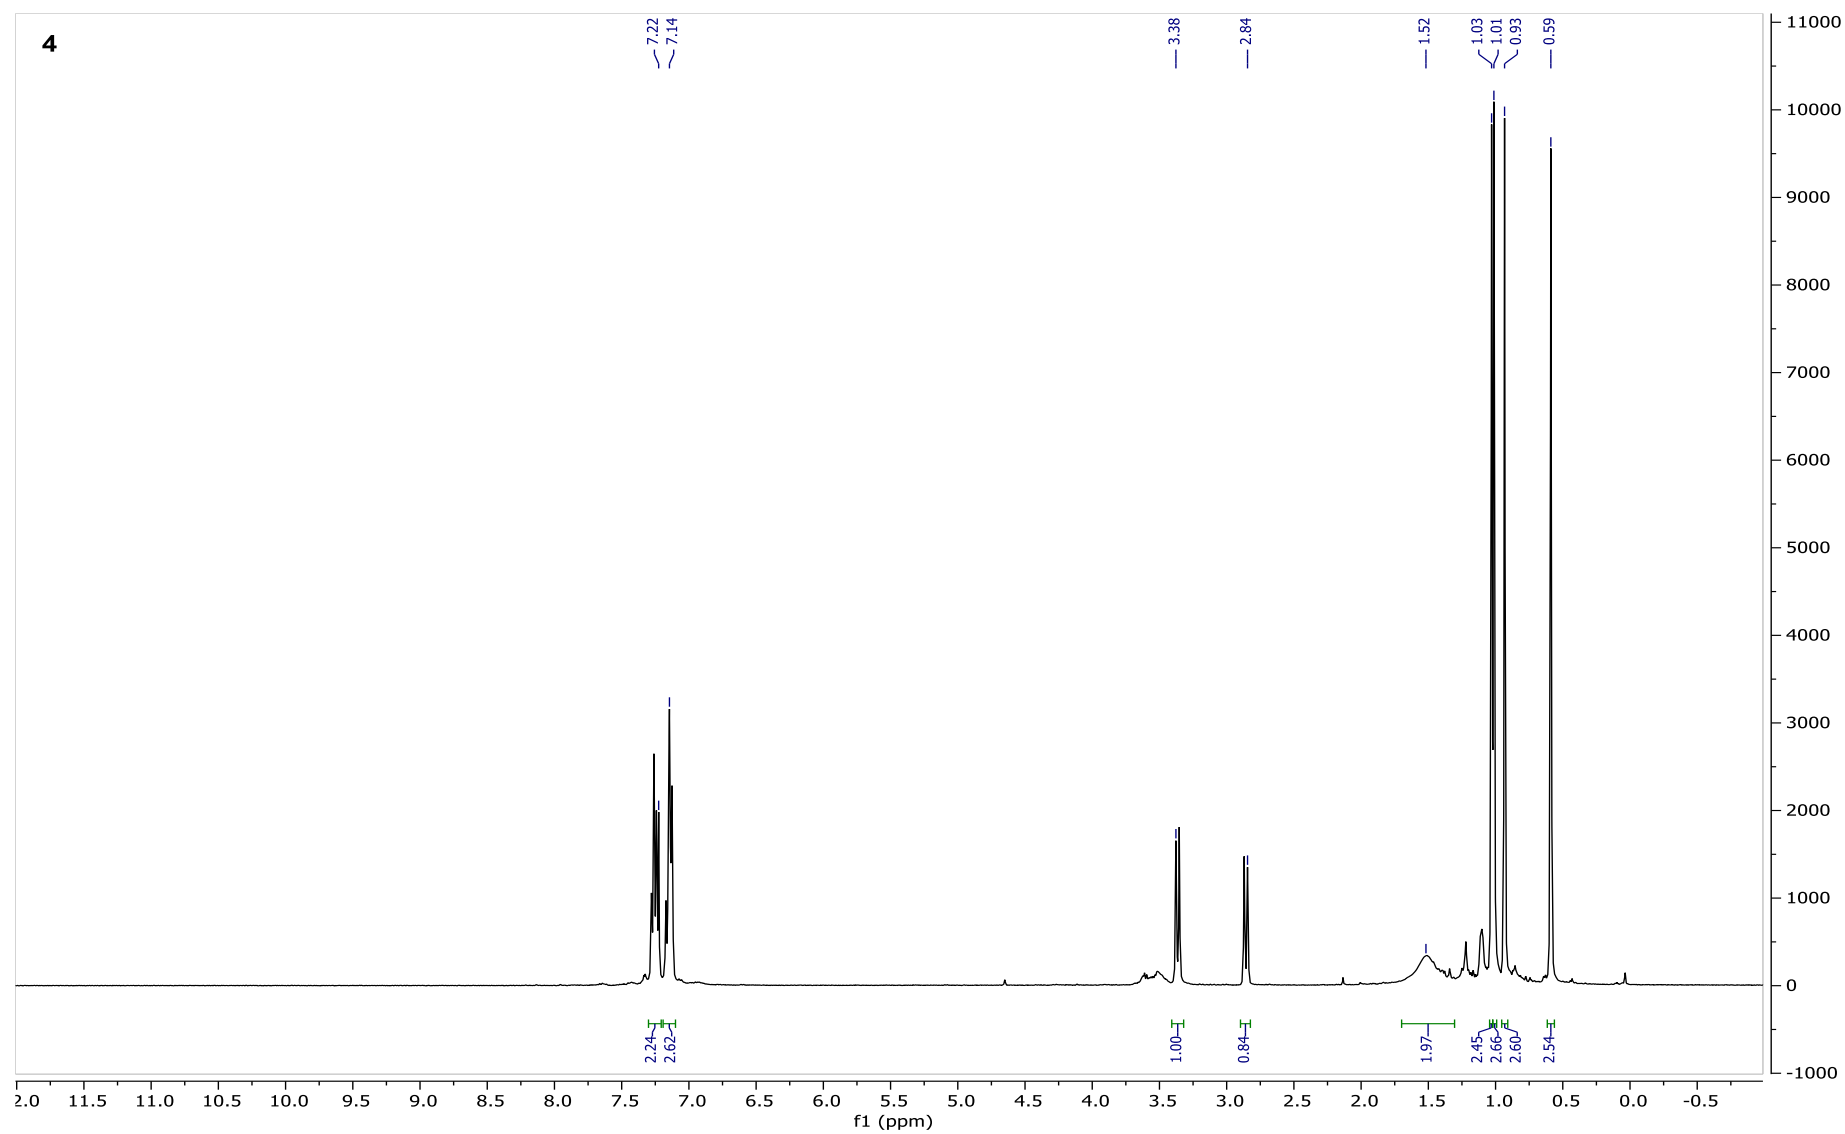

<sup>13</sup>C NMR (101 MHz, CDCl<sub>3</sub>):

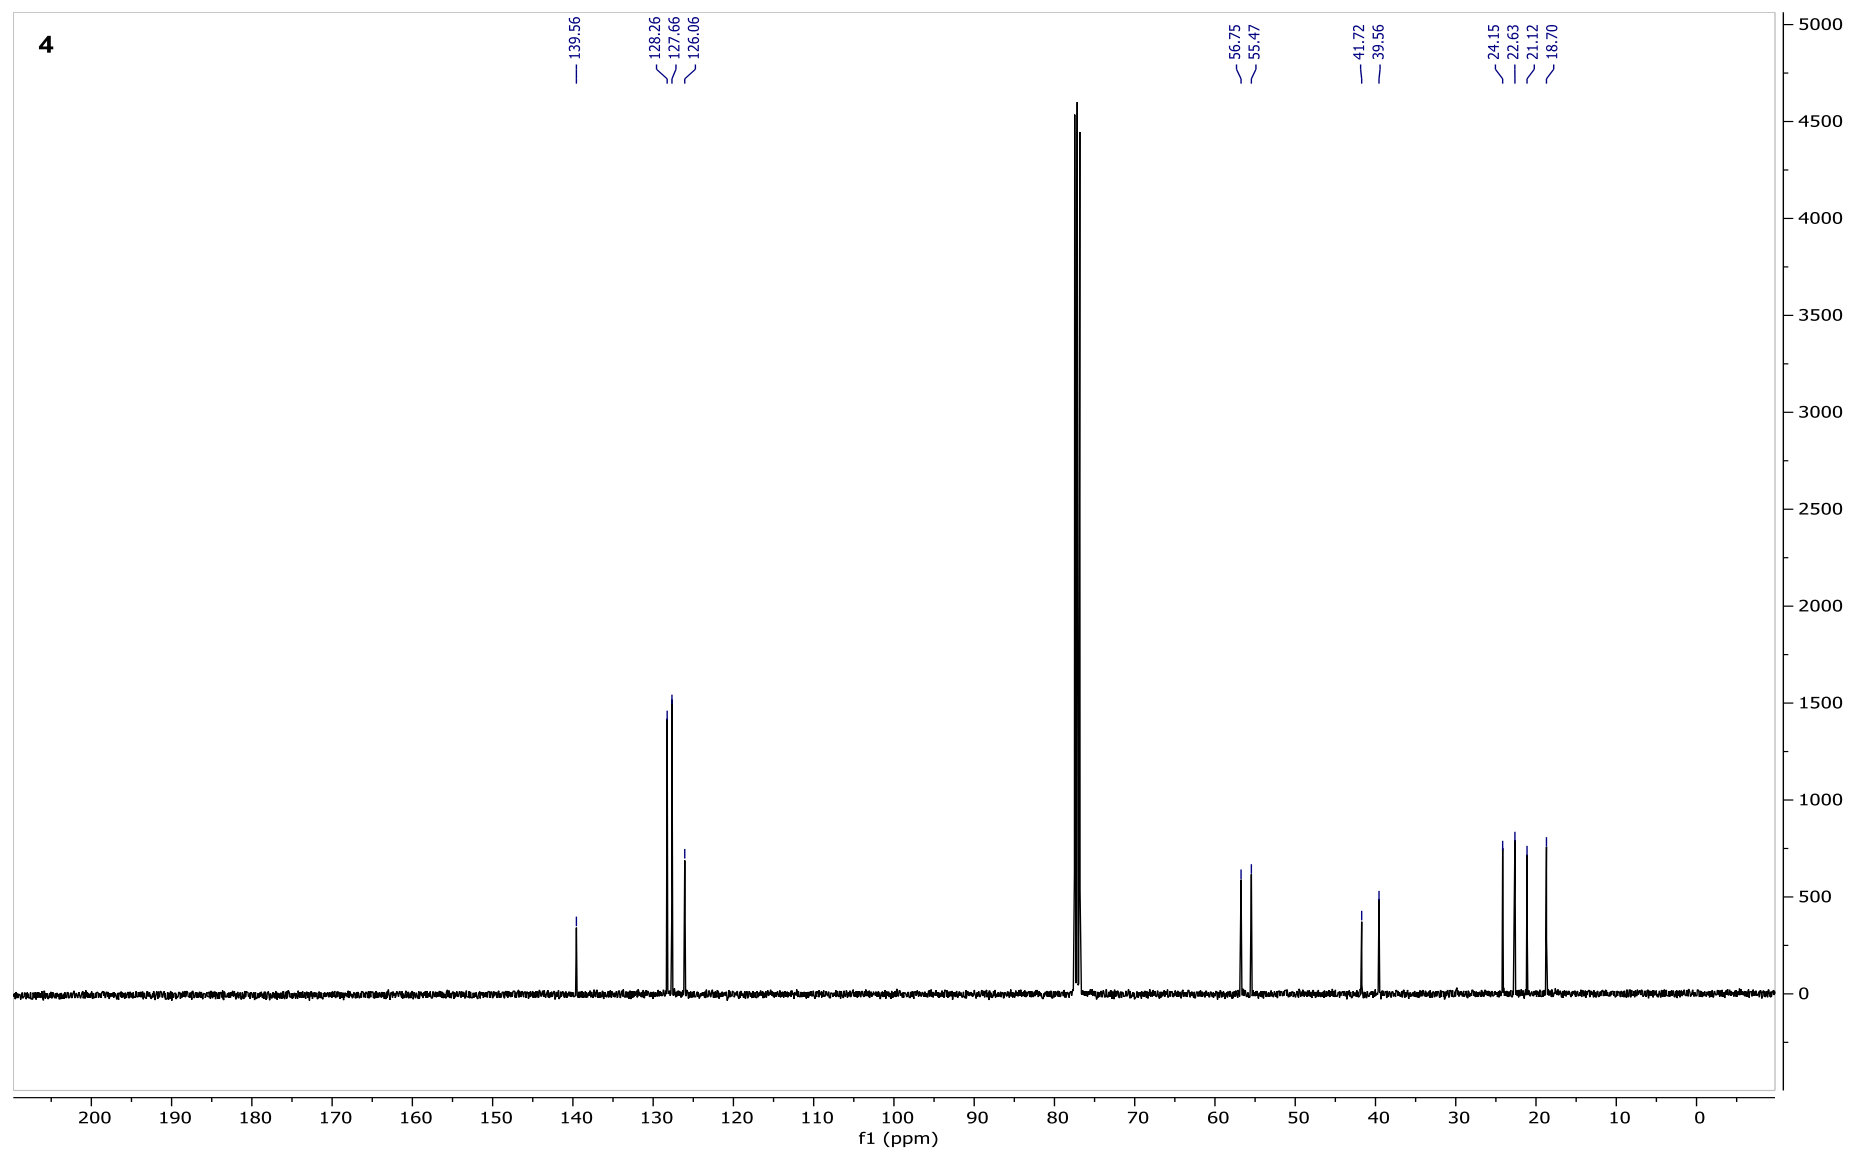

(2',2'-dicyclopropyl-4'-nitrocyclobutyl)benzene:  $^1\text{H}$  NMR (400 MHz,  $\text{CDCl}_3$ ):

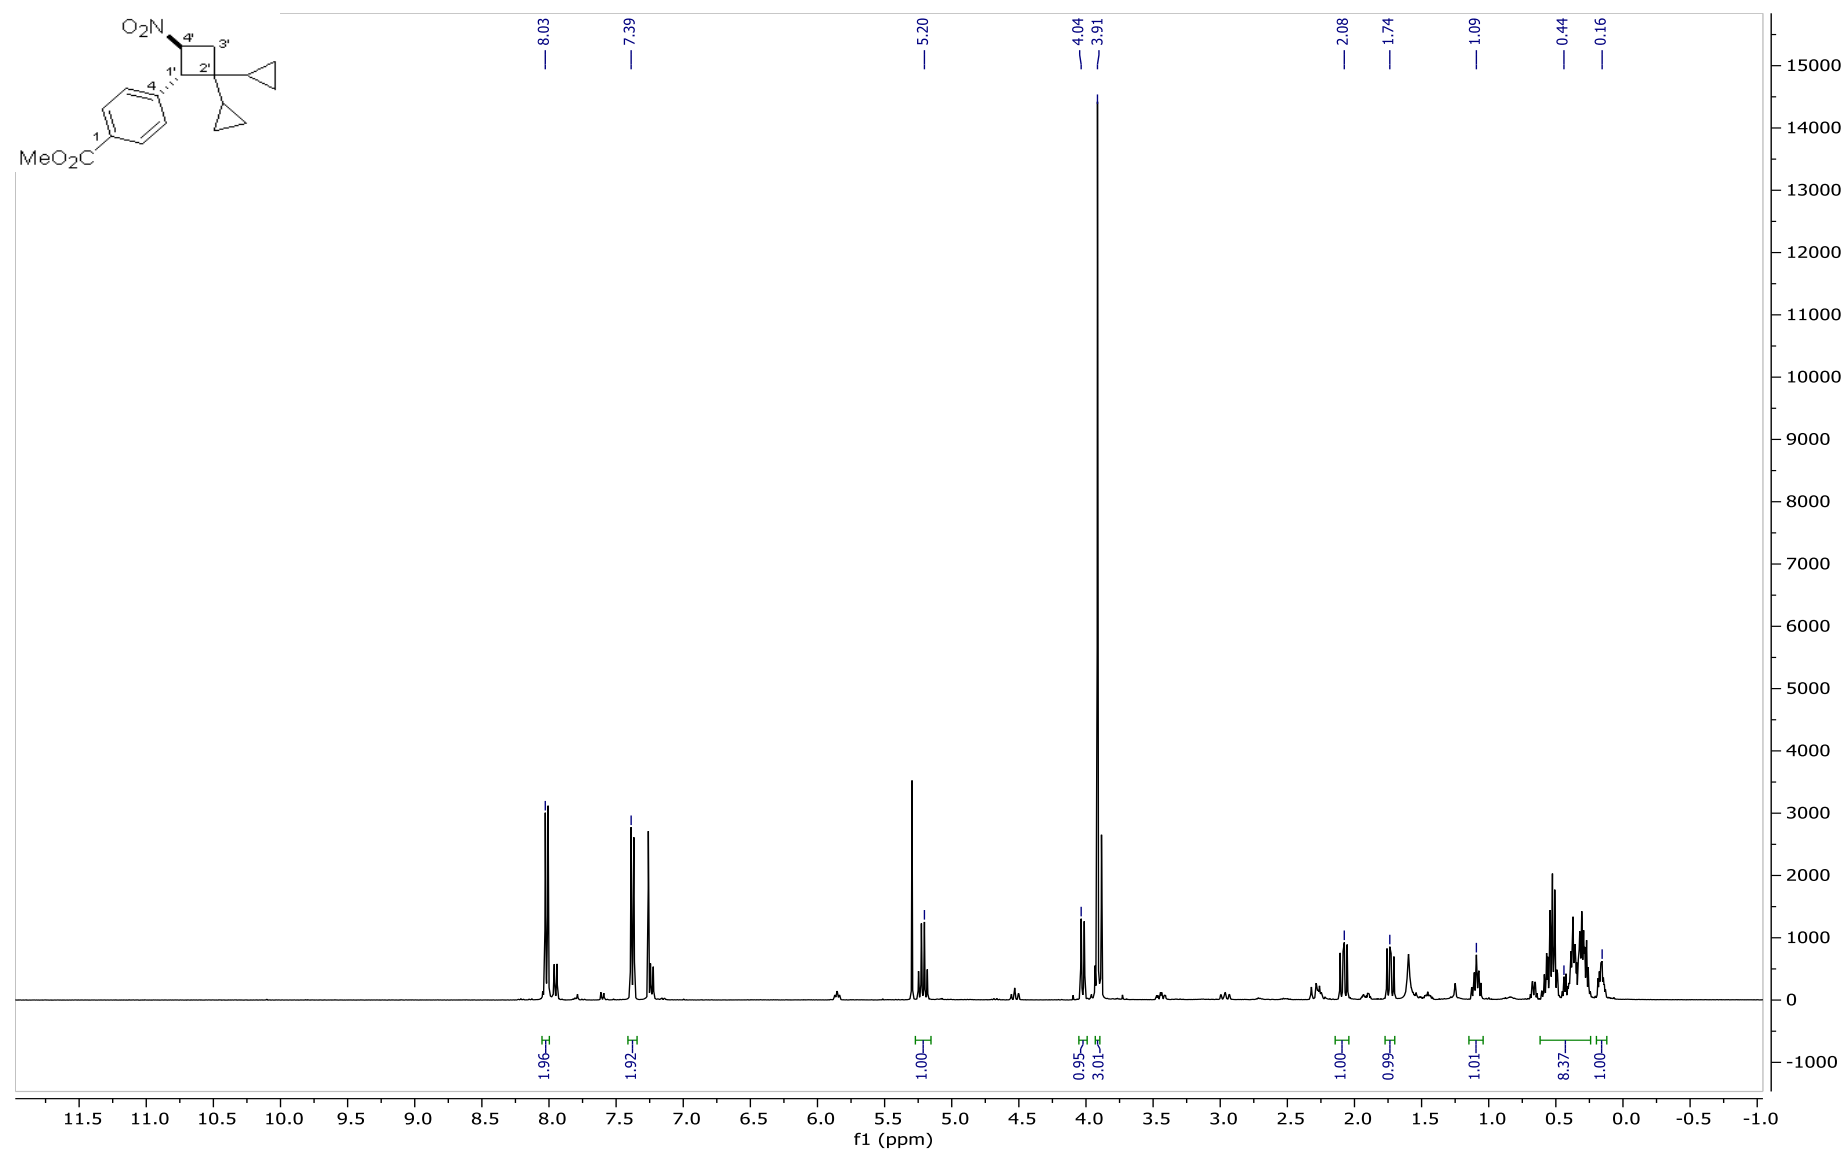

<sup>13</sup>C NMR (101 MHz, CDCl<sub>3</sub>):

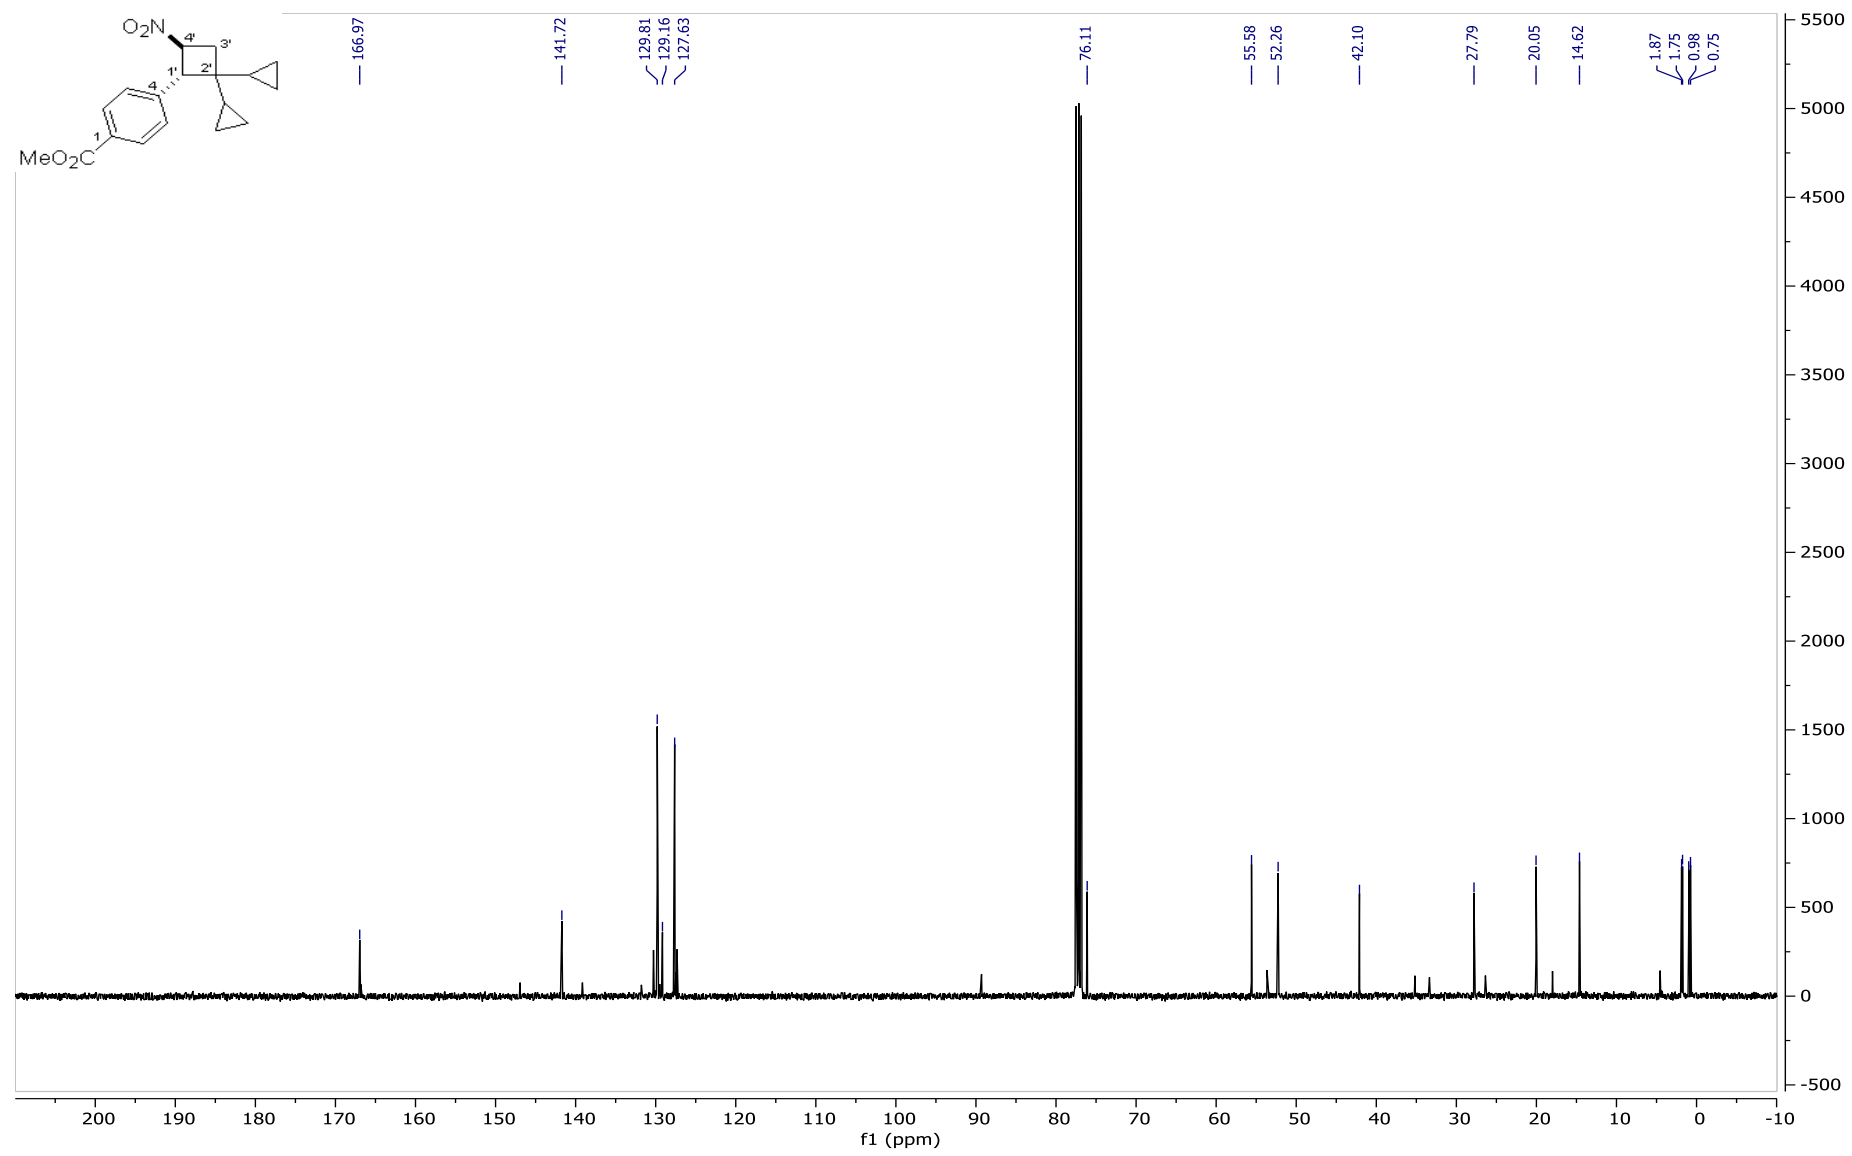

**Methyl (E)-1-nitro-3-propylidene-2,3,3a,4,5,9b-hexahydro-1H-cyclopenta[a]naphthalene-7-carboxylate (8):  $^1\text{H}$  NMR (500 MHz,  $\text{CDCl}_3$ ):**

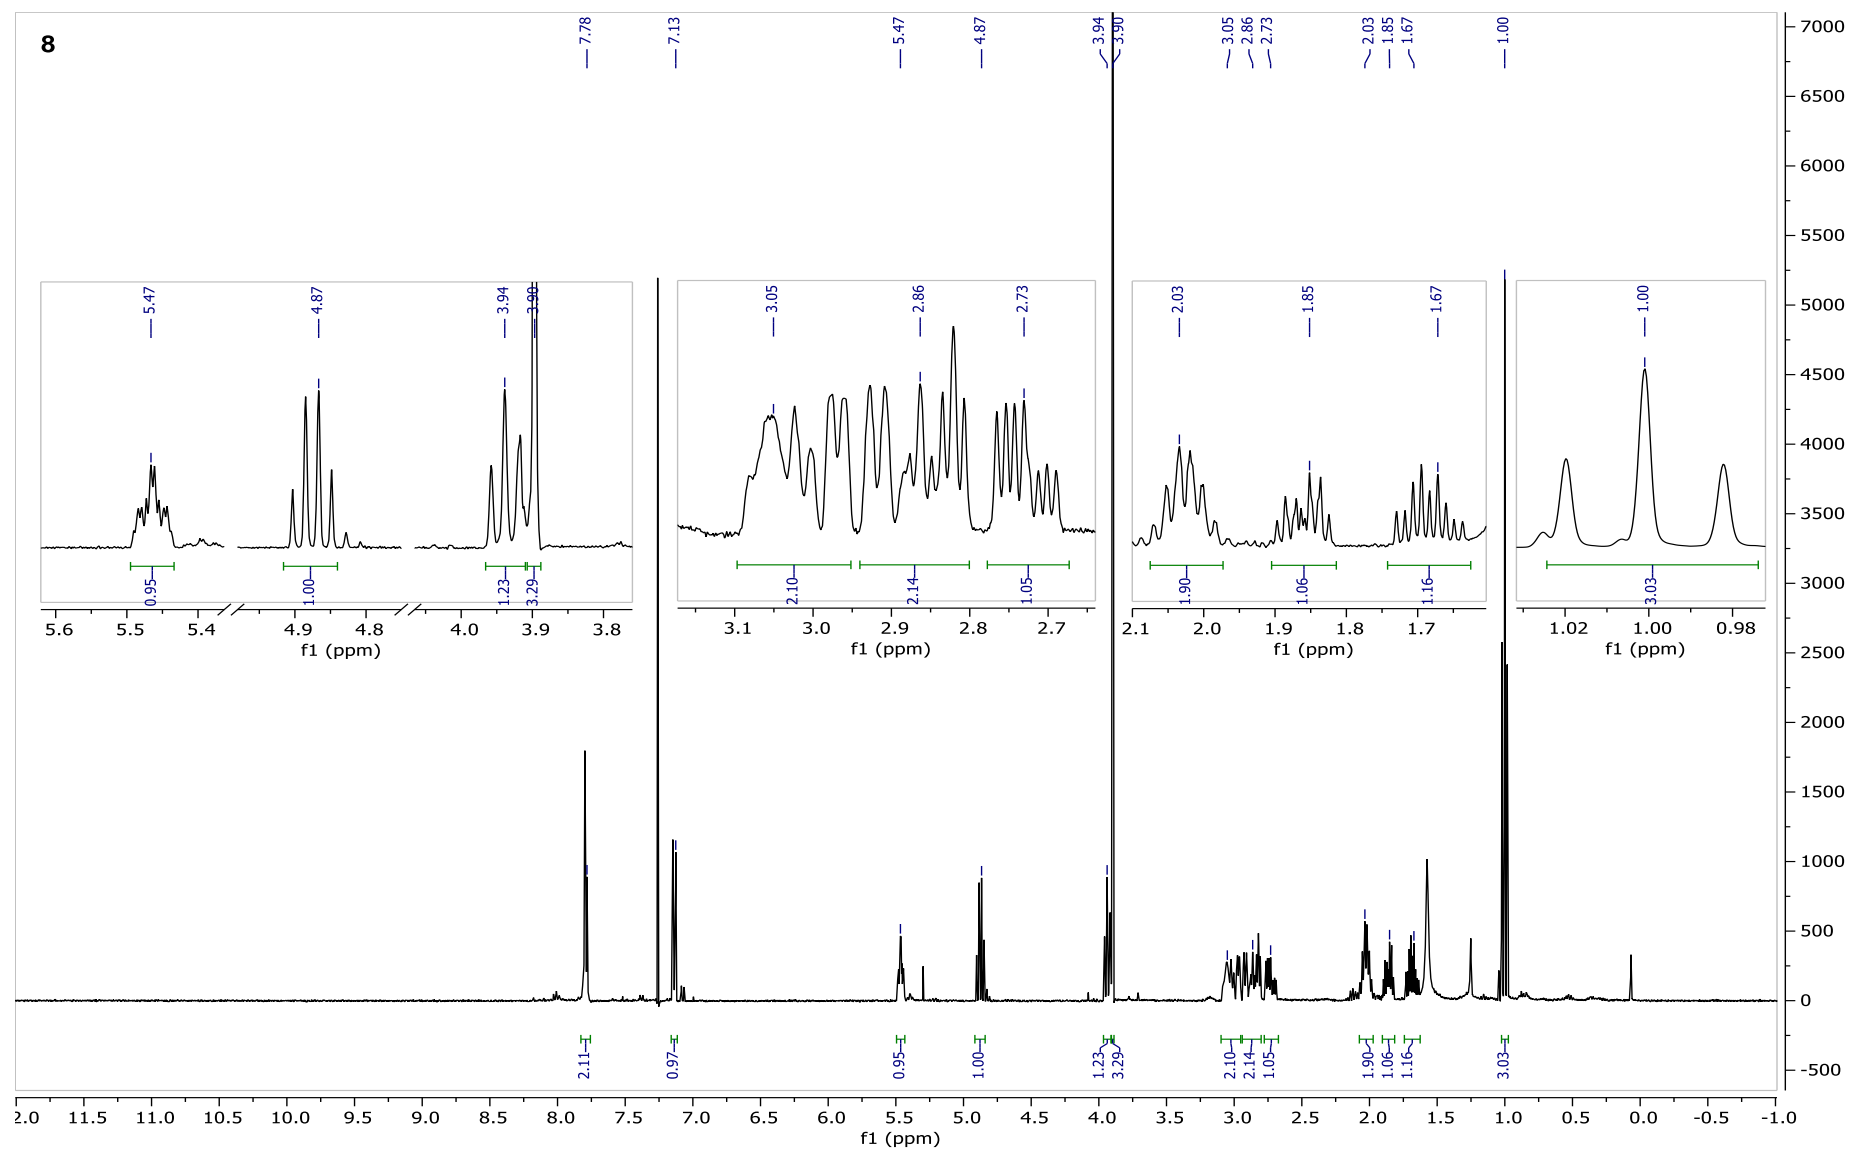



<sup>13</sup>C NMR (126 MHz, CDCl<sub>3</sub>):

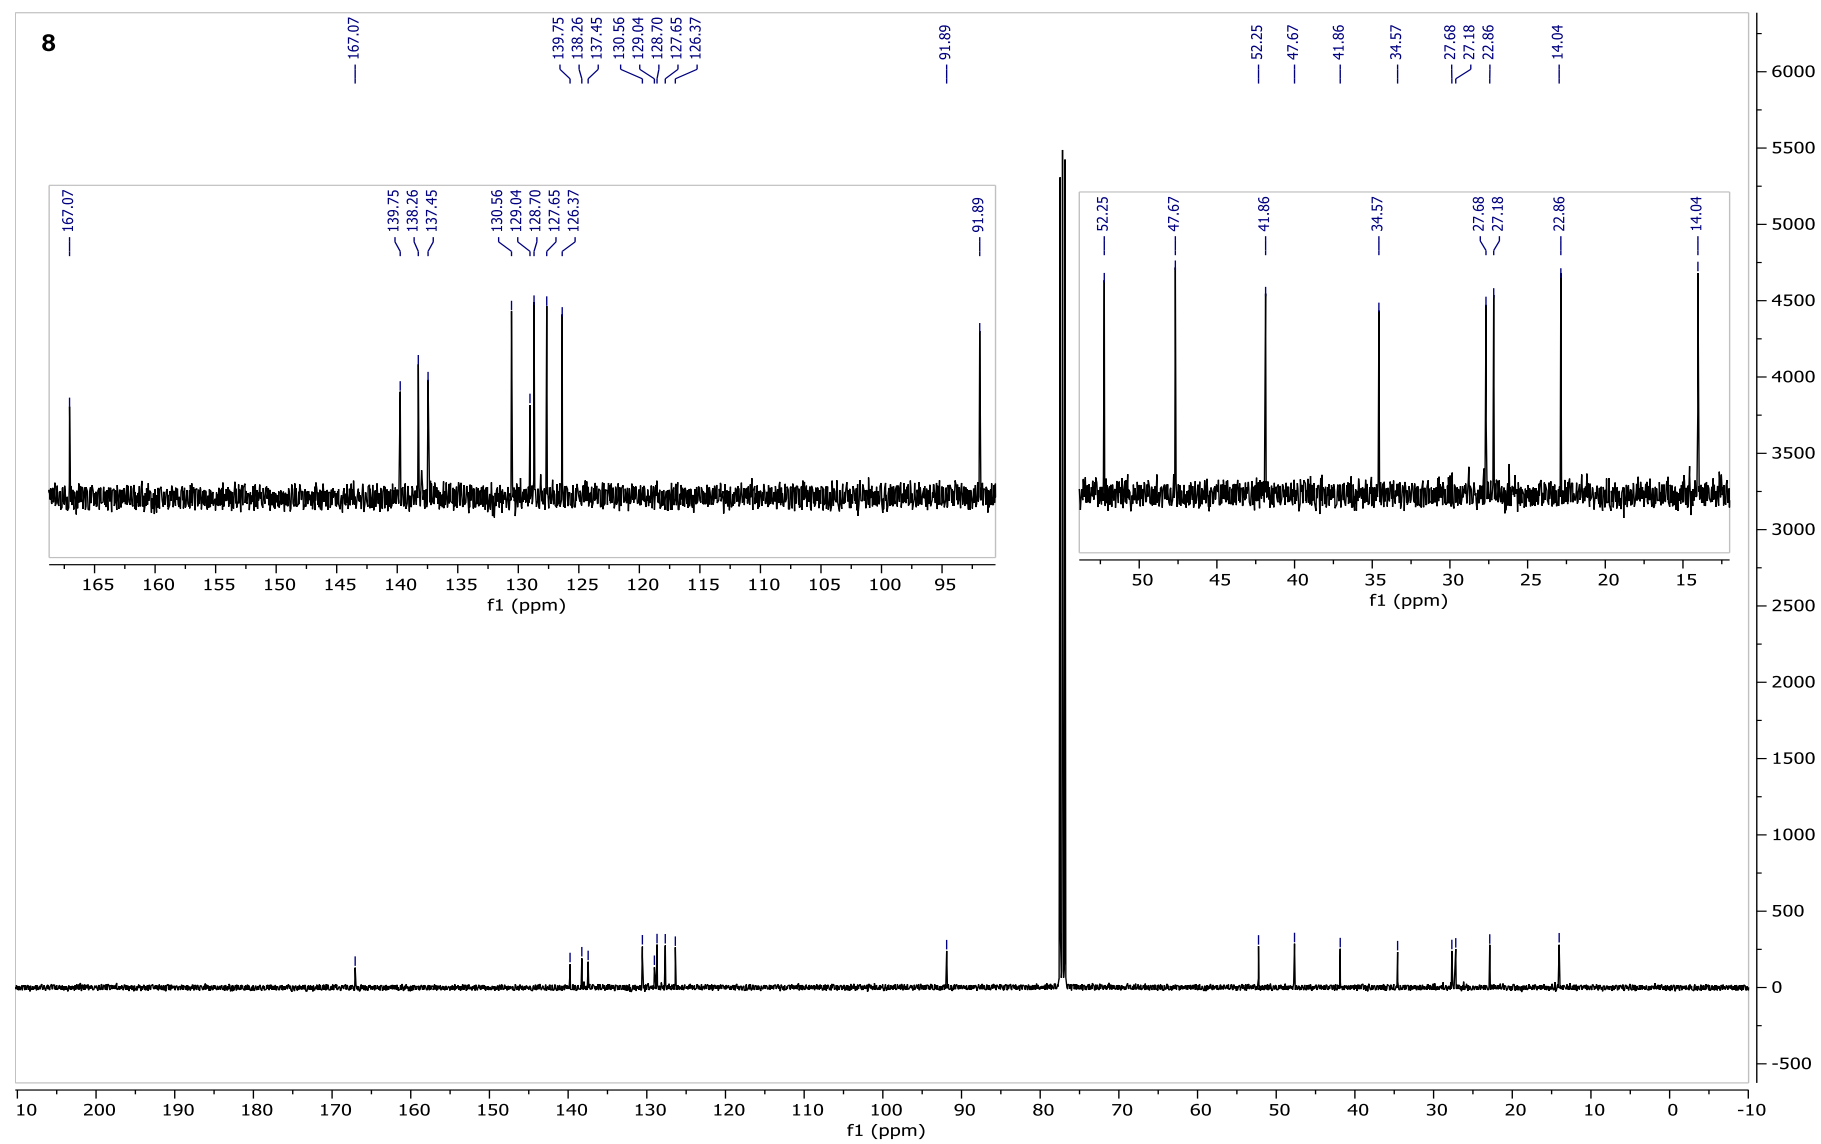

**1-(2',2'-Dicyclopropyl-4'-nitrocyclobutyl)-benzene-2,3,4,5,6-*d*<sub>5</sub>: <sup>1</sup>H NMR (400 MHz, CDCl<sub>3</sub>):**

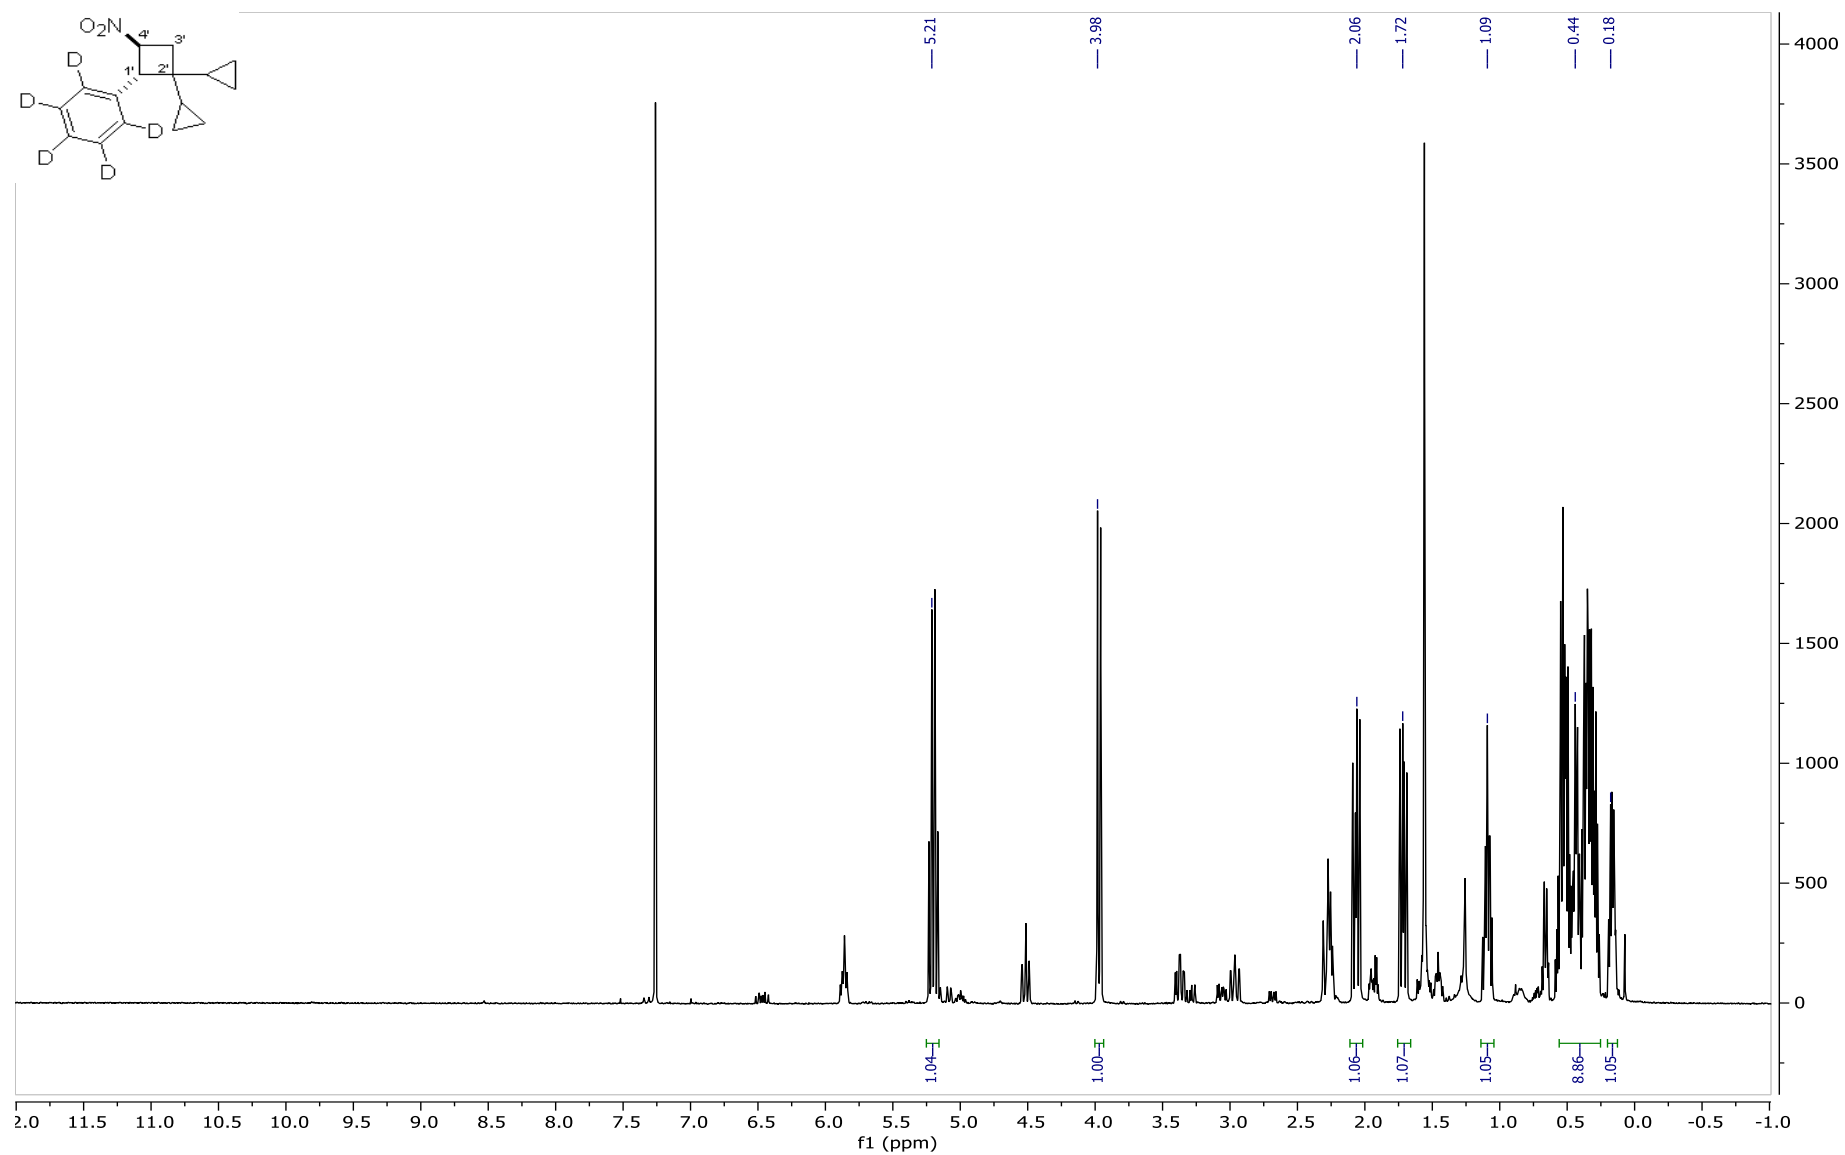

<sup>13</sup>C NMR (101 MHz, CDCl<sub>3</sub>):

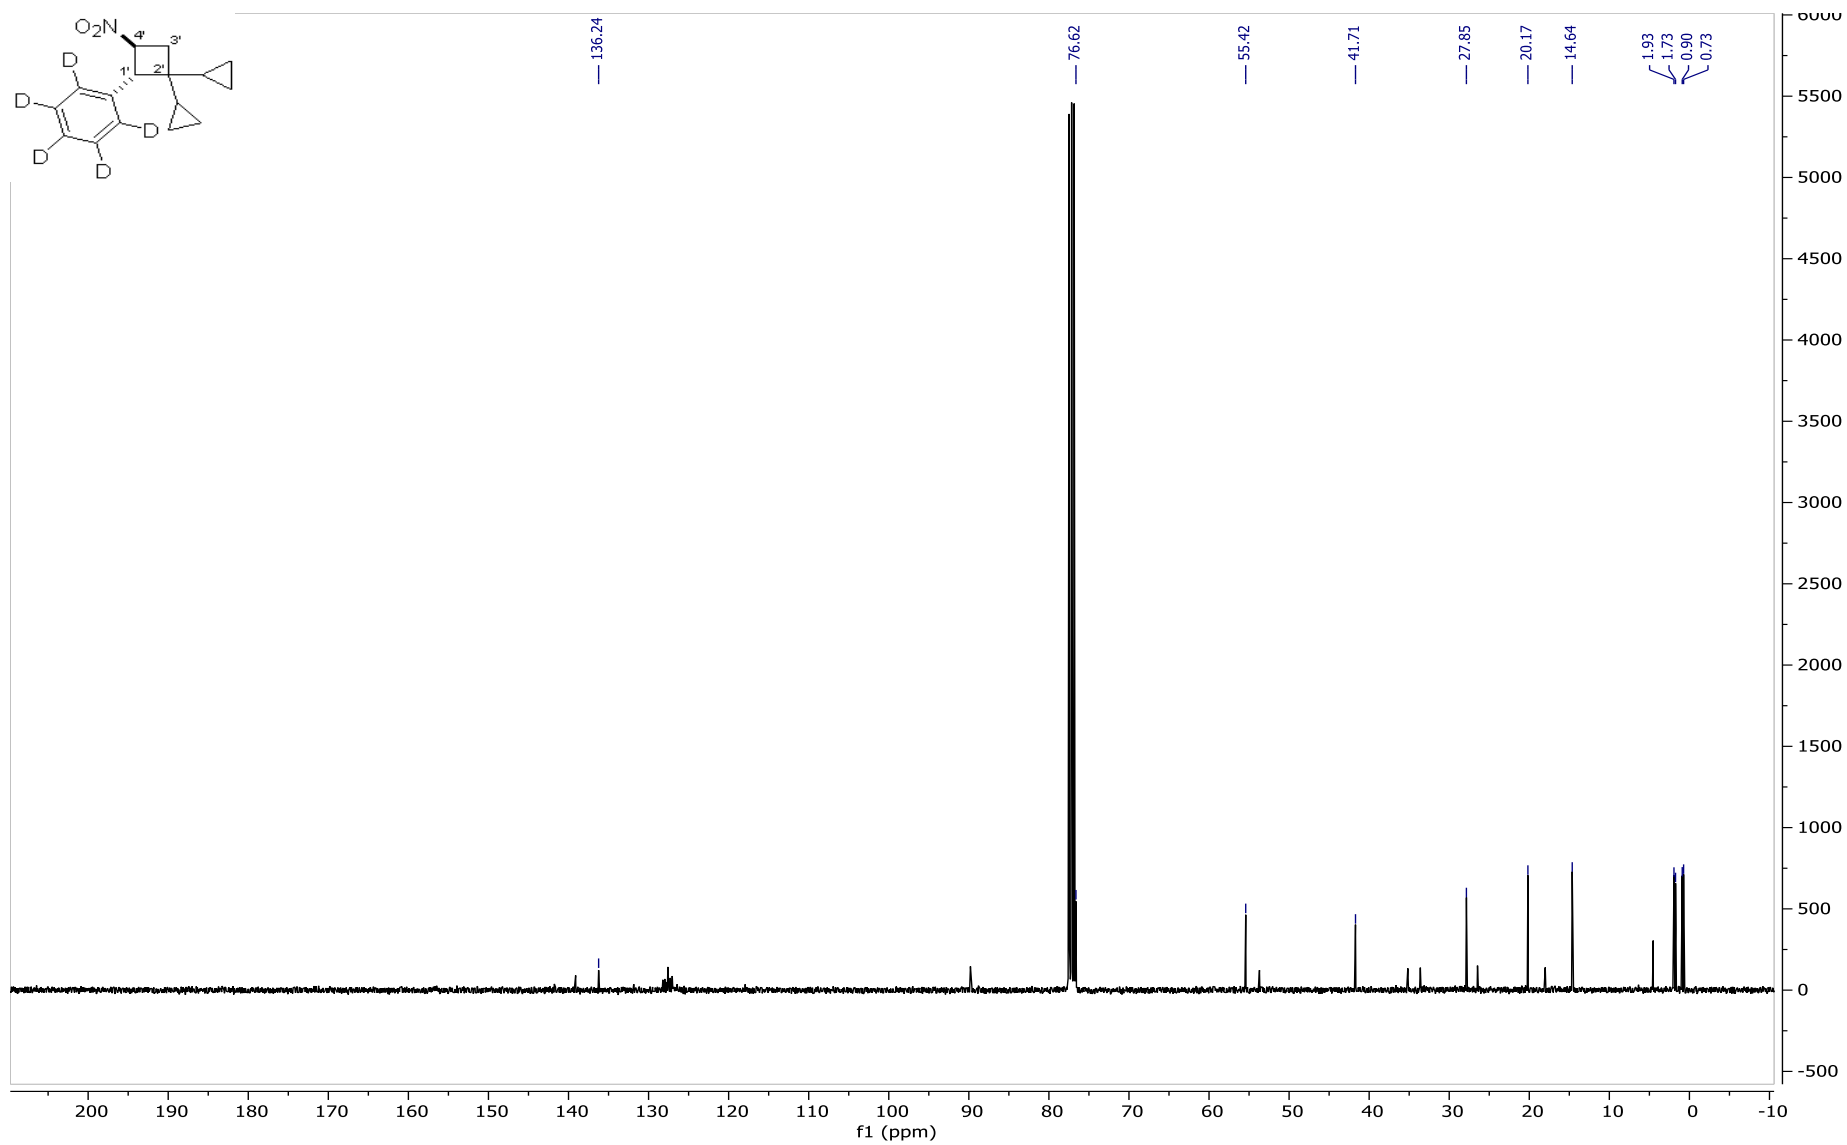

**(E)-1-nitro-3-(propylidene-3-d)-2,3,3a,4,5,9b-hexahydro-1H-cyclopenta[a]naphthalene-6,7,8,9-d<sub>4</sub> (7-d<sub>5</sub>): <sup>1</sup>H NMR (400 MHz, CDCl<sub>3</sub>):**

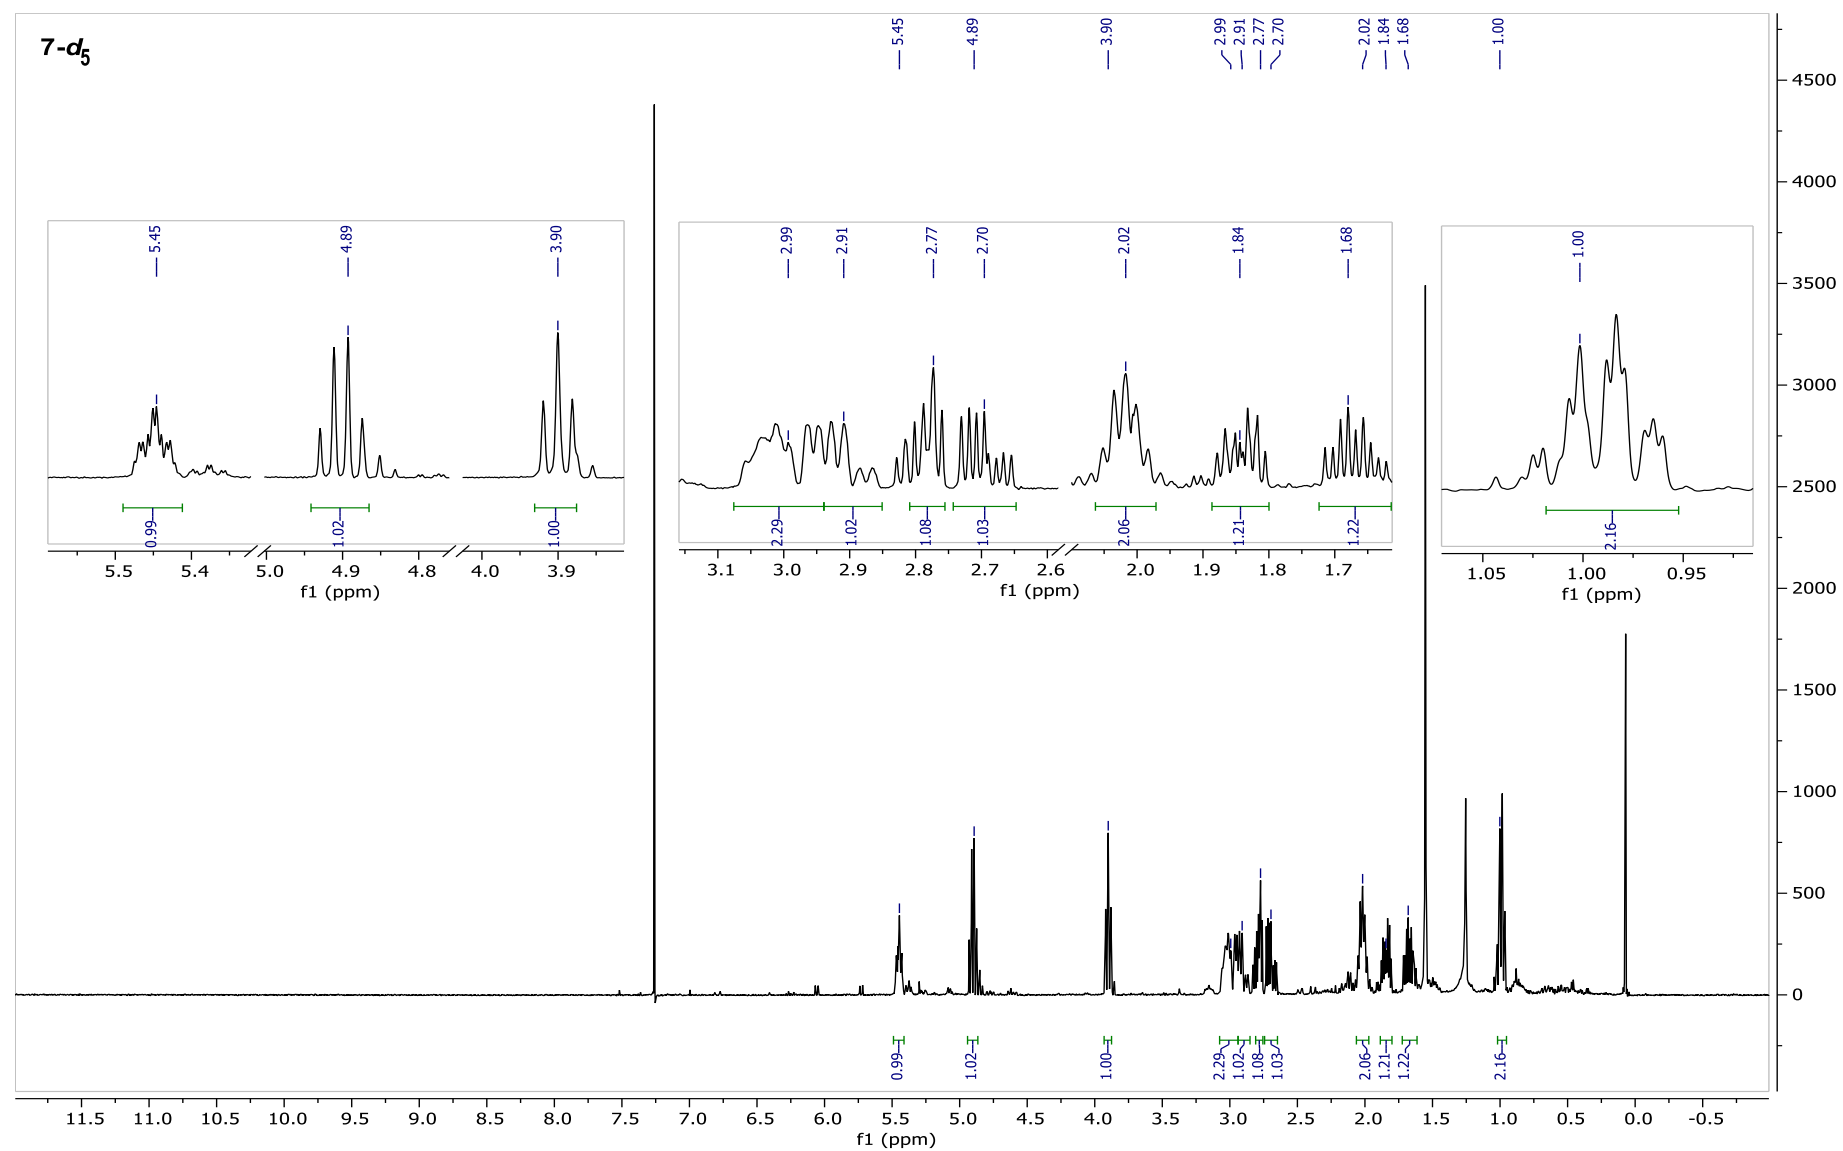

<sup>13</sup>C NMR (101 MHz, CDCl<sub>3</sub>):

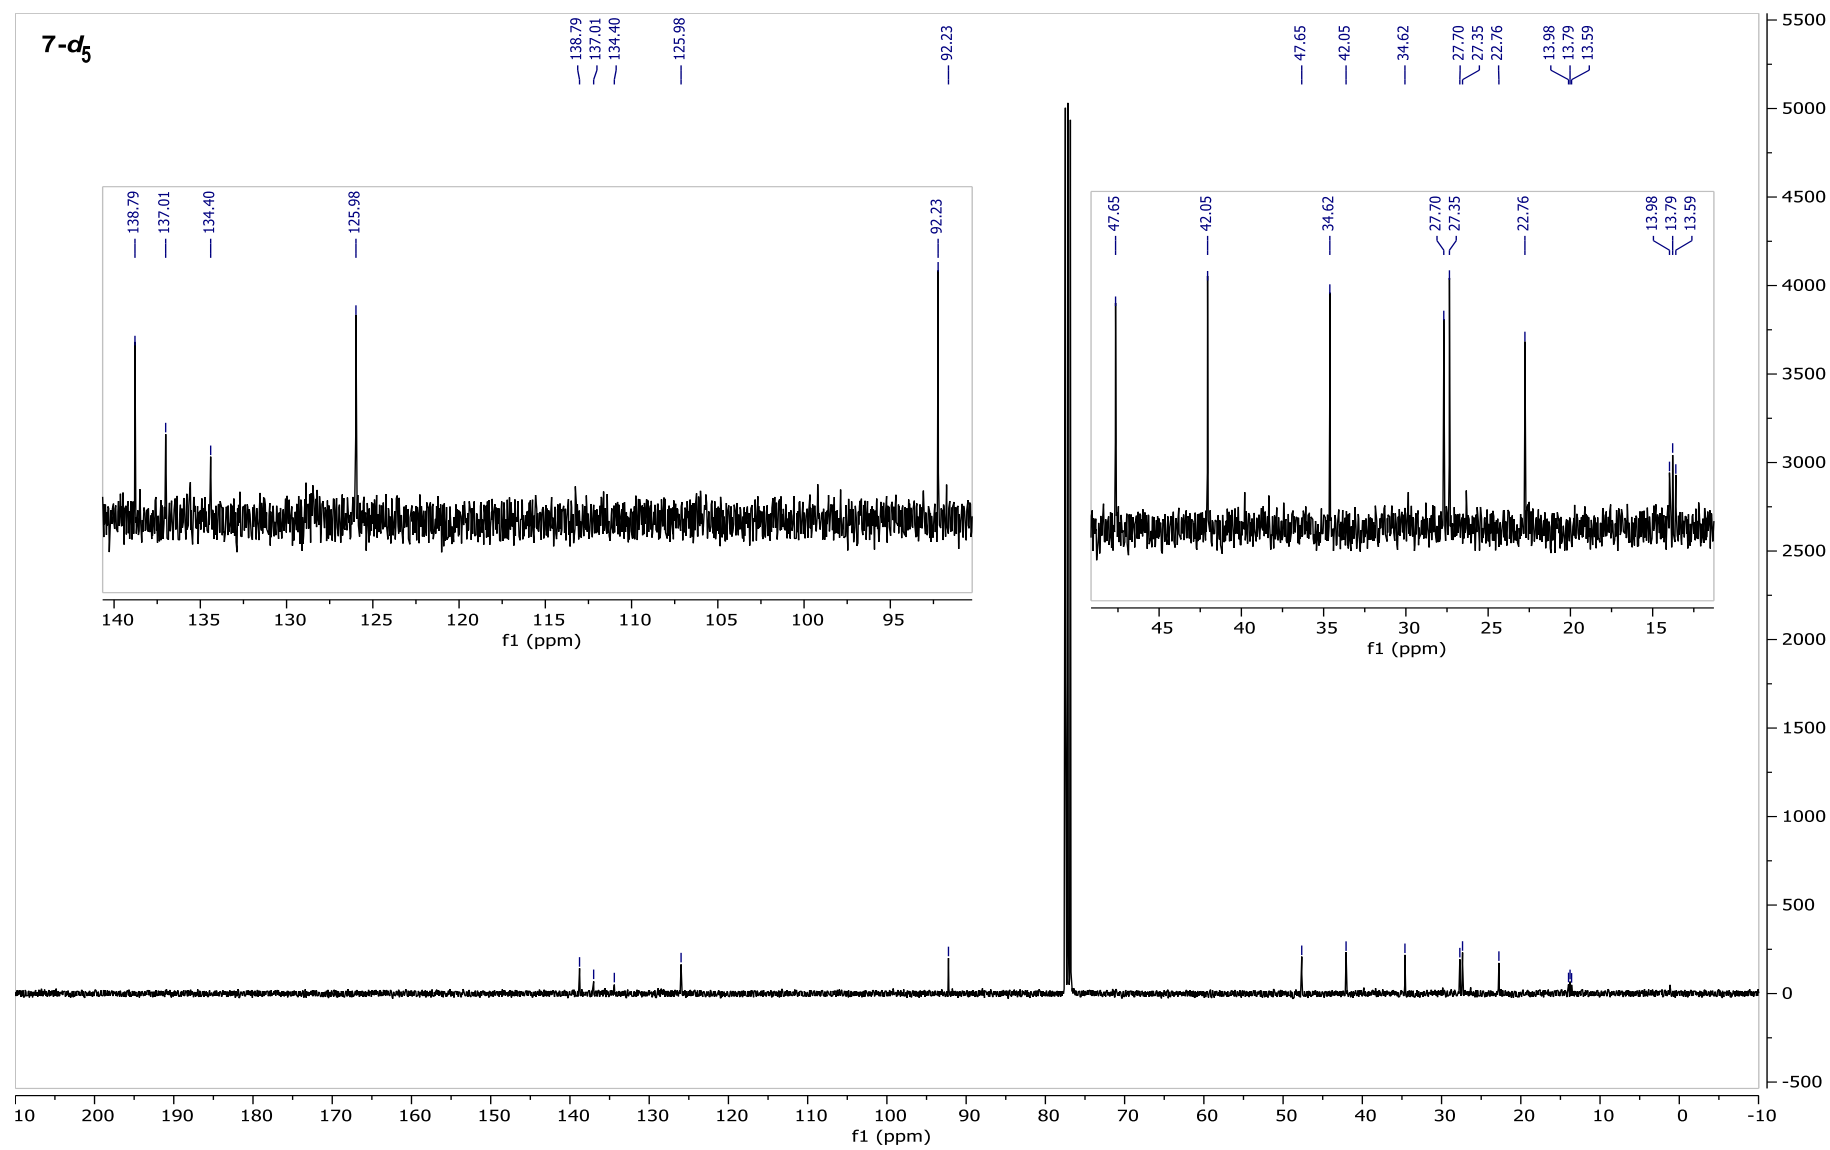



## 10. X-ray Crystallographic Details

Data were collected on a single crystal x-ray diffractometer equipped with a CMOS detector (Bruker APEX III,  $\kappa$ -CMOS), a TXS rotating anode with MoK $_{\alpha}$  radiation ( $\lambda = 0.71073 \text{ \AA}$ ) and a Helios optic using the APEX3 software package.<sup>[21]</sup> Measurements were performed on single crystals coated with perfluorinated ether. The crystals were fixed on top of a kapton micro sampler and frozen under a stream of cold nitrogen. A matrix scan was used to determine the initial lattice parameters. Reflections were corrected for Lorentz and polarisation effects, scan speed, and background using SAINT.<sup>[22]</sup> Absorption correction, including odd and even ordered spherical harmonics was performed using SADABS.<sup>[22]</sup> Space group assignments were based upon systematic absences, E statistics, and successful refinement of the structures. The structures were solved using SHELXT with the aid of successive difference Fourier maps, and were refined against all data using SHELXL-2014 in conjunction with SHELXLE.<sup>[23-25]</sup> Hydrogen atoms were calculated in ideal positions as follows: Methyl hydrogen atoms were refined as part of rigid rotating groups, with a C–H distance of  $0.98 \text{ \AA}$  and  $U_{\text{iso(H)}} = 1.5 \cdot U_{\text{eq(C)}}$ . Other H atoms were placed in calculated positions and refined using a riding model, with methylene and aromatic C–H distances of  $0.99 \text{ \AA}$  and  $0.95 \text{ \AA}$ , respectively, other C–H distances of  $1.00 \text{ \AA}$ , all with  $U_{\text{iso(H)}} = 1.2 \cdot U_{\text{eq(C)}}$ . Non-hydrogen atoms were refined with anisotropic displacement parameters. Full-matrix least-squares refinements were carried out by minimizing  $\Sigma w(F_o^2 - F_c^2)^2$  with the SHELXL weighting scheme.<sup>[23]</sup> Neutral atom scattering factors for all atoms and anomalous dispersion corrections for the non-hydrogen atoms were taken from *International Tables for Crystallography*.<sup>[26]</sup> Images of the crystal structures were generated with Mercury and PLATON.<sup>[27,28]</sup> CCDC 1915359 contains the supplementary crystallographic data for this paper. These data are provided free of charge by The Cambridge Crystallographic Data Centre.

## Compound 8 (CCDC 1915359)

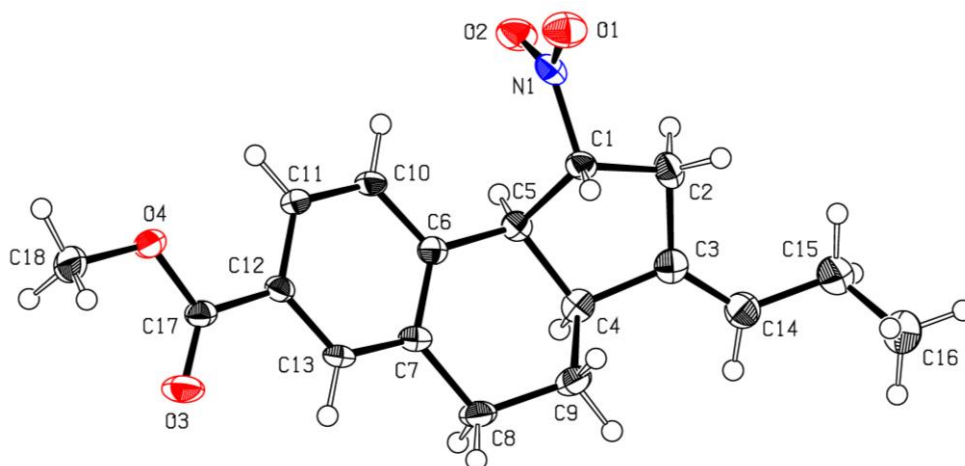

Diffraction operator C. Jandl  
scanspeed 60 s per frame  
dx 40 mm  
1364 frames measured in 9 data sets  
phi-scans with  $\Delta\phi = 0.5$   
omega-scans with  $\Delta\omega = 0.5$

### Crystal data

$C_{18}H_{21}NO_4$

$M_r = 315.36$

Monoclinic,  $P2_1/n$

Hall symbol:  $-P 2_1n$

$a = 17.209(3) \text{ \AA}$

$b = 5.0340(8) \text{ \AA}$

$c = 19.434(3) \text{ \AA}$

$\beta = 104.812(5)^\circ$

$V = 1627.6(5) \text{ \AA}^3$

$Z = 4$

$F(000) = 672$

### Data collection

Bruker Photon CMOS  
diffractometer

$D_x = 1.287 \text{ Mg m}^{-3}$

Melting point: ? K

Mo  $K\alpha$  radiation,  $\lambda = 0.71073 \text{ \AA}$

Cell parameters from 6968 reflections

$\theta = 2.5\text{--}25.6^\circ$

$\mu = 0.09 \text{ mm}^{-1}$

$T = 100 \text{ K}$

Needle, colourless

$0.81 \times 0.10 \times 0.08 \text{ mm}$

2946 independent reflections



Radiation source: TXS rotating anode 2185 reflections with  $I > 2\sigma(I)$

Helios optic monochromator  $R_{\text{int}} = \underline{0.097}$

Detector resolution: 16 pixels  $\text{mm}^{-1}$   $\theta_{\text{max}} = \underline{25.3^\circ}$ ,  $\theta_{\text{min}} = \underline{2.5^\circ}$

phi- and omega-rotation scans  $h = \underline{-20}$  20

Absorption correction: multi-scan  
SADABS 2016/2, Bruker  $k = \underline{-6}$  5

$T_{\text{min}} = \underline{0.593}$ ,  $T_{\text{max}} = \underline{0.745}$   $l = \underline{-23}$  23

32123 measured reflections

### *Refinement*

Refinement on  $F^2$  Secondary atom site location: difference  
Fourier map

Least-squares matrix: full Hydrogen site location: inferred from  
neighbouring sites

$R[F^2 > 2\sigma(F^2)] = \underline{0.051}$  H-atom parameters constrained

$wR(F^2) = \underline{0.126}$   $W = 1/[\Sigma^2(\text{FO}^2) + (0.0548\text{P})^2 + 1.1721\text{P}]$   
WHERE P = (FO<sup>2</sup> + 2FC<sup>2</sup>)/3

$S = \underline{1.03}$   $(\Delta/\sigma)_{\text{max}} \leq \underline{0.001}$

2946 reflections  $\Delta\rho_{\text{max}} = \underline{0.27}$  e  $\text{\AA}^{-3}$

210 parameters  $\Delta\rho_{\text{min}} = \underline{-0.24}$  e  $\text{\AA}^{-3}$

0 restraints Extinction correction: none

0 constraints Extinction coefficient: -

Primary atom site location: intrinsic phasing

## 11. Determination of Quantum Yield

The quantum yield of the [2+2] photocycloaddition reaction was determined for substrate **1a** with 2,3-dimethyl-2-butene. The initial rate was determined by measuring the yield of product **2a** using calibrated GC.

### Setup

A 380 nm LED<sup>1</sup>, operated at constant current (700 mA) was imaged by a pair of best-form quartz lenses into the cuvette (resulting image size: 8.0 mm x 8.0 mm<sup>2</sup>). The cuvette holder is equipped with a magnetic stir bar drive (2mag, cuvetteMixdrive1). The intensity of (residual) light passing through the cuvette was measured using a calibrated setup consisting of a cosine-corrector, a 600  $\mu\text{m}$  fiber and an Ocean Optics USB4000 spectrometer.<sup>[29,30]</sup>

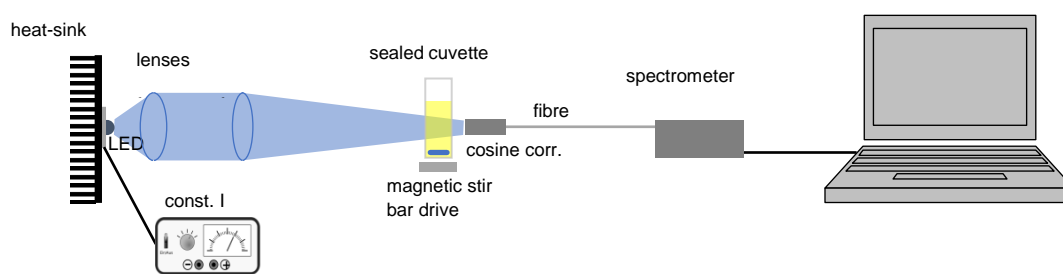

**Figure S4:** Setup used for the determination of the quantum yield.

Using this setup, the light-intensity available for a photochemical reaction can be determined with the above mentioned spectrometer to be  $357 \pm 5 \text{ W/m}^2$  (23 mW integral power at the sample) after thermal equilibration of the LED (30 minutes), which corresponds (380 nm) to  $7.26 \cdot 10^{-8} \text{ Einstein} \cdot \text{s}^{-1}$ . This value was verified using a chemical actinometer.

*All operations described below were conducted in a “black box” under red-light conditions using the phenyl glyoxylate actinometer.*<sup>[31,32]</sup>

A degassed solution of phenylglyoxylic acid in 3:1 acetonitrile:water ( $V=3 \text{ mL}$ ,  $c=25 \text{ mM}$ ) was transferred under inert gas conditions (Ar) into the cuvette used for the quantum yield determination (10x10 mm; see below). As described in detail earlier,<sup>[29]</sup> the most reliable way to determine both, the intensity of residual light not being absorbed by the actinometer solution as well as the remaining phenylglyoxylate is using the fibre coupled USB4000 spectrometer,

<sup>1</sup> A 380 nm LED was chosen to maximise the overlap integral of substrate **1a** and the light source. The precision in the quantification of absorbed photons was too low for the 424 nm LED used in the preparative examples. For the combination of **1a** and 2,3-dimethyl-2-butene, the yield of a preparative experiment (cf. page SI-23) was determined to be (near) identical in comparison with the outcome using the 424 nm LED.

the cosine corrector of which is placed behind the sample cuvette. From these spectrophotometrically determined conversion values and the respective time resolved optical densities (ranging from 0.55 at  $t=0$  min to 0.34 at 14 min.), the photon flux is calculated in a nonlinear fitting (least square fit) to be  $4.36 \cdot 10^{16} \text{ s}^{-1}$  or  $7.24 \cdot 10^{-8} \text{ Einstein s}^{-1}$  using a reference quantum yield of 0.735.

Taking the uncertainties of the reference quantum yield and the variance of the spectrophotometrically determined conversion of the decarboxylation into account, an error of  $\pm 5\%$  can be estimated.

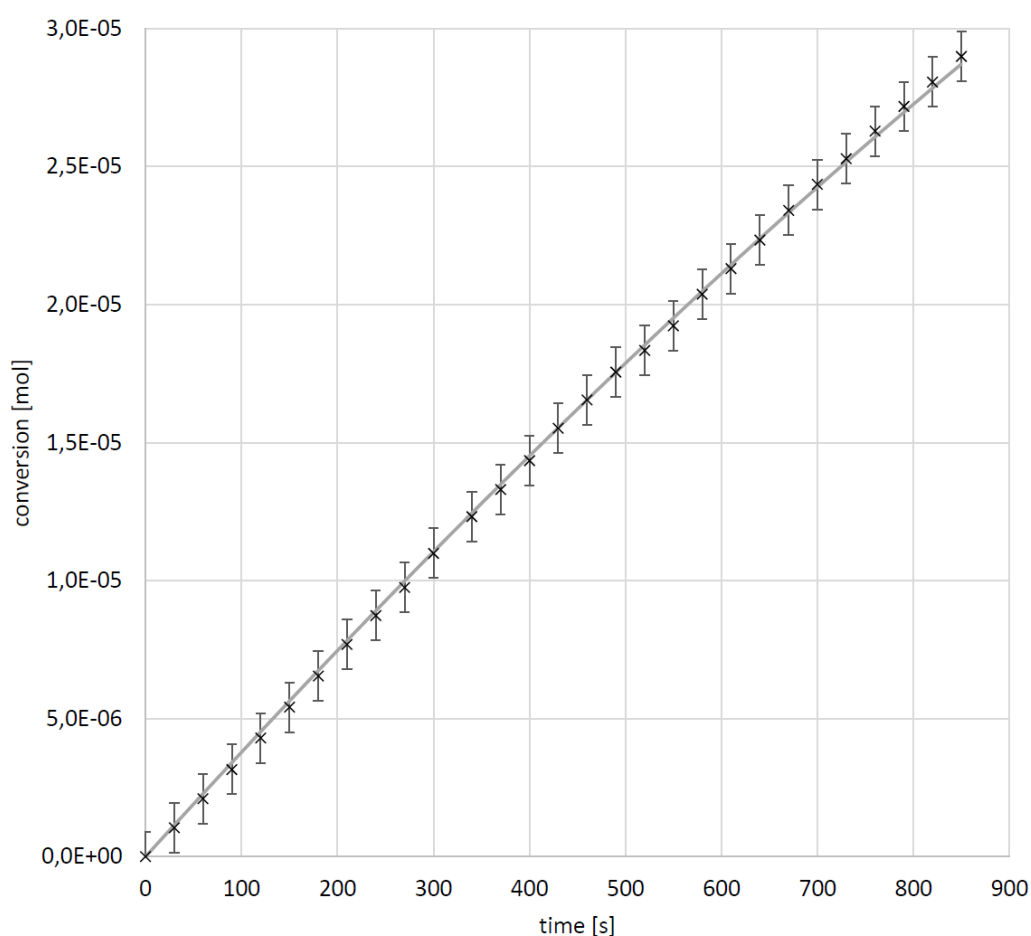

**Figure S5:** Conversion of the Norrish-type-I decarboxylation of phenylglyoxylic acid at 380 nm.

The photocycloaddition reaction was conducted in a sealed cuvette (quartz, 10x10 mm) using 3 mL of a 20.2 mmol/L sample of **1a** and 2,3-dimethyl-2-butene prepared as described on page SI-22 (according to **GP 4**). The sample was irradiated for 60 min, during which the optical density was again monitored continuously using the fibre-coupled spectrometer. After 60

minutes, the GC yield of **2a** was determined as 16.0% (30% conversion), with dodecane as internal standard ( $\tau_R$  (trans-**1a**) = 11.7 min,  $\tau_R$  (cis-**1a**) = 10.9 min,  $\tau_R$  (**2a**) = 14.09 [60 °C (3 min), 300 °C (15 °C/min), 300 °C (5 min)], HP-5). This procedure was repeated to verify the obtained values giving 15.8% yield at 30% conversion. The measured absorbance at 380 nm is very high throughout the reaction ranging from  $A_{380\text{nm}}(t=0 \text{ min.})=0.995$  (OD = 2.3) to  $A_{380\text{nm}}(t=60 \text{ min.})=0.997$  (OD = 2.15). The integration over the wavelength region of the LED-emission was performed in time increments of 30 seconds and used in the calculation of the quantum yield. Due to the very high optical density throughout the reaction, the difference between the calculation given below, which is based on average values and an incremental evaluation of the quantum yield (calculated quantum yield 0.0372) is marginal.

$$\Phi = \frac{\dot{n}(\mathbf{2a})}{I_0 \cdot \bar{\beta}} = \frac{2.678 \cdot 10^{-9} \text{ mol/s}}{7.24 \cdot 10^{-8} \text{ mol/s} \cdot 0.996} = 0.0371$$

From the uncertainty of the photon flux and the uncertainty of the yield (and in turn the conversion rate) an error of  $\pm 0.002$  can be given which allows to give a quantum yield of  $\varphi=0.037\pm 0.002$ .

## 12. References

- [1] R. Alonso and T. Bach, *Angew. Chem. Int. Ed.*, 2014, **53**, 4368-4371.
- [2] L. Mohr and T. Bach, *Synlett*, 2017, **28**, 2946-2950.
- [3] C. Xu, J. Du, L. Ma, G. Li, M. Tao and W. Zhang, *Tetrahedron*, 2013, **69**, 4749-4757.
- [4] Q. Yan, M. Liu, D. Kong, G. Zi and G. Hou, *Chem. Commun.*, 2014, **50**, 12870-12872.
- [5] M. Sathish, J. Chetna, N. Hari Krishna, N. Shankaraiah, A. Alarifi and A. Kamal, *J. Org. Chem.*, 2016, **81**, 2159-2165.
- [6] S. Maity, T. Naveen, U. Sharma and D. Maiti, *Org. Lett.*, 2013, **15**, 3384-3387.
- [7] T. Naveen, S. Maity, U. Sharma and D. Maiti, *J. Org. Chem.*, 2013, **78**, 5949-5954.
- [8] M. Zhang, P. Hu, J. Zhou, G. Wu, S. Huang and W. Su, *Org. Lett.*, 2013, **15**, 1718-1721.
- [9] D. A. R. Happer and B. E. Steenson, *J. Chem. Soc., Perkin Trans. 2*, 1988, 19-24.
- [10] J. Mo, L. Wang and X. Cui, *Org. Lett.*, 2015, **17**, 4960-4963.
- [11] D. Albrecht and T. Bach, *Synlett*, 2007, 1557-1560.
- [12] M. M. Coulter, P. K. Dornan and V. M. Dong, *J. Am. Chem. Soc.*, 2009, **131**, 6932-6933.
- [13] T. Y. R. Chen, M. R. Anderson, S. Grossman and D. G. Peters, *J. Org. Chem.*, 1987, **52**, 1231-1236.
- [14] G. Hu, J. Xu and P. Li, *Org. Lett.*, 2014, **16**, 6036-6039.
- [15] J. Li, J. Chen, W. Jiao, G. Wang, Y. Li, X. Cheng and G. Li, *J. Org. Chem.*, 2016, **81**, 9992-10001.
- [16] A. S. Vellekoop and R. A. J. Smith, *J. Am. Chem. Soc.*, 1994, **116**, 2902-2913.
- [17] G. Povie, A.-T. Tran, D. Bonnaffé, J. Habegger, Z. Hu, C. Le Narvor and P. Renaud, *Angew. Chem. Int. Ed.*, 2014, **53**, 3894-3898.
- [18] B. B. Khatri and S. M. Sieburth, *Org. Lett.*, 2015, **17**, 4360-4363.
- [19] G. Talavera, E. Reyes, J. L. Vicario and L. Carrillo, *Angew. Chem. Int. Ed.*, 2012, **51**, 4104-4107.
- [20] D. J. Cowley, *J. Chem. Soc., Perkin Trans. 2*, 1975, 1576-1580.

- [21] *APEX suite of crystallographic software*, APEX 3, Version 2015-5.2, Bruker AXS Inc., Madison, Wisconsin, USA, 2015.
- [22] *SAINT*, Version 8.34A and *SADABS*, Versions 2014/5, Bruker AXS Inc., Madison, Wisconsin, USA, 2014.
- [23] G. M. Sheldrick, *Acta Crystallogr. Sect. A*, 2015, **71**, 3–8.
- [24] G. M. Sheldrick, *Acta Crystallogr. Sect. C*, 2015, **71**, 3–8.
- [25] C. B. Hübschle, G. M. Sheldrick and B. Dittrich, *J. Appl. Cryst.*, 2011, **44**, 1281–1284.
- [26] *International Tables for Crystallography, Vol. C* (Ed.: A. J. Wilson), Kluwer Academic Publishers, Dordrecht, The Netherlands, **1992**, Tables 6.1.1.4 (pp. 500–502), 4.2.6.8 (pp. 219–222), and 4.2.4.2 (pp. 193–199).
- [27] C. F. Macrae, I. J. Bruno, J. A. Chisholm, P. R. Edgington, P. McCabe, E. Pidcock, L. Rodriguez-Monge, R. Taylor, J. van de Streek and P. A. Wood, *J. Appl. Cryst.*, 2008, **41**, 466–470.
- [28] A. L. Spek, *Acta Crystallogr. Sect. D*, 2009, **65**, 148–155.
- [29] A. Hölzl-Hobmeier, A. Bauer, A. Vieira Silva, S. M. Huber, C. Bannwarth and T. Bach, *Nature*, 2018, **564**, 240–243.
- [30] S. Poplata, A. Bauer, G. Storch and T. Bach, *Chem. Eur. J.*, 2019, **25**, in print.
- [31] H. J. Kuhn, S. E. Braslavsky and R. Schmidt, *Pure Appl. Chem.*, 2004, **76**, 2105–2146.
- [32] A. Defoin, R. Defoin-Straatmann, K. Hildenbrand, E. Bittersmann, D. Kreft and H. J. Kuhn, *J. Photochem.* 1986, **33**, 237–255.
